# Supplementary material for: Visible light-induced cascade annulation of sulfoxonium ylides with azides for the synthesis of 2-trifluoromethyl indoles
Source: Royal Society of Chemistry journal article supplement (doi:10.1039/d4cc05513f), 2024-12-02

## Supporting Information

### Visible light-induced cascade annulation of sulfoxonium ylides with azides for the synthesis of 2-trifluoromethyl indoles

Jia-Huan Cui,<sup>a</sup> Qian-Yu Chen,<sup>a</sup> Jun Zhang,<sup>a</sup> Yan He,<sup>\*b</sup> Xingguang Li<sup>\*a</sup> and Pei-Nian Liu<sup>\*ac</sup>

<sup>a</sup>Shanghai Key Laboratory of Functional Materials Chemistry, Key Laboratory for Advanced Materials, School of Chemistry and Molecular Engineering, East China University of Science & Technology, Shanghai 200237, China.

<sup>b</sup>College of Chemistry and Chemical Engineering, Jishou University, Jishou 416000, China.

<sup>c</sup>State Key Laboratory of Natural Medicines, School of Pharmacy, China Pharmaceutical University, Nanjing 210009, China.

\*Correspondence and requests for materials should be addressed to He Y (heyansu@126.com), Li XG (e-mail: lixingguang@ecust.edu.cn) and Liu PN (e-mail: liupn@ecust.edu.cn)

### Table of contents

|                                                                                         |    |
|-----------------------------------------------------------------------------------------|----|
| 1. General information .....                                                            | 2  |
| 2. Synthesis of the substrates and products.....                                        | 2  |
| 3. Scale-up reactions .....                                                             | 34 |
| 4. Synthetic transformations .....                                                      | 35 |
| 5. Control experiments.....                                                             | 38 |
| 6. Radical-trapping experiments.....                                                    | 41 |
| 7. Kinetic isotope experiments.....                                                     | 42 |
| 7.1. Parallel reaction .....                                                            | 42 |
| 7.2. Competitive reaction.....                                                          | 43 |
| 8. Crystal data and structural refinement of compounds <b>3aa</b> and <b>3af'</b> ..... | 45 |
| 9. References.....                                                                      | 68 |
| 10. Copies of the NMR spectra.....                                                      | 65 |

## 1. General information

All reactions were prepared under nitrogen atmosphere using standard Schlenk techniques, unless otherwise noted below. All reagents were from commercial sources and used as received without further purification. All solvents were dried by standard techniques and distilled prior to use.  $^1\text{H}$ ,  $^{13}\text{C}$ ,  $^{19}\text{F}$  NMR spectra were collected on a Bruker AV 400 MHz NMR spectrometer using residue solvent peaks as an internal standard ( $^1\text{H}$  NMR:  $\text{CDCl}_3$ ,  $\delta$  7.26 ppm, acetone- $d_6$  at 2.05 ppm;  $^{13}\text{C}$  NMR:  $\text{CDCl}_3$  at 77.16 ppm, acetone- $d_6$  at 29.84 ppm). All coupling constants ( $J$ ) are reported in Hz. Blue light reactor (8 wells, 72 W, maximum emission around 450-465 nm) was purchased from Wuhan Geochemical Technology Co., Ltd. (China). The magnetic stirrer (IKA RCT Basic) was used to stir the mixed solution at high speed. The following abbreviations were used to describe peak splitting patterns when appropriate: s = singlet, d = doublet, dd = double doublet, ddd = double doublet of doublets, t = triplet, dt = double triplet, q = quatriplet, m = multiplet, br = broad. HRMS all data were obtained using ESI-TOF (Electrospray ionization-time of flight) or Waters GCT Premier mass spectrometer using EI-TOF (electron ionization-time of flight). The X-ray diffraction patterns was recorded on a Bruker D8 Venture (Ga) Single Crystal XRD system. All melting points were measured with the samples after column chromatography and uncorrected.

## 2. Synthesis of the substrates and products

The sulfoxonium ylides **1a-n**,<sup>1</sup> **1o**,<sup>2</sup> **1p**,<sup>3</sup> **1q**,<sup>2</sup> and **1r**<sup>4</sup> were synthesized according to the published procedures, the azides **2a**,<sup>5</sup> **2b-e**,<sup>6</sup> **2f**,<sup>7</sup> **2g-h**,<sup>6</sup> **2i-k**,<sup>8</sup> **2l-m**,<sup>7</sup> **2o**,<sup>5</sup> and **2p**<sup>9</sup> were synthesized according to the published procedures.

### General procedure A: the preparation of Sulfoxonium Ylides 1a-q

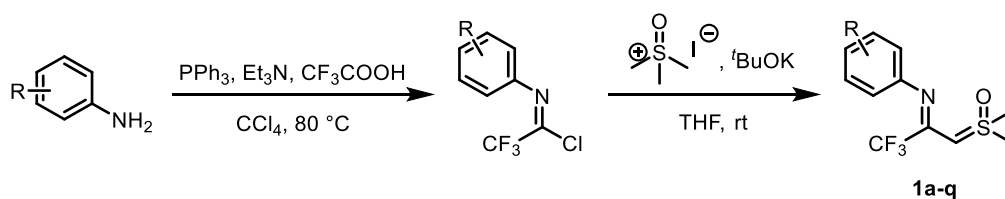

To a solution of triphenylphosphine (60 mmol, 3.0 equiv) in  $\text{CCl}_4$  (100 mL), triethylamine (24 mmol, 1.2 equiv) and fluorinated carboxylic acid (20 mmol, 1.0 equiv) were added dropwise at  $0\text{ }^\circ\text{C}$ . After stirring for 10 min at  $0\text{ }^\circ\text{C}$ , aniline (20 mmol, 1.0 equiv) was added. The mixture was refluxed on an oil bath for 4 h and then cooled at room temperature, and then filtered under reduced pressure. The filtrate was concentrated under vacuum, and the resulting residue was purified by flash chromatography on silica gel with petroleum ether.

Trimethylsulfoxonium iodide (3.0 equiv) was suspended in THF (150 mL) in a 250 mL round bottom flask. *t*-BuOK (3.0 equiv) was added and the mixture was stirred at room temperature for 2 hours. After, fluorinated acetimidoyl chloride (1.0 equiv) was added. The mixture was stirred at room temperature for 3 h and then filtered through a plug of celite before all volatiles were removed under vacuum. Purification by flash chromatography afforded products.

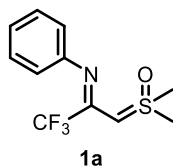

**(*E*)-3-(dimethyl(oxo)- $\lambda^6$ -sulfaneylidene)-1,1,1-trifluoro-*N*-phenylpropan-2-imine (1a)** was prepared from aniline and 2,2,2-trifluoroacetic acid according to the General Procedure A (eluent: PE/EA = 3:1) in 65% yield (3.4 g, 2 steps).

$^1\text{H NMR}$  (400 MHz,  $\text{CDCl}_3$ )  $\delta$  7.24 (t,  $J = 7.0$  Hz, 2H), 6.99 (t,  $J = 7.1$  Hz, 1H), 6.79 (d,  $J = 7.7$  Hz, 2H), 4.13 (s, 1H), 3.48 (s, 6H).

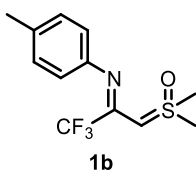

**(E)-3-(dimethyl(oxo)- $\lambda^6$ -sulfaneylidene)-1,1,1-trifluoro-N-(*p*-tolyl)propan-2-imine (1b)**

was prepared from *p*-toluidine and 2,2,2-trifluoroacetic acid according to the General Procedure A (eluent: PE/EA = 3:1) in 63% yield (3.5 g, 2 steps).

$^1\text{H NMR}$  (400 MHz,  $\text{CDCl}_3$ )  $\delta$  7.05 (d,  $J = 7.6$  Hz, 2H), 6.70 (d,  $J = 7.5$  Hz, 2H), 4.10 (s, 1H), 3.47 (s, 6H), 2.30 (s, 3H).

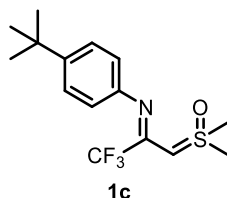

**(E)-N-(4-(*tert*-butyl)phenyl)-3-(dimethyl(oxo)- $\lambda^6$ -sulfaneylidene)-1,1,1-trifluoropropan-2-imine (1c)** was prepared from 4-(*tert*-butyl)aniline and 2,2,2-trifluoroacetic acid according to the General Procedure A (eluent: PE/EA = 3:1) in 25% yield (1.57 g, 2 steps).

$^1\text{H NMR}$  (400 MHz,  $\text{CDCl}_3$ )  $\delta$  7.26 (d,  $J = 6.8$  Hz, 2H), 6.73 (d,  $J = 7.1$  Hz, 2H), 4.08 (s, 1H), 3.47 (s, 6H), 1.30 (s, 9H).

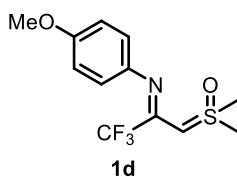

**(E)-3-(dimethyl(oxo)- $\lambda^6$ -sulfaneylidene)-1,1,1-trifluoro-N-(4-methoxyphenyl)propan-2-imine (1d)** was prepared from 4-methoxyaniline and 2,2,2-trifluoroacetic acid according to the General Procedure A (eluent: PE/EA = 3:1) in 49% yield (2.86 g, 2 steps).

$^1\text{H NMR}$  (400 MHz,  $\text{CDCl}_3$ )  $\delta$  6.91-6.63 (m, 4H), 4.11 (s, 1H), 3.78 (s, 3H), 3.47 (s, 6H).

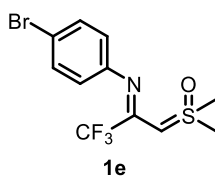

**(E)-N-(4-bromophenyl)-3-(dimethyl(oxo)- $\lambda^6$ -sulfaneylidene)-1,1,1-trifluoropropan-2-imine (1e)** was prepared from 4-bromoaniline and 2,2,2-trifluoroacetic acid according to the General Procedure A (eluent: PE/EA = 3:1) in 50% yield (3.41 g, 2 steps).

$^1\text{H NMR}$  (400 MHz,  $\text{CDCl}_3$ )  $\delta$  7.33 (d,  $J = 8.1$  Hz, 2H), 6.67 (d,  $J = 8.1$  Hz, 2H), 4.17 (s, 1H), 3.45 (s, 6H).

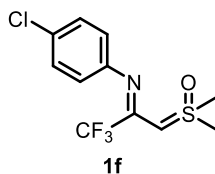

**(E)-N-(4-chlorophenyl)-3-(dimethyl(oxo)- $\lambda^6$ -sulfaneylidene)-1,1,1-trifluoropropan-2-imine (1f)** was prepared from 4-chloroaniline and 2,2,2-trifluoroacetic acid according to the General Procedure A (eluent: PE/EA = 3:1) in 37% yield (2.19 g, 2 steps).

$^1\text{H NMR}$  (400 MHz,  $\text{CDCl}_3$ )  $\delta$  7.19 (d,  $J = 7.0$  Hz, 2H), 6.72 (d,  $J = 8.1$  Hz, 2H), 4.17 (s, 1H), 3.47 (s, 6H).

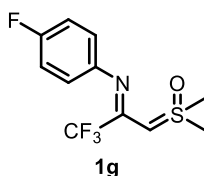

**(E)-3-(dimethyl(oxo)- $\lambda^6$ -sulfaneylidene)-1,1,1-trifluoro-N-(4-fluorophenyl)propan-2-imine (1g)** was prepared from 4-fluoroaniline and 2,2,2-trifluoroacetic acid according to the General Procedure A (eluent: PE/EA = 3:1) in 55% yield (3.1 g, 2 steps).

$^1\text{H NMR}$  (400 MHz,  $\text{CDCl}_3$ )  $\delta$  6.93 (s, 2H), 6.73 (s, 2H), 4.15 (s, 1H), 3.48 (s, 6H).

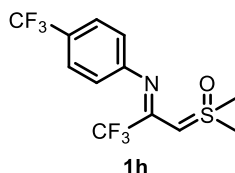

**(E)-3-(dimethyl(oxo)- $\lambda^6$ -sulfaneylidene)-1,1,1-trifluoro-N-(4-(trifluoromethyl)phenyl)propan-2-imine (1h)** was prepared from 4-(trifluoromethyl)aniline and 2,2,2-trifluoroacetic acid according to the General Procedure A (eluent: PE/EA = 3:1) in 51% yield (3.4 g, 2 steps).

$^1\text{H NMR}$  (400 MHz,  $\text{CDCl}_3$ )  $\delta$  7.48 (d,  $J = 8.3$  Hz, 2H), 6.85 (d,  $J = 8.2$  Hz, 2H), 4.18 (s, 1H), 3.45 (s, 6H).

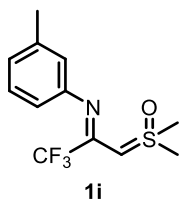

**(E)-3-(dimethyl(oxo)-λ<sup>6</sup>-sulfaneylidene)-1,1,1-trifluoro-N-(*m*-tolyl)propan-2-imine (1i)**

was prepared from *m*-toluidine and 2,2,2-trifluoroacetic acid according to the General Procedure A (eluent: PE/EA = 3:1) in 63% yield (3.5 g, 2 steps).

<sup>1</sup>H NMR (400 MHz, CDCl<sub>3</sub>) δ 7.13 (t, *J* = 7.0 Hz, 1H), 6.81 (d, *J* = 7.5 Hz, 1H), 6.69-6.53 (m, 2H), 4.11 (s, 1H), 3.47 (s, 6H), 2.31 (s, 3H).

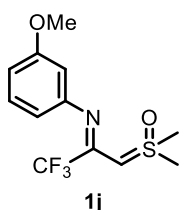

**(E)-3-(dimethyl(oxo)-λ<sup>6</sup>-sulfaneylidene)-1,1,1-trifluoro-N-(3-methoxyphenyl)propan-2-**

**imine (1j)** was prepared from 3-methoxyaniline and 2,2,2-trifluoroacetic acid according to the General Procedure A (eluent: PE/EA = 3:1) in 50% yield (2.9 g, 2 steps).

<sup>1</sup>H NMR (400 MHz, CDCl<sub>3</sub>) δ 7.13 (s, 1H), 6.54 (s, 1H), 6.36 (s, 2H), 4.16 (s, 1H), 3.80-3.71 (m, 3H), 3.41 (s, 6H).

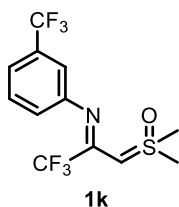

**(E)-3-(dimethyl(oxo)-λ<sup>6</sup>-sulfaneylidene)-1,1,1-trifluoro-N-(3-**

**(trifluoromethyl)phenyl)propan-2-imine (1k)** was prepared from 3-(trifluoromethyl)aniline and 2,2,2-trifluoroacetic acid according to the General Procedure A (eluent: PE/EA = 3:1) in 53% yield (3.5 g, 2 steps).

<sup>1</sup>H NMR (400 MHz, CDCl<sub>3</sub>) δ 7.33 (t, *J* = 7.7 Hz, 1H), 7.22 (d, *J* = 7.6 Hz, 1H), 7.04 (s, 1H), 6.95 (d, *J* = 7.8 Hz, 1H), 4.20 (s, 1H), 3.47 (s, 6H).

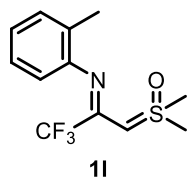

**(E)-3-(dimethyl(oxo)-λ<sup>6</sup>-sulfaneylidene)-1,1,1-trifluoro-N-(*o*-tolyl)propan-2-imine (1l)**

was prepared from *o*-toluidine and 2,2,2-trifluoroacetic acid according to the General Procedure A (eluent: PE/EA = 3:1) in 59% yield (3.3 g, 2 steps).

<sup>1</sup>H NMR (400 MHz, CDCl<sub>3</sub>) δ 7.19-7.04 (m, 2H), 6.92 (t, *J* = 7.5 Hz, 1H), 6.66 (s, 1H), 4.13 (s, 1H), 3.48 (s, 6H).

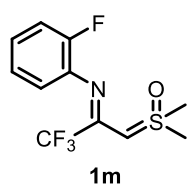

**(E)-3-(dimethyl(oxo)-λ<sup>6</sup>-sulfaneylidene)-1,1,1-trifluoro-N-(2-fluorophenyl)propan-2-**

**imine (1m)** was prepared from 2-fluoroaniline and 2,2,2-trifluoroacetic acid according to the General Procedure A (eluent: PE/EA = 3:1) in 41% yield (2.3 g, 2 steps).

<sup>1</sup>H NMR (400 MHz, CDCl<sub>3</sub>) δ 7.05-6.97 (m, 2H), 6.97-6.91 (m, 1H), 6.86 (t, *J* = 8.2 Hz, 1H), 4.19 (s, 1H), 3.50 (s, 6H).

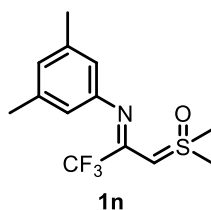

**(E)-3-(dimethyl(oxo)-λ<sup>6</sup>-sulfaneylidene)-N-(3,5-dimethylphenyl)-1,1,1-trifluoropropan-2-**

**imine (1n)** was prepared from 3,5-dimethylaniline and 2,2,2-trifluoroacetic acid according to the General Procedure A (eluent: PE/EA = 3:1) in 53% yield (3.1 g, 2 steps).

**Physical state:** white solid.

**M.p.:** 89.9-90.3 °C.

<sup>1</sup>H NMR (400 MHz, CDCl<sub>3</sub>) δ 6.65 (s, 1H), 6.44 (s, 2H), 4.09 (s, 1H), 3.42 (s, 6H), 2.27 (s, 6H).

$^{13}\text{C}$  NMR (100 MHz,  $\text{CDCl}_3$ )  $\delta$  150.4, 148.9, 138.1, 124.2, 118.3, 59.1, 41.4, 21.3.

$^{19}\text{F}$  NMR (376 MHz,  $\text{CDCl}_3$ )  $\delta$  -62.65.

HRMS (ESI, TOF)  $m/z$ :  $[\text{M}+\text{H}]^+$  calcd for  $\text{C}_{13}\text{H}_{16}\text{F}_3\text{NOS}$  292.0978, found: 292.0984.

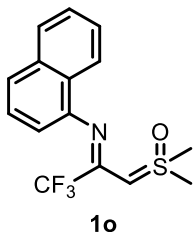

**(E)-3-(dimethyl(oxo)- $\lambda^6$ -sulfaneylidene)-1,1,1-trifluoro-N-(naphthalen-1-yl)propan-2-imine (1o)** was prepared from naphthalen-1-amine and 2,2,2-trifluoroacetic acid according to the General Procedure A (eluent: PE/EA = 3:1) in 22% yield (1.4 g, 2 steps).

$^1\text{H}$  NMR (400 MHz,  $\text{CDCl}_3$ )  $\delta$  7.88-7.76 (m, 2H), 7.55-7.33 (m, 4H), 6.79 (s, 1H), 4.26 (s, 1H), 3.45 (s, 6H).

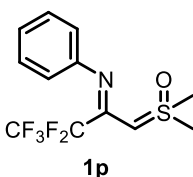

**(E)-1-(dimethyl(oxo)- $\lambda^6$ -sulfaneylidene)-3,3,4,4,4-pentafluoro-N-phenylbutan-2-imine (1p)** was prepared from aniline and 2,2,3,3,3-pentafluoropropanoic acid according to the General Procedure A (eluent: PE/EA = 3:1) in 24% yield (1.5 g, 2 steps).

$^1\text{H}$  NMR (400 MHz,  $\text{CDCl}_3$ )  $\delta$  7.27 (t,  $J = 7.7$  Hz, 2H), 7.00 (t,  $J = 7.4$  Hz, 1H), 6.80 (s, 2H), 3.98 (s, 1H), 3.19 (s, 6H).

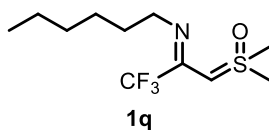

**(E)-1-(dimethyl(oxo)- $\lambda^6$ -sulfaneylidene)-1,1,1-trifluoro-N-phenylbutan-2-imine (1q)** was prepared from hexan-1-amine and 2,2,2-trifluoroacetic acid according to the General Procedure A (eluent: PE/EA = 3:1) in 31% yield (1.7 g, 2 steps).

$^1\text{H}$  NMR (400 MHz,  $\text{CDCl}_3$ )  $\delta$  4.69 (s, 1H), 3.42 (s, 6H), 1.58 (t,  $J = 5.64$  Hz, 2H), 1.38-1.18 (m, 6H), 0.83 (t,  $J = 6.4$  Hz, 3H).



## General procedure B: the preparation of Sulfoxonium Ylides 1r

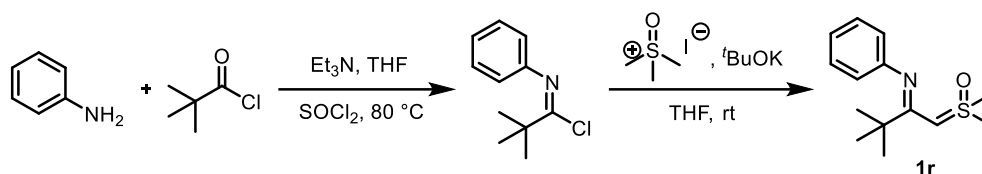

To a dry round-bottom flask containing aniline solution (20 mmol, 1 equiv) in THF (100 mL) and triethylamine (26 mmol, 1.3 equiv) at 0 °C was added pivaloyl chloride (22 mmol, 1.1 equiv) dropwise. The reaction mixture was increased to room temperature, and stirred for 12 h. The resulting mixture was filtered to remove NH<sub>4</sub>Cl salt, and the solvent was evaporated. The resulting solid was washed with hexane to obtain the *N*-phenylbenzamide or *N*-phenylpivalamide in quantitative yield. *N*-phenylbenzamide or *N*-phenylpivalamide (1.0 equiv) was then added to a flask coupled to a reflux system. This substrate was dissolved in thionyl chloride (10 mL) and heated in a preheated oil bath at 80 °C for 4 h. At the end of the reaction, the thionyl chloride was evaporated and the resulting mixture was washed with hexane, filtered, and concentrated on a rotary evaporator. The *N*-phenylbenzimidoyl chloride or *N*-phenylpivalimidoyl chloride obtained was then used directly in the next step without further purification.

Trimethylsulfoxonium iodide (3.0 equiv) was suspended in THF (100 mL) in a 250 mL round bottom flask, *t*-BuOK (3.0 equiv) was added and the mixture was stirred at room temperature for 2 hours. After, fluorinated acetimidoyl chloride (1.0 equiv) was added. The mixture was stirred at room temperature for 3 hours and then filtered through a plug of celite before all volatiles were removed under vacuum. Purification by flash chromatography afforded the product.

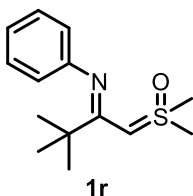

**(E)-1-(dimethyl(oxo)-λ<sup>6</sup>-sulfaneylidene)-3,3-dimethyl-N-phenylbutan-2-imine (1r)** was prepared from aniline and 2,2,2-trifluoroacetic acid according to the General Procedure B (eluent: PE/EA = 3:1) in 38% yield (1.9 g, 2 steps).

<sup>1</sup>H NMR (400 MHz, CDCl<sub>3</sub>) δ 7.17 (t, *J* = 7.8 Hz, 2H), 6.84 (t, *J* = 7.3 Hz, 1H), 6.72 (d, *J* = 7.3 Hz, 2H), 3.73 (s, 1H), 3.21 (s, 6H), 1.11 (s, 9H).

### General procedure C: the preparation of azides 2a, 2n-p

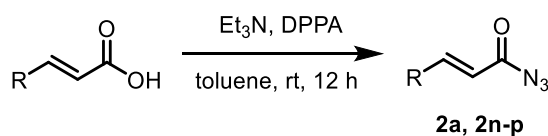

Under ambient atmosphere, cinnamic acid (15 mmol, 1.0 equiv) was added to a 100 mL round-bottom flask with a magnetic bar. toluene (25 mL) was charged. Then Et<sub>3</sub>N (2.5 mL, 18 mmol, 1.2 equiv) and diphenyl azidophosphate (3.56 mL, 16.5 mmol, 1.1 equiv) were charged sequentially. The reaction was stirred at room temperature for 12 h which was washed with H<sub>2</sub>O (32 mL). The aqueous phase was washed with toluene (2 × 30 mL). The organic layer was dried over anhydrous sodium sulphate (Na<sub>2</sub>SO<sub>4</sub>), concentrated and subjected for silica gel to obtain the desired products.

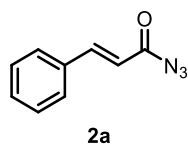

**cinnamoyl azide (2a)** was prepared from cinnamic acid according to the General Procedure C (eluent: PE/EA = 100:1) in 75% yield (1.9 g).

<sup>1</sup>H NMR (400 MHz, CDCl<sub>3</sub>) δ 7.76 (d, *J* = 15.9 Hz, 1H), 7.55-7.53 (m, 2H), 7.45-7.38 (m, 3H), 6.43 (d, *J* = 15.8 Hz, 1H).

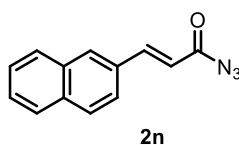

**(E)-3-(naphthalen-2-yl)acryloyl azide (2n)** was prepared from cinnamic acid according to the General Procedure C (eluent: PE/EA = 100:1) in 70% yield (2.3 g).

**Physical state:** white solid.

**M.p.:** 110.1-110.6 °C.

**<sup>1</sup>H NMR (400 MHz, CDCl<sub>3</sub>)** δ 7.95-7.81 (m, 5H), 7.64 (d, *J* = 8.5 Hz, 1H), 7.58-7.48 (m, 2H), 6.52 (d, *J* = 15.8 Hz, 1H).

**<sup>13</sup>C NMR (100 MHz, CDCl<sub>3</sub>)** δ 172.2, 146.9, 134.7, 133.3, 131.4, 131.1, 129.0, 128.9, 127.9, 127.8, 127.0, 123.5, 119.2.

**HRMS (EI, TOF) m/z:** [M]<sup>+</sup> calcd for C<sub>13</sub>H<sub>9</sub>N<sub>3</sub>O 223.0746, found: 223.0748.

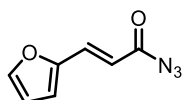

**2o**

**(E)-3-(furan-2-yl)acryloyl azide (2o)** was prepared from cinnamic acid according to the General Procedure C (eluent: PE/EA = 100:1) in 83% yield (2.0 g).

**<sup>1</sup>H NMR (400 MHz, CDCl<sub>3</sub>)** δ 7.52 (s, 1H), 7.48 (d, *J* = 15.6 Hz, 1H), 6.71 (d, *J* = 3.4 Hz, 1H), 6.50 (dd, *J* = 3.5, 1.8 Hz, 1H), 6.30 (d, *J* = 15.5 Hz, 1H).

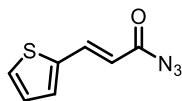

**2p**

**(E)-3-(thiophen-2-yl)acryloyl azide (2p)** was prepared from cinnamic acid according to the General Procedure C (eluent: PE/EA = 100:1) in 76% yield (2.0 g).

**<sup>1</sup>H NMR (400 MHz, CDCl<sub>3</sub>)** δ 7.85 (d, *J* = 15.5 Hz, 1H), 7.45 (d, *J* = 5.1 Hz, 1H), 7.31 (d, *J* = 3.7 Hz, 1H), 7.08 (t, *J* = 4.5 Hz, 1H), 6.21 (d, *J* = 15.6 Hz, 1H).

### General procedure D: the preparation of azides 2b-m

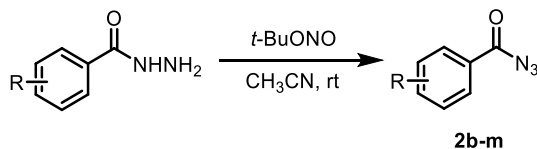

The substituted carbonyl hydrazines (8 mmol) was stirred in acetonitrile (20 mL) at room temperature to which 3 equiv. of tert-butyl nitrite (TBN) was added. The progress of the reaction was monitored by TLC. After completion, acetonitrile was evaporated and then, the reaction mixture was diluted with water and extracted with ethyl acetate. The organic layer was dried

over anhydrous sodium sulphate ( $\text{Na}_2\text{SO}_4$ ), concentrated and subjected for silica gel to obtain the desired products.

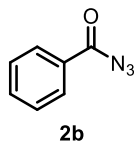

**benzoyl azide (2b)** was prepared from carbonyl hydrazine according to the General Procedure D (eluent: PE/EA = 100:1) in 36% yield (420 mg).

$^1\text{H NMR}$  (400 MHz,  $\text{CDCl}_3$ )  $\delta$  8.06-7.99 (m, 2H), 7.65-7.57 (m, 1H), 7.46 (t,  $J = 7.8$  Hz, 2H).

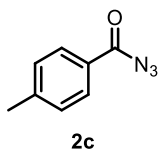

**4-methylbenzoyl azide (2c)** was prepared from 4-methylbenzohydrazide according to the General Procedure D (eluent: PE/EA = 100:1) in 40% yield (516 mg).

$^1\text{H NMR}$  (400 MHz,  $\text{CDCl}_3$ )  $\delta$  7.92 (d,  $J = 8.1$  Hz, 2H), 7.25 (d,  $J = 9.1$  Hz, 2H), 2.42 (s, 3H).

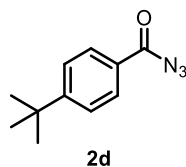

**4-(*tert*-butyl)benzoyl azide (2d)** was prepared from 4-(*tert*-butyl)benzohydrazide according to the General Procedure D (eluent: PE/EA = 100:1) in 37% yield (601 mg).

$^1\text{H NMR}$  (400 MHz,  $\text{CDCl}_3$ )  $\delta$  7.98-7.92 (m, 2H), 7.50-7.44 (m, 2H), 1.34 (s, 9H).

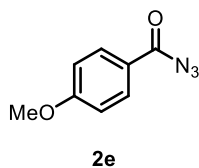

**4-methoxybenzoyl azide (2e)** was prepared from 4-methoxybenzohydrazide according to the General Procedure D (eluent: PE/EA = 100:1) in 30% yield (425 mg).

$^1\text{H NMR}$  (400 MHz,  $\text{CDCl}_3$ )  $\delta$  8.00-7.93 (m, 2H), 6.95-6.89 (m, 2H), 3.87 (s, 3H).

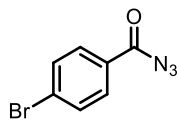

**2f**

**4-bromobenzoyl azide (2f)** was prepared from 4-bromobenzohydrazide according to the General Procedure D (eluent: PE/EA = 100:1) in 13% yield (234 mg).

$^1\text{H NMR}$  (400 MHz,  $\text{CDCl}_3$ )  $\delta$  7.91-7.84 (m, 2H), 7.63-7.56 (m, 2H).

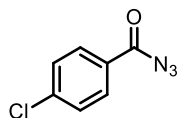

**2g**

**4-chlorobenzoyl azide (2g)** was prepared from 4-chlorobenzohydrazide according to the General Procedure D (eluent: PE/EA = 100:1) in 36% yield (521 mg).

$^1\text{H NMR}$  (400 MHz,  $\text{CDCl}_3$ )  $\delta$  7.96 (d,  $J = 8.7$  Hz, 2H), 7.43 (d,  $J = 8.6$  Hz, 2H).

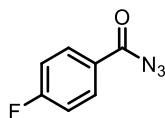

**2h**

**4-fluorobenzoyl azide (2h)** was prepared from 4-fluorobenzohydrazide according to the General Procedure D (eluent: PE/EA = 100:1) in 31% yield (410 mg).

$^1\text{H NMR}$  (400 MHz,  $\text{CDCl}_3$ )  $\delta$  8.07-7.99 (m, 2H), 7.15-7.07 (m, 2H).

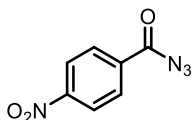

**2i**

**4-nitrobenzoyl azide (2i)** was prepared from 4-nitrobenzohydrazide according to the General Procedure D (eluent: PE/EA = 100:1) in 14% yield (215 mg).

$^1\text{H NMR}$  (400 MHz,  $\text{CDCl}_3$ )  $\delta$  8.34-8.26 (m, 2H), 8.24-8.17 (m, 2H).

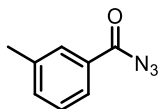

**2j**

**3-methylbenzoyl azide (2j)** was prepared from 3-methylbenzohydrazide according to the General Procedure D (eluent: PE/EA = 100:1) in 42% yield (540 mg).

$^1\text{H NMR}$  (400 MHz,  $\text{CDCl}_3$ )  $\delta$  7.83 (d,  $J = 10.9$  Hz, 2H), 7.42 (d,  $J = 7.6$  Hz, 1H), 7.34 (t,  $J = 7.6$  Hz, 1H), 2.40 (s, 3H).

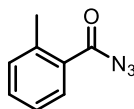

**2k**

**2-methylbenzoyl azide (2k)** was prepared from 2-methylbenzohydrazide according to the General Procedure D (eluent: PE/EA = 100:1) in 12% yield (155 mg).

$^1\text{H NMR}$  (400 MHz,  $\text{CDCl}_3$ )  $\delta$  7.22-7.18 (m, 1H), 7.16 (dd,  $J = 7.5, 2.1$  Hz, 1H), 7.14-7.05 (m, 2H), 2.35 (s, 3H).

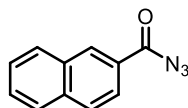

**2l**

**2-naphthoyl azide (2l)** was prepared from 2-naphthohydrazide according to the General Procedure D (eluent: PE/EA = 100:1) in 23% yield (363 mg).

$^1\text{H NMR}$  (400 MHz,  $\text{CDCl}_3$ )  $\delta$  8.61 (s, 1H), 8.04 (dd,  $J = 8.6, 1.8$  Hz, 1H), 7.97 (d,  $J = 7.6$  Hz, 1H), 7.89 (dd,  $J = 8.4, 2.7$  Hz, 2H), 7.67-7.52 (m, 2H).

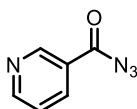

**2m**

**nicotinoyl azide (2m)** was prepared from 2-naphthohydrazide according to the General Procedure D (eluent: PE/EA = 5:1) in 60% yield (710 mg).

$^1\text{H NMR}$  (400 MHz,  $\text{CDCl}_3$ )  $\delta$  9.20 (d,  $J = 1.7$  Hz, 1H), 8.81 (dd,  $J = 4.9, 1.7$  Hz, 1H), 8.27 (dt,  $J = 8.0, 2.0$  Hz, 1H), 7.41 (ddd,  $J = 8.0, 4.9, 0.9$  Hz, 1H).

**General procedure E: the preparation of product 3aa-3pa, 3ab-3ap**

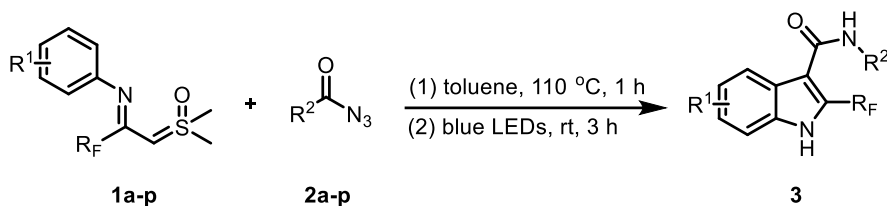

A dried 10 mL Schlenk tube was charged with azides **2a-p** (0.36 mmol, 1.2 equiv) and toluene (3.0 mL) under nitrogen atmosphere. The reaction mixture was stirred in a preheated oil bath at 110 °C for 1 h. Then cooled at room temperature, **1a-p** (0.3 mmol) was added. The reaction mixture was irradiation by blue LEDs at room temperature for 3 h under nitrogen atmosphere. After reaction finished, the reaction solution was evaporated under reduced pressure and purified by column chromatography (PE/EA = 3:1) to afford the pure product **3**.

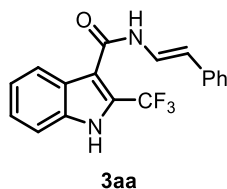

**(E)-N-styryl-2-(trifluoromethyl)-1H-indole-3-carboxamide (3aa)** was prepared from cinnamoyl azide and *(E)*-3-(dimethyl(oxo)-λ<sup>6</sup>-sulfaneylidene)-1,1,1-trifluoro-*N*-phenylpropan-2-imine according to the General Procedure E (eluent: PE/EA = 3:1) in 91% yield (90 mg).

**Physical state:** yellow oil.

**<sup>1</sup>H NMR (400 MHz, Acetone-*d*<sub>6</sub>)** δ 11.73 (s, 1H), 9.61 (d, *J* = 10.3 Hz, 1H), 7.93-7.77 (m, 2H), 7.60 (d, *J* = 8.3 Hz, 1H), 7.46-7.37 (m, 3H), 7.35-7.26 (m, 3H), 7.19 (t, *J* = 7.3 Hz, 1H), 6.52 (d, *J* = 14.7 Hz, 1H).

**<sup>13</sup>C NMR (100 MHz, Acetone-*d*<sub>6</sub>)** δ 161.2, 137.8, 136.1, 129.5, 127.2, 126.3, 126.1, 126.0, 125.9 (q, *J*<sub>C-F</sub> = 38.4 Hz), 124.4, 122.8, 121.8 (q, *J*<sub>C-F</sub> = 270.7 Hz), 122.0, 114.1, 113.7, 113.5.

**<sup>19</sup>F NMR (376 MHz, Acetone-*d*<sub>6</sub>)** δ -58.82.

**HRMS (ESI, TOF) m/z:** [M+H]<sup>+</sup> calcd for C<sub>18</sub>H<sub>13</sub>F<sub>3</sub>N<sub>2</sub>O 331.1053, found: 331.1047.

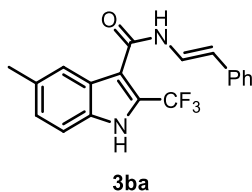

**(E)-5-methyl-N-styryl-2-(trifluoromethyl)-1H-indole-3-carboxamide (3ba)** was prepared from (*E*)-4-Phenyl-*N*-styrylbutanamide and (*E*)-3-(dimethyl(oxo)- $\lambda^6$ -sulfaneylidene)-1,1,1-trifluoro-*N*-(*p*-tolyl)propan-2-imine according to the General Procedure E (eluent: PE/EA = 3:1) in 90% yield (93 mg).

**Physical state:** yellow solid.

**M.p.:** 137.9-138.6 °C.

**<sup>1</sup>H NMR (400 MHz, CDCl<sub>3</sub>)**  $\delta$  9.67 (s, 1H), 7.88 (d, *J* = 10.8 Hz, 1H), 7.81-7.68 (m, 2H), 7.39-7.27 (m, 5H), 7.24-7.15 (m, 2H), 6.25 (d, *J* = 14.5 Hz, 1H), 2.45 (s, 3H).

**<sup>13</sup>C NMR (100 MHz, CDCl<sub>3</sub>)**  $\delta$  160.9, 136.0, 133.0, 132.6, 128.8, 127.5, 127.0, 125.8, 125.7, 125.5 (q, *J*<sub>C-F</sub> = 38.4 Hz), 122.5, 120.9 (q, *J*<sub>C-F</sub> = 271.7 Hz), 120.3, 113.9, 112.4, 111.1, 21.7.

**<sup>19</sup>F NMR (376 MHz, CDCl<sub>3</sub>)**  $\delta$  -57.76.

**HRMS (ESI, TOF) m/z:** [M+H]<sup>+</sup> calcd for C<sub>19</sub>H<sub>15</sub>F<sub>3</sub>N<sub>2</sub>O 345.1209, found: 345.1209.

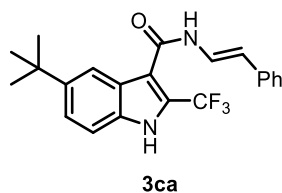

**(E)-5-(tert-butyl)-N-styryl-2-(trifluoromethyl)-1H-indole-3-carboxamide (3ca)** was prepared from (*E*)-4-Phenyl-*N*-styrylbutanamide and (*E*)-*N*-(4-(*tert*-butyl)phenyl)-3-(dimethyl(oxo)- $\lambda^6$ -sulfaneylidene)-1,1,1-trifluoropropan-2-imine according to the General Procedure E (eluent: PE/EA = 3:1) in 95% yield (110 mg).

**Physical state:** yellow solid.

**M.p.:** 246.6-247.3 °C.

**<sup>1</sup>H NMR (400 MHz, Acetone-*d*<sub>6</sub>)**  $\delta$  11.57 (s, 1H), 9.62 (d, *J* = 10.0 Hz, 1H), 7.86-7.80 (m, 2H), 7.52 (d, *J* = 1.3 Hz, 2H), 7.44 (d, *J* = 7.7 Hz, 2H), 7.32 (t, *J* = 7.6 Hz, 2H), 7.19 (t, *J* = 7.4 Hz, 1H), 6.50 (d, *J* = 14.8 Hz, 1H), 1.38 (s, 9H).

**<sup>13</sup>C NMR (100 MHz, Acetone-*d*<sub>6</sub>)**  $\delta$  161.4, 145.6, 137.8, 134.3, 129.5, 127.1, 126.2, 125.8, 125.5 (q, *J*<sub>C-F</sub> = 38.7 Hz), 124.7, 124.4, 122.1 (q, *J*<sub>C-F</sub> = 269.8 Hz), 117.3, 114.1, 113.5, 113.1, 35.3, 31.9.

**<sup>19</sup>F NMR (376 MHz, Acetone-*d*<sub>6</sub>)**  $\delta$  -58.60.



**HRMS (ESI, TOF) m/z:**  $[M+H]^+$  calcd for  $C_{22}H_{21}F_3N_2O$  387.1679, found: 387.1675.

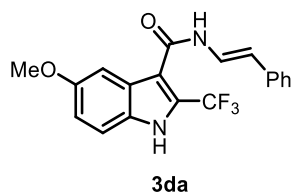

**(E)-5-methoxy-N-styryl-2-(trifluoromethyl)-1H-indole-3-carboxamide (3da)** was prepared from (*E*)-4-Phenyl-*N*-styrylbutanamide and (*E*)-3-(dimethyl(oxo)- $\lambda^6$ -sulfaneylidene)-1,1,1-trifluoro-*N*-(4-methoxyphenyl)propan-2-imine according to the General Procedure E (eluent: PE/EA = 3:1) in 93% yield (100 mg).

**Physical state:** yellow solid.

**M.p.:** 212.7-213.5 °C.

**$^1H$  NMR (400 MHz, Acetone-*d*6)**  $\delta$  11.60 (s, 1H), 9.52 (d,  $J = 10.3$  Hz, 1H), 7.81 (dd,  $J = 14.8, 10.3$  Hz, 1H), 7.49 (d,  $J = 9.0$  Hz, 1H), 7.44 (d,  $J = 7.6$  Hz, 2H), 7.36-7.28 (m, 3H), 7.18 (t,  $J = 7.4$  Hz, 1H), 7.04 (dd,  $J = 9.0, 2.4$  Hz, 1H), 6.51 (d,  $J = 14.8$  Hz, 1H), 3.86 (s, 3H).

**$^{13}C$  NMR (100 MHz, Acetone-*d*6)**  $\delta$  161.4, 156.6, 137.8, 131.0, 129.5, 127.1, 126.5, 126.2, 125.9 (q,  $J_{C-F} = 39.4$  Hz), 124.4, 122.0 (q,  $J_{C-F} = 269.7$  Hz), 117.3, 114.5, 113.7, 113.5, 102.4, 55.9.

**$^{19}F$  NMR (376 MHz, Acetone-*d*6)**  $\delta$  -58.63.

**HRMS (ESI, TOF) m/z:**  $[M+H]^+$  calcd for  $C_{19}H_{15}F_3N_2O_2$  361.1159, found: 361.1154.

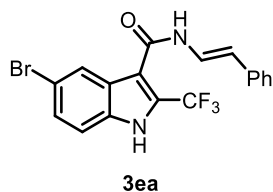

**(E)-5-bromo-N-styryl-2-(trifluoromethyl)-1H-indole-3-carboxamide (3ea)** was prepared from (*E*)-4-Phenyl-*N*-styrylbutanamide and (*E*)-*N*-(4-bromophenyl)-3-(dimethyl(oxo)- $\lambda^6$ -sulfaneylidene)-1,1,1-trifluoropropan-2-imine according to the General Procedure E (eluent: PE/EA = 3:1) in 89% yield (109 mg).

**Physical state:** yellow solid.

**M.p.:** 223.7-224.6 °C.

**<sup>1</sup>H NMR (400 MHz, Acetone-*d*6)** δ 11.90 (s, 1H), 9.68 (d, *J* = 10.3 Hz, 1H), 8.04 (s, 1H), 7.80 (dd, *J* = 14.7, 10.1 Hz, 1H), 7.57 (d, *J* = 8.8 Hz, 1H), 7.50 (dd, *J* = 8.8, 1.9 Hz, 1H), 7.44 (d, *J* = 7.7 Hz, 2H), 7.32 (t, *J* = 7.7 Hz, 2H), 7.19 (t, *J* = 7.3 Hz, 1H), 6.52 (d, *J* = 14.8 Hz, 1H).

**<sup>13</sup>C NMR (100 MHz, Acetone-*d*6)** δ 160.6, 137.7, 134.7, 129.5, 128.9, 127.4, 127.3, 127.1 (q, *J*<sub>C-F</sub> = 41.4 Hz), 126.3, 124.5, 124.2, 121.7 (q, *J*<sub>C-F</sub> = 270.7 Hz), 115.6, 115.5, 114.1, 113.6.

**<sup>19</sup>F NMR (376 MHz, Acetone-*d*6)** δ -59.06.

**HRMS (ESI, TOF) m/z:** [M+H]<sup>+</sup> calcd for C<sub>18</sub>H<sub>12</sub>BrF<sub>3</sub>N<sub>2</sub>O 409.0158, found: 409.0157.

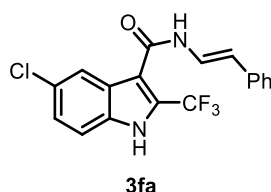

**(*E*)-5-chloro-*N*-styryl-2-(trifluoromethyl)-1*H*-indole-3-carboxamide (3fa)** was prepared from (*E*)-4-Phenyl-*N*-styrylbutanamide and (*E*)-*N*-(4-chlorophenyl)-3-(dimethyl(oxo)-λ<sup>6</sup>-sulfaneylidene)-1,1,1-trifluoropropan-2-imine according to the General Procedure E (eluent: PE/EA = 3:1) in 84% yield (92 mg).

**Physical state:** yellow oil.

**<sup>1</sup>H NMR (400 MHz, Acetone-*d*6)** δ 11.88 (s, 1H), 9.67 (d, *J* = 10.0 Hz, 1H), 7.88 (s, 1H), 7.80 (dd, *J* = 14.7, 10.2 Hz, 1H), 7.61 (d, *J* = 8.8 Hz, 1H), 7.43 (d, *J* = 7.7 Hz, 2H), 7.38 (dd, *J* = 8.9, 2.1 Hz, 1H), 7.32 (t, *J* = 7.6 Hz, 2H), 7.19 (t, *J* = 7.3 Hz, 1H), 6.52 (d, *J* = 14.8 Hz, 1H).

**<sup>13</sup>C NMR (100 MHz, Acetone-*d*6)** δ 160.6, 137.7, 134.4, 129.5, 128.1, 127.3, 127.2 (q, *J*<sub>C-F</sub> = 39.4 Hz), 126.8, 126.4, 126.3, 124.2, 121.7 (q, *J*<sub>C-F</sub> = 270.7 Hz), 121.3, 115.2, 114.1, 113.6.

**<sup>19</sup>F NMR (376 MHz, Acetone-*d*6)** δ -59.07.

**HRMS (ESI, TOF) m/z:** [M+H]<sup>+</sup> calcd for C<sub>18</sub>H<sub>12</sub>ClF<sub>3</sub>N<sub>2</sub>O 365.0663, found: 365.0659.

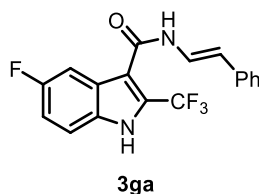

**(*E*)-5-fluoro-*N*-styryl-2-(trifluoromethyl)-1*H*-indole-3-carboxamide (3ga)** was prepared from (*E*)-4-Phenyl-*N*-styrylbutanamide and (*E*)-3-(dimethyl(oxo)-λ<sup>6</sup>-sulfaneylidene)-1,1,1-

trifluoro-*N*-(4-fluorophenyl)propan-2-imine according to the General Procedure E (eluent: PE/EA = 3:1) in 95% yield (99 mg).

**Physical state:** yellow solid.

**M.p.:** 162.7-163.5 °C.

**<sup>1</sup>H NMR (400 MHz, Acetone-*d*6)** δ 11.89 (s, 1H), 9.61 (s, 1H), 7.80 (dd, *J* = 14.7, 10.1 Hz, 1H), 7.65-7.56 (m, 2H), 7.43 (d, *J* = 7.6 Hz, 2H), 7.32 (t, *J* = 7.6 Hz, 2H), 7.24-7.16 (m, 2H), 6.52 (d, *J* = 14.8 Hz, 1H).

**<sup>13</sup>C NMR (100 MHz, Acetone-*d*6)** δ 160.8, 158.4, 137.7, 132.6, 129.5, 127.5 (q, *J*<sub>C-F</sub> = 39.4 Hz), 127.2, 126.3, 126.2, 124.2, 124.1, 121.8 (q, *J*<sub>C-F</sub> = 269.7 Hz), 115.1, 115.0 (d, *J*<sub>C-F</sub> = 35.4 Hz), 114.0, 106.7 (d, *J*<sub>C-F</sub> = 25.3 Hz).

**<sup>19</sup>F NMR (376 MHz, Acetone-*d*6)** δ -59.07, -121.96.

**HRMS (ESI, TOF) m/z:** [M+H]<sup>+</sup> calcd for C<sub>18</sub>H<sub>12</sub>F<sub>4</sub>N<sub>2</sub>O 349.0959, found: 349.0948.

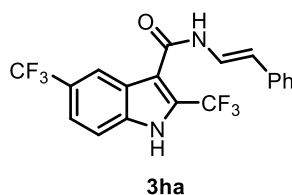

(*E*)-*N*-styryl-2,5-bis(trifluoromethyl)-1*H*-indole-3-carboxamide (**3ha**) was prepared from (*E*)-4-Phenyl-*N*-styrylbutanamide and (*E*)-3-(dimethyl(oxo)-λ<sup>6</sup>-sulfaneylidene)-1,1,1-trifluoro-*N*-(4-(trifluoromethyl)phenyl))propan-2-imine according to the General Procedure E (eluent: PE/EA = 3:1) in 83% yield (99 mg, 12 h).

**Physical state:** yellow oil.

**<sup>1</sup>H NMR (400 MHz, Acetone-*d*6)** δ 12.13 (s, 1H), 9.82 (d, *J* = 9.2 Hz, 1H), 8.25 (s, 1H), 7.87-7.77 (m, 2H), 7.67 (d, *J* = 8.7 Hz, 1H), 7.44 (d, *J* = 7.6 Hz, 2H), 7.32 (t, *J* = 7.6 Hz, 2H), 7.19 (t, *J* = 7.3 Hz, 1H), 6.51 (d, *J* = 14.8 Hz, 1H).

**<sup>13</sup>C NMR (100 MHz, Acetone-*d*6)** δ 160.5, 137.6, 137.5, 129.6, 127.7 (q, *J*<sub>C-F</sub> = 38.0 Hz), 127.3, 126.4, 125.9 (q, *J*<sub>C-F</sub> = 269.0 Hz), 125.3, 124.5 (q, *J*<sub>C-F</sub> = 32.0 Hz), 124.2, 122.4 (q, *J*<sub>C-F</sub> = 3.0 Hz), 121.7 (q, *J*<sub>C-F</sub> = 268.0 Hz), 120.1 (q, *J*<sub>C-F</sub> = 5.0 Hz), 115.1, 114.7, 114.3.

**<sup>19</sup>F NMR (376 MHz, Acetone-*d*6)** δ -53.96, -56.13.

**HRMS (ESI, TOF) m/z:** [M+Na]<sup>+</sup> calcd for C<sub>19</sub>H<sub>12</sub>F<sub>6</sub>N<sub>2</sub>O 421.0746, found: 421.0753.

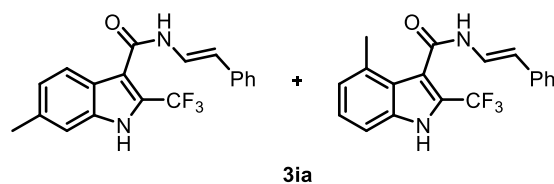

**(E)-6-methyl-N-styryl-2-(trifluoromethyl)-1H-indole-3-carboxamide** and **(E)-4-methyl-N-styryl-2-(trifluoromethyl)-1H-indole-3-carboxamide (3ia)** was prepared from *(E)*-4-Phenyl-*N*-styrylbutanamide and *(E)*-3-(dimethyl(oxo)- $\lambda^6$ -sulfaneylidene)-1,1,1-trifluoro-*N*-(*m*-tolyl)propan-2-imine according to the General Procedure E (eluent: PE/EA = 3:1) in 95% yield (98 mg).

**Physical state:** yellow oil.

**$^1\text{H}$  NMR (400 MHz,  $\text{CDCl}_3$ )**  $\delta$  10.08 (s, 1H), 9.63 (s, 1H), 8.10 (d,  $J = 9.9$  Hz, 1H), 8.00 (d,  $J = 10.2$  Hz, 1H), 7.74-7.65 (m, 3H), 7.29-7.22 (m, 7H), 7.21-7.15 (m, 2H), 7.14-7.11 (m, 2H), 7.08 (s, 1H), 7.04 (d,  $J = 8.4$  Hz, 1H), 6.91-6.85 (m, 1H), 6.21 (dd,  $J = 14.6, 3.6$  Hz, 2H), 2.46 (s, 2H), 2.33 (s, 3H).

**$^{13}\text{C}$  NMR (150 MHz,  $\text{CDCl}_3$ )**  $\delta$  162.7, 160.8, 136.0, 136.0, 135.8, 135.1, 135.0, 132.0, 129.0, 128.8, 128.7, 128.6, 127.1, 126.9, 125.9, 125.8, 125.7 (q,  $J_{\text{C-F}} = 43.8$  Hz), 125.2, 125.0, 124.9, 123.4, 123.3 (q,  $J_{\text{C-F}} = 253.7$  Hz), 123.2 (q,  $J_{\text{C-F}} = 37.8$  Hz), 122.3, 120.9 (q,  $J_{\text{C-F}} = 270.3$  Hz), 120.6, 114.5, 113.8, 113.4, 112.3, 111.6, 110.0, 21.8, 19.5.

**$^{19}\text{F}$  NMR (376 MHz,  $\text{CDCl}_3$ )**  $\delta$  -57.72, -58.36.

**HRMS (ESI, TOF)  $m/z$ :**  $[\text{M}+\text{H}]^+$  calcd for  $\text{C}_{19}\text{H}_{15}\text{F}_3\text{N}_2\text{O}$  345.1209, found: 345.1201.

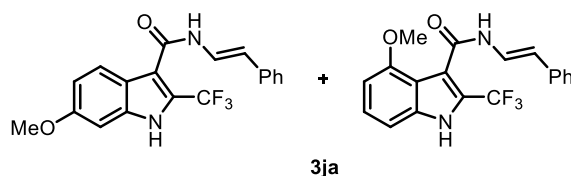

**(E)-6-methoxy-N-styryl-2-(trifluoromethyl)-1H-indole-3-carboxamide** and **(E)-4-methoxy-N-styryl-2-(trifluoromethyl)-1H-indole-3-carboxamide (3ja)** was prepared from *(E)*-4-Phenyl-*N*-styrylbutanamide and *(E)*-3-(dimethyl(oxo)- $\lambda^6$ -sulfaneylidene)-1,1,1-

trifluoro-*N*-(3-methoxyphenyl)propan-2-imine according to the General Procedure E (eluent: PE/EA = 3:1) in 84% yield (91 mg).

**Physical state:** yellow oil.

**<sup>1</sup>H NMR (400 MHz, Acetone-*d*6)** δ 10.69 (s, 1H), 10.49 (s, 1H), 10.17 (d, *J* = 10.2 Hz, 1H), 9.56 (d, *J* = 10.2 Hz, 1H), 7.86-7.73 (m, 3H), 7.43 (t, *J* = 7.2 Hz, 4H), 7.31 (t, *J* = 7.9 Hz, 4H), 7.24-7.15 (m, 4H), 7.03 (d, *J* = 2.2 Hz, 1H), 6.93 (dd, *J* = 8.9, 2.3 Hz, 1H), 6.79 (d, *J* = 7.8 Hz, 1H), 6.51 (d, *J* = 14.8 Hz, 1H), 6.41 (d, *J* = 14.8 Hz, 1H), 4.05 (s, 3H), 3.83 (s, 3H).

**<sup>13</sup>C NMR (100 MHz, Acetone-*d*6)** δ 161.3, 161.1, 159.5, 154.3, 138.0, 137.8, 137.6, 137.1, 129.5, 129.5, 127.4, 127.2, 127.0, 126.4 (q, *J*<sub>C-F</sub> = 49.0 Hz), 126.3, 126.2, 124.5, 124.4 (q, *J*<sub>C-F</sub> = 39.0 Hz), 124.3, 122.71, 122.2 (q, *J*<sub>C-F</sub> = 267.0 Hz), 122.1 (q, *J*<sub>C-F</sub> = 267.0 Hz), 120.1, 115.5, 114.2 (d, *J*<sub>C-F</sub> = 3.0 Hz), 114.0, 113.7, 113.5 (q, *J*<sub>C-F</sub> = 3.0 Hz), 112.9, 106.8, 103.0, 95.2, 56.4, 55.8.

**<sup>19</sup>F NMR (376 MHz, Acetone-*d*6)** δ -58.42, -59.05.

**HRMS (ESI, TOF) *m/z*:** [M+Na]<sup>+</sup> calcd for C<sub>19</sub>H<sub>15</sub>F<sub>3</sub>N<sub>2</sub>O<sub>2</sub> 383.0978, found: 383.0984.

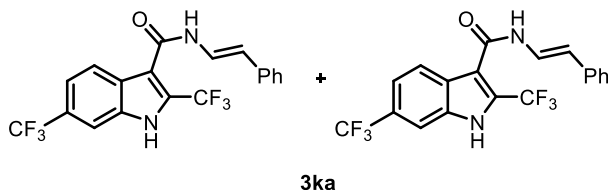

**(*E*)-*N*-styryl-2,6-bis(trifluoromethyl)-1*H*-indole-3-carboxamide and (*E*)-*N*-styryl-2,4-bis(trifluoromethyl)-1*H*-indole-3-carboxamide (3ka)** was prepared from (*E*)-4-Phenyl-*N*-styrylbutanamide and (*E*)-3-(dimethyl(oxo)-λ<sup>6</sup>-sulfaneylidene)-1,1,1-trifluoro-*N*-(3-(trifluoromethyl)phenyl)propan-2-imine according to the General Procedure E (eluent: PE/EA = 3:1) in 89% yield (106 mg, 24 h).

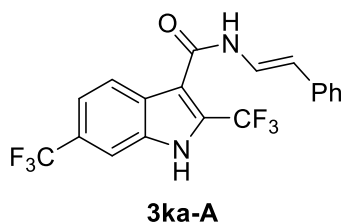

**(*E*)-*N*-styryl-2,6-bis(trifluoromethyl)-1*H*-indole-3-carboxamide (3ka-A)** (46%, 55 mg)

**Physical state:** yellow oil.

**<sup>1</sup>H NMR (400 MHz, CHCl<sub>3</sub>)** δ 10.49 (s, 1H), 8.06 (d, *J* = 10.4 Hz, 1H), 7.95 (d, *J* = 8.6 Hz, 1H), 7.70-7.61 (m, 2H), 7.39 (d, *J* = 8.6 Hz, 1H), 7.30-7.24 (m, 4H), 7.18 (t, *J* = 6.7 Hz, 1H), 6.28 (d, *J* = 14.6 Hz, 1H).

**<sup>13</sup>C NMR (100 MHz, CHCl<sub>3</sub>)** δ 160.4, 135.6, 133.5, 128.9, 127.8 (q, *J*<sub>C-F</sub> = 32.0 Hz), 127.7, 127.7 (q, *J*<sub>C-F</sub> = 39.0 Hz), 127.3, 125.9, 124.4 (q, *J*<sub>C-F</sub> = 270.0 Hz), 122.0, 121.9, 120.4 (q, *J*<sub>C-F</sub> = 268.0 Hz), 119.2 (d, *J*<sub>C-F</sub> = 4.0 Hz), 115.1, 111.8 (d, *J*<sub>C-F</sub> = 2.0 Hz), 110.5 (q, *J*<sub>C-F</sub> = 4.0 Hz).

**<sup>19</sup>F NMR (376 MHz, CHCl<sub>3</sub>)** δ -58.23, -61.59.

**HRMS (ESI, TOF) m/z:** [M+Na]<sup>+</sup> calcd for C<sub>19</sub>H<sub>12</sub>F<sub>6</sub>N<sub>2</sub>O 421.0746, found: 421.0751.

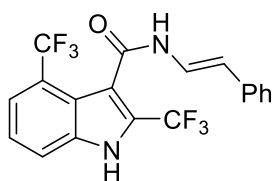

**3ka-B**

**(*E*)-*N*-styryl-2,4-bis(trifluoromethyl)-1*H*-indole-3-carboxamide (3ka-B)** (43%, 51 mg)

**Physical state:** yellow oil.

**<sup>1</sup>H NMR (400 MHz, CHCl<sub>3</sub>)** δ 11.20 (s, 1H), 7.83 (d, *J* = 10.8 Hz, 1H), 7.71 (dd, *J* = 14.4, 10.8 Hz, 1H), 7.57-7.52 (m, 2H), 7.35 (d, *J* = 7.6 Hz, 2H), 7.30 (t, *J* = 7.7 Hz, 3H), 7.21 (t, *J* = 7.2 Hz, 1H), 6.22 (d, *J* = 14.5 Hz, 1H).

**<sup>13</sup>C NMR (100 MHz, CHCl<sub>3</sub>)** δ 162.6, 136.0, 135.7, 128.8, 127.2, 126.0 (q, *J*<sub>C-F</sub> = 63.0 Hz), 126.0, 124.2, 123.0, 122.2 (q, *J*<sub>C-F</sub> = 33.0 Hz), 122.1, 120.7 (q, *J*<sub>C-F</sub> = 6.0 Hz), 120.2 (q, *J*<sub>C-F</sub> = 268.0 Hz), 119.3 (d, *J*<sub>C-F</sub> = 1.0 Hz), 117.2, 115.2, 111.6 (q, *J*<sub>C-F</sub> = 2.0 Hz).

**<sup>19</sup>F NMR (376 MHz, CHCl<sub>3</sub>)** δ -59.58, -59.88.

**HRMS (ESI, TOF) m/z:** [M+Na]<sup>+</sup> calcd for C<sub>19</sub>H<sub>12</sub>F<sub>6</sub>N<sub>2</sub>O 421.0746, found: 421.0751.

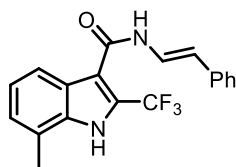

**3la**

**(*E*)-7-methyl-*N*-styryl-2-(trifluoromethyl)-1*H*-indole-3-carboxamide (3la)** was prepared from (*E*)-4-Phenyl-*N*-styrylbutanamide and (*E*)-3-(dimethyl(oxo)-λ<sup>6</sup>-sulfaneylidene)-1,1,1-

trifluoro-*N*-(*o*-tolyl)propan-2-imine according to the General Procedure E (eluent: PE/EA = 3:1) in 98% yield (101 mg).

**Physical state:** colorless oil.

**<sup>1</sup>H NMR (400 MHz, CDCl<sub>3</sub>)** δ 9.28 (s, 1H), 7.91 (d, *J* = 10.9 Hz, 1H), 7.81-7.68 (m, 2H), 7.37-7.26 (m, 4H), 7.25-7.16 (m, 3H), 6.24 (d, *J* = 14.6 Hz, 1H), 2.54 (s, 3H).

**<sup>13</sup>C NMR (100 MHz, CDCl<sub>3</sub>)** δ 160.6, 136.0, 134.3, 128.8, 126.9, 126.1, 125.7, 125.4 (q, *J*<sub>C-F</sub> = 38.4 Hz), 125.2, 123.2, 122.6, 122.2, 120.9 (q, *J*<sub>C-F</sub> = 270.7 Hz), 118.6, 113.8, 112.5, 16.7.

**<sup>19</sup>F NMR (376 MHz, CDCl<sub>3</sub>)** δ -57.78.

**HRMS (ESI, TOF) m/z:** [M+H]<sup>+</sup> calcd for C<sub>19</sub>H<sub>15</sub>F<sub>3</sub>N<sub>2</sub>O 345.1209, found: 345.1200.

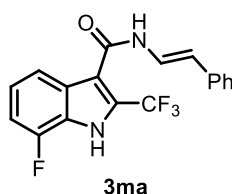

(*E*)-7-fluoro-*N*-styryl-2-(trifluoromethyl)-1*H*-indole-3-carboxamide (**3ma**) was prepared from (*E*)-4-Phenyl-*N*-styrylbutanamide and (*E*)-3-(dimethyl(oxo)-λ<sup>6</sup>-sulfaneylidene)-1,1,1-trifluoro-*N*-(2-fluorophenyl)propan-2-imine according to the General Procedure E (eluent: PE/EA = 3:1) in 72% yield (75 mg, 12 h).

**Physical state:** yellow solid.

**M.p.:** 170.3-171.9 °C.

**<sup>1</sup>H NMR (400 MHz, Acetone-*d*6)** δ 12.11 (s, 1H), 9.68 (s, 1H), 7.80 (dd, *J* = 14.7, 10.5 Hz, 1H), 7.67 (d, *J* = 8.1 Hz, 1H), 7.43 (d, *J* = 7.7 Hz, 2H), 7.32 (t, *J* = 7.6 Hz, 2H), 7.28-7.22 (m, 1H), 7.21-7.11 (m, 2H), 6.51 (d, *J* = 14.8 Hz, 1H).

**<sup>13</sup>C NMR (100 MHz, Acetone-*d*6)** δ 160.7, 150.5 (d, *J*<sub>C-F</sub> = 247.5 Hz), 137.7, 129.6, 129.4 (d, *J*<sub>C-F</sub> = 4.0 Hz), 127.3, 126.7 (q, *J*<sub>C-F</sub> = 40.5 Hz), 126.3, 124.2, 124.1, 123.2 (d, *J*<sub>C-F</sub> = 6.1 Hz), 121.7 (q, *J*<sub>C-F</sub> = 269.7 Hz), 118.0 (d, *J*<sub>C-F</sub> = 4.0 Hz), 115.1, 114.1, 110.4 (d, *J*<sub>C-F</sub> = 16.2 Hz).

**<sup>19</sup>F NMR (376 MHz, Acetone-*d*6)** δ -58.94, -133.42.

**HRMS (ESI, TOF) m/z:** [M+H]<sup>+</sup> calcd for C<sub>18</sub>H<sub>12</sub>F<sub>4</sub>N<sub>2</sub>O 349.0959, found: 349.0948.

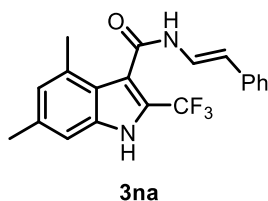

**(E)-4,6-dimethyl-N-styryl-2-(trifluoromethyl)-1H-indole-3-carboxamide (3na)** was prepared from (*E*)-4-Phenyl-*N*-styrylbutanamide and (*E*)-3-(dimethyl(oxo)- $\lambda^6$ -sulfaneylidene)-*N*-(3,5-dimethylphenyl)-1,1,1-trifluoropropan-2-imine according to the General Procedure E (eluent: PE/EA = 3:1) in 86% yield (92 mg).

**Physical state:** yellow oil.

**$^1\text{H}$  NMR (400 MHz, Acetone-*d*6)**  $\delta$  11.32 (s, 1H), 9.81 (s, 1H), 7.85-7.74 (m, 1H), 7.43 (d,  $J = 7.7$  Hz, 2H), 7.32 (t,  $J = 7.7$  Hz, 2H), 7.22-7.15 (m, 2H), 6.83 (s, 1H), 6.43 (d,  $J = 14.8$  Hz, 1H), 2.48 (s, 3H), 2.40 (s, 3H).

**$^{13}\text{C}$  NMR (100 MHz, Acetone-*d*6)**  $\delta$  163.4, 137.6, 137.0, 136.1, 132.0, 129.5, 127.3, 126.3, 125.5, 124.0, 123.0, 122.4 (q,  $J_{\text{C-F}} = 268.7$  Hz), 122.3 (q,  $J_{\text{C-F}} = 38.4$  Hz), 115.3, 113.9, 110.4, 21.7, 19.2.

**$^{19}\text{F}$  NMR (376 MHz, Acetone-*d*6)**  $\delta$  -58.95.

**HRMS (ESI, TOF)  $m/z$ :**  $[\text{M}+\text{H}]^+$  calcd for  $\text{C}_{20}\text{H}_{17}\text{F}_3\text{N}_2\text{O}$  359.1366, found: 359.1357.

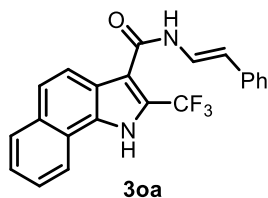

**(E)-N-styryl-2-(trifluoromethyl)-1H-benzo[g]indole-3-carboxamide (3oa)** was prepared from (*E*)-4-Phenyl-*N*-styrylbutanamide and (*E*)-3-(dimethyl(oxo)- $\lambda^6$ -sulfaneylidene)-1,1,1-trifluoro-*N*-(naphthalen-1-yl)propan-2-imine according to the General Procedure E (eluent: PE/EA = 3:1) in 97% yield (110 mg).

**Physical state:** yellow solid.

**M.p.:** 246.1-246.9°C.

**$^1\text{H}$  NMR (400 MHz, Acetone-*d*6)**  $\delta$  12.34 (s, 1H), 9.74 (d,  $J = 9.9$  Hz, 1H), 8.52 (d,  $J = 8.0$  Hz, 1H), 8.03 (d,  $J = 7.8$  Hz, 1H), 7.91-7.79 (m, 2H), 7.72 (d,  $J = 8.9$  Hz, 1H), 7.66-7.56 (m,



2H), 7.45 (d,  $J = 7.6$  Hz, 2H), 7.33 (t,  $J = 7.6$  Hz, 2H), 7.19 (t,  $J = 7.3$  Hz, 1H), 6.51 (d,  $J = 14.8$  Hz, 1H).

$^{13}\text{C}$  NMR (100 MHz, Acetone-*d*6)  $\delta$  161.3, 137.8, 132.6, 131.7, 129.6, 129.6, 127.4, 127.2, 126.7, 126.3, 124.4, 124.2, 124.0, 122.8, 122.5, 122.2 (q,  $J_{\text{C-F}} = 269.7$  Hz), 122.0, 120.4, 116.1, 113.8.

$^{19}\text{F}$  NMR (376 MHz, Acetone-*d*6)  $\delta$  -57.74.

HRMS (ESI, TOF)  $m/z$ :  $[\text{M}+\text{H}]^+$  calcd for  $\text{C}_{22}\text{H}_{15}\text{F}_3\text{N}_2\text{O}$  381.1209, found: 381.1202.

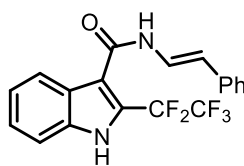

**3pa**

(*E*)-2-(perfluoroethyl)-*N*-styryl-1*H*-indole-3-carboxamide (**3pa**) was prepared from (*E*)-4-Phenyl-*N*-styrylbutanamide and (*E*)-1-(dimethyl(oxo)- $\lambda^6$ -sulfaneylidene)-3,3,4,4,4-pentafluoro-*N*-phenylbutan-2-imine according to the General Procedure E (eluent: PE/EA = 3:1) in 96% yield (109 mg).

**Physical state:** yellow solid.

**M.p.:** 88.7-89.6°C.

$^1\text{H}$  NMR (400 MHz,  $\text{CDCl}_3$ )  $\delta$  9.27 (s, 1H), 7.94 (d,  $J = 8.1$  Hz, 1H), 7.82-7.70 (m, 2H), 7.50 (d,  $J = 8.3$  Hz, 1H), 7.43-7.38 (m, 1H), 7.37-7.28 (m, 5H), 7.23-7.18 (m, 1H), 6.25-6.16 (m, 1H).

$^{13}\text{C}$  NMR (150 MHz,  $\text{CDCl}_3$ )  $\delta$  160.4, 135.9, 135.3, 128.9, 127.0, 126.2, 126.1, 125.8, 122.9, 122.5, 122.1 (t,  $J_{\text{C-F}} = 28.7$  Hz), 121.3, 119.8 (t,  $J_{\text{C-F}} = 39.3$  Hz), 117.9 (t,  $J_{\text{C-F}} = 39.3$  Hz), 115.0, 113.9, 112.3.

$^{19}\text{F}$  NMR (376 MHz,  $\text{CDCl}_3$ )  $\delta$  -84.02, -110.21.

HRMS (ESI, TOF)  $m/z$ :  $[\text{M}+\text{H}]^+$  calcd for  $\text{C}_{19}\text{H}_{13}\text{F}_5\text{N}_2\text{O}$  381.1021, found: 381.1023.

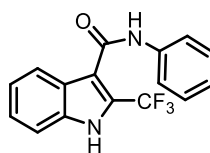

**3ab**

S25

*N*-phenyl-2-(trifluoromethyl)-1*H*-indole-3-carboxamide (**3ab**) was prepared from benzoyl azide and (*E*)-3-(dimethyl(oxo)- $\lambda^6$ -sulfaneylidene)-1,1,1-trifluoro-*N*-phenylpropan-2-imine according to the General Procedure E (eluent: PE/EA = 3:1) in 97% yield (88 mg).

**Physical state:** white solid.

**M.p.:** 177.4-178.3 °C.

**<sup>1</sup>H NMR (400 MHz, Acetone-*d*6)**  $\delta$  11.69 (s, 1H), 9.45 (s, 1H), 7.92-7.85 (m, 3H), 7.59 (d, *J* = 8.3 Hz, 1H), 7.42-7.36 (m, 3H), 7.31-7.25 (m, 1H), 7.17-7.12 (m, 1H).

**<sup>13</sup>C NMR (100 MHz, Acetone-*d*6)**  $\delta$  162.3, 140.2, 136.1, 129.6, 126.0, 125.9, 125.2 (q, *J*<sub>C-F</sub> = 38.4 Hz), 124.6, 122.6, 122.2 (q, *J*<sub>C-F</sub> = 269.7 Hz), 121.9, 120.7, 115.5 (q, *J*<sub>C-F</sub> = 3.0 Hz), 113.4.

**<sup>19</sup>F NMR (376 MHz, Acetone-*d*6)**  $\delta$  -58.75.

**HRMS (ESI, TOF) m/z:** [M+H]<sup>+</sup> calcd for C<sub>16</sub>H<sub>11</sub>F<sub>3</sub>N<sub>2</sub>O 305.0896, found: 305.0895.

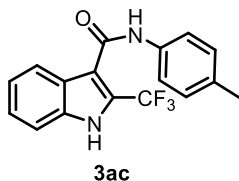

*N*-(*p*-tolyl)-2-(trifluoromethyl)-1*H*-indole-3-carboxamide (**3ac**) was prepared from 4-methylbenzoyl azide and (*E*)-3-(dimethyl(oxo)- $\lambda^6$ -sulfaneylidene)-1,1,1-trifluoro-*N*-phenylpropan-2-imine according to the General Procedure E (eluent: PE/EA = 3:1) in 96% yield (92 mg).

**Physical state:** colorless oil.

**<sup>1</sup>H NMR (400 MHz, CDCl<sub>3</sub>)**  $\delta$  10.17 (s, 1H), 7.93 (d, *J* = 7.9 Hz, 1H), 7.83 (s, 1H), 7.53 (d, *J* = 8.2 Hz, 2H), 7.36 (d, *J* = 7.9 Hz, 1H), 7.28-7.24 (m, 2H), 7.15 (d, *J* = 8.3 Hz, 2H), 2.32 (s, 3H).

**<sup>13</sup>C NMR (100 MHz, CDCl<sub>3</sub>)**  $\delta$  162.2, 135.0, 134.8, 134.7, 129.7, 125.4, 125.3 (q, *J*<sub>C-F</sub> = 38.4 Hz), 125.3, 122.5, 120.9 (q, *J*<sub>C-F</sub> = 270.7 Hz), 120.7, 120.7, 112.8, 112.6 (d, *J*<sub>C-F</sub> = 2.4 Hz), 20.8.

**<sup>19</sup>F NMR (376 MHz, CDCl<sub>3</sub>)**  $\delta$  -57.82.

**HRMS (ESI, TOF) m/z:** [M+H]<sup>+</sup> calcd for C<sub>17</sub>H<sub>13</sub>F<sub>3</sub>N<sub>2</sub>O 319.1053, found: 319.1058.

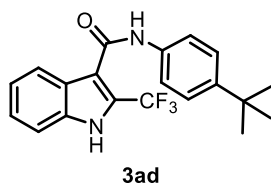

*N*-(4-(*tert*-butyl)phenyl)-2-(trifluoromethyl)-1*H*-indole-3-carboxamide (**3ad**) was prepared from 4-(*tert*-butyl)benzoyl azide and (*E*)-3-(dimethyl(oxo)- $\lambda^6$ -sulfaneylidene)-1,1,1-trifluoro-*N*-phenylpropan-2-imine according to the General Procedure E (eluent: PE/EA = 3:1) in 96% yield (104 mg).

**Physical state:** colorless oil.

**<sup>1</sup>H NMR (400 MHz, CDCl<sub>3</sub>)**  $\delta$  9.88 (s, 1H), 7.96 (d, *J* = 8.0 Hz, 1H), 7.80 (s, 1H), 7.58 (d, *J* = 8.7 Hz, 2H), 7.43-7.36 (m, 3H), 7.33-7.21 (m, 2H), 1.32 (s, 9H).

**<sup>13</sup>C NMR (100 MHz, CDCl<sub>3</sub>)**  $\delta$  162.2, 148.1, 135.0, 134.7, 126.1, 125.5, 125.4 (q, *J*<sub>C-F</sub> = 38.4 Hz), 125.3, 122.5, 120.9 (q, *J*<sub>C-F</sub> = 270.7 Hz), 120.7, 120.5, 112.9, 112.7 (d, *J*<sub>C-F</sub> = 2.0 Hz), 34.5, 31.4.

**<sup>19</sup>F NMR (376 MHz, CDCl<sub>3</sub>)**  $\delta$  -57.77.

**HRMS (ESI, TOF) m/z:** [M+H]<sup>+</sup> calcd for C<sub>20</sub>H<sub>19</sub>F<sub>3</sub>N<sub>2</sub>O 361.1522, found: 361.1524.

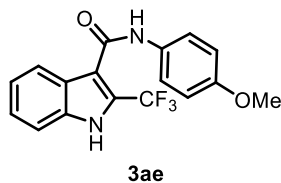

*N*-(4-methoxyphenyl)-2-(trifluoromethyl)-1*H*-indole-3-carboxamide (**3ae**) was prepared from 4-methoxybenzoyl azide and (*E*)-3-(dimethyl(oxo)- $\lambda^6$ -sulfaneylidene)-1,1,1-trifluoro-*N*-phenylpropan-2-imine according to the General Procedure E (eluent: PE/EA = 3:1) in 94% yield (94 mg).

**Physical state:** yellow oil.

**<sup>1</sup>H NMR (400 MHz, Acetone-*d*<sub>6</sub>)**  $\delta$  11.64 (s, 1H), 9.32 (s, 1H), 7.88 (d, *J* = 8.1 Hz, 1H), 7.80 (d, *J* = 8.9 Hz, 2H), 7.58 (d, *J* = 8.3 Hz, 1H), 7.38 (t, *J* = 7.6 Hz, 1H), 7.27 (t, *J* = 7.6 Hz, 1H), 6.98-6.92 (m, 2H), 3.80 (s, 3H).

**<sup>13</sup>C NMR (150 MHz, Acetone-*d*6)** δ 162.0, 157.2, 136.1, 133.3, 126.0, 125.9, 125.0 (q,  $J_{C-F}$  = 39.3 Hz), 122.6, 122.4, 122.2 (q,  $J_{C-F}$  = 270.3 Hz), 121.9, 115.6, 114.7, 113.4, 55.7.

**<sup>19</sup>F NMR (376 MHz, Acetone-*d*6)** δ -58.70.

**HRMS (ESI, TOF) m/z:** [M+H]<sup>+</sup> calcd for C<sub>17</sub>H<sub>13</sub>F<sub>3</sub>N<sub>2</sub>O<sub>2</sub> 335.1002, found: 335.0996.

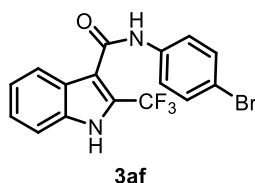

*N*-(4-bromophenyl)-2-(trifluoromethyl)-1*H*-indole-3-carboxamide (**3af**) was prepared from 4-bromobenzoyl azide and (*E*)-3-(dimethyl(oxo)-λ<sup>6</sup>-sulfaneylidene)-1,1,1-trifluoro-*N*-phenylpropan-2-imine according to the General Procedure E (eluent: PE/EA = 3:1) in 96% yield (110 mg).

**Physical state:** yellow oil.

**<sup>1</sup>H NMR (400 MHz, Acetone-*d*6)** δ 11.69 (s, 1H), 9.56 (s, 1H), 7.87 (dd,  $J$  = 8.5, 3.1 Hz, 3H), 7.60 (d,  $J$  = 8.3 Hz, 1H), 7.55 (d,  $J$  = 8.6 Hz, 2H), 7.39 (t,  $J$  = 7.7 Hz, 1H), 7.28 (t,  $J$  = 7.6 Hz, 1H).

**<sup>13</sup>C NMR (100 MHz, Acetone-*d*6)** δ 162.3, 139.6, 136.0, 132.5, 126.0, 125.9, 125.4 (q,  $J_{C-F}$  = 39.4 Hz), 122.7, 122.5, 122.1 (q,  $J_{C-F}$  = 269.7 Hz), 121.9, 116.6, 115.1 (d,  $J_{C-F}$  = 2.6 Hz), 113.5.

**<sup>19</sup>F NMR (376 MHz, Acetone-*d*6)** δ -58.84.

**HRMS (ESI, TOF) m/z:** [M+H]<sup>+</sup> calcd for C<sub>16</sub>H<sub>10</sub>BrF<sub>3</sub>N<sub>2</sub>O 383.0002, found: 382.9995.

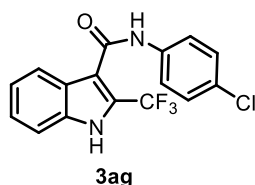

*N*-(4-chlorophenyl)-2-(trifluoromethyl)-1*H*-indole-3-carboxamide (**3ag**) was prepared from 4-chlorobenzoyl azide and (*E*)-3-(dimethyl(oxo)-λ<sup>6</sup>-sulfaneylidene)-1,1,1-trifluoro-*N*-phenylpropan-2-imine according to the General Procedure E (eluent: PE/EA = 3:1) in 89% yield (90 mg).

**Physical state:** colorless oil.

**<sup>1</sup>H NMR (400 MHz, Acetone-*d*6)** δ 11.71 (s, 1H), 9.58 (s, 1H), 7.95-7.84 (m, 3H), 7.60 (d, *J* = 8.3 Hz, 1H), 7.45-7.36 (m, 3H), 7.31-7.24 (m, 1H), .

**<sup>13</sup>C NMR (100 MHz, Acetone-*d*6)** δ 162.3, 139.6, 136.0, 132.5, 126.0, 125.9, 125.4 (q, *J*<sub>C-F</sub> = 39.4 Hz), 122.7, 122.5, 121.9, 122.1 (q, *J*<sub>C-F</sub> = 269.7 Hz), 116.6, 115.1 (d, *J*<sub>C-F</sub> = 3.0 Hz), 113.5.

**<sup>19</sup>F NMR (376 MHz, Acetone-*d*6)** δ -58.81.

**HRMS (ESI, TOF) m/z:** [M+H]<sup>+</sup> calcd for C<sub>16</sub>H<sub>10</sub>ClF<sub>3</sub>N<sub>2</sub>O 339.0507, found: 339.0501.

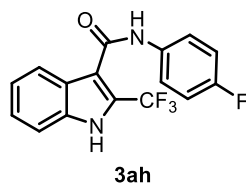

***N*-(4-fluorophenyl)-2-(trifluoromethyl)-1*H*-indole-3-carboxamide (3ah)** was prepared from 4-fluorobenzoyl azide and (*E*)-3-(dimethyl(oxo)-λ<sup>6</sup>-sulfaneylidene)-1,1,1-trifluoro-*N*-phenylpropan-2-imine according to the General Procedure E (eluent: PE/EA = 3:1) in 97% yield (94 mg).

**Physical state:** yellow solid.

**M.p.:** 146.2-147.1 °C.

**<sup>1</sup>H NMR (400 MHz, Acetone-*d*6)** δ 11.73 (s, 1H), 9.53 (s, 1H), 7.95-7.83 (m, 3H), 7.59 (d, *J* = 8.3 Hz, 1H), 7.38 (t, *J* = 7.6 Hz, 1H), 7.27 (t, *J* = 7.3 Hz, 1H), 7.20-7.12 (m, 2H).

**<sup>13</sup>C NMR (100 MHz, Acetone-*d*6)** δ 162.2, 159.9 (d, *J*<sub>C-F</sub> = 241.4 Hz), 136.4 (d, *J*<sub>C-F</sub> = 3.0 Hz), 135.9, 125.9, 125.9, 125.1 (q, *J*<sub>C-F</sub> = 39.4 Hz), 122.7, 122.5 (d, *J*<sub>C-F</sub> = 8.1 Hz), 122.1 (q, *J*<sub>C-F</sub> = 270.7 Hz), 121.9, 116.0 (d, *J*<sub>C-F</sub> = 22.2 Hz), 115.1 (q, *J*<sub>C-F</sub> = 3.0 Hz), 113.4.

**<sup>19</sup>F NMR (376 MHz, Acetone-*d*6)** δ -58.76, -120.18.

**HRMS (ESI, TOF) m/z:** [M+H]<sup>+</sup> calcd for C<sub>16</sub>H<sub>10</sub>F<sub>4</sub>N<sub>2</sub>O 323.0802, found: 323.0799.

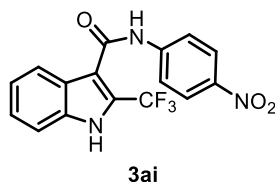

***N*-(4-nitrophenyl)-2-(trifluoromethyl)-1*H*-indole-3-carboxamide (3ai)** was prepared from 4-nitrobenzoyl azide and (*E*)-3-(dimethyl(oxo)-λ<sup>6</sup>-sulfaneylidene)-1,1,1-trifluoro-*N*-

phenylpropan-2-imine according to the General Procedure E (eluent: PE/EA = 3:1) in 97% yield (101 mg).

**Physical state:** white solid.

**M.p.:** 201.5-202.4 °C.

**<sup>1</sup>H NMR (400 MHz, Acetone-*d*6)** δ 11.82 (s, 1H), 10.02 (s, 1H), 8.30 (d, *J* = 9.3 Hz, 2H), 8.19-8.11 (m, 2H), 7.90 (d, *J* = 8.3 Hz, 1H), 7.62 (d, *J* = 8.4 Hz, 1H), 7.42 (t, *J* = 7.5 Hz, 1H), 7.34-7.27 (m, 1H).

**<sup>13</sup>C NMR (100 MHz, Acetone-*d*6)** δ 162.8, 146.1, 144.1, 136.0, 126.1, 126.0 (q, *J*<sub>C-F</sub> = 38.4 Hz), 125.7, 125.6, 123.0, 122.0 (q, *J*<sub>C-F</sub> = 269.7 Hz), 121.9, 120.3, 114.4 (d, *J*<sub>C-F</sub> = 2.0 Hz), 113.6.

**<sup>19</sup>F NMR (376 MHz, Acetone-*d*6)** δ -58.81.

**HRMS (ESI, TOF) m/z:** [M+H]<sup>+</sup> calcd for C<sub>16</sub>H<sub>10</sub>F<sub>3</sub>N<sub>3</sub>O<sub>3</sub> 350.0747, found: 350.0744.

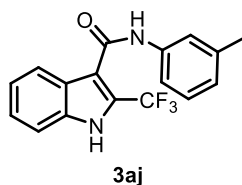

*N*-(*m*-tolyl)-2-(trifluoromethyl)-1*H*-indole-3-carboxamide (**3aj**) was prepared from 3-methylbenzoyl azide and (*E*)-3-(dimethyl(oxo)-λ<sup>6</sup>-sulfaneylidene)-1,1,1-trifluoro-*N*-phenylpropan-2-imine according to the General Procedure E (eluent: PE/EA = 3:1) in 98% yield (93 mg).

**Physical state:** colorless oil.

**<sup>1</sup>H NMR (400 MHz, Acetone-*d*6)** δ 11.74 (s, 1H), 9.41 (s, 1H), 7.88 (d, *J* = 8.1 Hz, 1H), 7.76 (s, 1H), 7.70 (d, *J* = 7.4 Hz, 1H), 7.59 (d, *J* = 8.3 Hz, 1H), 7.38 (t, *J* = 7.3 Hz, 1H), 7.31-7.23 (m, 2H), 6.97 (d, *J* = 7.5 Hz, 1H), 2.35 (s, 3H).

**<sup>13</sup>C NMR (100 MHz, Acetone-*d*6)** δ 162.4, 140.1, 139.2, 136.1, 129.5, 126.0, 125.9, 125.4, 125.1 (q, *J*<sub>C-F</sub> = 38.4 Hz), 122.6, 122.2 (q, *J*<sub>C-F</sub> = 269.7 Hz), 121.8, 121.3, 117.9, 115.4 (q, *J*<sub>C-F</sub> = 2.0 Hz), 113.4, 21.6.

**<sup>19</sup>F NMR (376 MHz, Acetone-*d*6)** δ -58.64.

**HRMS (ESI, TOF) m/z:** [M+H]<sup>+</sup> calcd for C<sub>17</sub>H<sub>13</sub>F<sub>3</sub>N<sub>2</sub>O 319.1053, found: 319.1056.

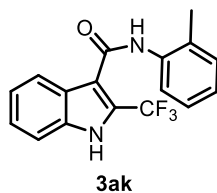

*N*-(*o*-tolyl)-2-(trifluoromethyl)-1*H*-indole-3-carboxamide (**3ak**) was prepared from 2-methylbenzoyl azide and (*E*)-3-(dimethyl(oxo)- $\lambda^6$ -sulfaneylidene)-1,1,1-trifluoro-*N*-phenylpropan-2-imine according to the General Procedure E (eluent: PE/EA = 3:1) in 69% yield (66 mg).

**Physical state:** colorless oil.

**<sup>1</sup>H NMR (400 MHz, Acetone-*d*6)**  $\delta$  11.64 (s, 1H), 8.83 (s, 1H), 8.01 (d, *J* = 8.1 Hz, 1H), 7.83 (d, *J* = 7.9 Hz, 1H), 7.59 (d, *J* = 8.3 Hz, 1H), 7.40 (t, *J* = 7.6 Hz, 1H), 7.33-7.22 (m, 3H), 7.14 (t, *J* = 7.4 Hz, 1H), 2.42 (s, 3H).

**<sup>13</sup>C NMR (100 MHz, Acetone-*d*6)**  $\delta$  162.4, 137.6, 136.1, 132.5, 131.3, 127.1, 126.3, 126.3, 125.9, 125.4, 125.1 (q, *J*<sub>C-F</sub> = 38.4 Hz), 122.7, 122.2 (q, *J*<sub>C-F</sub> = 269.7 Hz), 121.9, 115.3, 113.5, 18.4.

**<sup>19</sup>F NMR (376 MHz, Acetone-*d*6)**  $\delta$  -58.47.

**HRMS (ESI, TOF) m/z:** [M+H]<sup>+</sup> calcd for C<sub>17</sub>H<sub>13</sub>F<sub>3</sub>N<sub>2</sub>O 319.1053, found: 319.1052.

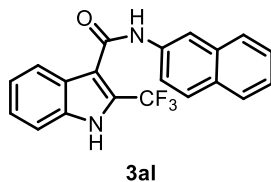

*N*-(naphthalen-2-yl)-2-(trifluoromethyl)-1*H*-indole-3-carboxamide (**3al**) was prepared from 2-naphthoyl azide and (*E*)-3-(dimethyl(oxo)- $\lambda^6$ -sulfaneylidene)-1,1,1-trifluoro-*N*-phenylpropan-2-imine according to the General Procedure E (eluent: PE/EA = 3:1) in 95% yield (101 mg).

**Physical state:** yellow oil.

**<sup>1</sup>H NMR (400 MHz, CDCl<sub>3</sub>)**  $\delta$  9.83 (s, 1H), 8.33 (d, *J* = 2.1 Hz, 1H), 8.04-7.94 (m, 2H), 7.83-7.72 (m, 3H), 7.75 (dd, *J* = 8.8, 2.1 Hz, 1H), 7.49-7.36 (m, 3H), 7.33-7.24 (m, 2H).

$^{13}\text{C}$  NMR (100 MHz,  $\text{CDCl}_3$ )  $\delta$  162.2, 135.1, 134.6, 133.8, 131.0, 129.0, 127.8, 127.7, 126.7, 125.5, 125.4 (q,  $J_{\text{C-F}} = 38.4$  Hz), 125.3, 122.7, 120.8 (q,  $J_{\text{C-F}} = 270.7$  Hz), 120.7, 120.3, 117.5, 112.8.

$^{19}\text{F}$  NMR (376 MHz,  $\text{CDCl}_3$ )  $\delta$  -57.66.

HRMS (ESI, TOF)  $m/z$ :  $[\text{M}+\text{H}]^+$  calcd for  $\text{C}_{20}\text{H}_{13}\text{F}_3\text{N}_2\text{O}$  355.1053, found: 355.1060.

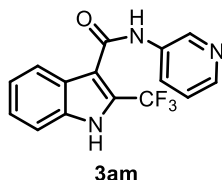

*N*-(pyridin-3-yl)-2-(trifluoromethyl)-1*H*-indole-3-carboxamide (**3am**) was prepared from nicotinoyl azide and (*E*)-3-(dimethyl(oxo)- $\lambda^6$ -sulfaneylidene)-1,1,1-trifluoro-*N*-phenylpropan-2-imine according to the General Procedure E (eluent: PE/EA = 3:1) in 76% yield (70 mg).

**Physical state:** white solid.

**M.p.:** 252.1-252.9°C.

$^1\text{H}$  NMR (400 MHz, Acetone-*d*6)  $\delta$  11.83 (s, 1H), 9.65 (s, 1H), 9.00 (s, 1H), 8.36 (d,  $J = 5.3$  Hz, 2H), 7.92 (d,  $J = 8.2$  Hz, 1H), 7.61 (d,  $J = 8.3$  Hz, 1H), 7.40 (t,  $J = 6.7$  Hz, 2H), 7.29 (t,  $J = 7.6$  Hz, 1H).

$^{13}\text{C}$  NMR (150 MHz, Acetone-*d*6)  $\delta$  162.6, 145.7, 142.5, 136.9, 136.1, 127.5, 126.1, 125.9, 125.6 (q,  $J_{\text{C-F}} = 39.3$  Hz), 124.3, 122.8, 122.1 (q,  $J_{\text{C-F}} = 270.3$  Hz), 122.0, 114.8, 113.5.

$^{19}\text{F}$  NMR (376 MHz, Acetone-*d*6)  $\delta$  -58.91.

HRMS (ESI, TOF)  $m/z$ :  $[\text{M}+\text{H}]^+$  calcd for  $\text{C}_{15}\text{H}_{10}\text{F}_3\text{N}_3\text{O}$  306.0849, found: 306.0843.

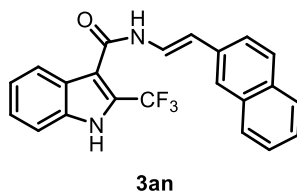

(*E*)-*N*-(2-(naphthalen-2-yl)vinyl)-2-(trifluoromethyl)-1*H*-indole-3-carboxamide (**3an**) was prepared from (*E*)-3-(naphthalen-2-yl)acryloyl azide and (*E*)-3-(dimethyl(oxo)- $\lambda^6$ -sulfaneylidene)-1,1,1-trifluoro-*N*-phenylpropan-2-imine according to the General Procedure E (eluent: PE/EA = 3:1) in 81% yield (92 mg).



**Physical state:** yellow oil.

**<sup>1</sup>H NMR (400 MHz, Acetone-*d*6)** δ 11.84 (s, 1H), 9.75 (d, *J* = 10.4 Hz, 1H), 7.99 (dd, *J* = 14.7, 10.2 Hz, 1H), 7.94-7.76 (m, 5H), 7.72 (d, *J* = 8.6 Hz, 1H), 7.62 (d, *J* = 8.3 Hz, 1H), 7.51-7.36 (m, 3H), 7.30 (t, *J* = 7.6 Hz, 1H), 6.71 (d, *J* = 14.7 Hz, 1H).

**<sup>13</sup>C NMR (150 MHz, Acetone-*d*6)** δ 161.2, 136.1, 135.4, 134.9, 133.4, 129.2, 128.5, 128.4, 127.1, 126.2, 126.0, 125.9 (q, *J*<sub>C-F</sub> = 40.8 Hz), 125.9, 125.4, 124.9, 124.0, 122.8, 122.1 (q, *J*<sub>C-F</sub> = 270.3 Hz), 122.0, 114.0, 113.8, 113.6.

**<sup>19</sup>F NMR (376 MHz, Acetone-*d*6)** δ 118.74.

**HRMS (ESI, TOF) m/z:** [M+H]<sup>+</sup> calcd for C<sub>22</sub>H<sub>15</sub>F<sub>3</sub>N<sub>2</sub>O 381.1209, found: 381.1200.

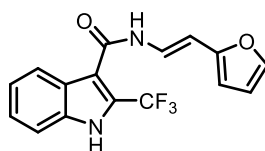

**3ao**

**(*E*)-*N*-(2-(furan-2-yl)vinyl)-2-(trifluoromethyl)-1*H*-indole-3-carboxamide (3ao)** was prepared from (*E*)-3-(furan-2-yl)acryloyl azide and (*E*)-3-(dimethyl(oxo)-λ<sup>6</sup>-sulfaneylidene)-1,1,1-trifluoro-*N*-phenylpropan-2-imine according to the General Procedure E (eluent: PE/EA = 3:1) in 85% yield (82 mg).

**Physical state:** yellow oil.

**<sup>1</sup>H NMR (400 MHz, CDCl<sub>3</sub>)** δ 10.05 (s, 1H), 7.98 (d, *J* = 10.8 Hz, 1H), 7.81 (d, *J* = 8.0 Hz, 1H), 7.61 (dd, *J* = 14.5, 10.8 Hz, 1H), 7.38 (d, *J* = 8.2 Hz, 1H), 7.27-7.15 (m, 3H), 6.31 (s, 1H), 6.12 (dd, *J* = 8.9, 5.6 Hz, 2H).

**<sup>13</sup>C NMR (100 MHz, CDCl<sub>3</sub>)** δ 160.8, 151.4, 141.6, 134.6, 125.7 (q, *J*<sub>C-F</sub> = 38.4 Hz), 125.5, 125.4, 122.8, 121.8, 120.8, 120.7 (q, *J*<sub>C-F</sub> = 270.7 Hz), 112.8, 111.5, 106.7, 103.4.

**<sup>19</sup>F NMR (376 MHz, CDCl<sub>3</sub>)** δ -57.90.

**HRMS (ESI, TOF) m/z:** [M+H]<sup>+</sup> calcd for C<sub>16</sub>H<sub>11</sub>F<sub>3</sub>N<sub>2</sub>O<sub>2</sub> 321.0846, found: 321.0839.

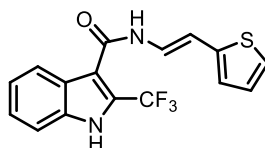

**3ap**

**(E)-N-(2-(thiophen-2-yl)vinyl)-2-(trifluoromethyl)-1H-indole-3-carboxamide (3ap)** was prepared from *(E)*-3-(thiophen-2-yl)acryloyl azide and *(E)*-3-(dimethyl(oxo)- $\lambda^6$ -sulfaneylidene)-1,1,1-trifluoro-*N*-phenylpropan-2-imine according to the General Procedure E (eluent: PE/EA = 3:1) in 88% yield (89 mg).

**Physical state:** yellow oil.

**<sup>1</sup>H NMR (400 MHz, CDCl<sub>3</sub>)**  $\delta$  10.17 (s, 1H), 8.04 (d,  $J$  = 10.6 Hz, 1H), 7.86 (d,  $J$  = 8.0 Hz, 1H), 7.59 (dd,  $J$  = 14.3, 10.7 Hz, 1H), 7.43 (d,  $J$  = 8.2 Hz, 1H), 7.32-7.22 (m, 2H), 7.10 (d,  $J$  = 5.0 Hz, 1H), 6.96-6.87 (m, 2H), 6.46 (d,  $J$  = 14.5 Hz, 1H).

**<sup>13</sup>C NMR (150 MHz, CDCl<sub>3</sub>)**  $\delta$  160.8, 140.3, 134.6, 127.5, 125.7 (q,  $J_{C-F}$  = 39.3 Hz), 125.6, 125.4, 124.7, 123.4, 122.8, 122.1, 120.8, 120.7 (q,  $J_{C-F}$  = 270.3 Hz), 112.8, 111.5, 108.1.

**<sup>19</sup>F NMR (376 MHz, CDCl<sub>3</sub>)**  $\delta$  -57.82.

**HRMS (ESI, TOF) m/z:** [M+H]<sup>+</sup> calcd for C<sub>16</sub>H<sub>11</sub>F<sub>3</sub>N<sub>2</sub>OS 337.0617, found: 337.0610.

### 3. Scale-up reactions

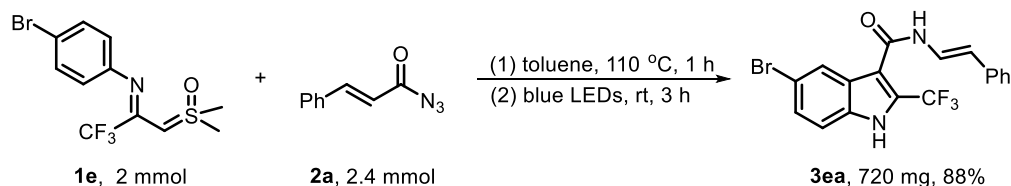

A dried 50 mL Schlenk tube was charged with azide **2a** (2.4 mmol, 1.2 equiv) in Toluene (20.0 mL). The reaction mixture was stirred in a preheated oil bath at 110 °C for 1 h. Then cooled at room temperature, **1e** (2.0 mmol) was added. The reaction mixture was irradiation by blue LEDs at room temperature for 3 h under nitrogen atmosphere. After reaction finished, the reaction solution was evaporated under reduced pressure and purified by column chromatography (PE/EA = 3:1) to afford the pure product **3ea** (720 mg, 88%).

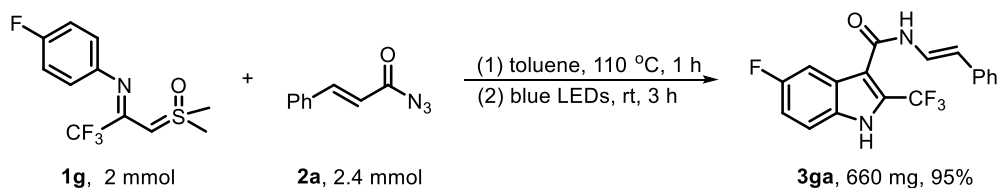

A dried 50 mL Schlenk tube was charged with azide **2a** (2.4 mmol, 1.2 equiv) in toluene (20.0 mL). The reaction mixture was stirred in a preheated oil bath at 110 °C for 1 h. Then cooled at room temperature, **1g** (2.0 mmol) was added. The reaction mixture was irradiation by blue LEDs at room temperature for 3 h under nitrogen atmosphere. After reaction finished, the reaction solution was evaporated under reduced pressure and purified by column chromatography (PE/EA = 3:1) to afford the pure product **3ga** (660 mg, 95%).

#### 4. Synthetic transformations

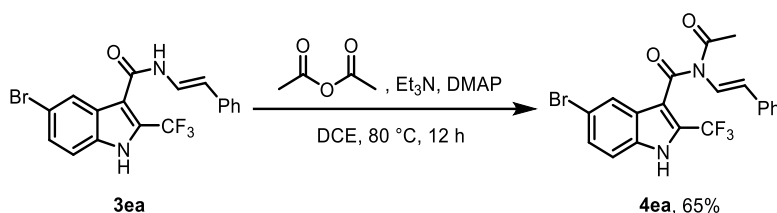

**(E)-N-acetyl-5-bromo-N-styryl-2-(trifluoromethyl)-1H-indole-3-carboxamide (4ea).** In a dried 10 mL Schlenk tube, add acetic anhydride (5 equiv), Et<sub>3</sub>N (5 equiv) and DMAP (0.5 equiv) to a solution of **3ea** (0.1 mmol) in DCE (1 mL). Stir the reaction mixture was stirred in a preheated oil bath at 80 °C for 12 h under nitrogen atmosphere. After reaction finished, the reaction solution was evaporated under reduced pressure and purified by column chromatography (PE/EA = 3:1) to afford the pure product **4ea** (29 mg, 65%).

**Physical state:** colorless oil.

**<sup>1</sup>H NMR (400 MHz, Acetone-*d*6)** δ 12.17 (s, 1H), 8.03 (d, *J* = 1.3 Hz, 1H), 7.57-7.48 (m, 2H), 7.36 (d, *J* = 14.6 Hz, 1H), 7.23 (d, *J* = 4.4 Hz, 4H), 7.21-7.14 (m, 1H), 6.24 (d, *J* = 14.7 Hz, 1H), 2.43 (s, 3H).

**<sup>13</sup>C NMR (150 MHz, Acetone-*d*6)** δ 171.3, 166.2, 136.1, 134.6, 132.3 (q, *J*<sub>C-F</sub> = 187.2 Hz), 129.5, 129.4, 128.6, 127.2, 127.0, 126.2, 125.1, 124.2, 121.5 (q, *J*<sub>C-F</sub> = 268.8 Hz), 117.0, 116.0, 115.9, 24.5.

**<sup>19</sup>F NMR (376 MHz, Acetone-*d*6)** δ -59.95.

**HRMS (ESI, TOF) *m/z*:** [M+H]<sup>+</sup> calcd for C<sub>20</sub>H<sub>14</sub>BrF<sub>3</sub>N<sub>2</sub>O<sub>2</sub> 451.0264, found: 451.0259.

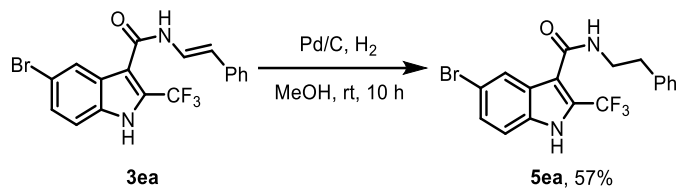

**5-bromo-*N*-phenethyl-2-(trifluoromethyl)-1*H*-indole-3-carboxamide (5ea).** In a dried 10 mL Schlenk tube, a stirred suspension of compound **3ea** (0.2 mmol, 1.0 equiv) in MeOH (2.0 mL) and palladium on activated carbon (10 mol%) was added. The reaction mixture was stirred under H<sub>2</sub> atmosphere at room temperature for 10 h. The mixture was filtered over SiO<sub>2</sub> and the solvent was removed under reduced pressure. The residue was purified by flash chromatography (eluent: PE/EA = 3:1) to afford **5ea** (46 mg, 57% yield).

**Physical state:** yellow oil.

**<sup>1</sup>H NMR (400 MHz, Acetone-*d*<sub>6</sub>)** δ 11.60 (s, 1H), 7.67 (d, *J* = 8.2 Hz, 1H), 7.54 (d, *J* = 8.3 Hz, 1H), 7.43 (s, 1H), 7.34-7.31 (m, 4H), 7.26-7.20 (m, 1H), 7.20-7.15 (m, 1H), 3.74 (q, *J* = 6.7 Hz, 2H), 3.01 (t, *J* = 7.4 Hz, 2H).

**<sup>13</sup>C NMR (150 MHz, Acetone-*d*<sub>6</sub>)** δ 163.6, 140.5, 136.0, 129.7, 129.3, 127.0, 126.0, 125.7, 125.0 (q, *J*<sub>C-F</sub> = 37.8 Hz), 122.3, 122.2 (q, *J*<sub>C-F</sub> = 270.3 Hz), 122.0, 115.3 (q, *J*<sub>C-F</sub> = 3.0 Hz), 113.3, 41.9, 36.3.

**<sup>19</sup>F NMR (376 MHz, Acetone-*d*<sub>6</sub>)** δ -58.60.

**HRMS (ESI, TOF) m/z:** [M+H]<sup>+</sup> calcd for C<sub>18</sub>H<sub>14</sub>BrF<sub>3</sub>N<sub>2</sub>O 411.0315, found: 411.0323.

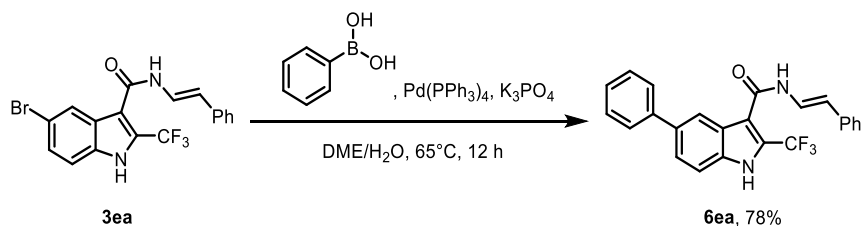

**(*E*)-5-phenyl-*N*-styryl-2-(trifluoromethyl)-1*H*-indole-3-carboxamide (6ea).** In a dried 10 mL Schlenk tube, add phenylboronic acid (1.2 equiv), Pd(PPh<sub>3</sub>)<sub>4</sub> (3 mol%) and K<sub>3</sub>PO<sub>4</sub> (2.0 equiv) to a solution of **3ea** (0.1 mmol) in DME/H<sub>2</sub>O (1 mL). Stir the reaction mixture was stirred in a preheated oil bath at 65 °C for 12 h under nitrogen atmosphere. After reaction finished, the reaction solution was evaporated under reduced pressure and purified by column chromatography (PE/EA = 3:1) to afford the pure product **6ea** (32 mg, 78%).

**Physical state:** yellow oil.

**<sup>1</sup>H NMR (400 MHz, Acetone-*d*6)** δ 11.79 (s, 1H), 9.74 (s, 1H), 8.09 (s, 1H), 7.90-7.79 (m, 1H), 7.74-7.67 (m, 4H), 7.50-7.40 (m, 4H), 7.39-7.28 (m, 3H), 7.18 (t, *J* = 7.3 Hz, 1H), 6.53 (d, *J* = 14.8 Hz, 1H).

**<sup>13</sup>C NMR (100 MHz, Acetone-*d*6)** δ 161.1, 142.3, 137.8, 136.1, 135.5, 129.7, 129.5, 128.1, 127.8, 127.2, 126.7 (q, *J*<sub>C-F</sub> = 39.4 Hz), 126.3, 125.7, 124.4, 122.0 (q, *J*<sub>C-F</sub> = 269.7 Hz), 121.1, 120.1, 114.3, 114.0, 113.8.

**<sup>19</sup>F NMR (376 MHz, Acetone-*d*6)** δ -58.84.

**HRMS (ESI, TOF) m/z:** [M+H]<sup>+</sup> calcd for C<sub>24</sub>H<sub>17</sub>F<sub>3</sub>N<sub>2</sub>O 407.1366, found: 407.1368.

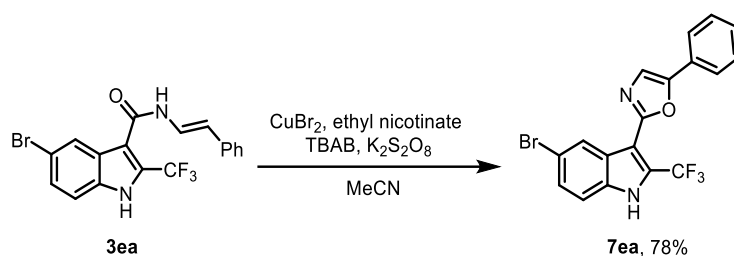

**2-(5-bromo-2-(trifluoromethyl)-1H-indol-3-yl)-5-phenyloxazole (7ea).** In a dried 10 mL Schlenk tube, add tetrabutylammonium bromide (TBAB, 1.2 equiv), K<sub>2</sub>S<sub>2</sub>O<sub>8</sub> (1.3 equiv), CuBr<sub>2</sub> (0.075 equiv), ethyl nicotinate (1.5 equiv) to a solution of **3ea** (0.1 mmol) in MeCN (2 mL) under argon atmosphere. Stir the reaction mixture was stirred in a preheated oil bath at 80 °C for 12 h under nitrogen atmosphere. After reaction finished, the reaction solution was evaporated under reduced pressure and purified by column chromatography (PE/EA = 3:1) to afford the pure product **7ea** (32 mg, 78%).

**Physical state:** yellow oil.

**<sup>1</sup>H NMR (600 MHz, Acetone-*d*6)** δ 12.12 (s, 1H), 8.71 (d, *J* = 2.0 Hz, 1H), 7.83 (d, *J* = 7.5 Hz, 2H), 7.79 (s, 1H), 7.60 (d, *J* = 8.7 Hz, 1H), 7.56-7.49 (m, 3H), 7.39 (t, *J* = 7.4 Hz, 1H).

**<sup>13</sup>C NMR (150 MHz, Acetone-*d*6)** δ 156.6, 151.5, 134.9, 130.0, 129.4, 129.3, 128.8, 127.8, 125.7 (q, *J*<sub>C-F</sub> = 40.8 Hz), 125.7, 124.8, 124.5, 122.1 (q, *J*<sub>C-F</sub> = 268.8 Hz), 116.2, 115.6, 104.7.

**<sup>19</sup>F NMR (376 MHz, Acetone-*d*6)** δ 117.42.

**HRMS (ESI, TOF) m/z:** [M+H]<sup>+</sup> calcd for C<sub>18</sub>H<sub>10</sub>BrF<sub>3</sub>N<sub>2</sub>O 407.0002, found: 406.9996.

## 5. Control experiments

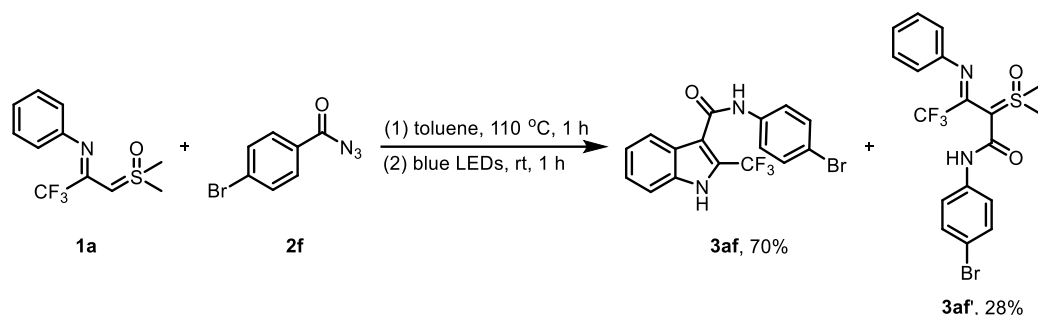

A dried 10 mL Schlenk tube was charged with azide **2f** (0.36 mmol, 1.2 equiv) and toluene (3.0 mL) under nitrogen atmosphere. The reaction mixture was stirred in a preheated oil bath at 110 °C for 1 h. Then cooled at room temperature, **1a** (0.3 mmol) was added. The reaction mixture was irradiation by blue LEDs at room temperature for 1 h under nitrogen atmosphere. After reaction finished, the reaction solution was evaporated under reduced pressure and purified by column chromatography (PE/EA = 3:1) to afford the product **3af** (81 mg, 70%) and **3af\*** (39 mg, 28%).

**(E)-N-(4-bromophenyl)-2-(dimethyl(oxo)-λ<sup>6</sup>-sulfaneylidene)-4,4,4-trifluoro-3-(phenylimino)butanamide (3af\*).**

**Physical state:** yellow oil.

**<sup>1</sup>H NMR (400 MHz, CDCl<sub>3</sub>)** δ 7.92 (s, 1H), 7.57 (d, *J* = 8.7 Hz, 2H), 7.41-7.34 (m, 4H), 7.20-7.12 (m, 1H), 7.07 (d, *J* = 7.9 Hz, 2H), 3.22 (s, 6H).

**<sup>13</sup>C NMR (150 MHz, CDCl<sub>3</sub>)** δ 163.7, 151.0 (q, *J*<sub>C-F</sub> = 34.7 Hz), 150.5, 140.4, 132.0, 129.5, 126.1, 122.3, 122.2, 121.3 (q, *J*<sub>C-F</sub> = 279.4 Hz), 120.6, 114.8, 60.7, 43.4.

**<sup>19</sup>F NMR (376 MHz, CDCl<sub>3</sub>)** δ -71.69.

**HRMS (ESI, TOF) m/z:** [M+H]<sup>+</sup> calcd for C<sub>18</sub>H<sub>16</sub>BrF<sub>3</sub>N<sub>2</sub>O<sub>2</sub>S 461.0141, found: 461.0137.

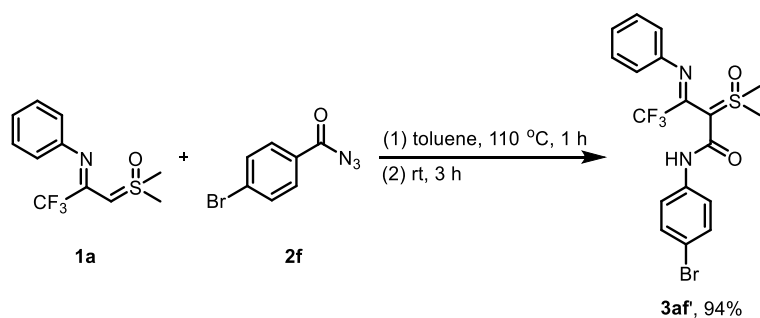

A dried 10 mL Schlenk tube was charged with azide **2f** (0.36 mmol, 1.2 equiv) and toluene (3.0 mL) under nitrogen atmosphere. The reaction mixture was stirred in a preheated oil bath at 110 °C for 1 h. Then cooled at room temperature, **1a** (0.3 mmol) was added. The reaction mixture was stirred at room temperature for 3 h under nitrogen atmosphere. After reaction finished, the reaction solution was evaporated under reduced pressure and purified by column chromatography (PE/EA = 3:1) to afford the product **3af'** (130 mg, 94%).

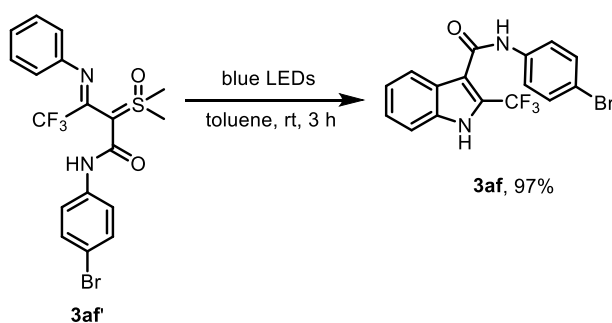

A dried 10 mL Schlenk tube was charged with **3af'** (0.1 mmol) and toluene (1.0 mL) under nitrogen atmosphere. The reaction mixture was irradiation by blue LEDs at room temperature for 3 h. After the reaction finished, the reaction solution was evaporated under reduced pressure and purified by column chromatography (PE/EA = 3:1) to afford the product **3af** (37 mg, 97%).

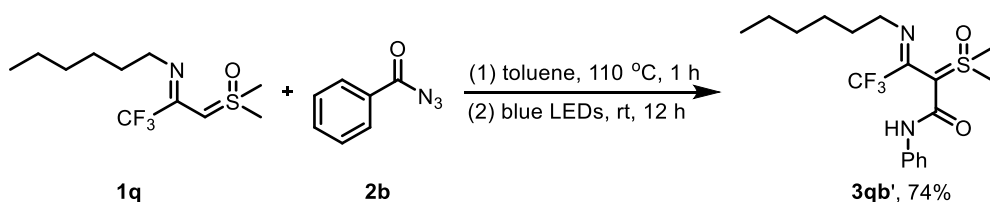

A dried 10 mL Schlenk tube was charged with azide **2b** (0.36 mmol, 1.2 equiv) and toluene (3.0 mL) under nitrogen atmosphere. The reaction mixture was stirred in a preheated oil bath at 110 °C for 1 h. Then cooled at room temperature, **1q** (0.3 mmol) was added. The reaction mixture was irradiation by blue LEDs at room temperature for 12 h under nitrogen atmosphere.

After reaction finished, the reaction solution was evaporated under reduced pressure and purified by column chromatography (PE/EA = 3:1) to afford the product **3qb'** (87 mg, 74%).

**(E)-2-(dimethyl(oxo)-λ<sup>6</sup>-sulfaneylidene)-4,4,4-trifluoro-3-(hexylimino)-N-phenylbutanamide (3qb')**.

**Physical state:** yellow oil.

**<sup>1</sup>H NMR (400 MHz, CDCl<sub>3</sub>)** δ 7.32-7.19 (m, 4H), 7.07-6.95 (m, 1H), 6.15 (s, 1H), 3.70 (q, *J* = 6.4 Hz, 2H), 3.59-3.31 (m, 6H), 1.79-1.63 (m, 2H), 1.41-1.22 (m, 6H), 0.92-0.79 (m, 3H).

**<sup>13</sup>C NMR (150 MHz, CDCl<sub>3</sub>)** δ 162.6, 150.5 (q, *J*<sub>C-F</sub> = 34.7 Hz), 138.4, 129.0, 123.5, 120.1, 56.3, 55.2, 45.0, 43.4, 31.6, 30.0, 27.4, 22.6, 14.1.

**<sup>19</sup>F NMR (376 MHz, CDCl<sub>3</sub>)** δ -70.15.

**HRMS (ESI, TOF) m/z:** [M+H]<sup>+</sup> calcd for C<sub>18</sub>H<sub>25</sub>F<sub>3</sub>N<sub>2</sub>O<sub>2</sub>S 391.1662, found: 391.1654.

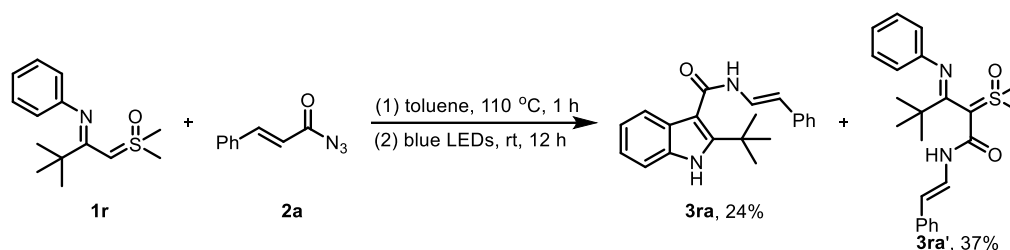

A dried 10 mL Schlenk tube was charged with azide **2a** (0.36 mmol, 1.2 equiv) and toluene (3.0 mL) under nitrogen atmosphere. The reaction mixture was stirred in a preheated oil bath at 110 °C for 1 h. Then cooled at room temperature, **1r** (0.3 mmol) was added. The reaction mixture was irradiation by blue LEDs at room temperature for 12 h under nitrogen atmosphere. After reaction finished, the reaction solution was evaporated under reduced pressure and purified by column chromatography (PE/EA = 3:1) to afford the product **3ra** (23 mg, 24%) and **3ra'** (44 mg, 37%).

**(E)-2-(tert-butyl)-N-styryl-1H-indole-3-carboxamide (3ra).**

**Physical state:** yellow oil.

**<sup>1</sup>H NMR (400 MHz, CDCl<sub>3</sub>)** δ 8.59 (s, 1H), 7.90-7.72 (m, 2H), 7.71-7.62 (m, 1H), 7.43-7.40 (m, 1H), 7.36 (d, *J* = 7.5 Hz, 2H), 7.30 (t, *J* = 7.6 Hz, 2H), 7.24-7.17 (m, 3H), 6.16 (d, *J* = 14.1 Hz, 1H), 1.57 (s, 9H).



$^{13}\text{C}$  NMR (150 MHz,  $\text{CDCl}_3$ )  $\delta$  163.9, 150.5, 136.5, 133.4, 128.8, 127.1, 126.6, 125.6, 123.5, 122.4, 121.5, 118.5, 111.9, 111.5, 107.1, 33.6, 29.7.

HRMS (ESI, TOF)  $m/z$ :  $[M+H]^+$  calcd for  $\text{C}_{21}\text{H}_{22}\text{N}_2\text{O}$  319.1805, found: 319.1800.

(*E*)-2-(dimethyl(oxo)- $\lambda^6$ -sulfaneylidene)-4,4-dimethyl-3-(phenylimino)-*N*-((*E*)-styryl)pentanamide (**3ra'**).

Physical state: yellow oil.

$^1\text{H}$  NMR (400 MHz,  $\text{CDCl}_3$ )  $\delta$  7.51 (dd,  $J = 14.5, 11.1$  Hz, 1H), 7.31-7.23 (m, 6H), 7.14-7.09 (m, 1H), 7.05-7.01 (m, 1H), 6.73 (dd,  $J = 8.4, 1.0$  Hz, 2H), 6.38 (d,  $J = 11.1$  Hz, 1H), 5.92 (d,  $J = 14.5$  Hz, 1H), 3.40 (s, 3H), 2.48 (s, 3H), 1.37 (s, 9H).

$^{13}\text{C}$  NMR (150 MHz,  $\text{CDCl}_3$ )  $\delta$  171.3, 161.3, 152.6, 137.0, 128.6, 128.6, 125.7, 125.0, 123.6, 123.4, 119.2, 108.1, 44.8, 42.5, 41.4, 29.6.

HRMS (ESI, TOF)  $m/z$ :  $[M+H]^+$  calcd for  $\text{C}_{23}\text{H}_{28}\text{N}_2\text{O}_2\text{S}$  397.1944, found: 397.1947.

## 6. Radical-trapping experiments.

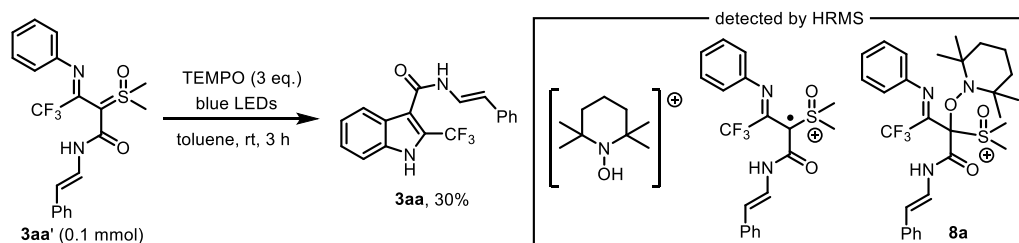

**3aa'** (0.1 mmol) was suspended in toluene (1.0 mL) in a 5 mL round bottom flask. Then TEMPO (3.0 equiv) was added and the reaction mixture was irradiated by blue LEDs at room temperature for 3 h under nitrogen atmosphere. After completion of the reaction, the radical trapping adduct **8a** was observed through HRMS analysis of the reaction solution, shown in Figure S1.

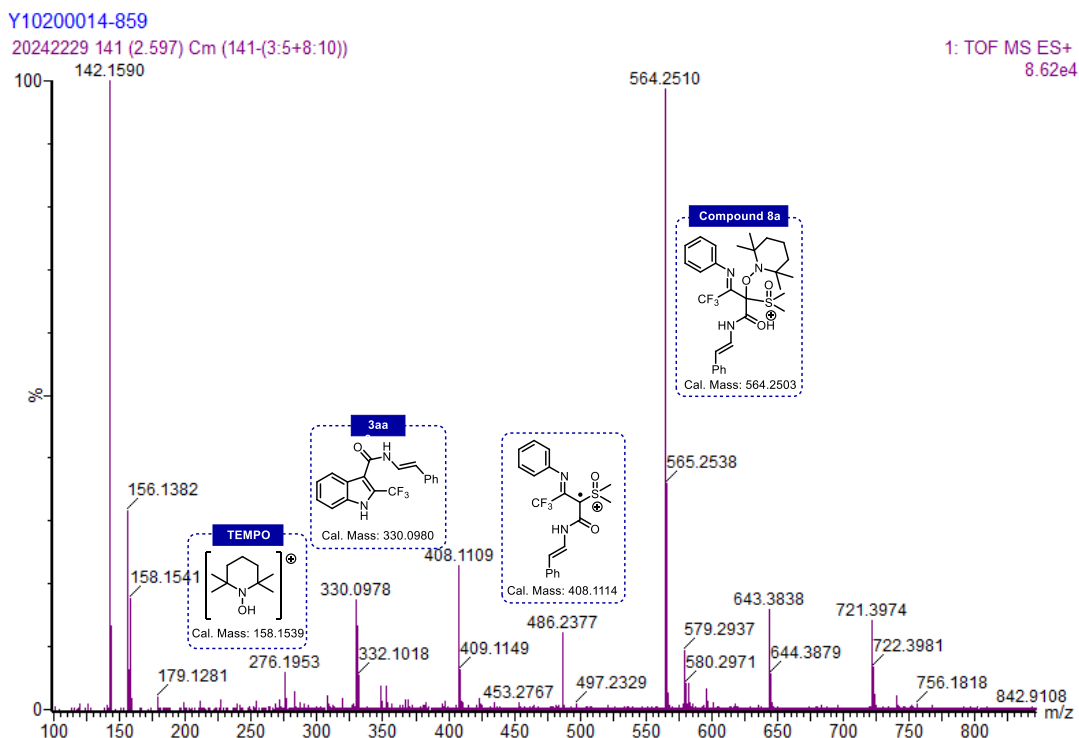

Figure S1. HRMS spectra.

## 7. Kinetic isotope experiments

### 7.1. Parallel reaction

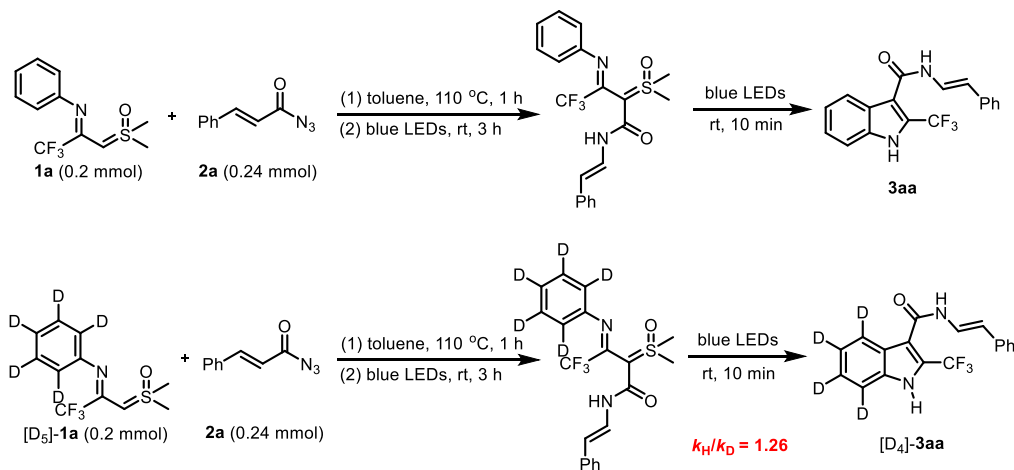

A dried 10 mL Schlenk tube was charged with azide **2a** (0.24 mmol, 1.2 equiv) and toluene (3.0 mL) under nitrogen atmosphere. The reaction mixture was stirred in a preheated oil bath at 110 °C for 1 h. Then cooled at room temperature, **1a** or **[D<sub>5</sub>]-1a** (0.2 mmol) was added. The

reaction mixture was stirred at room temperature for 3 h under nitrogen atmosphere. Then the reaction solution was irradiation by blue LEDs at room temperature for 10 min under nitrogen atmosphere. The reaction solution was evaporated under reduced pressure and purified by column chromatography (PE/EA = 3:1) to afford the product **3aa** (15.3 mg, 23%) or [**D**<sub>4</sub>]-**3aa** (12.1 mg, 18%).

## 7.2. Competitive reaction

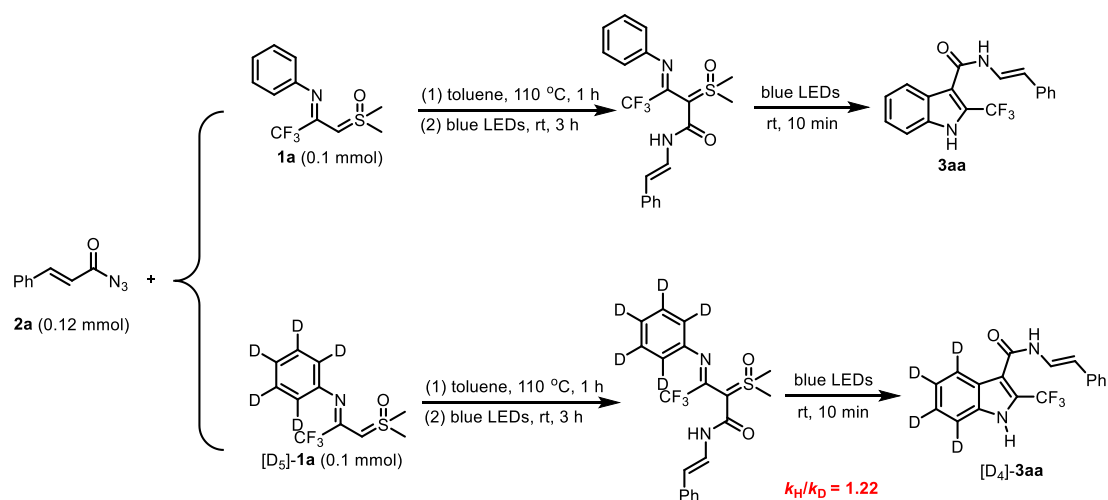

A dried 10 mL Schlenk tube was charged with azide **2a** (0.24 mmol, 1.2 equiv) and toluene (3.0 mL) under nitrogen atmosphere. The reaction mixture was stirred in a preheated oil bath at 110 °C for 1 h. Then cooled at room temperature, **1a** and [**D**<sub>5</sub>]-**1a** (0.2 mmol) was added. The reaction mixture was stirred at room temperature for 3 h under nitrogen atmosphere. Then the reaction solution was irradiation by blue LEDs at room temperature for 10 min under nitrogen atmosphere. The reaction solution was evaporated under reduced pressure and purified by column chromatography (PE/EA = 3:1) to afford the product **3aa** and [**D**<sub>4</sub>]-**3aa** (12.7 mg, 20%).

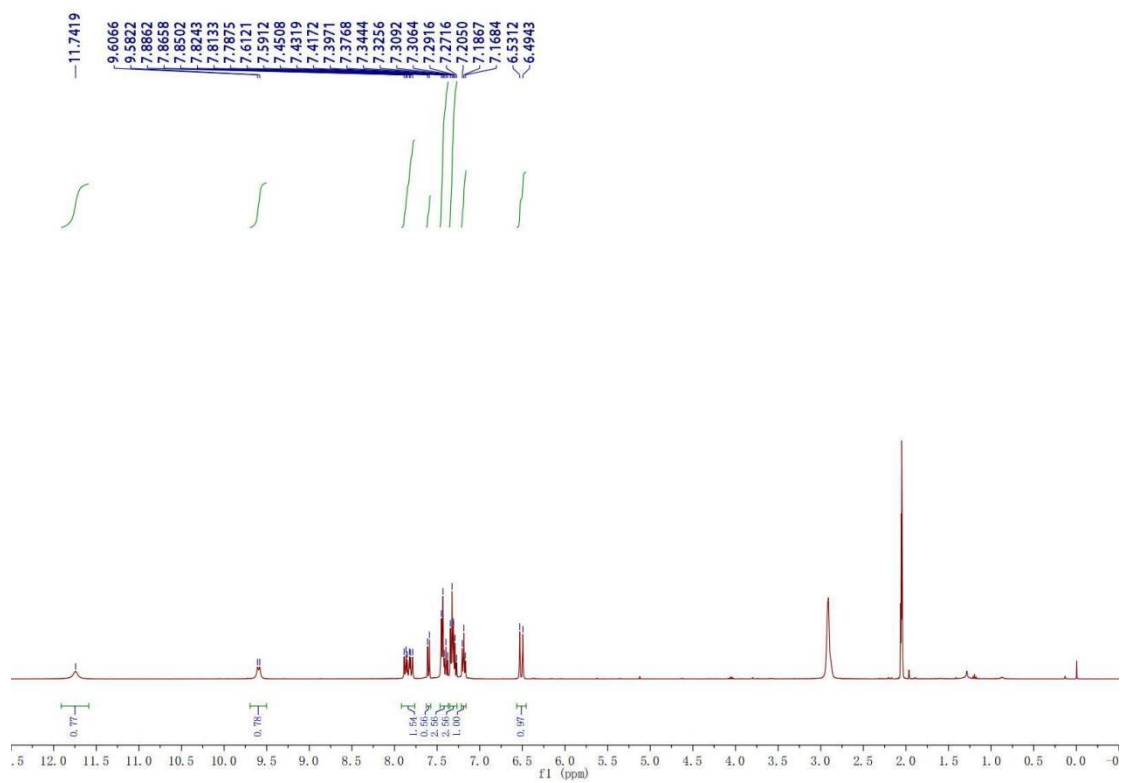

**Figure S2.**  $^1\text{H}$  NMR of **3aa** and  $[\text{D}_4]\text{-3aa}$

## 8. Crystal data and structural refinement of compounds 3aa and 3af

Single crystal of compound **3aa** was obtained by slow evaporation from CHCl<sub>3</sub> solution.

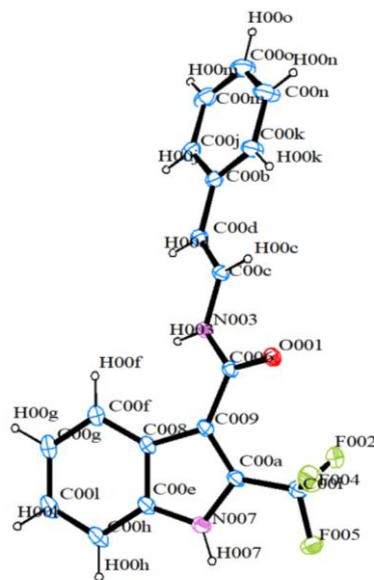

**Figure S1.** Crystal data and structure refinement of product **3aa** (with thermal ellipsoids shown at the 50% probability level)

**Table 1.** Crystal data and structure refinement for **3aa**.

|                      |                                                                 |          |
|----------------------|-----------------------------------------------------------------|----------|
| Identification code  | <b>3aa</b>                                                      |          |
| Empirical formula    | C <sub>18</sub> H <sub>13</sub> F <sub>3</sub> N <sub>2</sub> O |          |
| Formula weight       | 330.30                                                          |          |
| Temperature          | 294.00 K                                                        |          |
| Wavelength           | 1.54178 Å                                                       |          |
| Crystal system       | Orthorhombic                                                    |          |
| Space group          | Fdd2                                                            |          |
| Unit cell dimensions | a = 16.2399(12) Å                                               | a = 90 ° |
|                      | b = 47.800(4) Å                                                 | b = 90 ° |
|                      | c = 8.1006(7) Å                                                 | g = 90 ° |
| Volume               | 6288.2(9) Å <sup>3</sup>                                        |          |
| Z                    | 16                                                              |          |
| Density (calculated) | 1.396 Mg/m <sup>3</sup>                                         |          |

|                                   |                                             |
|-----------------------------------|---------------------------------------------|
| Absorption coefficient            | 0.959 mm <sup>-1</sup>                      |
| F(000)                            | 2720                                        |
| Crystal size                      | 0.27 x 0.19 x 0.18 mm <sup>3</sup>          |
| Theta range for data collection   | 3.699 to 68.742 °                           |
| Index ranges                      | -19<=h<=19, -57<=k<=57, -9<=l<=9            |
| Reflections collected             | 27508                                       |
| Independent reflections           | 2873 [R(int) = 0.0582]                      |
| Completeness to theta = 67.679?   | 99.8 %                                      |
| Absorption correction             | Semi-empirical from equivalents             |
| Max. and min. transmission        | 0.7531 and 0.6448                           |
| Refinement method                 | Full-matrix least-squares on F <sup>2</sup> |
| Data / restraints / parameters    | 2873 / 1 / 217                              |
| Goodness-of-fit on F <sup>2</sup> | 1.167                                       |
| Final R indices [I>2sigma(I)]     | R1 = 0.0435, wR2 = 0.1019                   |
| R indices (all data)              | R1 = 0.0454, wR2 = 0.1033                   |
| Absolute structure parameter      | 0.06(5)                                     |
| Extinction coefficient            | n/a                                         |
| Largest diff. peak and hole       | 0.151 and -0.226 e.Å <sup>-3</sup>          |

**Table 2.** Atomic coordinates ( x 10<sup>4</sup>) and equivalent isotropic displacement parameters (Å<sup>2</sup> x 10<sup>3</sup>) for **3aa**. U(eq) is defined as one third of the trace of the orthogonalized U<sup>ij</sup> tensor.

|        | x       | y       | z       | U(eq) |
|--------|---------|---------|---------|-------|
| O(001) | 5204(1) | 3957(1) | 3810(3) | 51(1) |
| F(002) | 4962(1) | 4494(1) | 5358(3) | 79(1) |

|        |         |         |         |        |
|--------|---------|---------|---------|--------|
| N(003) | 4261(1) | 3639(1) | 4659(3) | 48(1)  |
| F(004) | 5072(1) | 4569(1) | 2782(4) | 95(1)  |
| F(005) | 4254(1) | 4820(1) | 4238(5) | 112(1) |
| C(006) | 4481(2) | 3890(1) | 4031(3) | 44(1)  |
| N(007) | 3081(2) | 4478(1) | 3341(4) | 62(1)  |
| C(008) | 2955(2) | 4011(1) | 3187(3) | 46(1)  |
| C(009) | 3790(2) | 4079(1) | 3649(4) | 45(1)  |
| C(00A) | 3834(2) | 4366(1) | 3691(4) | 52(1)  |
| C(00B) | 5169(2) | 2968(1) | 6282(4) | 52(1)  |
| C(00C) | 4828(2) | 3430(1) | 5045(4) | 48(1)  |
| C(00D) | 4616(2) | 3195(1) | 5798(4) | 52(1)  |
| C(00E) | 2531(2) | 4265(1) | 3024(4) | 54(1)  |
| C(00F) | 2535(2) | 3763(1) | 2825(4) | 55(1)  |
| C(00G) | 1721(2) | 3779(1) | 2381(5) | 67(1)  |
| C(00H) | 1698(2) | 4281(1) | 2599(5) | 67(1)  |
| C(00I) | 4532(2) | 4559(1) | 4018(6) | 68(1)  |
| C(00J) | 4850(2) | 2742(1) | 7159(5) | 64(1)  |
| C(00K) | 6007(2) | 2967(1) | 5935(5) | 70(1)  |
| C(00L) | 1305(2) | 4036(1) | 2289(5) | 70(1)  |
| C(00M) | 5355(3) | 2528(1) | 7705(5) | 82(1)  |
| C(00N) | 6509(3) | 2751(1) | 6479(7) | 98(2)  |
| C(00O) | 6184(3) | 2533(1) | 7357(6) | 95(1)  |

**Table 3.** Bond lengths [ $\text{\AA}$ ] and angles [ $^\circ$ ] for **3aa**.

---

|               |          |
|---------------|----------|
| O(001)-C(006) | 1.229(3) |
| F(002)-C(00I) | 1.328(5) |
| N(003)-H(003) | 0.8600   |
| N(003)-C(006) | 1.355(4) |

|               |          |
|---------------|----------|
| N(003)-C(00C) | 1.391(3) |
| F(004)-C(00I) | 1.331(5) |
| F(005)-C(00I) | 1.336(4) |
| C(006)-C(009) | 1.472(4) |
| N(007)-H(007) | 0.8600   |
| N(007)-C(00A) | 1.366(4) |
| N(007)-C(00E) | 1.380(4) |
| C(008)-C(009) | 1.445(4) |
| C(008)-C(00E) | 1.401(4) |
| C(008)-C(00F) | 1.399(4) |
| C(009)-C(00A) | 1.375(4) |
| C(00A)-C(00I) | 1.485(4) |
| C(00B)-C(00D) | 1.461(4) |
| C(00B)-C(00J) | 1.395(4) |
| C(00B)-C(00K) | 1.389(4) |
| C(00C)-H(00C) | 0.9300   |
| C(00C)-C(00D) | 1.327(4) |
| C(00D)-H(00D) | 0.9300   |
| C(00E)-C(00H) | 1.397(4) |
| C(00F)-H(00F) | 0.9300   |
| C(00F)-C(00G) | 1.373(4) |
| C(00G)-H(00G) | 0.9300   |
| C(00G)-C(00L) | 1.400(5) |
| C(00H)-H(00H) | 0.9300   |
| C(00H)-C(00L) | 1.361(5) |
| C(00J)-H(00J) | 0.9300   |
| C(00J)-C(00M) | 1.381(5) |
| C(00K)-H(00K) | 0.9300   |



|                      |          |
|----------------------|----------|
| C(00K)-C(00N)        | 1.389(5) |
| C(00L)-H(00L)        | 0.9300   |
| C(00M)-H(00M)        | 0.9300   |
| C(00M)-C(00O)        | 1.376(7) |
| C(00N)-H(00N)        | 0.9300   |
| C(00N)-C(00O)        | 1.367(7) |
| C(00O)-H(00O)        | 0.9300   |
| C(006)-N(003)-H(003) | 118.5    |
| C(006)-N(003)-C(00C) | 123.1(2) |
| C(00C)-N(003)-H(003) | 118.5    |
| O(001)-C(006)-N(003) | 122.4(2) |
| O(001)-C(006)-C(009) | 122.6(2) |
| N(003)-C(006)-C(009) | 115.0(2) |
| C(00A)-N(007)-H(007) | 125.4    |
| C(00A)-N(007)-C(00E) | 109.1(2) |
| C(00E)-N(007)-H(007) | 125.4    |
| C(00E)-C(008)-C(009) | 106.9(2) |
| C(00F)-C(008)-C(009) | 134.6(3) |
| C(00F)-C(008)-C(00E) | 118.3(3) |
| C(008)-C(009)-C(006) | 129.2(3) |
| C(00A)-C(009)-C(006) | 124.5(2) |
| C(00A)-C(009)-C(008) | 106.2(2) |
| N(007)-C(00A)-C(009) | 109.9(2) |
| N(007)-C(00A)-C(00I) | 118.5(3) |
| C(009)-C(00A)-C(00I) | 131.6(3) |
| C(00J)-C(00B)-C(00D) | 118.9(3) |
| C(00K)-C(00B)-C(00D) | 123.5(3) |
| C(00K)-C(00B)-C(00J) | 117.6(3) |

|                      |          |
|----------------------|----------|
| N(003)-C(00C)-H(00C) | 118.7    |
| C(00D)-C(00C)-N(003) | 122.6(2) |
| C(00D)-C(00C)-H(00C) | 118.7    |
| C(00B)-C(00D)-H(00D) | 116.8    |
| C(00C)-C(00D)-C(00B) | 126.3(3) |
| C(00C)-C(00D)-H(00D) | 116.8    |
| N(007)-C(00E)-C(008) | 107.8(2) |
| N(007)-C(00E)-C(00H) | 129.1(3) |
| C(00H)-C(00E)-C(008) | 123.2(3) |
| C(008)-C(00F)-H(00F) | 120.8    |
| C(00G)-C(00F)-C(008) | 118.4(3) |
| C(00G)-C(00F)-H(00F) | 120.8    |
| C(00F)-C(00G)-H(00G) | 119.0    |
| C(00F)-C(00G)-C(00L) | 122.0(3) |
| C(00L)-C(00G)-H(00G) | 119.0    |
| C(00E)-C(00H)-H(00H) | 121.6    |
| C(00L)-C(00H)-C(00E) | 116.8(3) |
| C(00L)-C(00H)-H(00H) | 121.6    |
| F(002)-C(00I)-F(004) | 106.1(3) |
| F(002)-C(00I)-F(005) | 106.7(3) |
| F(002)-C(00I)-C(00A) | 113.6(3) |
| F(004)-C(00I)-F(005) | 106.9(3) |
| F(004)-C(00I)-C(00A) | 112.9(3) |
| F(005)-C(00I)-C(00A) | 110.2(3) |
| C(00B)-C(00J)-H(00J) | 119.5    |
| C(00M)-C(00J)-C(00B) | 121.1(3) |
| C(00M)-C(00J)-H(00J) | 119.5    |
| C(00B)-C(00K)-H(00K) | 119.5    |

|                      |          |
|----------------------|----------|
| C(00N)-C(00K)-C(00B) | 120.9(4) |
| C(00N)-C(00K)-H(00K) | 119.5    |
| C(00G)-C(00L)-H(00L) | 119.4    |
| C(00H)-C(00L)-C(00G) | 121.2(3) |
| C(00H)-C(00L)-H(00L) | 119.4    |
| C(00J)-C(00M)-H(00M) | 119.9    |
| C(00O)-C(00M)-C(00J) | 120.2(4) |
| C(00O)-C(00M)-H(00M) | 119.9    |
| C(00K)-C(00N)-H(00N) | 119.8    |
| C(00O)-C(00N)-C(00K) | 120.4(4) |
| C(00O)-C(00N)-H(00N) | 119.8    |
| C(00M)-C(00O)-H(00O) | 120.1    |
| C(00N)-C(00O)-C(00M) | 119.8(4) |
| C(00N)-C(00O)-H(00O) | 120.1    |

---

Symmetry transformations used to generate equivalent atoms:

**Table 4.** Anisotropic displacement parameters ( $\text{\AA}^2 \times 10^3$ ) for **3aa**. The anisotropic displacement factor exponent takes the form:  $-2p^2 [ h^2 a^{*2} U^{11} + \dots + 2 h k a^* b^* U^{12} ]$

---

|        | U <sup>11</sup> | U <sup>22</sup> | U <sup>33</sup> | U <sup>23</sup> | U <sup>13</sup> | U <sup>12</sup> |
|--------|-----------------|-----------------|-----------------|-----------------|-----------------|-----------------|
| O(001) | 33(1)           | 57(1)           | 64(1)           | -1(1)           | 4(1)            | 0(1)            |
| F(002) | 61(1)           | 72(1)           | 104(2)          | -11(1)          | -22(1)          | -2(1)           |
| N(003) | 32(1)           | 50(1)           | 64(2)           | 6(1)            | 3(1)            | 4(1)            |
| F(004) | 64(1)           | 102(2)          | 121(2)          | 33(2)           | 11(1)           | -22(1)          |
| F(005) | 70(1)           | 47(1)           | 221(4)          | -1(2)           | -21(2)          | 2(1)            |
| C(006) | 36(1)           | 49(1)           | 47(2)           | -2(1)           | 2(1)            | 2(1)            |
| N(007) | 46(1)           | 52(1)           | 86(2)           | 12(1)           | -7(1)           | 8(1)            |

|        |        |        |        |       |        |        |
|--------|--------|--------|--------|-------|--------|--------|
| C(008) | 36(1)  | 59(2)  | 44(1)  | 4(1)  | -1(1)  | 0(1)   |
| C(009) | 34(1)  | 52(1)  | 50(1)  | 4(1)  | 0(1)   | 2(1)   |
| C(00A) | 37(1)  | 52(2)  | 68(2)  | 9(1)  | -3(1)  | 3(1)   |
| C(00B) | 57(2)  | 44(1)  | 54(2)  | -3(1) | 0(1)   | 4(1)   |
| C(00C) | 38(1)  | 48(1)  | 57(2)  | 0(1)  | 1(1)   | 6(1)   |
| C(00D) | 42(1)  | 51(2)  | 64(2)  | 1(1)  | 4(1)   | 2(1)   |
| C(00E) | 41(1)  | 63(2)  | 58(2)  | 14(1) | -4(1)  | 3(1)   |
| C(00F) | 50(2)  | 65(2)  | 50(2)  | 0(1)  | -5(1)  | -4(1)  |
| C(00G) | 52(2)  | 89(2)  | 60(2)  | 3(2)  | -11(2) | -20(2) |
| C(00H) | 42(2)  | 88(2)  | 70(2)  | 22(2) | -7(2)  | 8(2)   |
| C(00I) | 49(2)  | 51(2)  | 105(3) | 8(2)  | -7(2)  | 2(1)   |
| C(00J) | 81(2)  | 51(2)  | 61(2)  | 1(1)  | -1(2)  | -7(2)  |
| C(00K) | 58(2)  | 61(2)  | 92(3)  | 15(2) | 4(2)   | 14(2)  |
| C(00L) | 44(2)  | 102(3) | 66(2)  | 20(2) | -13(2) | -6(2)  |
| C(00M) | 128(4) | 47(2)  | 72(2)  | 7(2)  | -10(2) | 1(2)   |
| C(00N) | 83(3)  | 81(3)  | 130(4) | 22(3) | 1(3)   | 34(2)  |
| C(00O) | 114(4) | 68(2)  | 103(3) | 11(2) | -17(3) | 31(2)  |

**Table 5.** Hydrogen coordinates ( $\times 10^4$ ) and isotropic displacement parameters ( $\text{\AA}^2 \times 10^3$ ) for **3aa**.

|        | x    | y    | z    | U(eq) |
|--------|------|------|------|-------|
| H(003) | 3748 | 3606 | 4828 | 58    |
| H(007) | 2967 | 4654 | 3321 | 74    |
| H(00C) | 5378 | 3458 | 4765 | 57    |
| H(00D) | 4060 | 3171 | 6040 | 62    |
| H(00F) | 2802 | 3591 | 2883 | 66    |

|        |      |      |      |     |
|--------|------|------|------|-----|
| H(00G) | 1437 | 3616 | 2135 | 80  |
| H(00H) | 1426 | 4452 | 2533 | 80  |
| H(00J) | 4289 | 2734 | 7380 | 77  |
| H(00K) | 6235 | 3113 | 5330 | 84  |
| H(00L) | 749  | 4038 | 2010 | 85  |
| H(00M) | 5133 | 2381 | 8310 | 99  |
| H(00N) | 7069 | 2754 | 6245 | 118 |
| H(00O) | 6522 | 2388 | 7719 | 114 |

**Table 6.** Torsion angles [ ° ] for **3aa**.

---

|                             |           |
|-----------------------------|-----------|
| O(001)-C(006)-C(009)-C(008) | 152.1(3)  |
| O(001)-C(006)-C(009)-C(00A) | -28.6(4)  |
| N(003)-C(006)-C(009)-C(008) | -28.5(4)  |
| N(003)-C(006)-C(009)-C(00A) | 150.8(3)  |
| N(003)-C(00C)-C(00D)-C(00B) | -178.5(3) |
| C(006)-N(003)-C(00C)-C(00D) | 173.7(3)  |
| C(006)-C(009)-C(00A)-N(007) | -177.5(3) |
| C(006)-C(009)-C(00A)-C(00I) | 3.3(6)    |
| N(007)-C(00A)-C(00I)-F(002) | 132.3(3)  |
| N(007)-C(00A)-C(00I)-F(004) | -106.8(4) |
| N(007)-C(00A)-C(00I)-F(005) | 12.6(5)   |
| N(007)-C(00E)-C(00H)-C(00L) | 177.5(4)  |
| C(008)-C(009)-C(00A)-N(007) | 1.9(4)    |
| C(008)-C(009)-C(00A)-C(00I) | -177.3(4) |
| C(008)-C(00E)-C(00H)-C(00L) | -2.1(5)   |
| C(008)-C(00F)-C(00G)-C(00L) | -0.2(5)   |
| C(009)-C(008)-C(00E)-N(007) | 1.0(3)    |
| C(009)-C(008)-C(00E)-C(00H) | -179.4(3) |

|                             |           |
|-----------------------------|-----------|
| C(009)-C(008)-C(00F)-C(00G) | -178.4(3) |
| C(009)-C(00A)-C(00I)-F(002) | -48.5(5)  |
| C(009)-C(00A)-C(00I)-F(004) | 72.4(5)   |
| C(009)-C(00A)-C(00I)-F(005) | -168.2(4) |
| C(00A)-N(007)-C(00E)-C(008) | 0.2(4)    |
| C(00A)-N(007)-C(00E)-C(00H) | -179.4(3) |
| C(00B)-C(00J)-C(00M)-C(00O) | -1.4(6)   |
| C(00B)-C(00K)-C(00N)-C(00O) | 0.6(7)    |
| C(00C)-N(003)-C(006)-O(001) | -2.6(4)   |
| C(00C)-N(003)-C(006)-C(009) | 177.9(3)  |
| C(00D)-C(00B)-C(00J)-C(00M) | -177.2(3) |
| C(00D)-C(00B)-C(00K)-C(00N) | 177.6(4)  |
| C(00E)-N(007)-C(00A)-C(009) | -1.4(4)   |
| C(00E)-N(007)-C(00A)-C(00I) | 178.0(3)  |
| C(00E)-C(008)-C(009)-C(006) | 177.6(3)  |
| C(00E)-C(008)-C(009)-C(00A) | -1.8(3)   |
| C(00E)-C(008)-C(00F)-C(00G) | -2.2(4)   |
| C(00E)-C(00H)-C(00L)-C(00G) | -0.4(5)   |
| C(00F)-C(008)-C(009)-C(006) | -5.9(5)   |
| C(00F)-C(008)-C(009)-C(00A) | 174.7(3)  |
| C(00F)-C(008)-C(00E)-N(007) | -176.2(3) |
| C(00F)-C(008)-C(00E)-C(00H) | 3.4(5)    |
| C(00F)-C(00G)-C(00L)-C(00H) | 1.6(6)    |
| C(00J)-C(00B)-C(00D)-C(00C) | 176.0(3)  |
| C(00J)-C(00B)-C(00K)-C(00N) | -1.5(6)   |
| C(00J)-C(00M)-C(00O)-C(00N) | 0.5(7)    |
| C(00K)-C(00B)-C(00D)-C(00C) | -3.1(5)   |
| C(00K)-C(00B)-C(00J)-C(00M) | 1.9(5)    |

C(00K)-C(00N)-C(00O)-C(00M)

-0.1(8)

---

Symmetry transformations used to generate equivalent atoms:

**Table 7.** Hydrogen bonds for **3aa**.

---

| D-H...A | d(D-H) | d(H...A) | d(D...A) | <(DHA) |
|---------|--------|----------|----------|--------|
|---------|--------|----------|----------|--------|

---

Single crystal of compound **3af'** was obtained by slow evaporation from CH<sub>2</sub>Cl<sub>2</sub> solution.

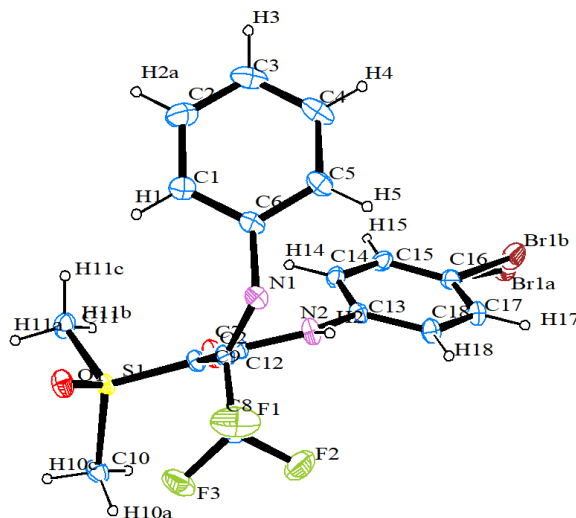

**Figure S2.** Crystal data and structure refinement of product **3af'** (with thermal ellipsoids shown at the 50% probability level)

**Table 1.** Crystal data and structure refinement for **3af'**.

|                        |                                                                                   |               |
|------------------------|-----------------------------------------------------------------------------------|---------------|
| Identification code    | <b>3af'</b>                                                                       |               |
| Empirical formula      | C <sub>18</sub> H <sub>16</sub> Br F <sub>3</sub> N <sub>2</sub> O <sub>2</sub> S |               |
| Formula weight         | 461.30                                                                            |               |
| Temperature            | 295.00 K                                                                          |               |
| Wavelength             | 1.54178 Å                                                                         |               |
| Crystal system         | Monoclinic                                                                        |               |
| Space group            | P 1 21/n 1                                                                        |               |
| Unit cell dimensions   | a = 16.5134(7) Å                                                                  | a = 90 °      |
|                        | b = 8.0265(4) Å                                                                   | b = 117.207 ° |
|                        | c = 16.5356(7) Å                                                                  | c = 90 °      |
| Volume                 | 1949.22(16) Å <sup>3</sup>                                                        |               |
| Z                      | 4                                                                                 |               |
| Density (calculated)   | 1.572 Mg/m <sup>3</sup>                                                           |               |
| Absorption coefficient | 4.278 mm <sup>-1</sup>                                                            |               |



|                                   |                                             |
|-----------------------------------|---------------------------------------------|
| F(000)                            | 928                                         |
| Crystal size                      | 0.25 x 0.21 x 0.2 mm <sup>3</sup>           |
| Theta range for data collection   | 6.026 to 68.272 °                           |
| Index ranges                      | -19<=h<=19, -9<=k<=9, -19<=l<=19            |
| Reflections collected             | 30846                                       |
| Independent reflections           | 3476 [R(int) = 0.0515]                      |
| Completeness to theta = 67.679?   | 97.7 %                                      |
| Absorption correction             | Semi-empirical from equivalents             |
| Max. and min. transmission        | 0.7531 and 0.4239                           |
| Refinement method                 | Full-matrix least-squares on F <sup>2</sup> |
| Data / restraints / parameters    | 3476 / 1 / 256                              |
| Goodness-of-fit on F <sup>2</sup> | 1.130                                       |
| Final R indices [I>2sigma(I)]     | R1 = 0.0493, wR2 = 0.1274                   |
| R indices (all data)              | R1 = 0.0518, wR2 = 0.1292                   |
| Extinction coefficient            | n/a                                         |
| Largest diff. peak and hole       | 0.513 and -0.571 e.Å <sup>-3</sup>          |

**Table 2.** Atomic coordinates ( x 10<sup>4</sup>) and equivalent isotropic displacement parameters (Å<sup>2</sup>x 10<sup>3</sup>) for **3af**. U(eq) is defined as one third of the trace of the orthogonalized U<sub>ij</sub> tensor.

|        | x       | y       | z       | U(eq) |
|--------|---------|---------|---------|-------|
| Br(1A) | 8481(4) | 5723(7) | 6045(4) | 58(1) |
| S(1)   | 3554(1) | 4490(1) | 7509(1) | 37(1) |
| O(2)   | 4957(2) | 4014(2) | 6919(2) | 56(1) |
| O(1)   | 2877(2) | 5263(3) | 7714(2) | 54(1) |

|        |         |          |         |        |
|--------|---------|----------|---------|--------|
| F(3)   | 4355(2) | 6375(3)  | 9304(2) | 89(1)  |
| N(1)   | 4233(2) | 8960(3)  | 7593(2) | 43(1)  |
| N(2)   | 5614(2) | 6563(3)  | 7321(2) | 46(1)  |
| F(1)   | 4295(3) | 8955(4)  | 9206(2) | 114(1) |
| F(2)   | 5496(2) | 7719(6)  | 9440(2) | 126(1) |
| C(12)  | 4964(2) | 5406(3)  | 7238(2) | 40(1)  |
| C(13)  | 6256(2) | 6399(3)  | 6985(2) | 39(1)  |
| C(7)   | 4323(2) | 7537(3)  | 7961(2) | 37(1)  |
| C(6)   | 3937(2) | 9140(3)  | 6646(2) | 44(1)  |
| C(14)  | 6075(2) | 5515(4)  | 6197(2) | 47(1)  |
| C(9)   | 4337(2) | 5905(3)  | 7567(2) | 38(1)  |
| C(8)   | 4609(2) | 7635(4)  | 8974(2) | 48(1)  |
| C(17)  | 7743(2) | 7085(4)  | 7152(2) | 50(1)  |
| C(16)  | 7554(2) | 6183(4)  | 6379(2) | 47(1)  |
| C(5)   | 4465(3) | 10109(4) | 6373(3) | 58(1)  |
| C(15)  | 6723(2) | 5412(5)  | 5894(2) | 50(1)  |
| C(18)  | 7094(2) | 7184(4)  | 7454(2) | 49(1)  |
| C(10)  | 4059(3) | 2777(4)  | 8228(3) | 55(1)  |
| C(1)   | 3110(3) | 8531(5)  | 6010(2) | 59(1)  |
| C(11)  | 3022(2) | 3562(5)  | 6426(2) | 59(1)  |
| C(4)   | 4174(4) | 10413(5) | 5461(3) | 78(1)  |
| C(2)   | 2815(4) | 8870(6)  | 5096(3) | 82(1)  |
| C(3)   | 3354(4) | 9802(6)  | 4826(3) | 86(1)  |
| Br(1B) | 8460(3) | 6130(20) | 5961(5) | 80(2)  |

**Table 3.** Bond lengths [ $\text{\AA}$ ] and angles [ $^\circ$ ] for **3af'**.

---

|              |          |
|--------------|----------|
| Br(1A)-C(16) | 1.886(6) |
| S(1)-O(1)    | 1.448(2) |

|              |          |
|--------------|----------|
| S(1)-C(9)    | 1.691(3) |
| S(1)-C(10)   | 1.759(3) |
| S(1)-C(11)   | 1.759(3) |
| O(2)-C(12)   | 1.234(3) |
| F(3)-C(8)    | 1.306(4) |
| N(1)-C(7)    | 1.270(4) |
| N(1)-C(6)    | 1.420(4) |
| N(2)-H(2)    | 0.8600   |
| N(2)-C(12)   | 1.378(4) |
| N(2)-C(13)   | 1.411(4) |
| F(1)-C(8)    | 1.312(4) |
| F(2)-C(8)    | 1.308(4) |
| C(12)-C(9)   | 1.430(4) |
| C(13)-C(14)  | 1.391(4) |
| C(13)-C(18)  | 1.391(4) |
| C(7)-C(9)    | 1.468(4) |
| C(7)-C(8)    | 1.520(4) |
| C(6)-C(5)    | 1.388(5) |
| C(6)-C(1)    | 1.378(5) |
| C(14)-H(14)  | 0.9300   |
| C(14)-C(15)  | 1.375(5) |
| C(17)-H(17)  | 0.9300   |
| C(17)-C(16)  | 1.375(5) |
| C(17)-C(18)  | 1.375(4) |
| C(16)-C(15)  | 1.380(5) |
| C(16)-Br(1B) | 1.915(6) |
| C(5)-H(5)    | 0.9300   |
| C(5)-C(4)    | 1.379(6) |

|                  |            |
|------------------|------------|
| C(15)-H(15)      | 0.9300     |
| C(18)-H(18)      | 0.9300     |
| C(10)-H(10A)     | 0.9600     |
| C(10)-H(10B)     | 0.9600     |
| C(10)-H(10C)     | 0.9600     |
| C(1)-H(1)        | 0.9300     |
| C(1)-C(2)        | 1.386(6)   |
| C(11)-H(11A)     | 0.9600     |
| C(11)-H(11B)     | 0.9600     |
| C(11)-H(11C)     | 0.9600     |
| C(4)-H(4)        | 0.9300     |
| C(4)-C(3)        | 1.369(7)   |
| C(2)-H(2A)       | 0.9300     |
| C(2)-C(3)        | 1.384(7)   |
| C(3)-H(3)        | 0.9300     |
| O(1)-S(1)-C(9)   | 110.56(14) |
| O(1)-S(1)-C(10)  | 110.82(16) |
| O(1)-S(1)-C(11)  | 109.91(17) |
| C(9)-S(1)-C(10)  | 111.88(16) |
| C(9)-S(1)-C(11)  | 110.77(17) |
| C(10)-S(1)-C(11) | 102.65(19) |
| C(7)-N(1)-C(6)   | 121.8(2)   |
| C(12)-N(2)-H(2)  | 117.0      |
| C(12)-N(2)-C(13) | 126.1(2)   |
| C(13)-N(2)-H(2)  | 117.0      |
| O(2)-C(12)-N(2)  | 120.6(3)   |
| O(2)-C(12)-C(9)  | 123.3(3)   |
| N(2)-C(12)-C(9)  | 116.1(2)   |

|                    |          |
|--------------------|----------|
| C(14)-C(13)-N(2)   | 122.6(3) |
| C(18)-C(13)-N(2)   | 118.3(3) |
| C(18)-C(13)-C(14)  | 119.1(3) |
| N(1)-C(7)-C(9)     | 127.7(3) |
| N(1)-C(7)-C(8)     | 113.0(2) |
| C(9)-C(7)-C(8)     | 118.4(2) |
| C(5)-C(6)-N(1)     | 117.8(3) |
| C(1)-C(6)-N(1)     | 121.8(3) |
| C(1)-C(6)-C(5)     | 120.1(3) |
| C(13)-C(14)-H(14)  | 119.9    |
| C(15)-C(14)-C(13)  | 120.1(3) |
| C(15)-C(14)-H(14)  | 119.9    |
| C(12)-C(9)-S(1)    | 117.3(2) |
| C(12)-C(9)-C(7)    | 125.5(2) |
| C(7)-C(9)-S(1)     | 117.2(2) |
| F(3)-C(8)-F(1)     | 104.9(3) |
| F(3)-C(8)-F(2)     | 106.3(3) |
| F(3)-C(8)-C(7)     | 115.0(3) |
| F(1)-C(8)-C(7)     | 113.5(3) |
| F(2)-C(8)-F(1)     | 105.7(3) |
| F(2)-C(8)-C(7)     | 110.7(3) |
| C(16)-C(17)-H(17)  | 120.5    |
| C(18)-C(17)-H(17)  | 120.5    |
| C(18)-C(17)-C(16)  | 119.0(3) |
| C(17)-C(16)-Br(1A) | 120.4(3) |
| C(17)-C(16)-C(15)  | 121.2(3) |
| C(17)-C(16)-Br(1B) | 117.7(4) |
| C(15)-C(16)-Br(1A) | 117.9(3) |

|                     |          |
|---------------------|----------|
| C(15)-C(16)-Br(1B)  | 121.0(3) |
| C(6)-C(5)-H(5)      | 120.1    |
| C(4)-C(5)-C(6)      | 119.8(4) |
| C(4)-C(5)-H(5)      | 120.1    |
| C(14)-C(15)-C(16)   | 119.7(3) |
| C(14)-C(15)-H(15)   | 120.2    |
| C(16)-C(15)-H(15)   | 120.2    |
| C(13)-C(18)-H(18)   | 119.6    |
| C(17)-C(18)-C(13)   | 120.9(3) |
| C(17)-C(18)-H(18)   | 119.6    |
| S(1)-C(10)-H(10A)   | 109.5    |
| S(1)-C(10)-H(10B)   | 109.5    |
| S(1)-C(10)-H(10C)   | 109.5    |
| H(10A)-C(10)-H(10B) | 109.5    |
| H(10A)-C(10)-H(10C) | 109.5    |
| H(10B)-C(10)-H(10C) | 109.5    |
| C(6)-C(1)-H(1)      | 120.2    |
| C(6)-C(1)-C(2)      | 119.6(4) |
| C(2)-C(1)-H(1)      | 120.2    |
| S(1)-C(11)-H(11A)   | 109.5    |
| S(1)-C(11)-H(11B)   | 109.5    |
| S(1)-C(11)-H(11C)   | 109.5    |
| H(11A)-C(11)-H(11B) | 109.5    |
| H(11A)-C(11)-H(11C) | 109.5    |
| H(11B)-C(11)-H(11C) | 109.5    |
| C(5)-C(4)-H(4)      | 119.9    |
| C(3)-C(4)-C(5)      | 120.3(4) |
| C(3)-C(4)-H(4)      | 119.9    |

|                 |          |
|-----------------|----------|
| C(1)-C(2)-H(2A) | 120.0    |
| C(3)-C(2)-C(1)  | 120.1(5) |
| C(3)-C(2)-H(2A) | 120.0    |
| C(4)-C(3)-C(2)  | 120.1(4) |
| C(4)-C(3)-H(3)  | 119.9    |
| C(2)-C(3)-H(3)  | 119.9    |

---

Symmetry transformations used to generate equivalent atoms:

**Table 4.** Anisotropic displacement parameters ( $\text{\AA}^2 \times 10^3$ ) for **3af'**. The anisotropic displacement factor exponent takes the form:  $-2p^2 [ h^2 a^*2U^{11} + \dots + 2 h k a^* b^* U^{12} ]$

---

|        | U11    | U22    | U33   | U23    | U13   | U12    |
|--------|--------|--------|-------|--------|-------|--------|
| Br(1A) | 46(1)  | 79(2)  | 62(1) | 4(1)   | 35(1) | 9(1)   |
| S(1)   | 40(1)  | 30(1)  | 48(1) | -1(1)  | 24(1) | 0(1)   |
| O(2)   | 68(2)  | 32(1)  | 88(2) | -14(1) | 53(1) | -7(1)  |
| O(1)   | 50(1)  | 46(1)  | 79(2) | -2(1)  | 42(1) | 3(1)   |
| F(3)   | 145(2) | 78(2)  | 54(1) | -7(1)  | 53(2) | -40(2) |
| N(1)   | 52(2)  | 33(1)  | 49(1) | -4(1)  | 28(1) | 2(1)   |
| N(2)   | 49(2)  | 34(1)  | 70(2) | -11(1) | 40(1) | -6(1)  |
| F(1)   | 197(4) | 86(2)  | 63(2) | -11(1) | 63(2) | 40(2)  |
| F(2)   | 62(2)  | 248(4) | 54(1) | 13(2)  | 15(1) | -32(2) |
| C(12)  | 45(2)  | 31(1)  | 50(2) | 2(1)   | 27(1) | 3(1)   |
| C(13)  | 43(2)  | 28(1)  | 54(2) | 3(1)   | 28(1) | 3(1)   |
| C(7)   | 40(2)  | 31(1)  | 44(2) | -3(1)  | 23(1) | -3(1)  |
| C(6)   | 65(2)  | 27(1)  | 50(2) | 1(1)   | 34(2) | 9(1)   |
| C(14)  | 38(2)  | 59(2)  | 44(2) | -2(1)  | 18(1) | -5(1)  |

|        |        |        |       |        |       |        |
|--------|--------|--------|-------|--------|-------|--------|
| C(9)   | 41(2)  | 29(1)  | 49(2) | 0(1)   | 26(1) | -1(1)  |
| C(8)   | 53(2)  | 47(2)  | 46(2) | -5(1)  | 25(2) | -7(1)  |
| C(17)  | 43(2)  | 50(2)  | 60(2) | -5(2)  | 26(2) | -8(1)  |
| C(16)  | 41(2)  | 57(2)  | 48(2) | 8(1)   | 25(1) | 7(1)   |
| C(5)   | 78(2)  | 40(2)  | 66(2) | 3(2)   | 44(2) | 1(2)   |
| C(15)  | 45(2)  | 70(2)  | 35(2) | -2(1)  | 18(1) | 0(2)   |
| C(18)  | 53(2)  | 40(2)  | 60(2) | -12(1) | 32(2) | -8(1)  |
| C(10)  | 66(2)  | 36(2)  | 69(2) | 9(2)   | 35(2) | 0(2)   |
| C(1)   | 67(2)  | 55(2)  | 55(2) | 4(2)   | 27(2) | 5(2)   |
| C(11)  | 53(2)  | 64(2)  | 56(2) | -13(2) | 21(2) | -12(2) |
| C(4)   | 126(4) | 51(2)  | 86(3) | 16(2)  | 74(3) | 8(2)   |
| C(2)   | 92(3)  | 83(3)  | 54(2) | 5(2)   | 18(2) | 8(2)   |
| C(3)   | 134(4) | 72(3)  | 53(2) | 16(2)  | 44(3) | 18(3)  |
| Br(1B) | 48(1)  | 144(4) | 57(1) | -10(2) | 32(1) | -9(2)  |

**Table 5.** Hydrogen coordinates ( $\times 10^4$ ) and isotropic displacement parameters ( $\text{\AA}^2 \times 10^3$ ) for **3af**.

|        | x    | y     | z    | U(eq) |
|--------|------|-------|------|-------|
| H(2)   | 5630 | 7471  | 7605 | 55    |
| H(14)  | 5515 | 4993  | 5874 | 57    |
| H(17)  | 8300 | 7620  | 7466 | 60    |
| H(5)   | 5014 | 10552 | 6804 | 69    |
| H(15)  | 6601 | 4825  | 5366 | 60    |
| H(18)  | 7218 | 7785  | 7979 | 58    |
| H(10A) | 4308 | 3128  | 8851 | 83    |



|        |      |       |      |     |
|--------|------|-------|------|-----|
| H(10B) | 4537 | 2336  | 8113 | 83  |
| H(10C) | 3608 | 1931  | 8113 | 83  |
| H(1)   | 2751 | 7896  | 6192 | 71  |
| H(11A) | 2593 | 2742  | 6413 | 88  |
| H(11B) | 3474 | 3038  | 6299 | 88  |
| H(11C) | 2710 | 4401  | 5976 | 88  |
| H(4)   | 4535 | 11036 | 5277 | 93  |
| H(2A)  | 2254 | 8472  | 4664 | 99  |
| H(3)   | 3160 | 10013 | 4212 | 103 |

**Table 6.** Torsion angles [ ° ] for **3af'**.

---

|                          |           |
|--------------------------|-----------|
| Br(1A)-C(16)-C(15)-C(14) | 170.4(3)  |
| O(2)-C(12)-C(9)-S(1)     | 0.1(4)    |
| O(2)-C(12)-C(9)-C(7)     | 179.3(3)  |
| O(1)-S(1)-C(9)-C(12)     | -169.9(2) |
| O(1)-S(1)-C(9)-C(7)      | 10.7(3)   |
| N(1)-C(7)-C(9)-S(1)      | -122.5(3) |
| N(1)-C(7)-C(9)-C(12)     | 58.2(5)   |
| N(1)-C(7)-C(8)-F(3)      | 152.7(3)  |
| N(1)-C(7)-C(8)-F(1)      | 31.8(4)   |
| N(1)-C(7)-C(8)-F(2)      | -86.8(4)  |
| N(1)-C(6)-C(5)-C(4)      | -175.6(3) |
| N(1)-C(6)-C(1)-C(2)      | 174.1(3)  |
| N(2)-C(12)-C(9)-S(1)     | -177.9(2) |
| N(2)-C(12)-C(9)-C(7)     | 1.4(4)    |
| N(2)-C(13)-C(14)-C(15)   | 179.2(3)  |
| N(2)-C(13)-C(18)-C(17)   | -179.2(3) |
| C(12)-N(2)-C(13)-C(14)   | 31.8(5)   |

|                          |           |
|--------------------------|-----------|
| C(12)-N(2)-C(13)-C(18)   | -149.6(3) |
| C(13)-N(2)-C(12)-O(2)    | 7.0(5)    |
| C(13)-N(2)-C(12)-C(9)    | -174.9(3) |
| C(13)-C(14)-C(15)-C(16)  | 0.3(5)    |
| C(7)-N(1)-C(6)-C(5)      | -127.7(3) |
| C(7)-N(1)-C(6)-C(1)      | 59.0(4)   |
| C(6)-N(1)-C(7)-C(9)      | 13.7(5)   |
| C(6)-N(1)-C(7)-C(8)      | -177.7(3) |
| C(6)-C(5)-C(4)-C(3)      | 1.8(6)    |
| C(6)-C(1)-C(2)-C(3)      | 0.6(7)    |
| C(14)-C(13)-C(18)-C(17)  | -0.5(5)   |
| C(9)-C(7)-C(8)-F(3)      | -37.5(4)  |
| C(9)-C(7)-C(8)-F(1)      | -158.4(3) |
| C(9)-C(7)-C(8)-F(2)      | 83.0(4)   |
| C(8)-C(7)-C(9)-S(1)      | 69.4(3)   |
| C(8)-C(7)-C(9)-C(12)     | -109.9(3) |
| C(17)-C(16)-C(15)-C(14)  | -1.3(5)   |
| C(16)-C(17)-C(18)-C(13)  | -0.5(5)   |
| C(5)-C(6)-C(1)-C(2)      | 1.0(5)    |
| C(5)-C(4)-C(3)-C(2)      | -0.2(7)   |
| C(18)-C(13)-C(14)-C(15)  | 0.6(5)    |
| C(18)-C(17)-C(16)-Br(1A) | -170.1(3) |
| C(18)-C(17)-C(16)-C(15)  | 1.4(5)    |
| C(18)-C(17)-C(16)-Br(1B) | 178.2(7)  |
| C(10)-S(1)-C(9)-C(12)    | 66.0(3)   |
| C(10)-S(1)-C(9)-C(7)     | -113.3(3) |
| C(1)-C(6)-C(5)-C(4)      | -2.2(5)   |
| C(1)-C(2)-C(3)-C(4)      | -1.1(7)   |

|                          |           |
|--------------------------|-----------|
| C(11)-S(1)-C(9)-C(12)    | -47.8(3)  |
| C(11)-S(1)-C(9)-C(7)     | 132.8(2)  |
| Br(1B)-C(16)-C(15)-C(14) | -178.0(7) |

---

Symmetry transformations used to generate equivalent atoms:

**Table 7.** Hydrogen bonds for **3af** [Å and °].

---

| D-H...A | d(D-H) | d(H...A) | d(D...A) | <(DHA) |
|---------|--------|----------|----------|--------|
|---------|--------|----------|----------|--------|

---

## 9. References

1. Wen, S.; Tian, Q.; Chen, Y.; Zhang, Y.; Cheng, G. Annulation of CF<sub>3</sub>-Imidoyl Sulfoxonium Ylides with 1,3-Dicarbonyl Compounds: Access to 1,2,3-Trisubstituted 5-Trifluoromethylpyrroles. *Org. Lett.*, **2021**, *23*, 7407-7411.
2. Pan, M.; Tong, Y.; Qiu, X.; Zeng, X.; Xiong, B. One-pot synthesis of 3-trifluoromethylbenzo[*b*][1,4]oxazines from CF<sub>3</sub>-imidoyl sulfoxonium ylides with 2-bromophenols. *Chem. Commun.*, **2022**, *58*, 12443-12446.
3. Wen, S.; Chen, Y.; Tian, Q.; Zhang, Y.; Cheng, G. Transition-Metal-, Additive-, and Solvent-Free [3+3] Annulation of RCF<sub>2</sub>-Imidoyl Sulfoxonium Ylides with Cyclopropanones to Give Multifunctionalized CF<sub>3</sub>-Pyridones. *J. Org. Chem.* **2022**, *87*, 1124-1132.
4. Caiuby, C. A. D.; de Jesus, M. P.; Burtoloso, A. C. B.  $\alpha$ -Imino Iridium Carbenes from Imidoyl Sulfoxonium Ylides: Application in the One-Step Synthesis of Indoles. *J. Org. Chem.* **2020**, *85*, 7433-7445.
5. Wang, R.; Liu, W. H. Decarboxylative Enamide Synthesis from Carboxylic Acid and Alkenyl Isocyanate. *Org. Lett.*, **2023**, *25*, 5231-5235.
6. Yu, T.-Y.; Zheng, Z.-J.; Dang, T.-T.; Zhang, F.-X.; Wei, H. Synthesis of Acyl Azides from 1,3-Diketones via Oxidative Cleavage of Two C–C Bonds. *J. Org. Chem.* **2018**, *83*, 10589-10594.
7. Joseph, D.; Lee, S. Reaction of Amide and Sodium Azide for the Synthesis of Acyl Azide, Urea, and Iminophosphorane. *Org. Lett.* **2022**, *24*, 6186-6191.
8. Yadav, V. K.; Srivastava, V. P.; Yadav, L. D. S. Visible light induced azidation of aldehydic C–H with carbon tetrabromide and sodium azide. *Tetrahedron Lett.* **2016**, *57*, 2502-2505.
9. Wang, H.; Wang, L.; Ma, N.; Zhu, W.; Huo, B.; Zhu, A.; Li, L. Access to Photostability-Enhanced Unnatural Base Pairs via Local Structural Modifications. *ACS Synthetic Biology*. **2022**, *11*, 334-342.

## 10. Copies of the NMR spectra

### <sup>1</sup>H NMR (400 MHz, CDCl<sub>3</sub>) spectrum of 1n

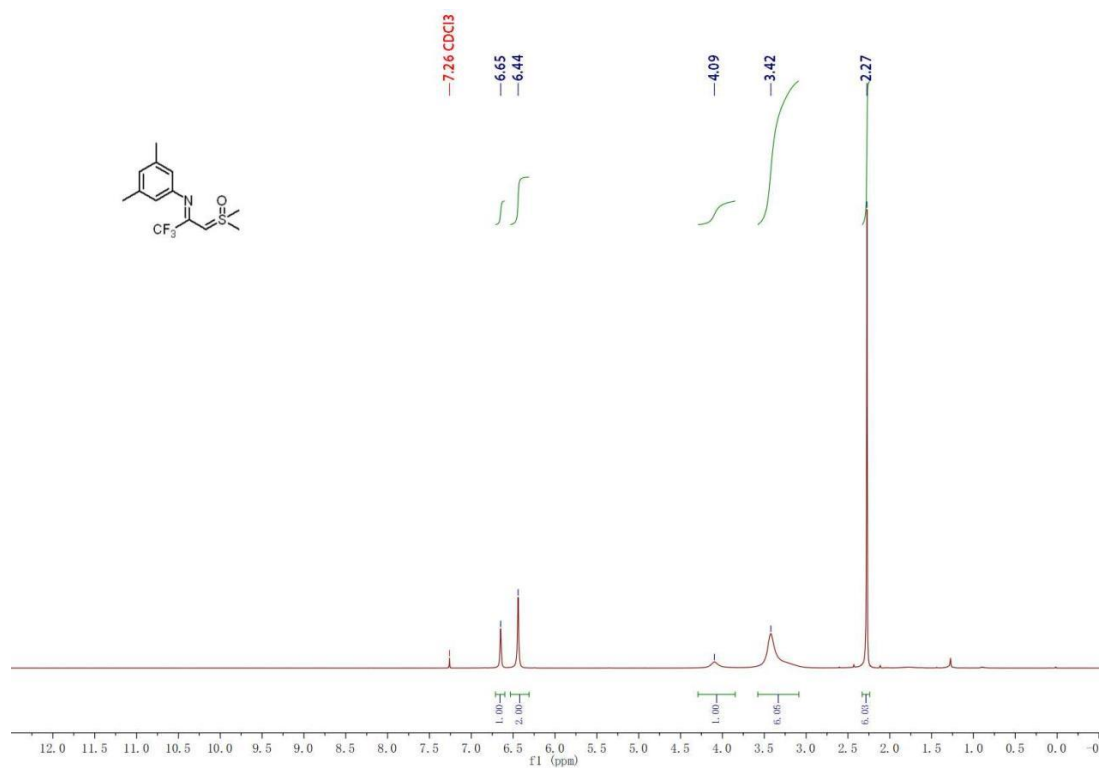

### <sup>13</sup>C NMR (100 MHz, CDCl<sub>3</sub>) spectrum of 1n

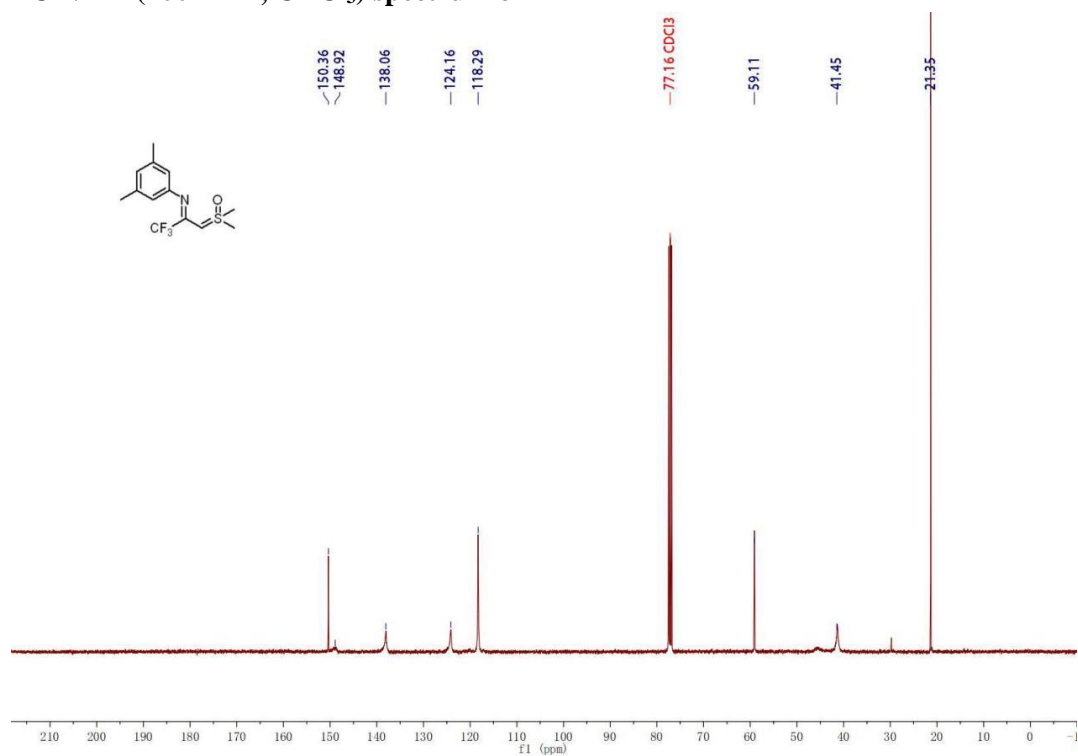

**<sup>19</sup>F NMR (376 MHz, CDCl<sub>3</sub>) spectrum of 1n**

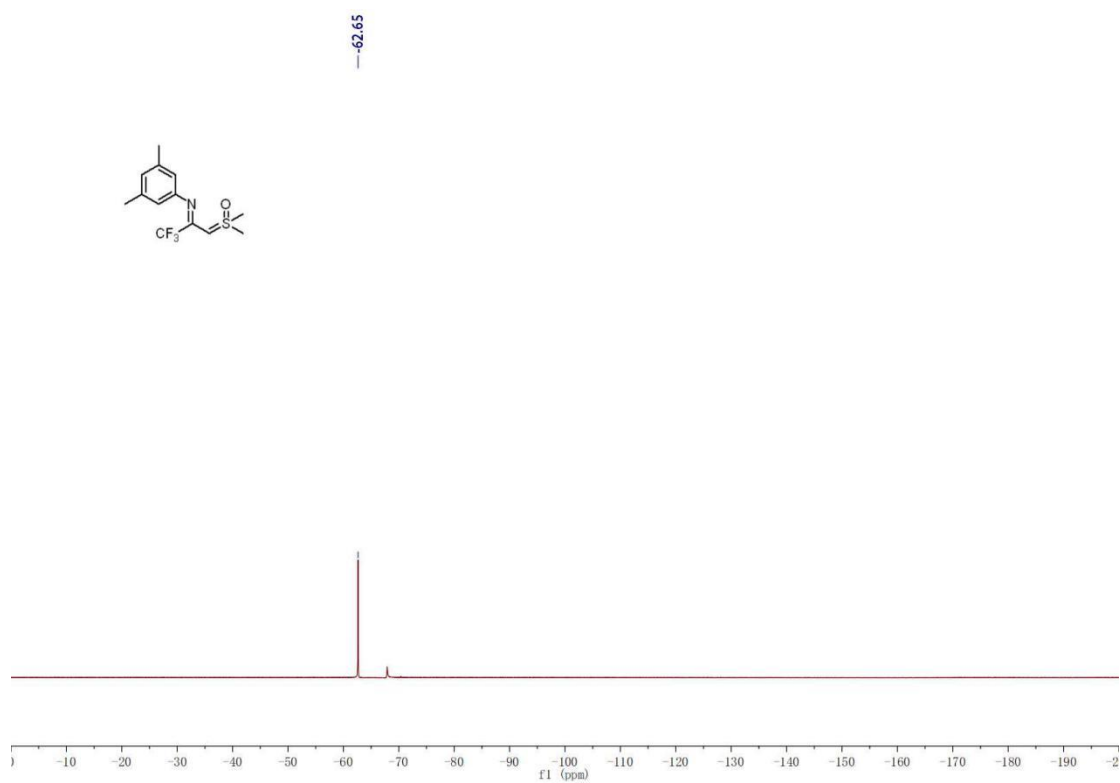

**<sup>1</sup>H NMR (400 MHz, CDCl<sub>3</sub>) spectrum of 2n**

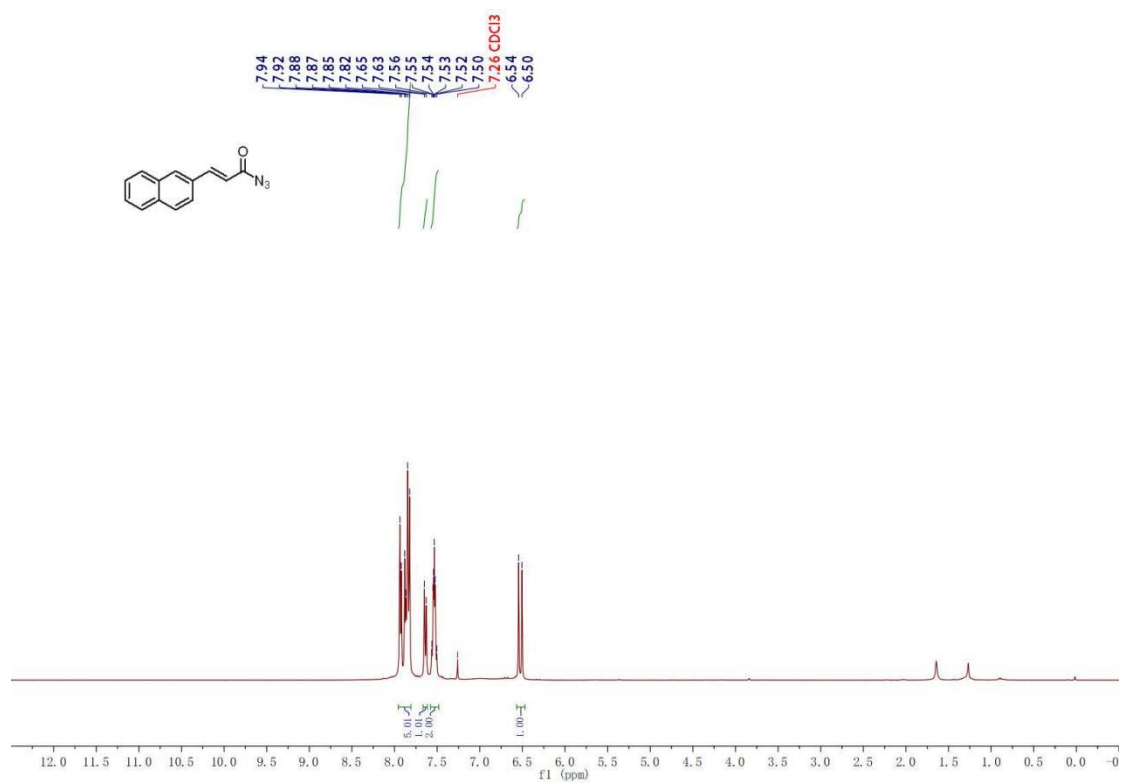

**<sup>13</sup>C NMR (100 MHz, CDCl<sub>3</sub>) spectrum of 2n**

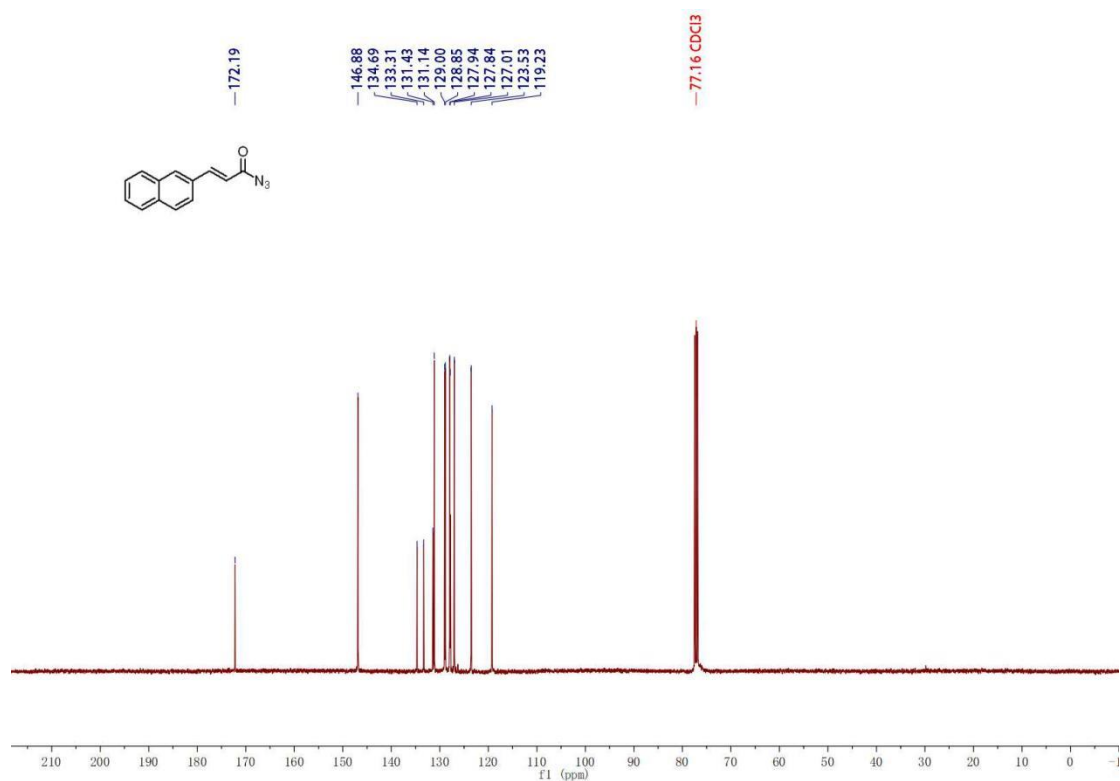

**<sup>1</sup>H NMR (400 MHz, Acetone-d<sub>6</sub>) spectrum of 3aa**

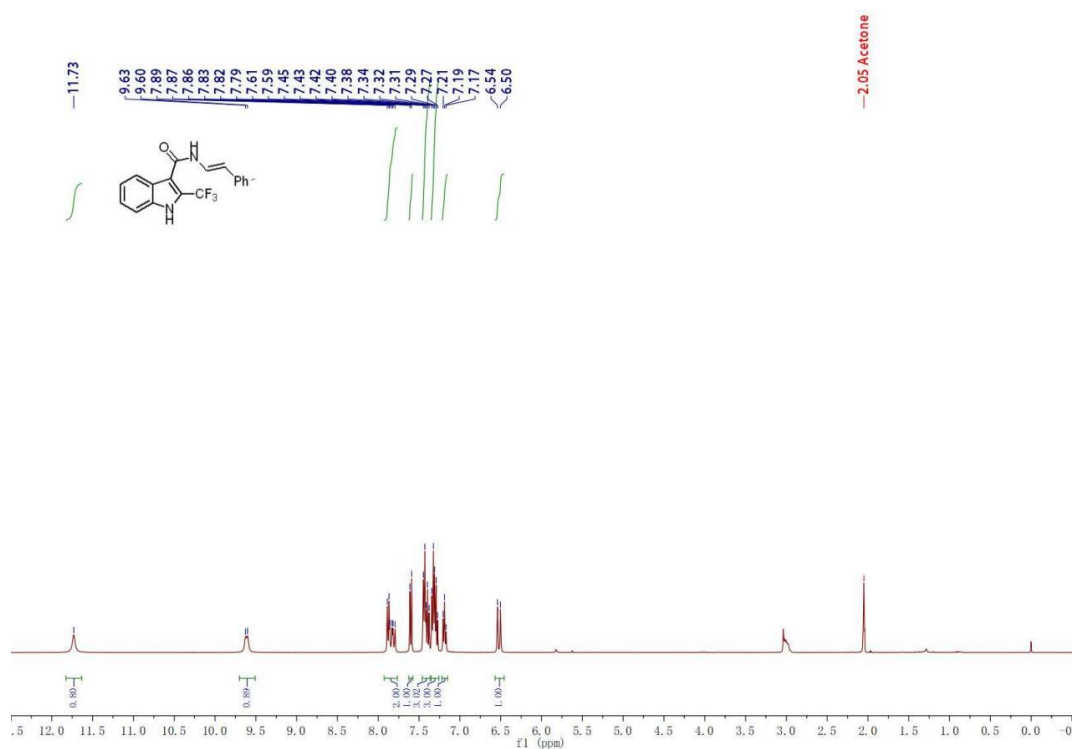

**<sup>13</sup>C NMR (100 MHz, Acetone-*d*<sub>6</sub>) spectrum of 3aa**

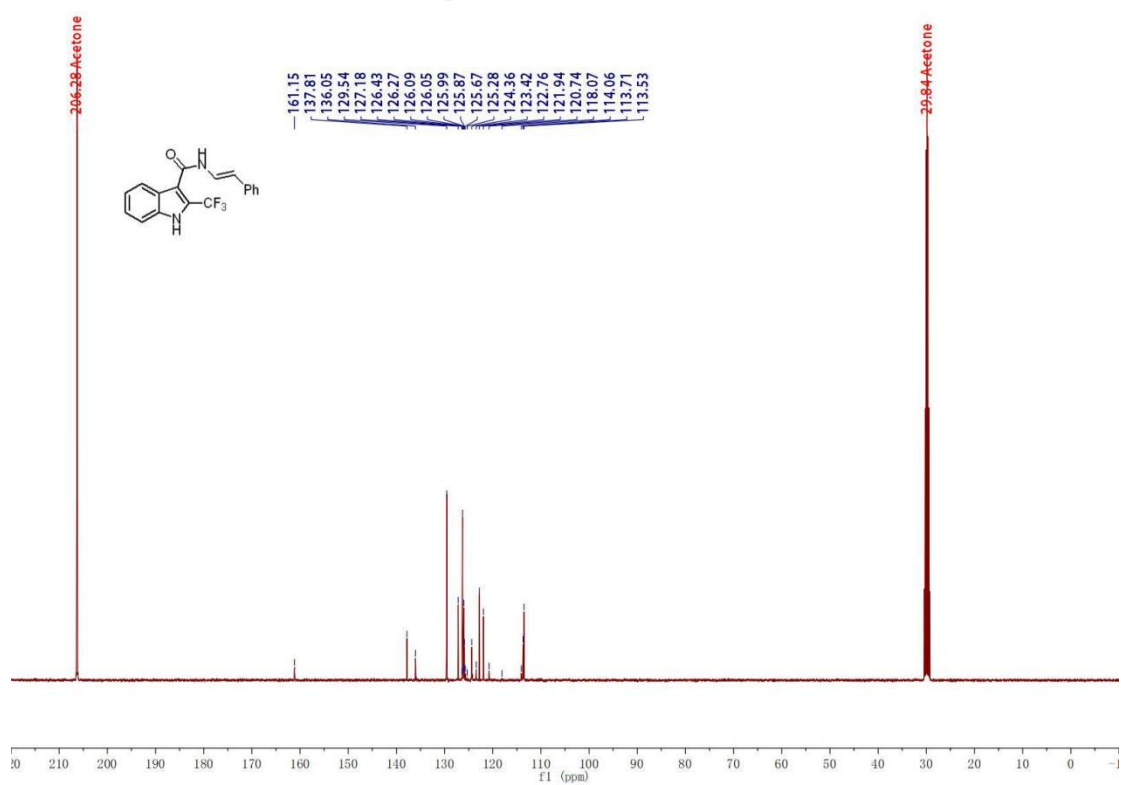

**<sup>19</sup>F NMR (376 MHz, Acetone-*d*<sub>6</sub>) spectrum of 3aa**

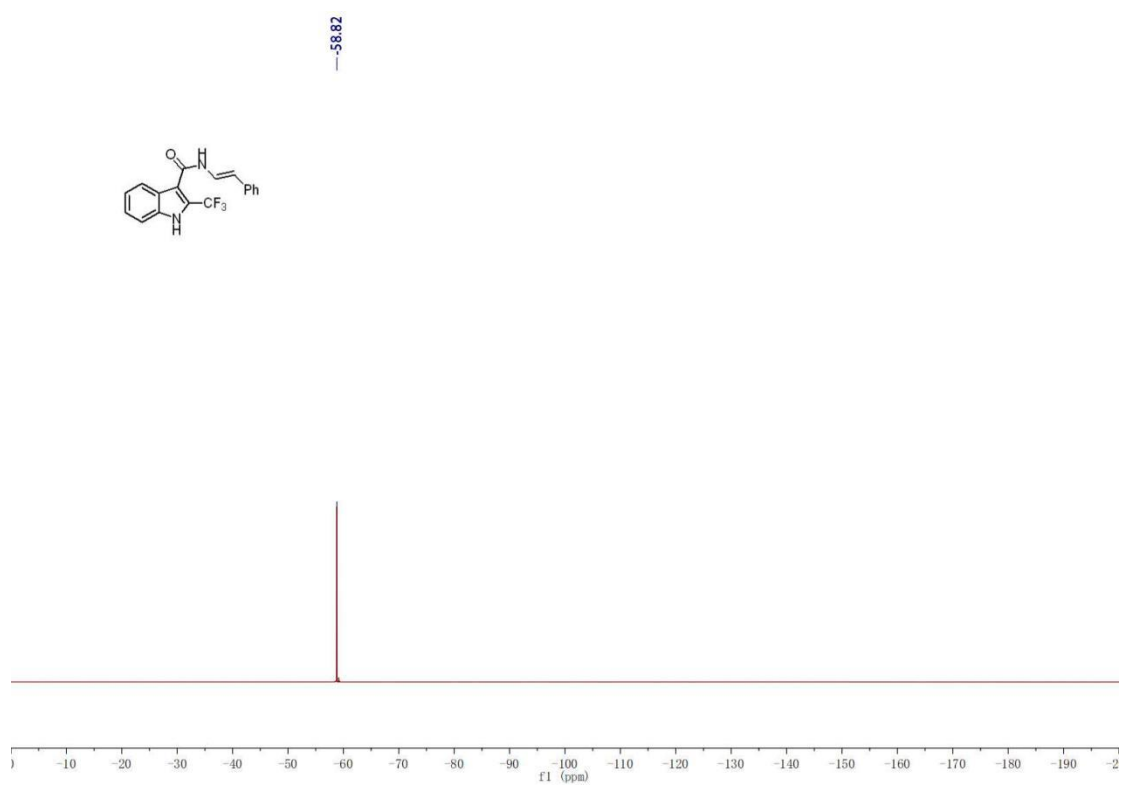



**<sup>1</sup>H NMR (400 MHz, CDCl<sub>3</sub>) spectrum of 3ba**

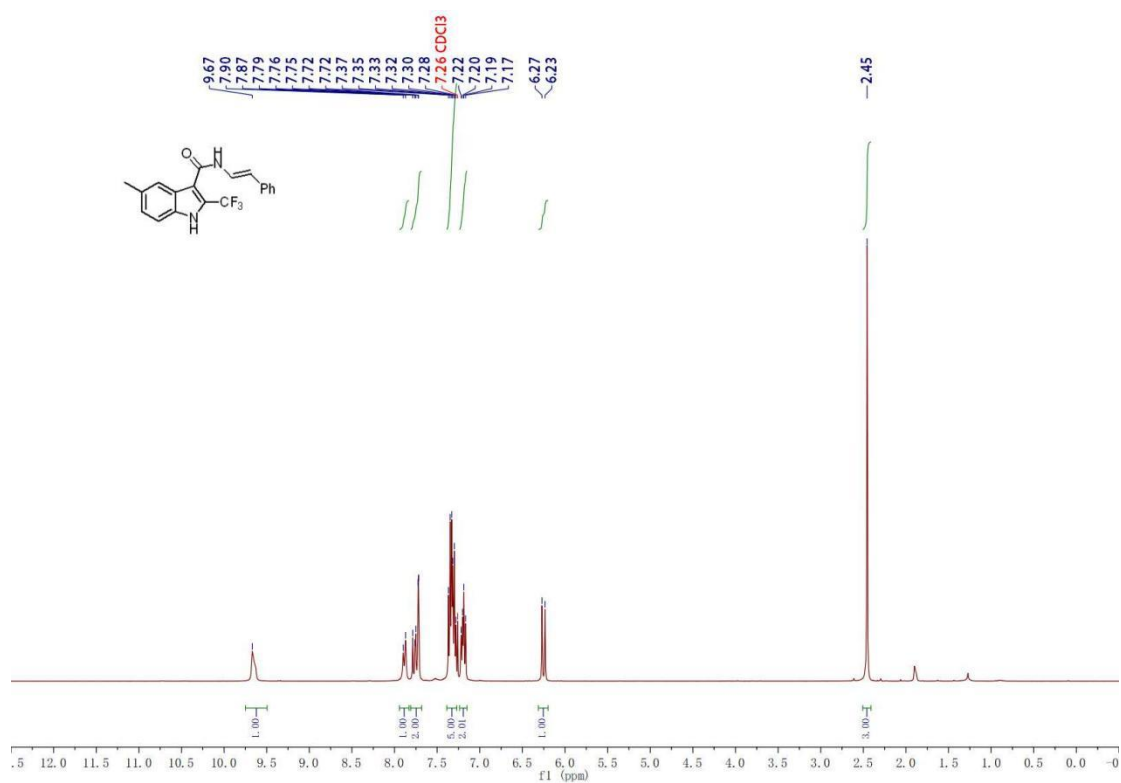

**<sup>13</sup>C NMR (100 MHz, CDCl<sub>3</sub>) spectrum of 3ba**

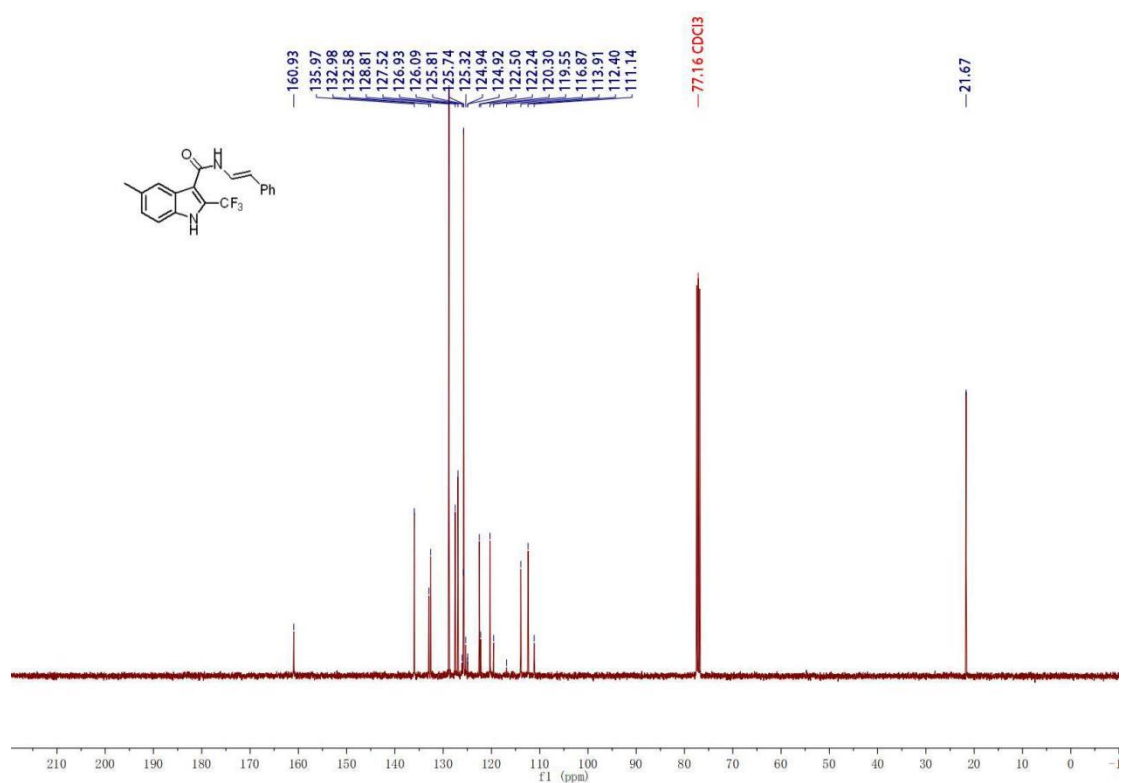

**$^{19}\text{F}$  NMR (376 MHz,  $\text{CDCl}_3$ ) spectrum of 3ba**

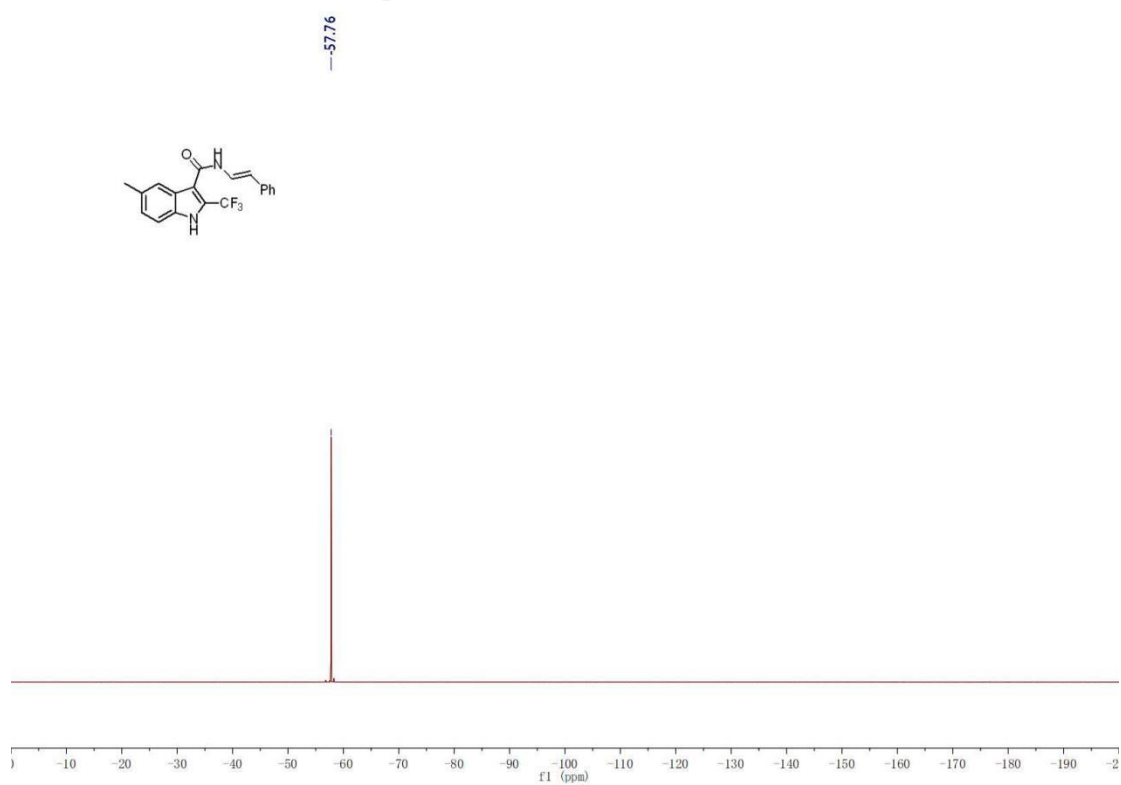

**$^1\text{H}$  NMR (400 MHz, Acetone- $d_6$ ) spectrum of 3ca**

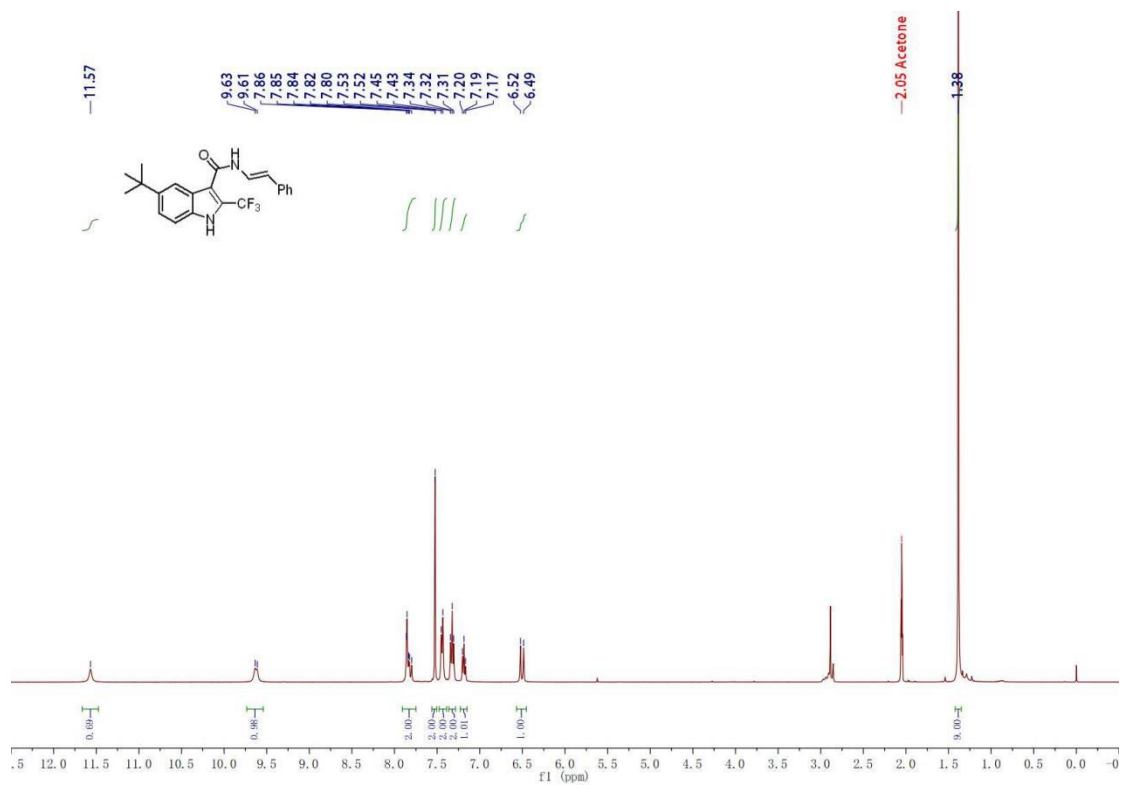

**<sup>13</sup>C NMR (100 MHz, Acetone-*d*<sub>6</sub>) spectrum of 3ca**

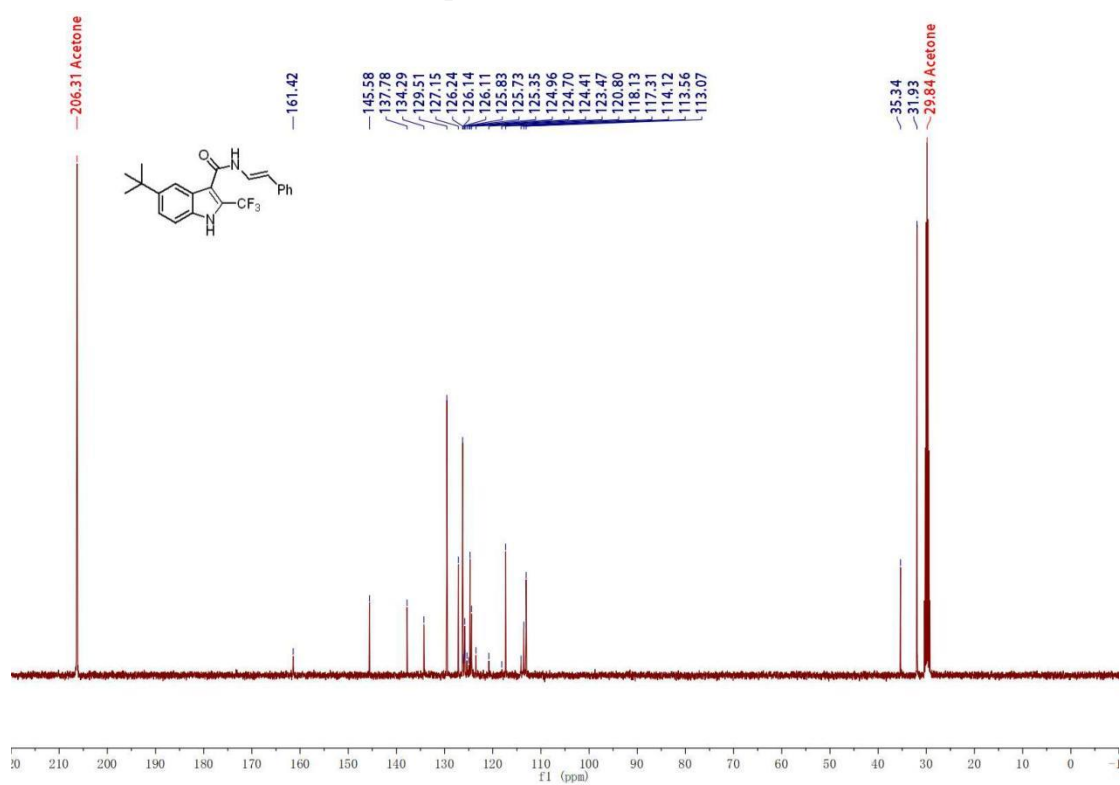

**<sup>19</sup>F NMR (376 MHz, Acetone-*d*<sub>6</sub>) spectrum of 3ca**

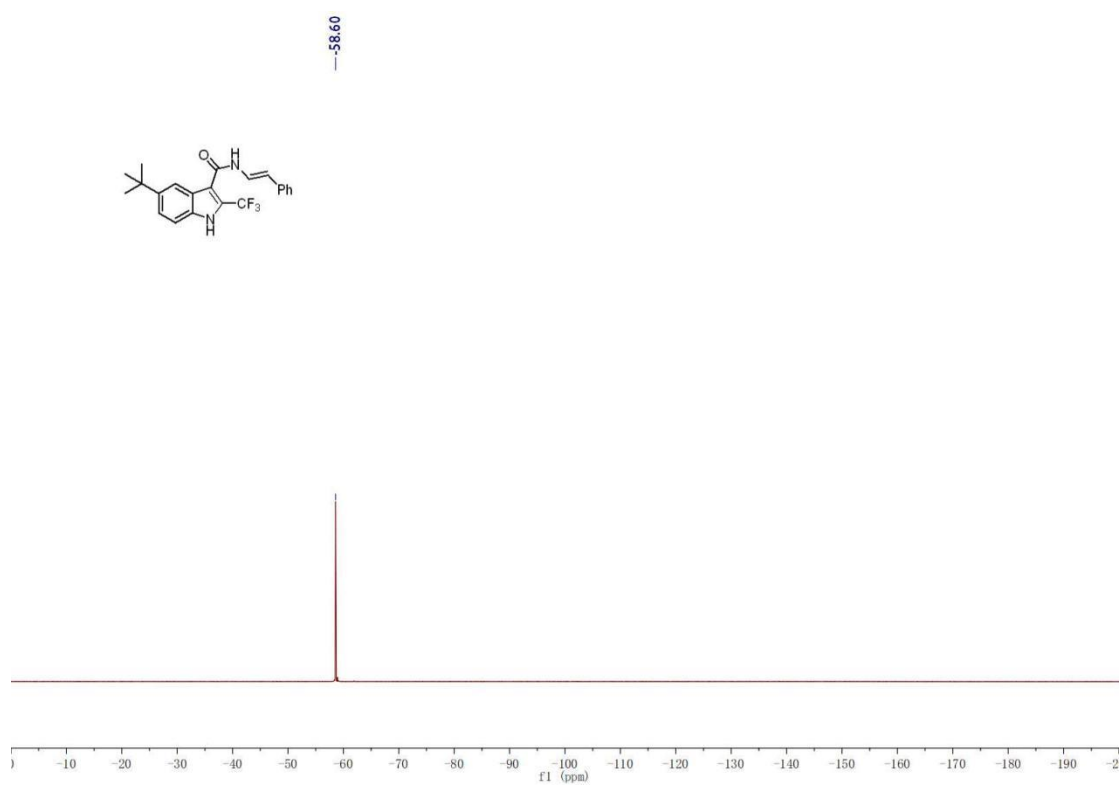

**<sup>1</sup>H NMR (400 MHz, Acetone-*d*<sub>6</sub>) spectrum of 3da**

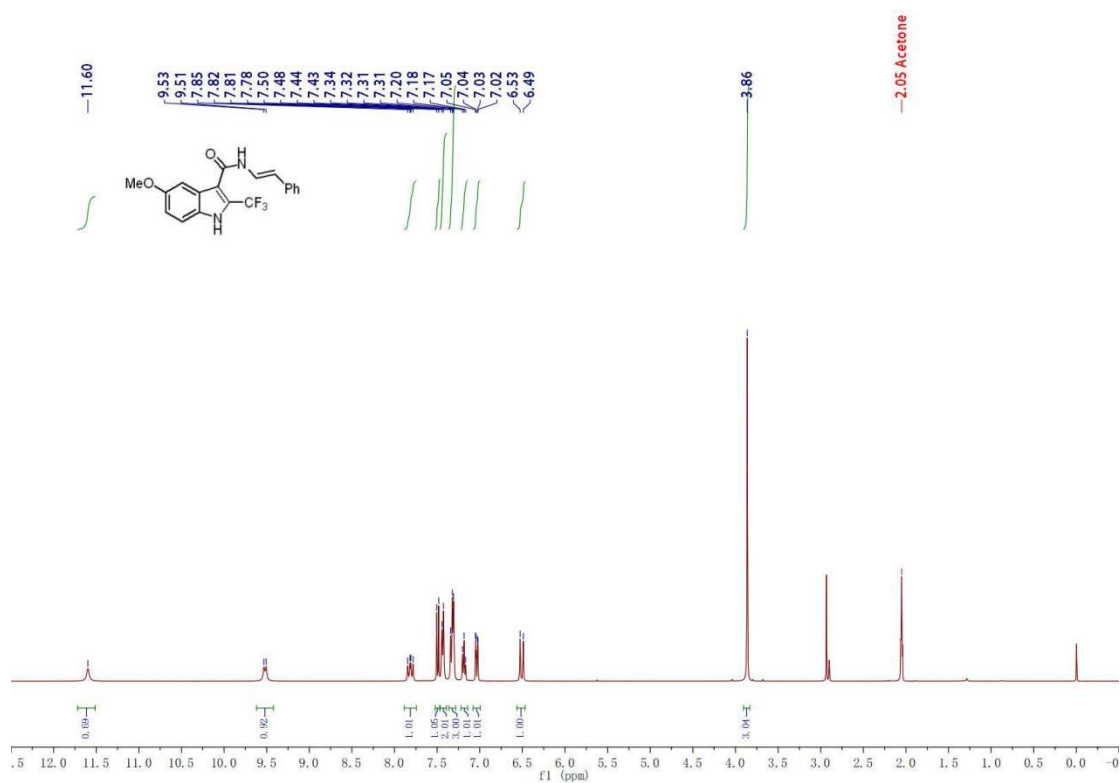

**<sup>13</sup>C NMR (100 MHz, Acetone-*d*<sub>6</sub>) spectrum of 3da**

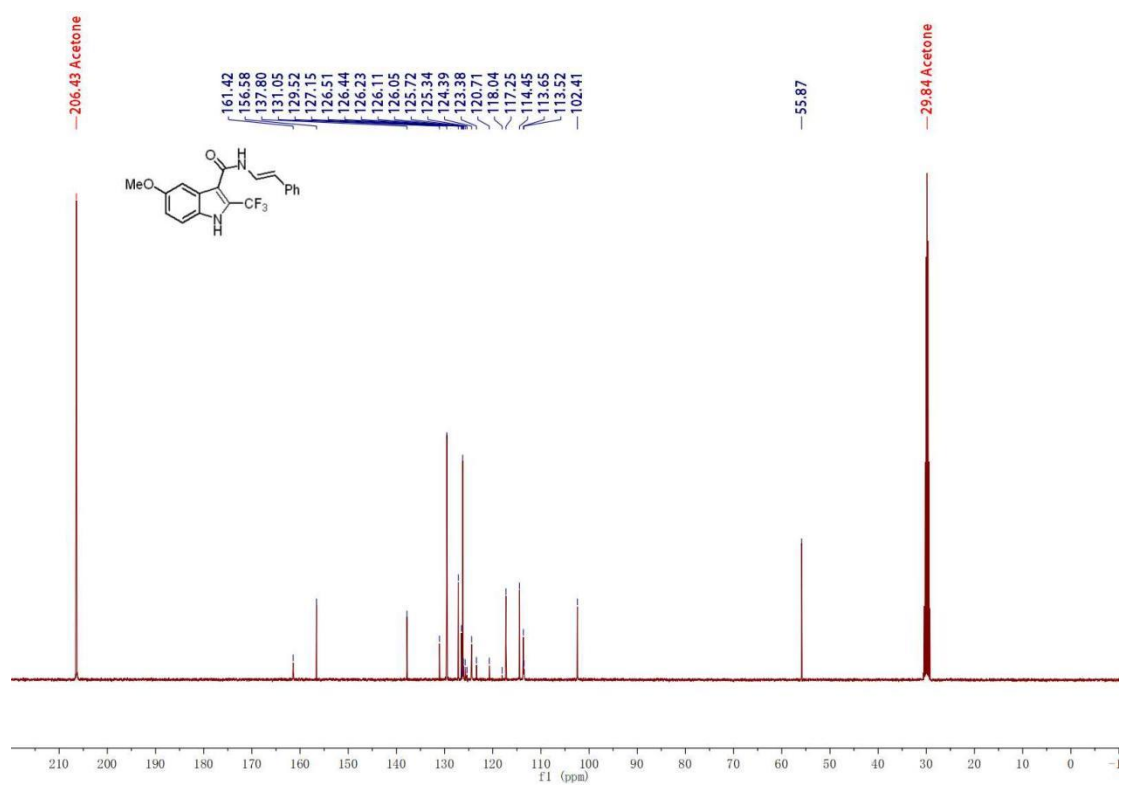

**<sup>19</sup>F NMR (376 MHz, Acetone-*d*<sub>6</sub>) spectrum of 3da**

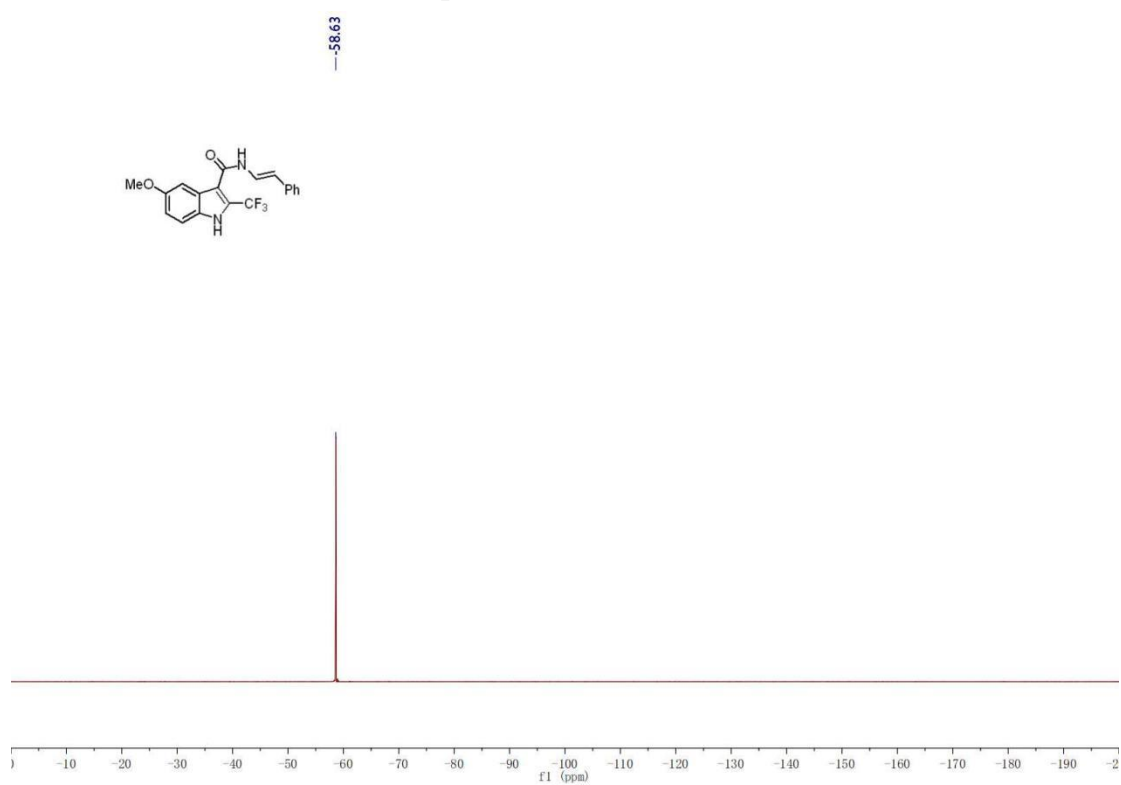

**<sup>1</sup>H NMR (400 MHz, Acetone-*d*<sub>6</sub>) spectrum of 3ea**

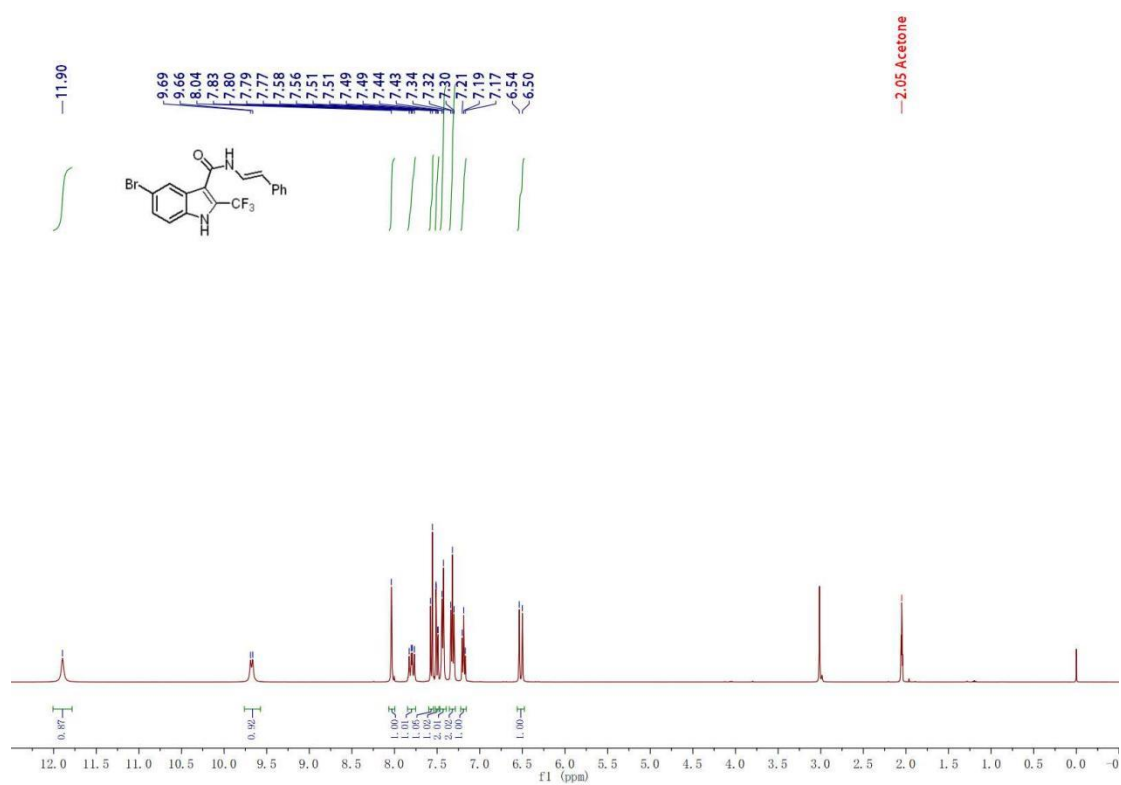

**<sup>13</sup>C NMR (100 MHz, Acetone-*d*<sub>6</sub>) spectrum of 3ea**

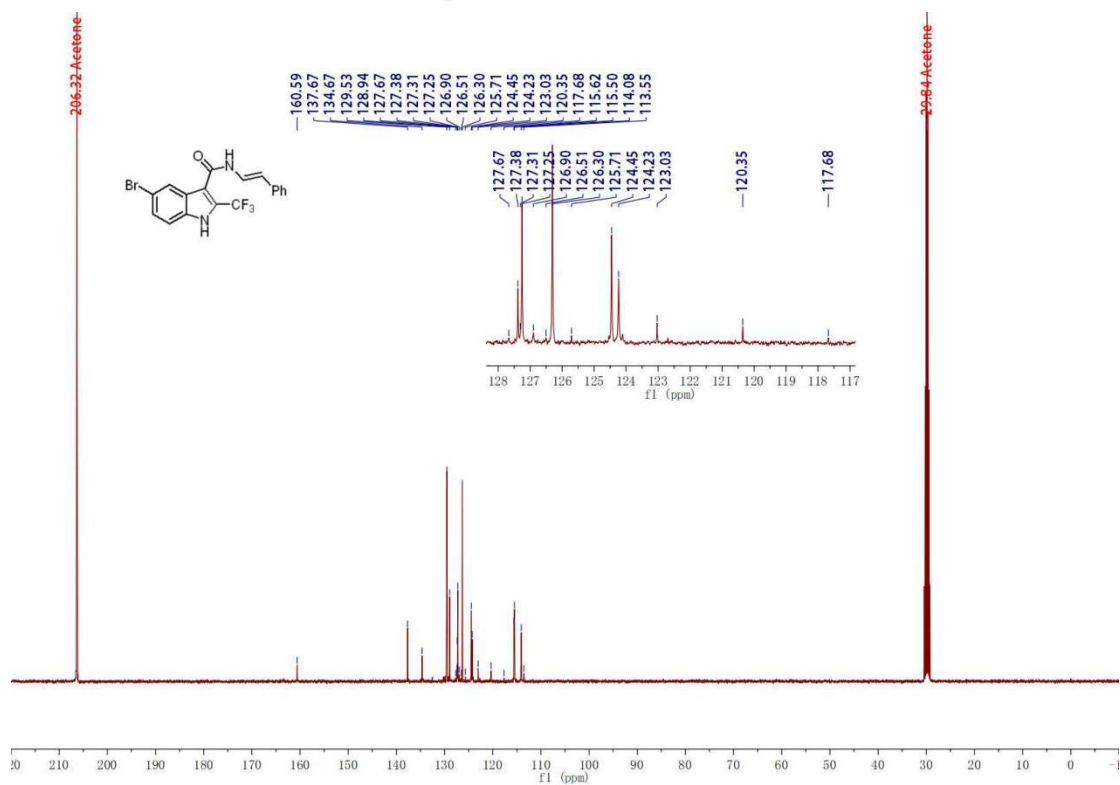

**<sup>19</sup>F NMR (376 MHz, Acetone-*d*<sub>6</sub>) spectrum of 3ea**

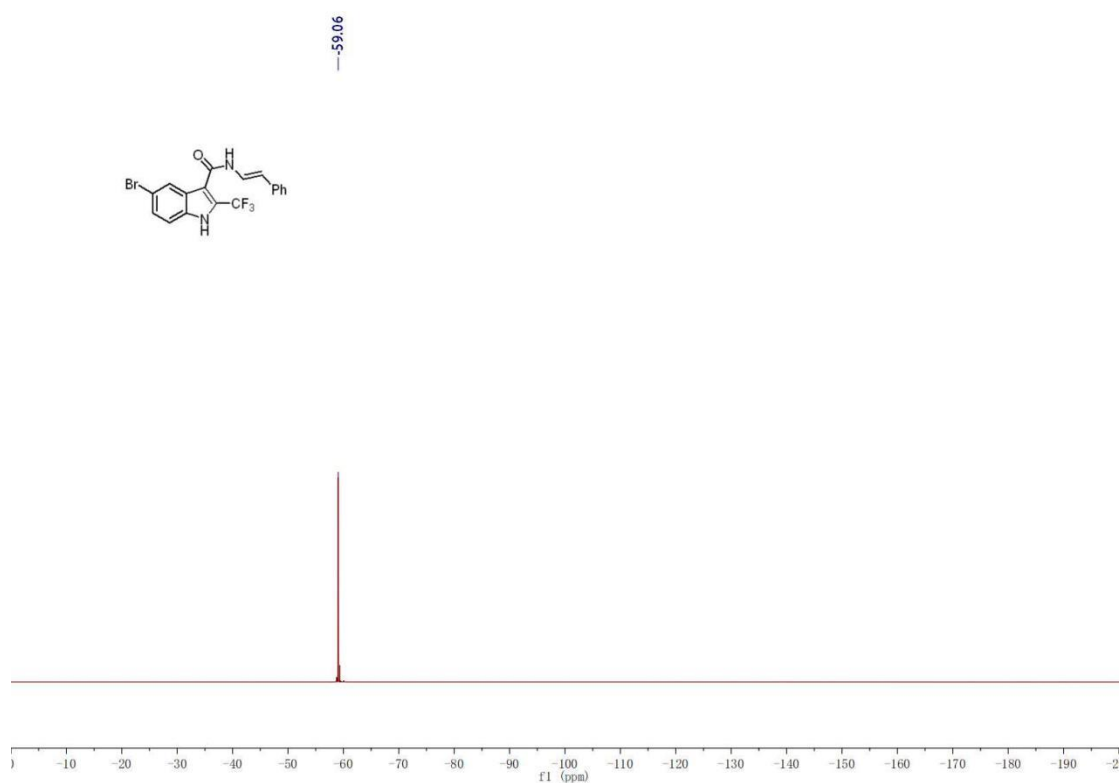

### <sup>1</sup>H NMR (400 MHz, Acetone-*d*<sub>6</sub>) spectrum of 3fa

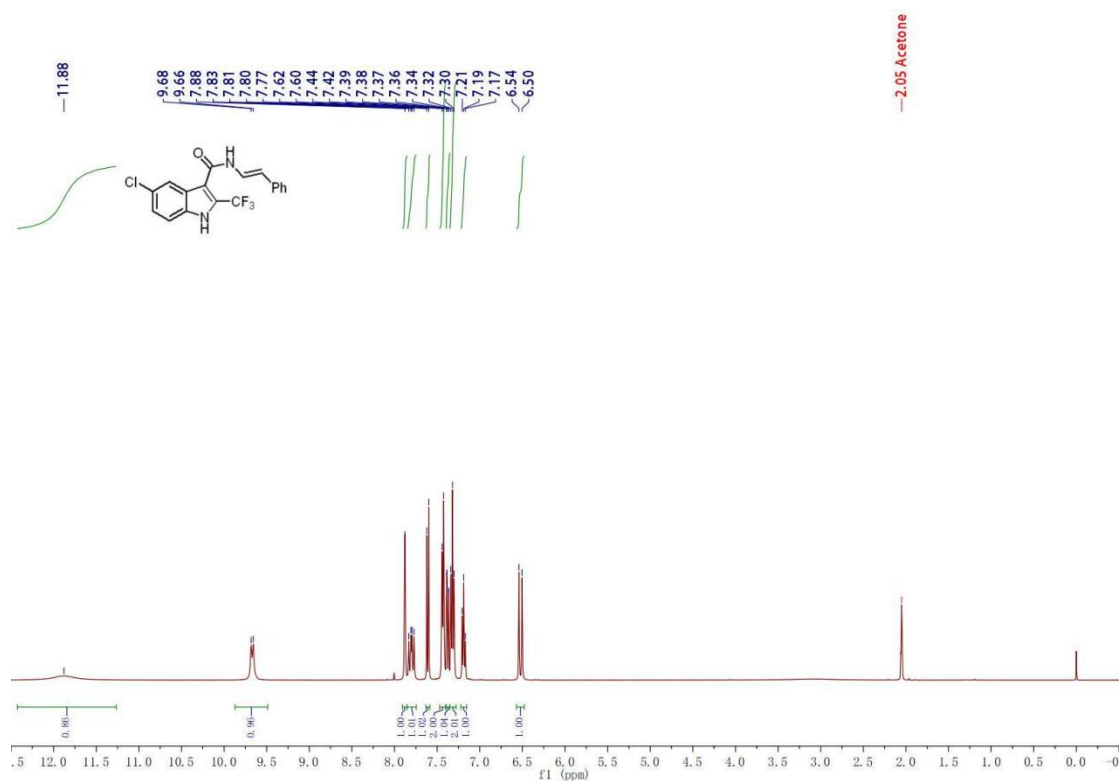

### <sup>13</sup>C NMR (100 MHz, Acetone-*d*<sub>6</sub>) spectrum of 3fa

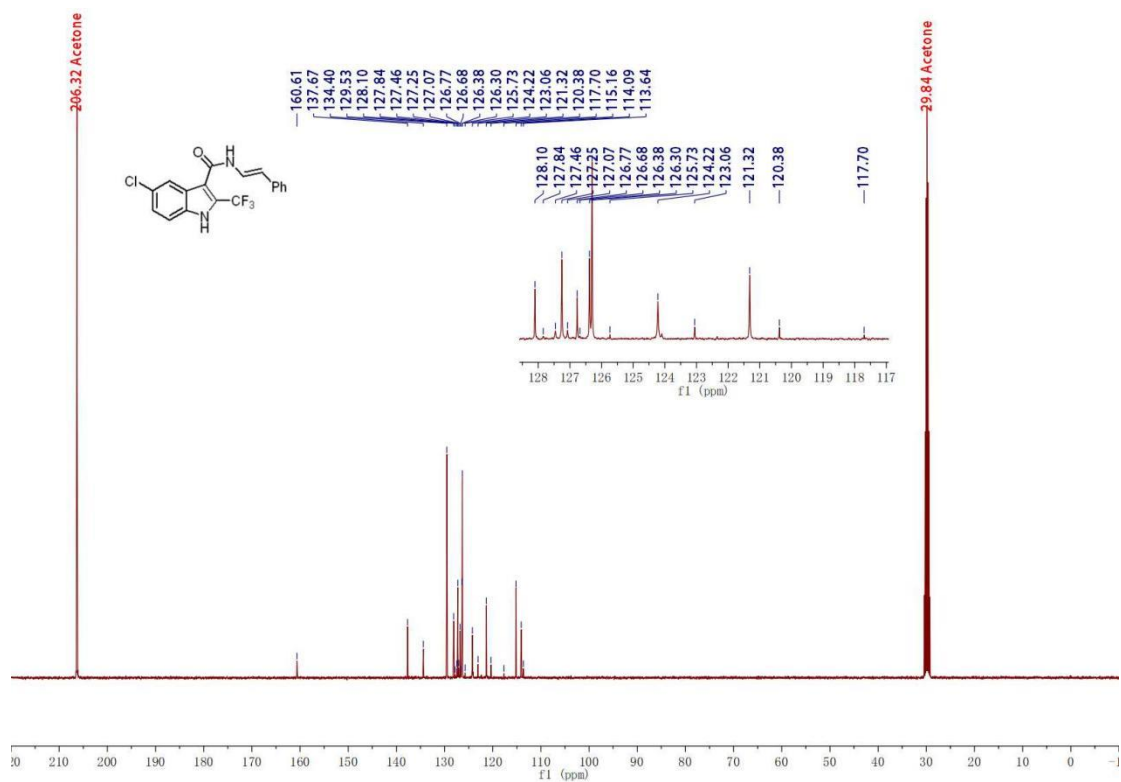

**<sup>19</sup>F NMR (376 MHz, Acetone-*d*<sub>6</sub>) spectrum of 3fa**

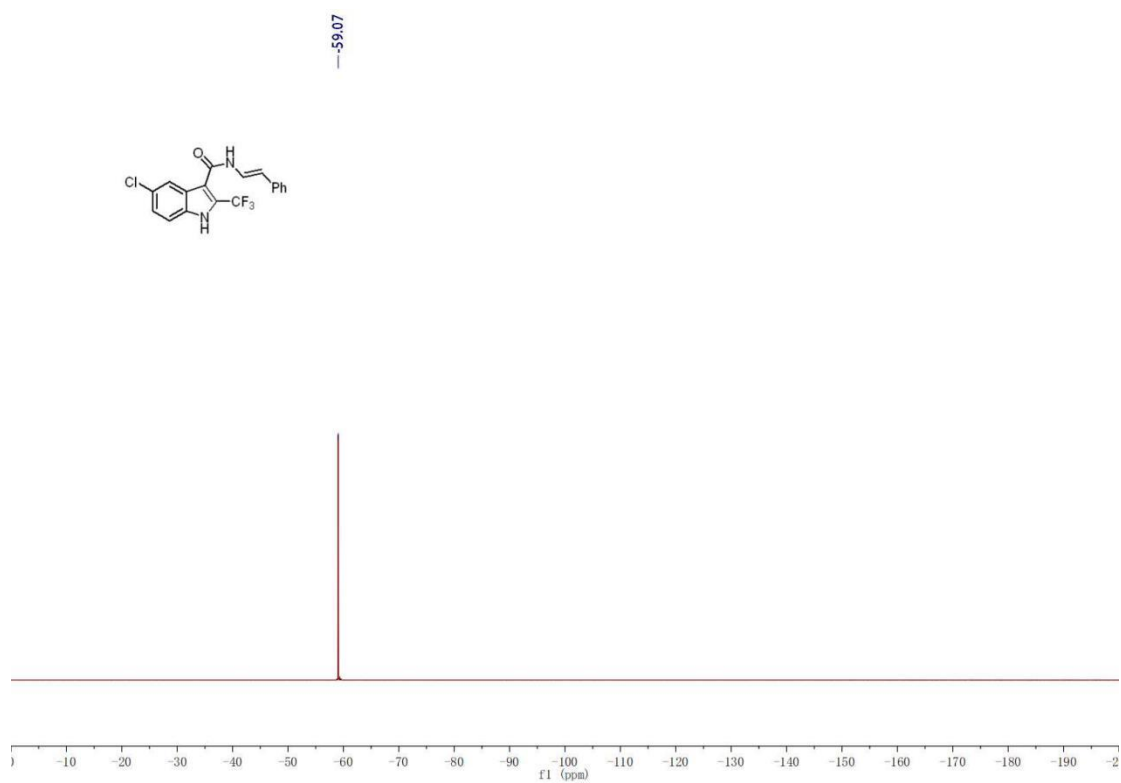

**<sup>1</sup>H NMR (400 MHz, Acetone-*d*<sub>6</sub>) spectrum of 3ga**

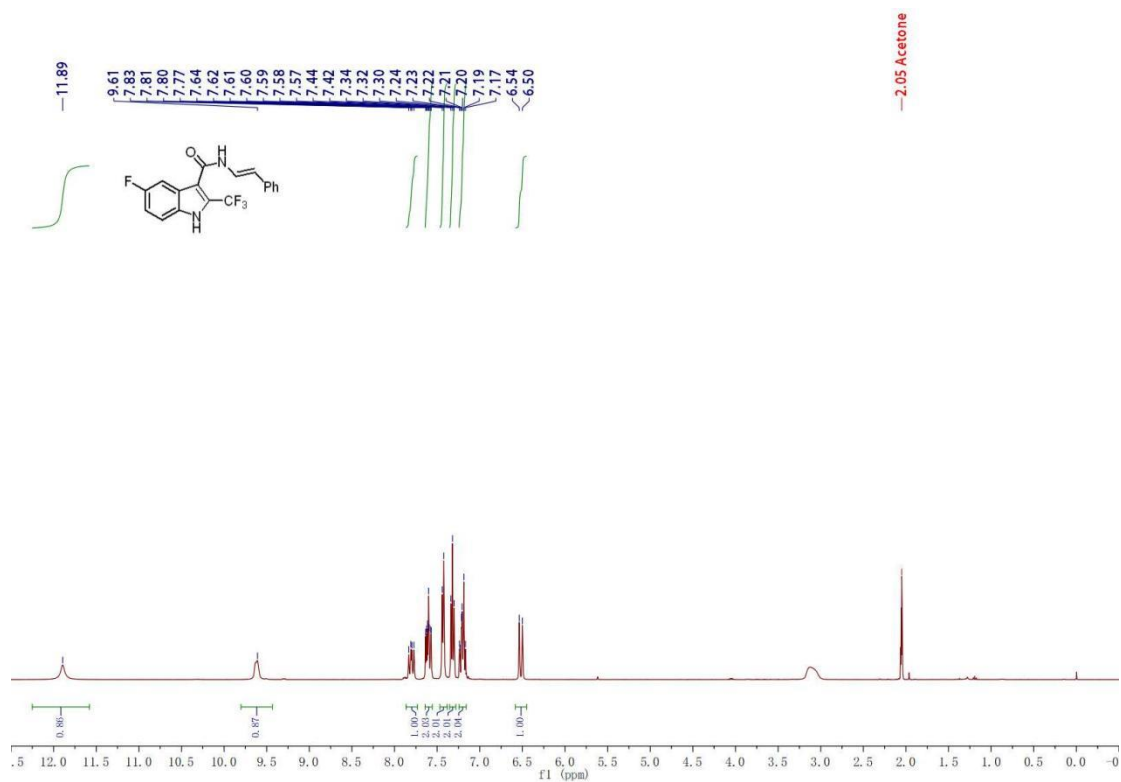



**<sup>13</sup>C NMR (100 MHz, Acetone-*d*<sub>6</sub>) spectrum of 3ga**

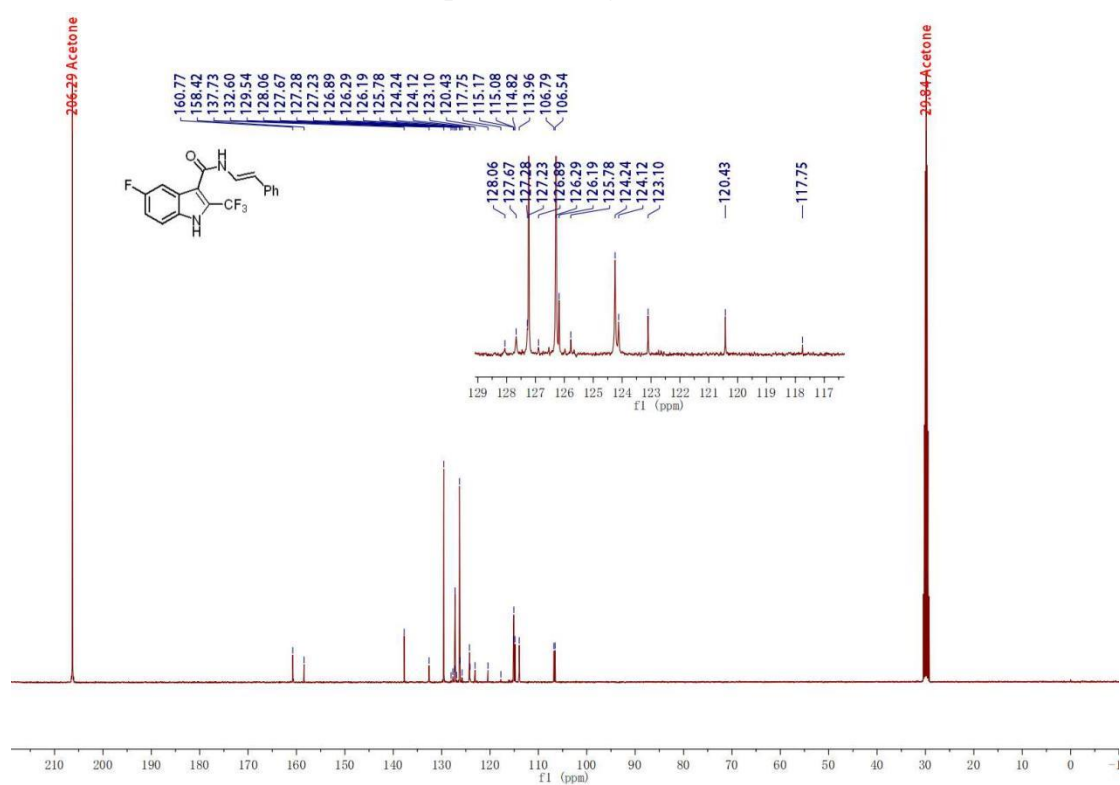

**<sup>19</sup>F NMR (376 MHz, Acetone-*d*<sub>6</sub>) spectrum of 3ga**

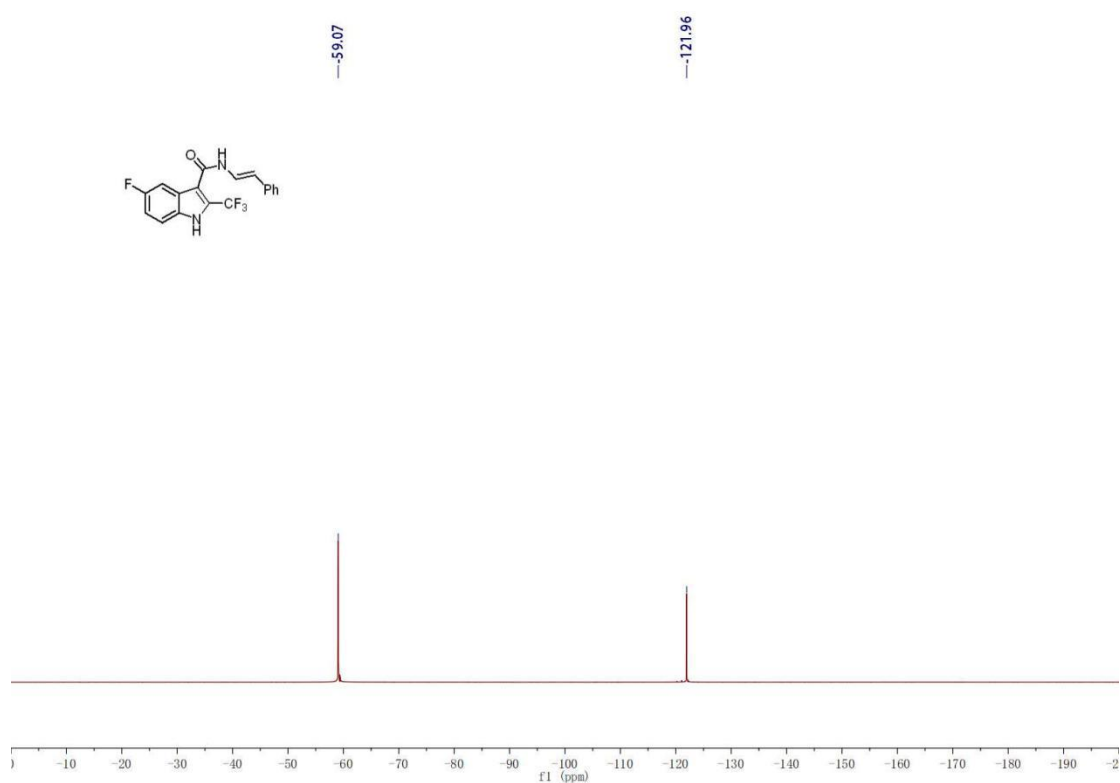

**<sup>1</sup>H NMR (400 MHz, Acetone-*d*<sub>6</sub>) spectrum of 3ha**

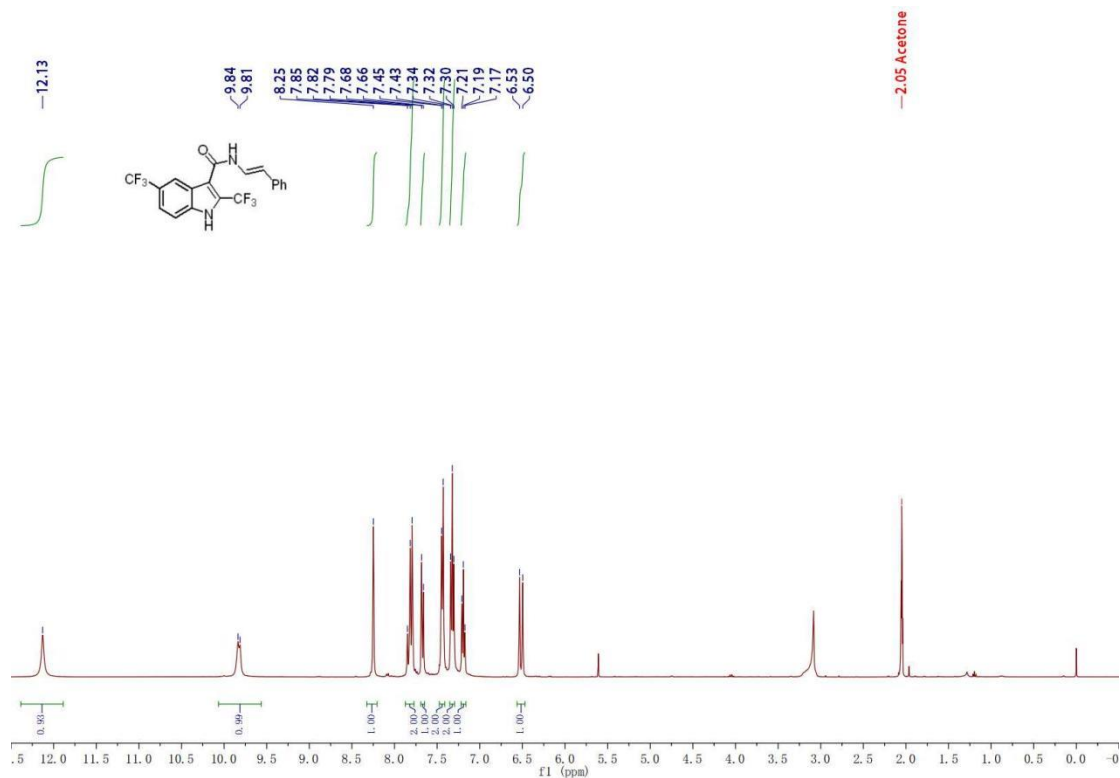

**<sup>13</sup>C NMR (100 MHz, Acetone-*d*<sub>6</sub>) spectrum of 3ha**

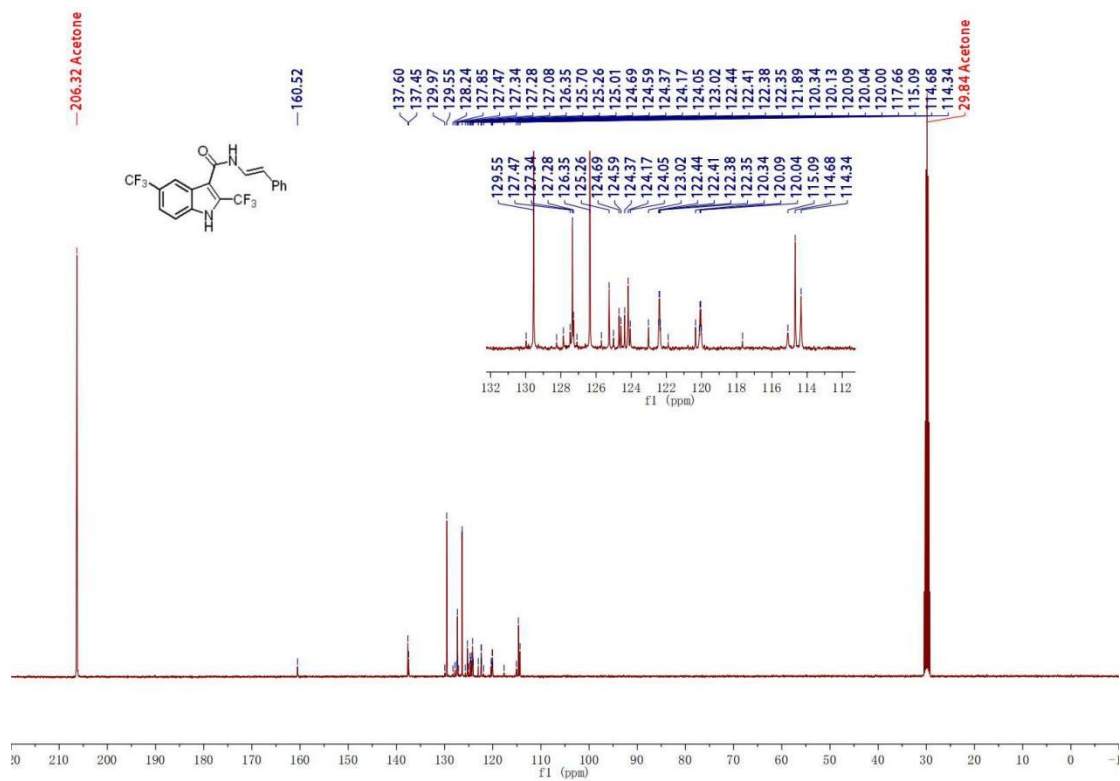

**<sup>19</sup>F NMR (376 MHz, Acetone-*d*<sub>6</sub>) spectrum of 3ha**

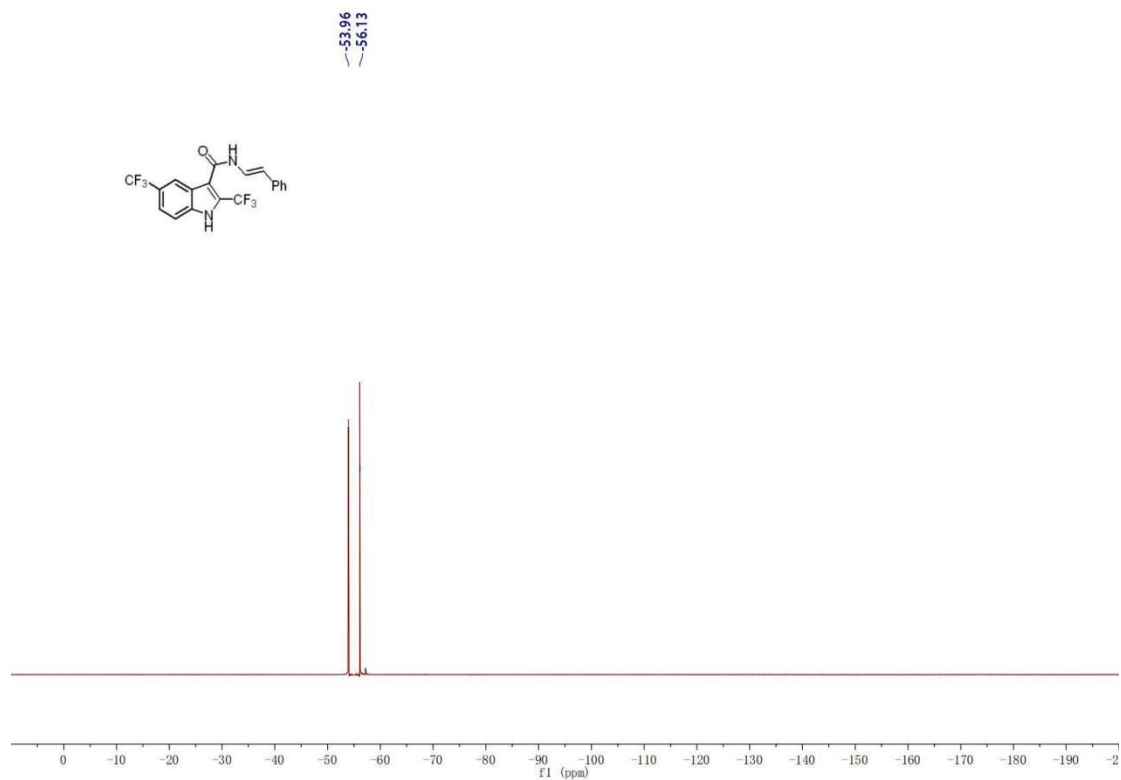

**<sup>1</sup>H NMR (400 MHz, CDCl<sub>3</sub>) spectrum of 3ia**

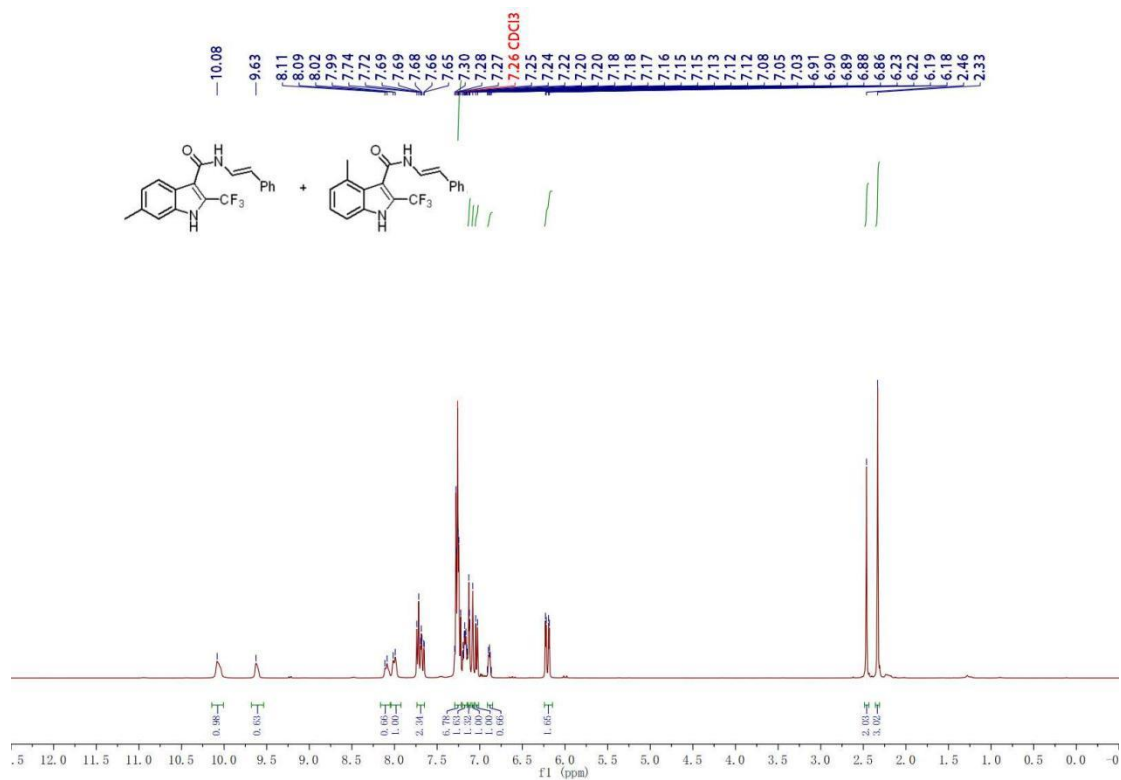

**<sup>13</sup>C NMR (150 MHz, CDCl<sub>3</sub>) spectrum of 3ia**

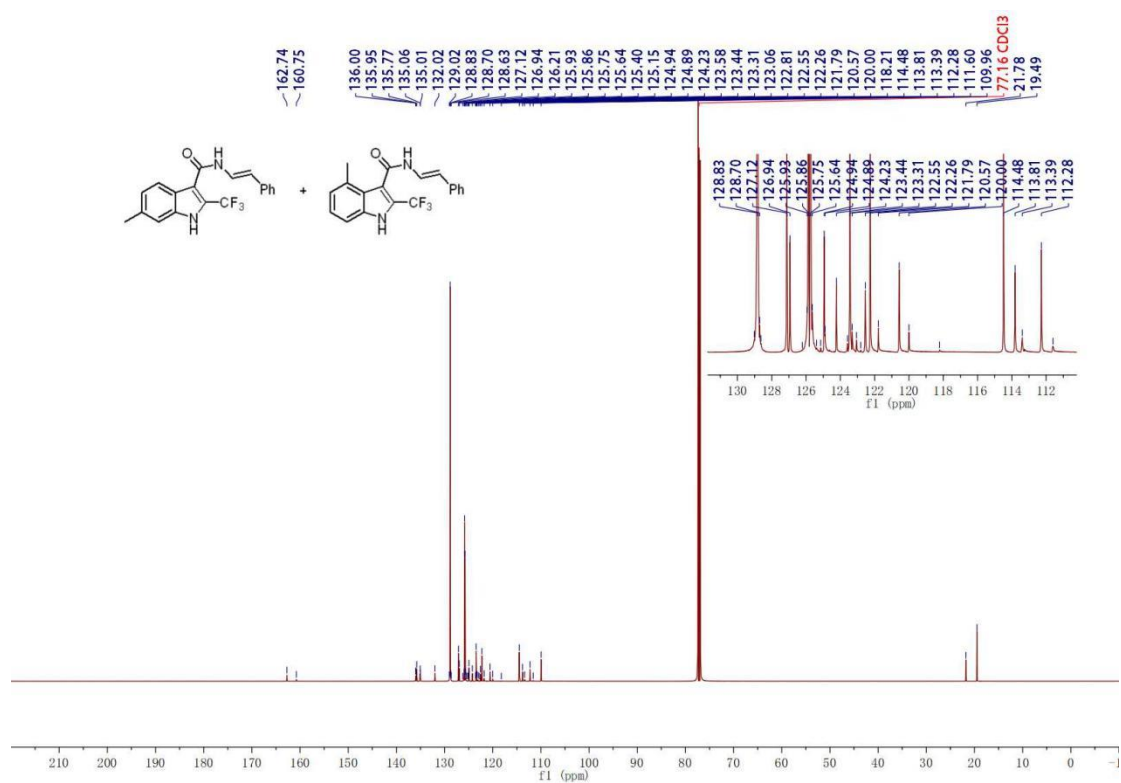

**<sup>19</sup>F NMR (376 MHz, CDCl<sub>3</sub>) spectrum of 3ia**

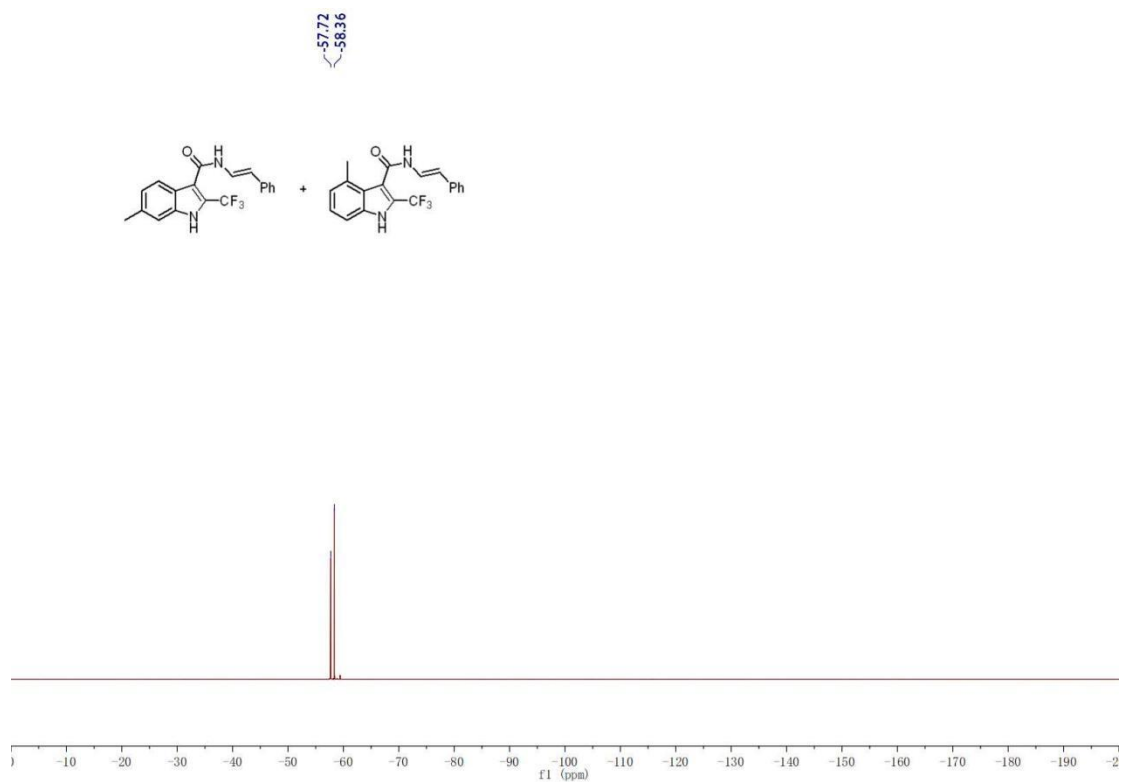

### <sup>1</sup>H NMR (400 MHz, Acetone-d<sub>6</sub>) spectrum of 3ja

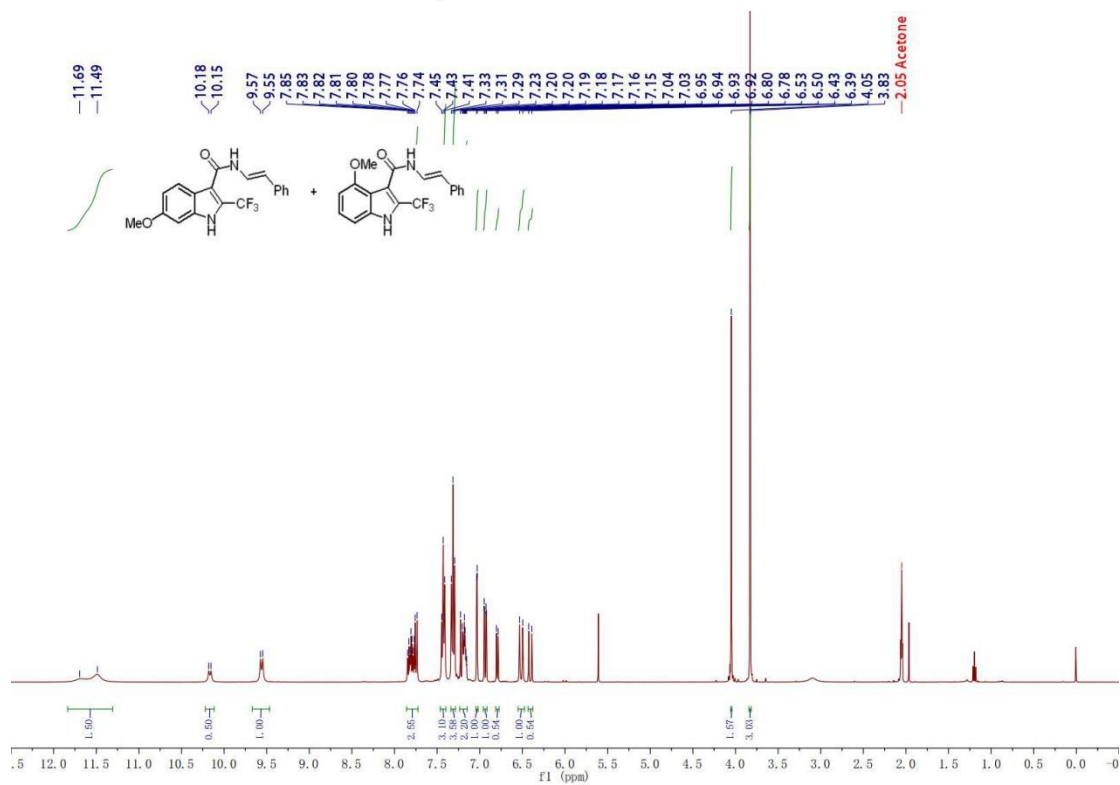

### <sup>13</sup>C NMR (100 MHz, Acetone-d<sub>6</sub>) spectrum of 3ja

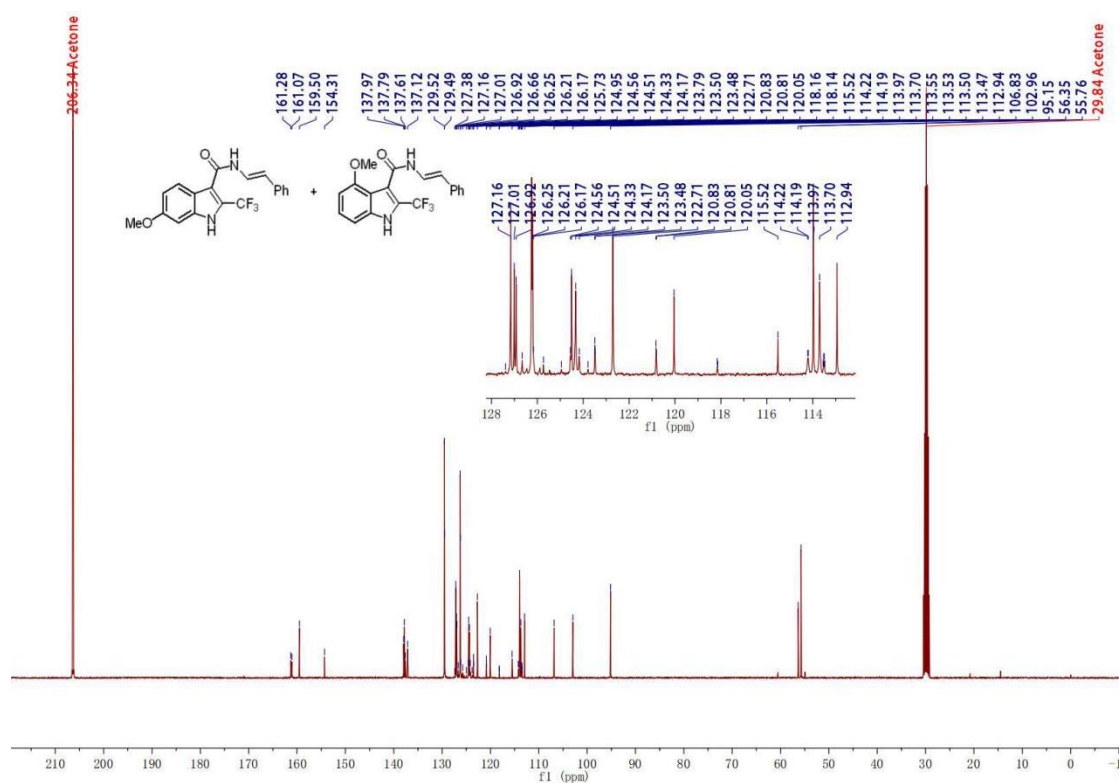

**<sup>19</sup>F NMR (376 MHz, Acetone-*d*<sub>6</sub>) spectrum of 3ja**

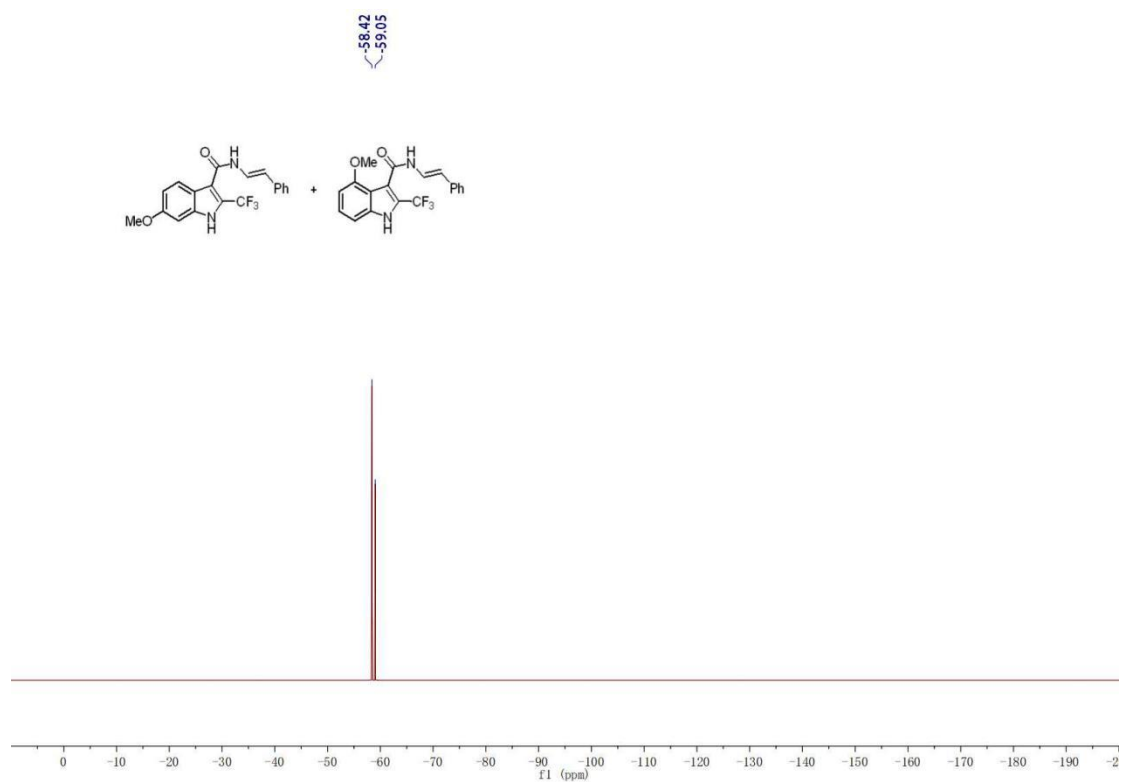

**<sup>1</sup>H NMR (400 MHz, Acetone-*d*<sub>6</sub>) spectrum of 3ka**

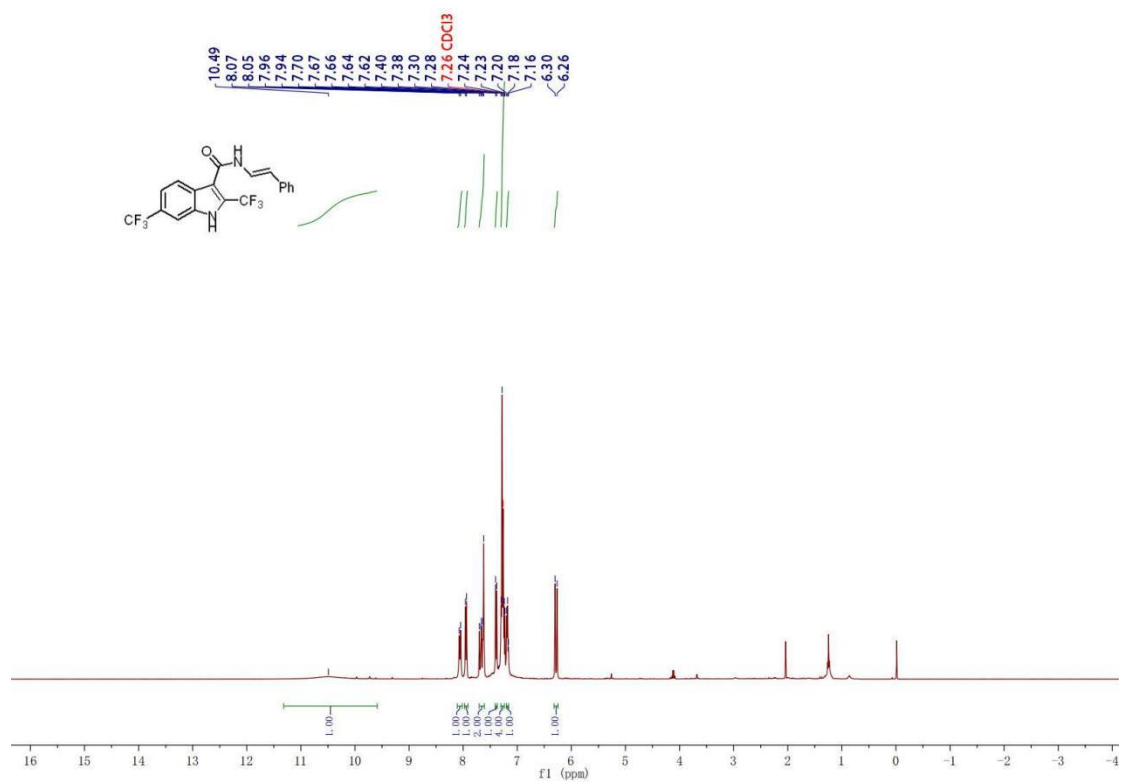

### <sup>13</sup>C NMR (100 MHz, Acetone-*d*<sub>6</sub>) spectrum of 3ka

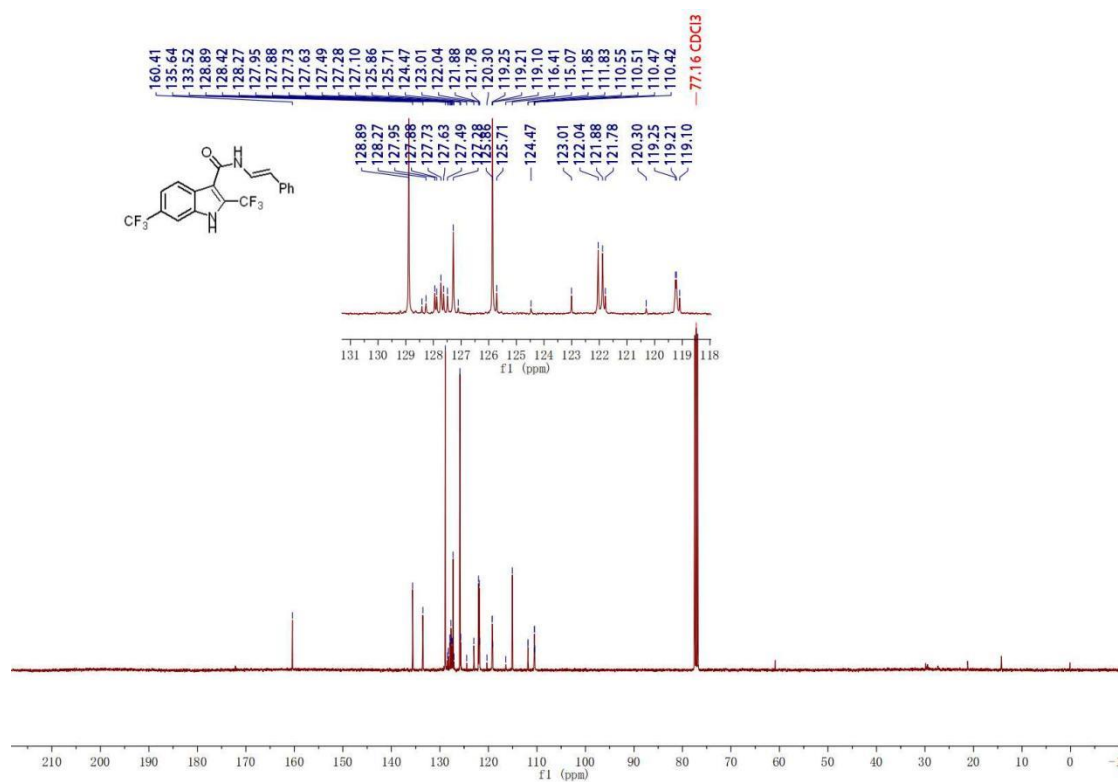

### <sup>19</sup>F NMR (376 MHz, Acetone-*d*<sub>6</sub>) spectrum of 3ka

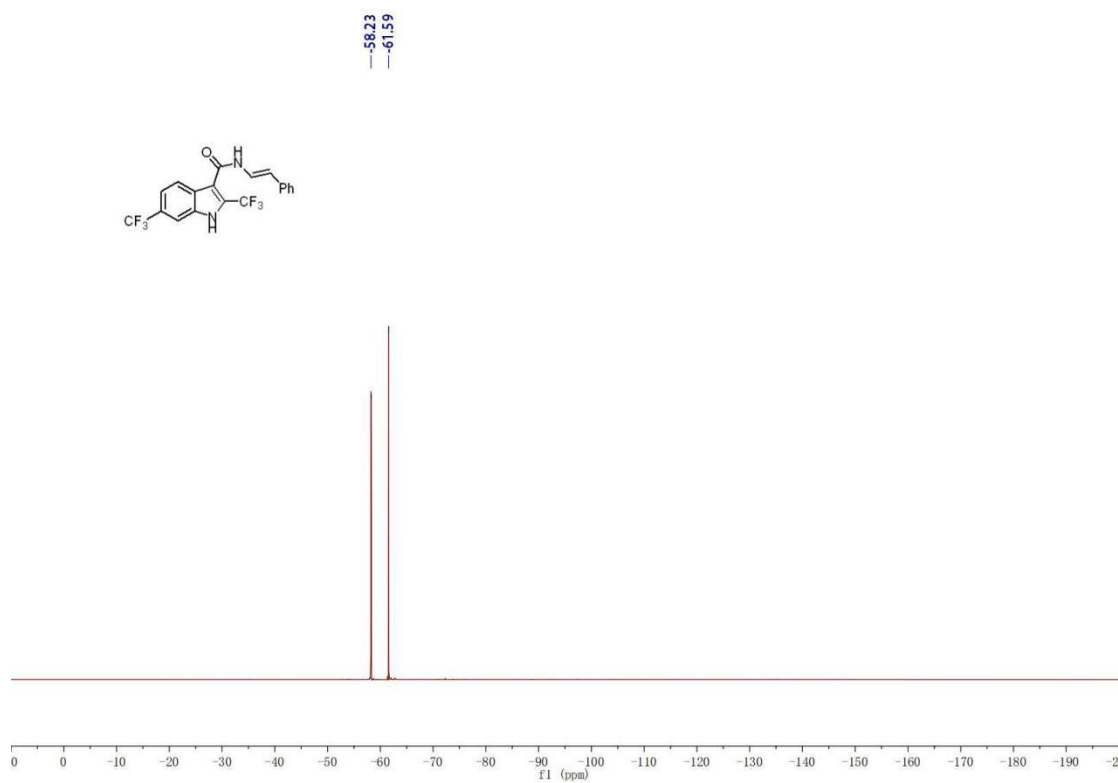

### <sup>1</sup>H NMR (400 MHz, Acetone-*d*<sub>6</sub>) spectrum of 3ka'

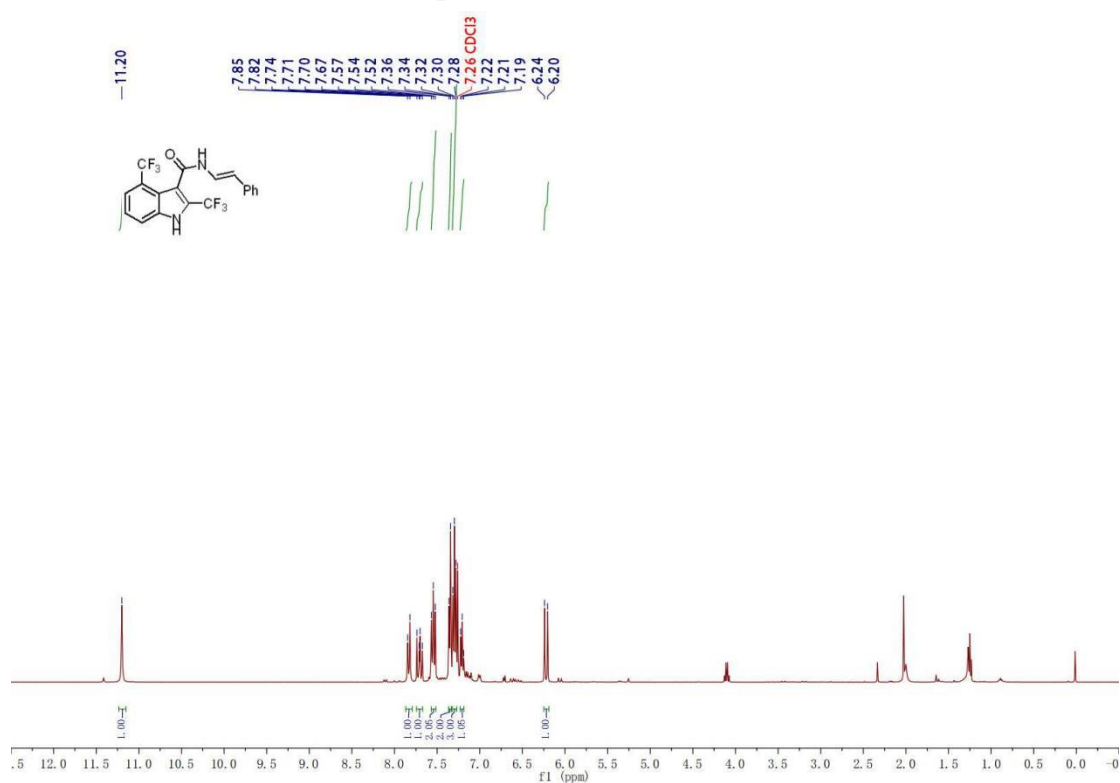

### <sup>13</sup>C NMR (100 MHz, Acetone-*d*<sub>6</sub>) spectrum of 3ka'

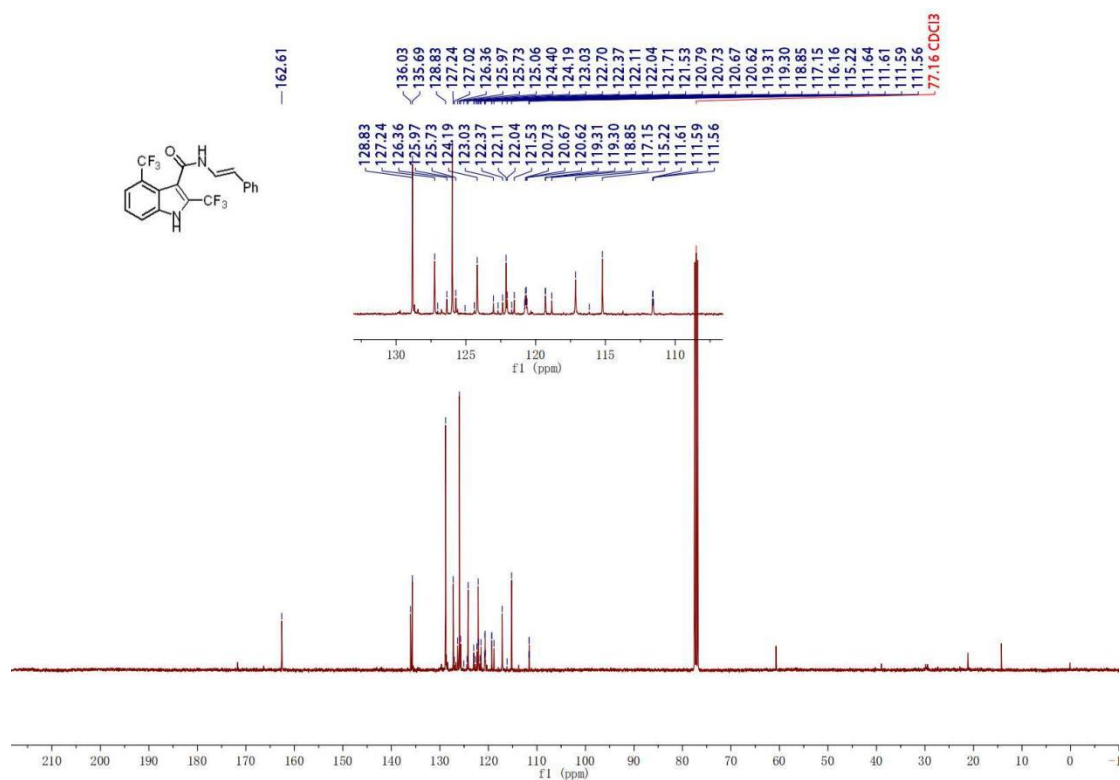



**<sup>19</sup>F NMR (376 MHz, Acetone-*d*<sub>6</sub>) spectrum of 3ka'**

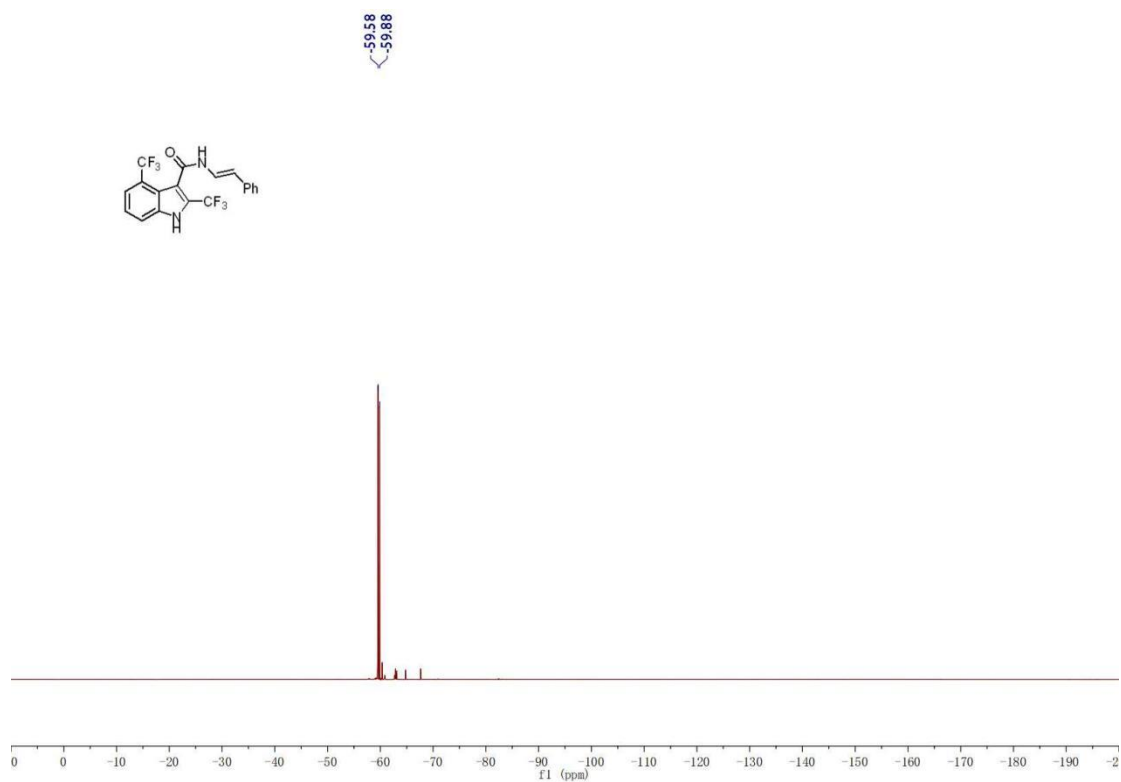

**<sup>1</sup>H NMR (400 MHz, CDCl<sub>3</sub>) spectrum of 3la**

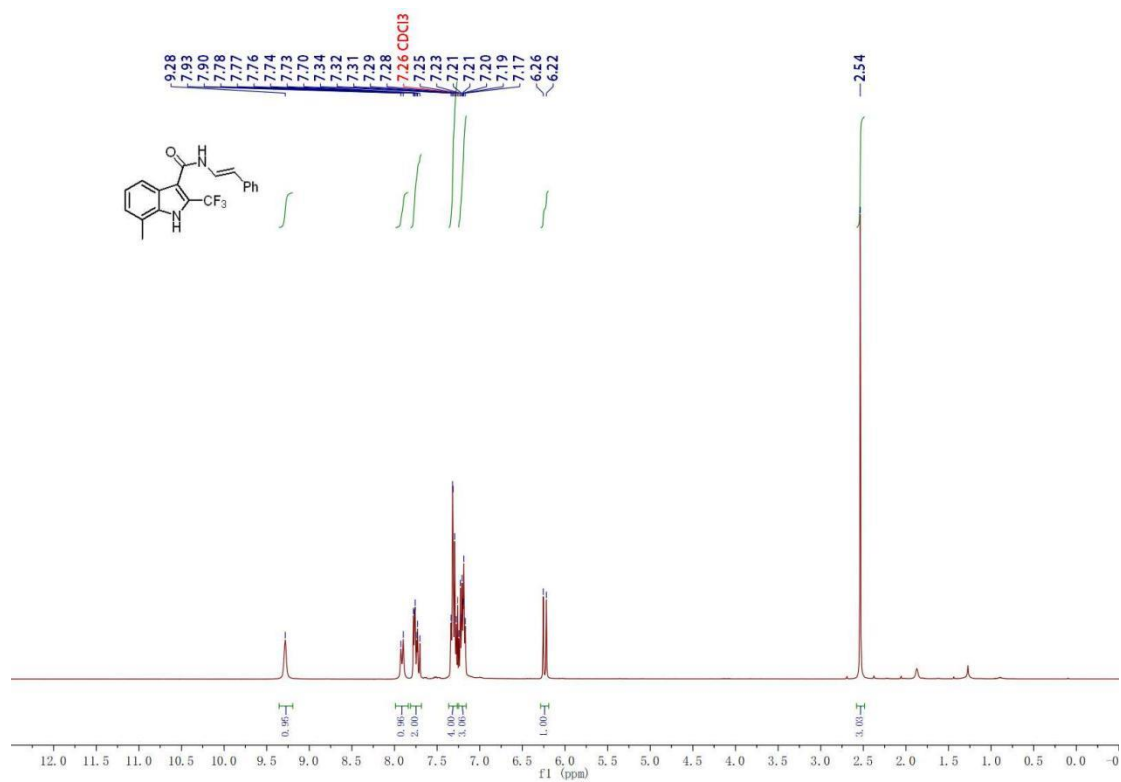

**<sup>13</sup>C NMR (100 MHz, CDCl<sub>3</sub>) spectrum of 3la**

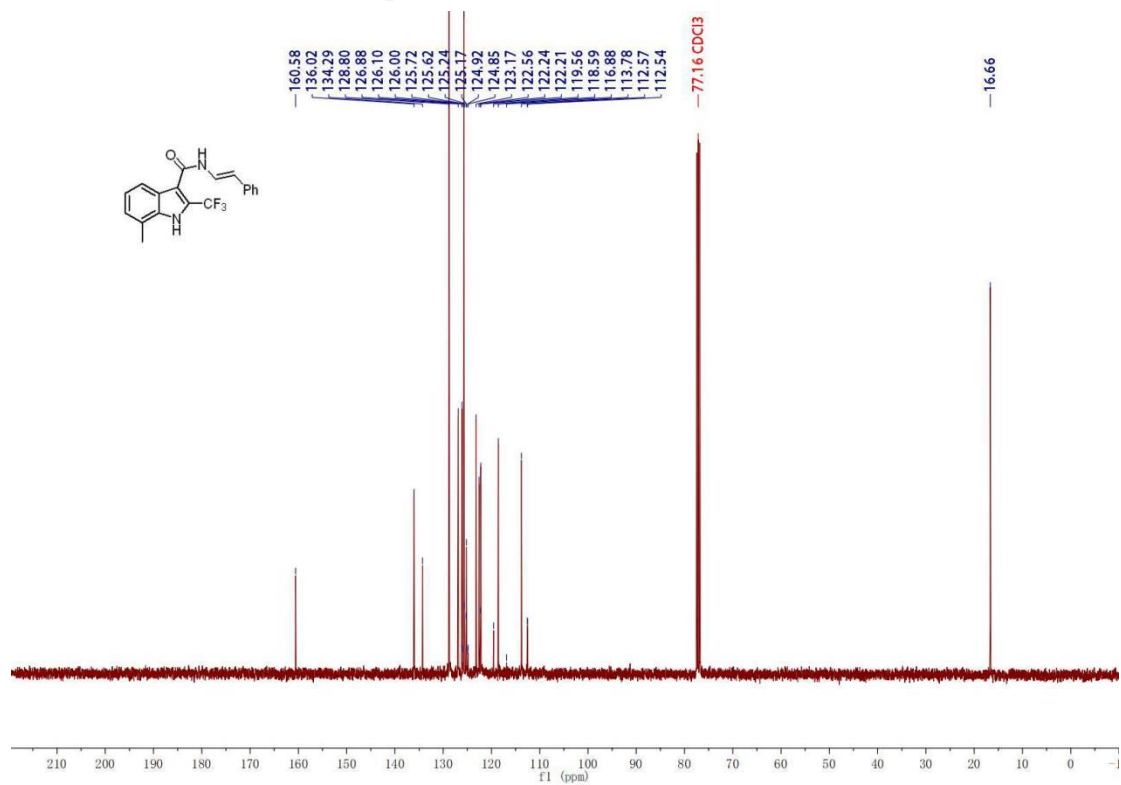

**<sup>19</sup>F NMR (376 MHz, CDCl<sub>3</sub>) spectrum of 3la**

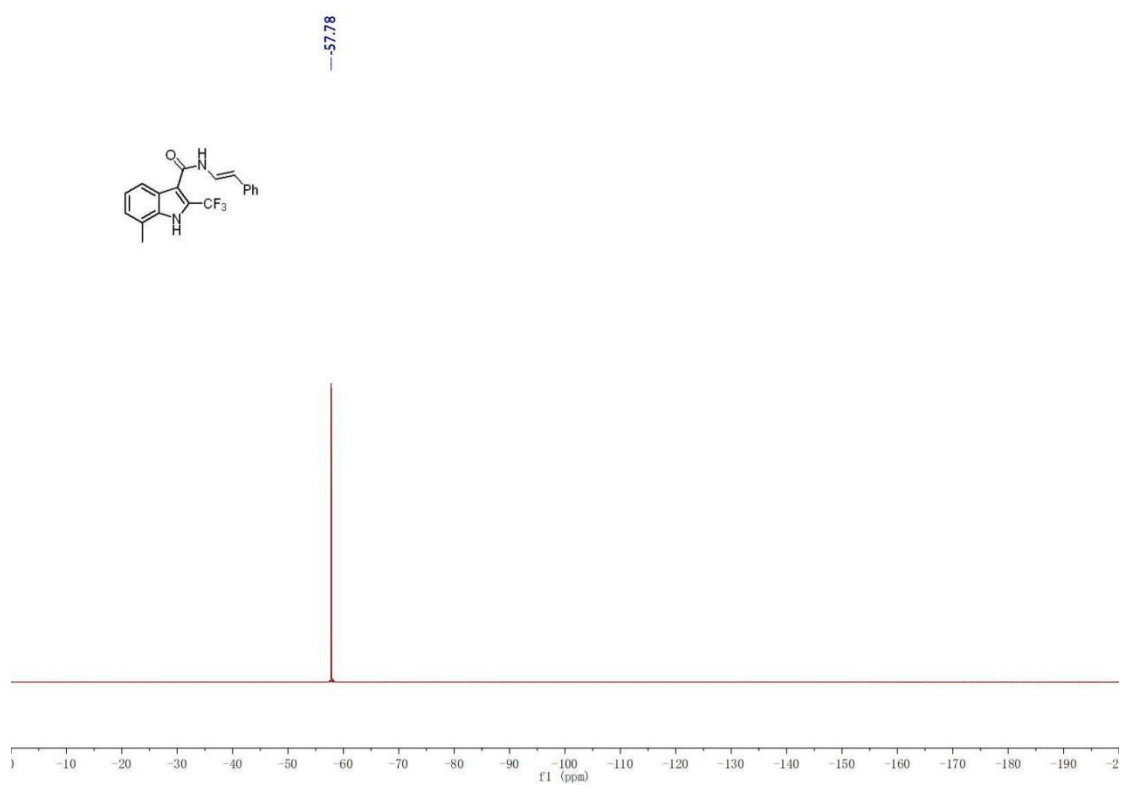

### <sup>1</sup>H NMR (400 MHz, Acetone-d<sub>6</sub>) spectrum of 3ma

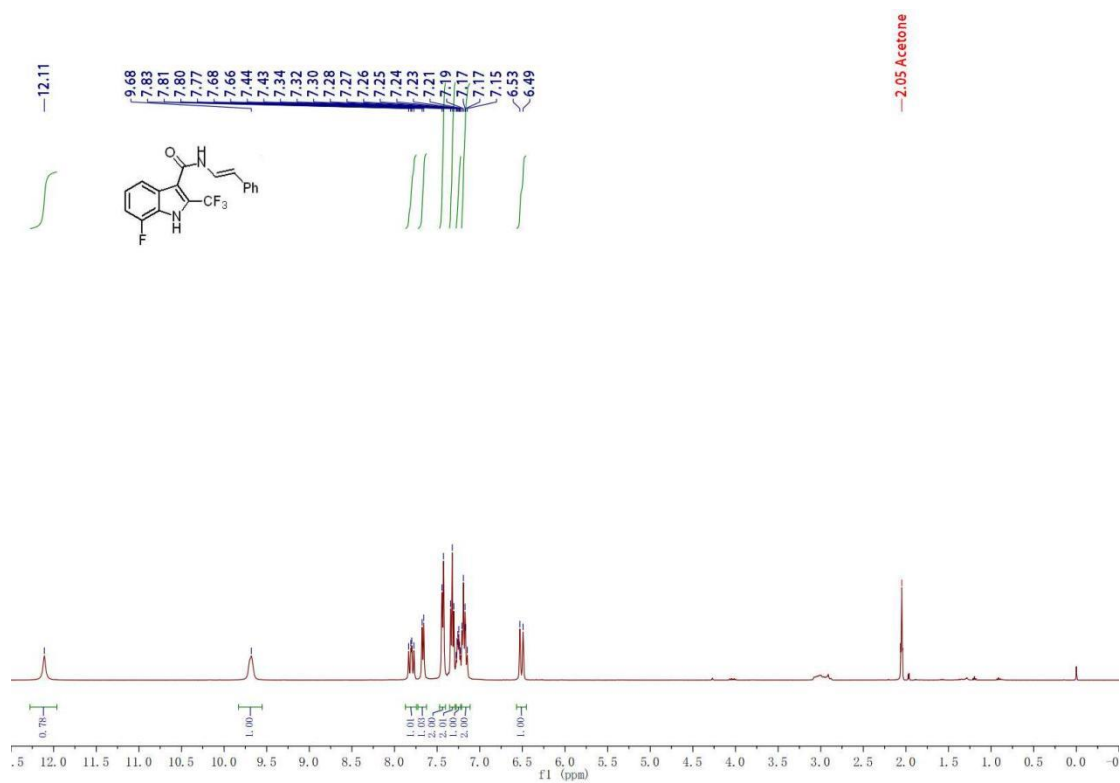

### <sup>13</sup>C NMR (100 MHz, Acetone-d<sub>6</sub>) spectrum of 3ma

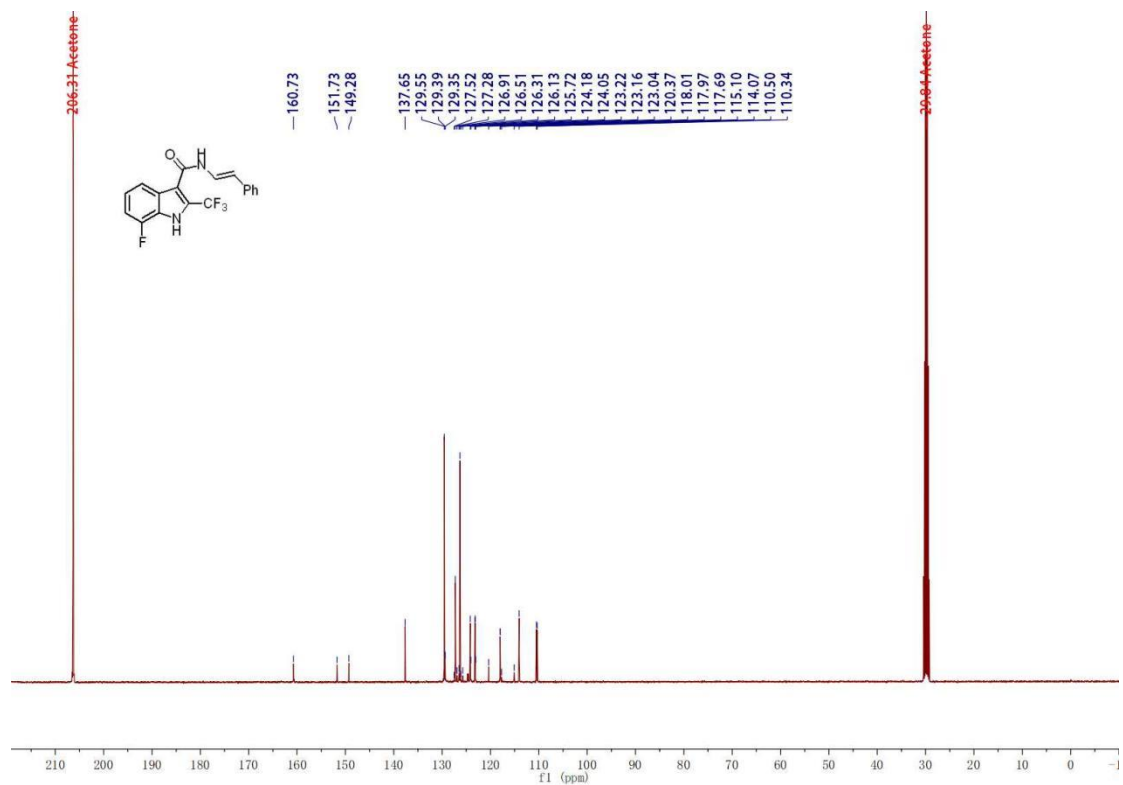

**<sup>19</sup>F NMR (376 MHz, Acetone-*d*<sub>6</sub>) spectrum of 3ma**

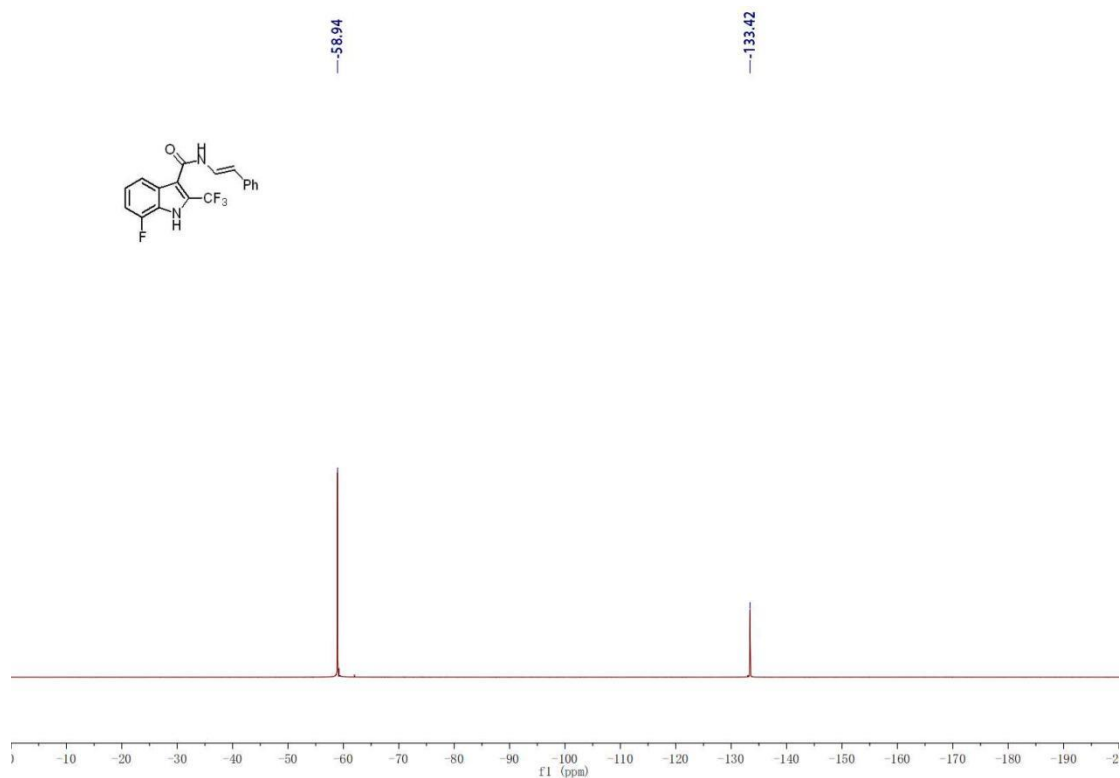

**<sup>1</sup>H NMR (400 MHz, Acetone-*d*<sub>6</sub>) spectrum of 3na**

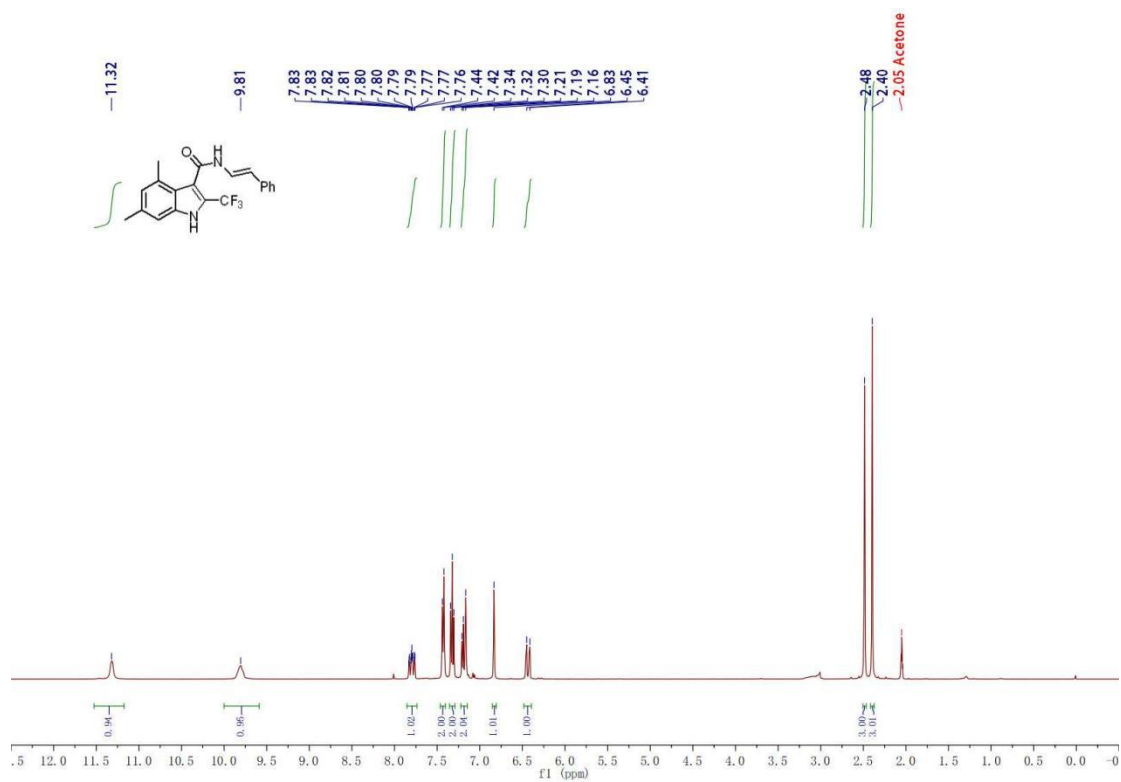

**<sup>13</sup>C NMR (100 MHz, Acetone-*d*<sub>6</sub>) spectrum of 3na**

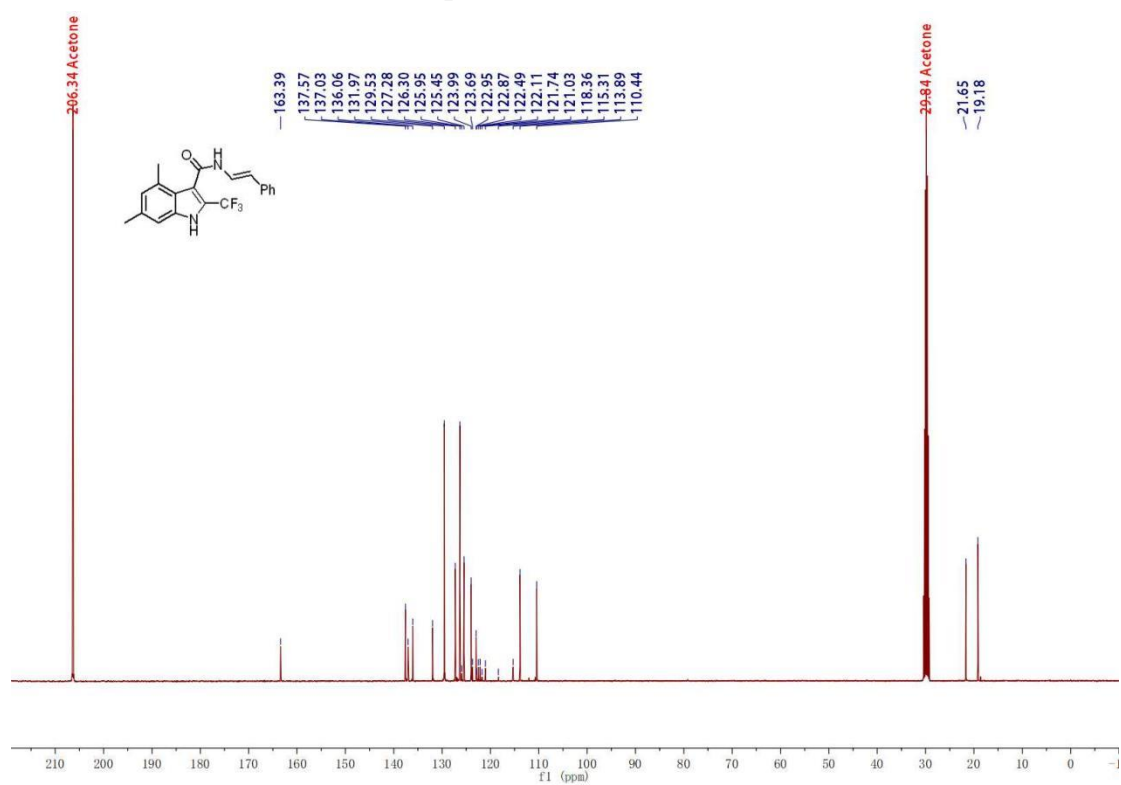

**<sup>19</sup>F NMR (376 MHz, Acetone-*d*<sub>6</sub>) spectrum of 3na**

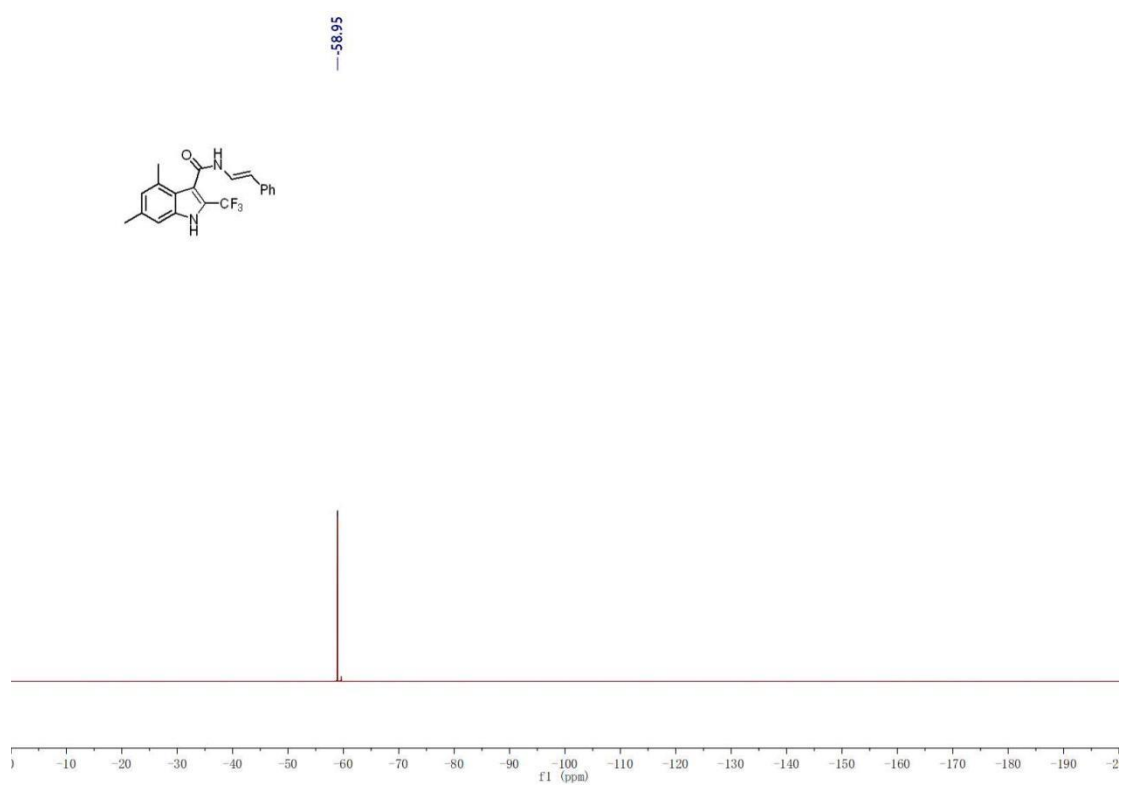

### <sup>1</sup>H NMR (400 MHz, Acetone-*d*<sub>6</sub>) spectrum of 3oa

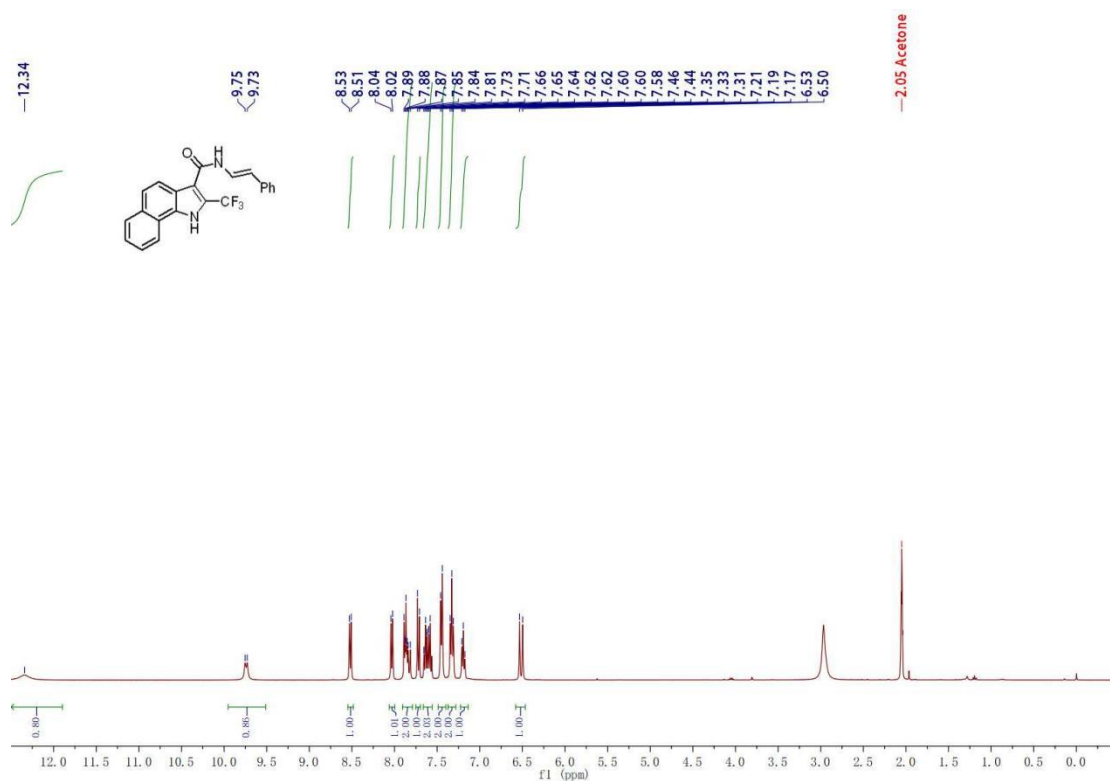

### <sup>13</sup>C NMR (100 MHz, Acetone-*d*<sub>6</sub>) spectrum of 3oa

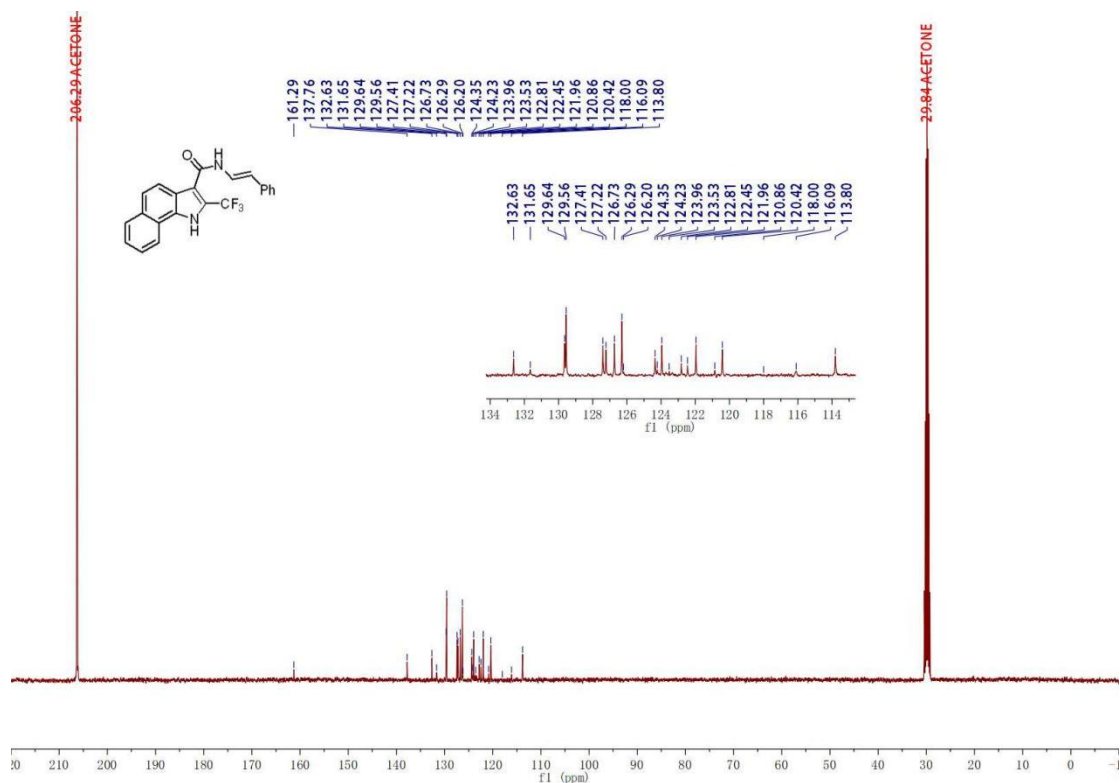

**<sup>19</sup>F NMR (376 MHz, Acetone-*d*<sub>6</sub>) spectrum of 30a**

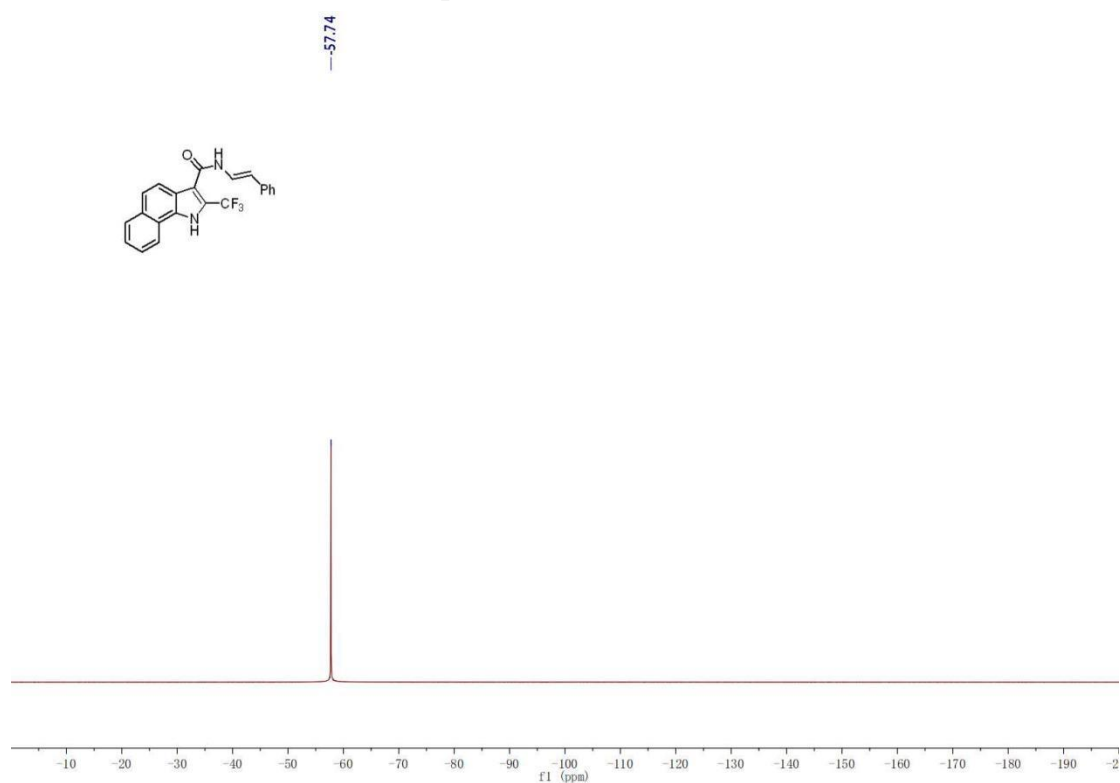

**<sup>1</sup>H NMR (400 MHz, CDCl<sub>3</sub>) spectrum of 3pa**

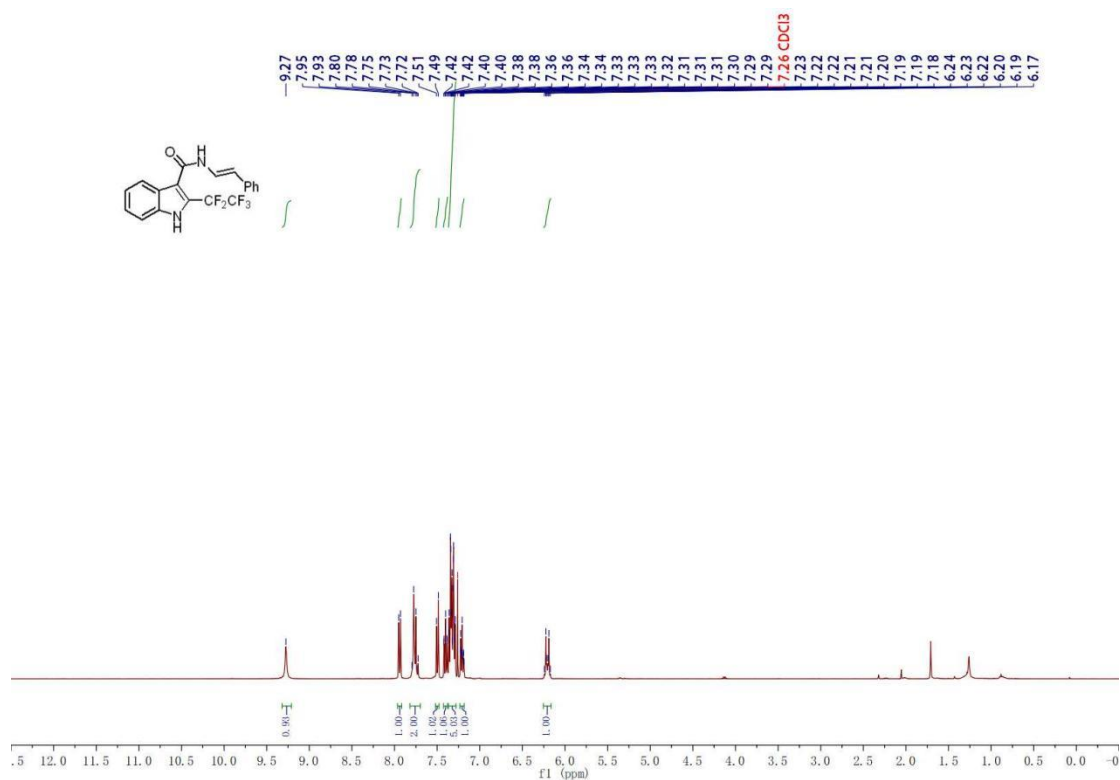

**<sup>13</sup>C NMR (150 MHz, CDCl<sub>3</sub>) spectrum of 3pa**

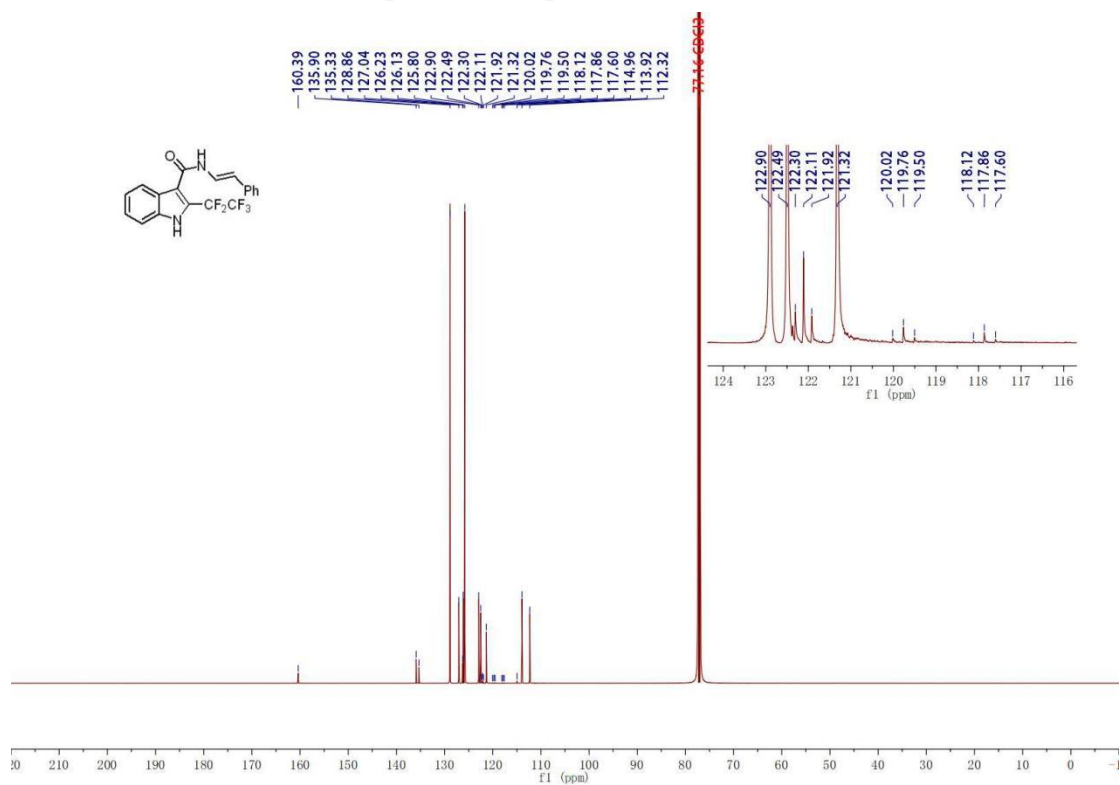

**<sup>19</sup>F NMR (376 MHz, CDCl<sub>3</sub>) spectrum of 3pa**

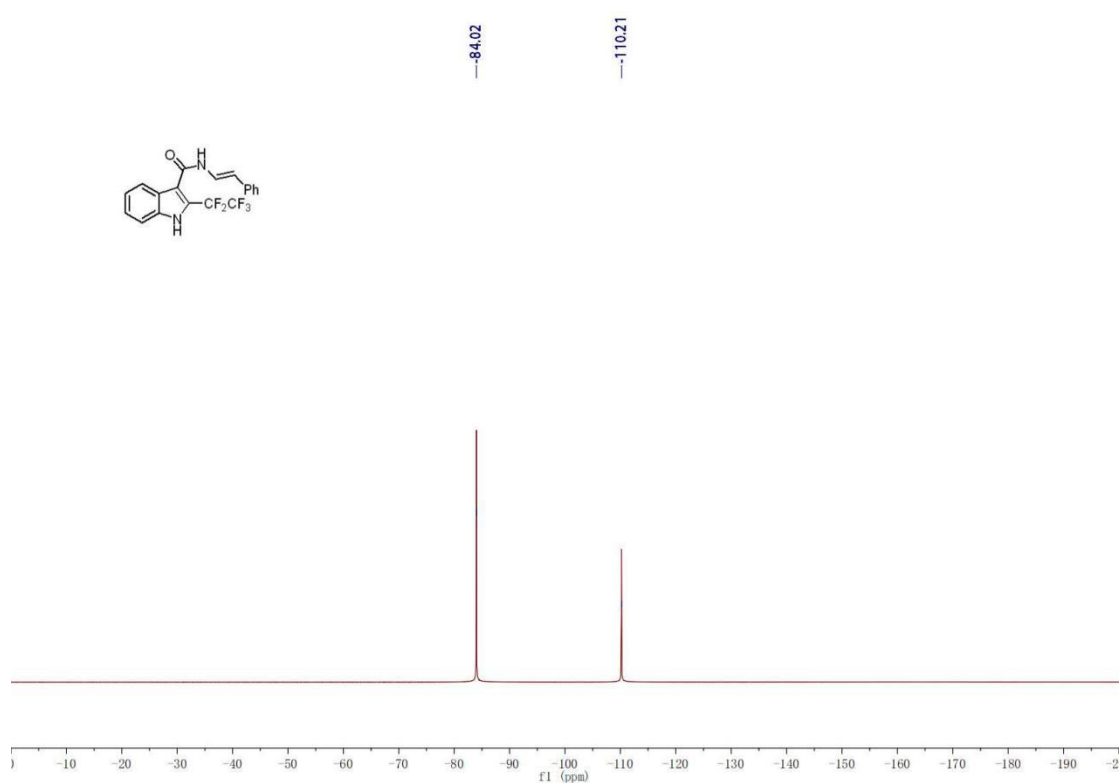



**<sup>1</sup>H NMR (400 MHz, CDCl<sub>3</sub>) spectrum of 3ra**

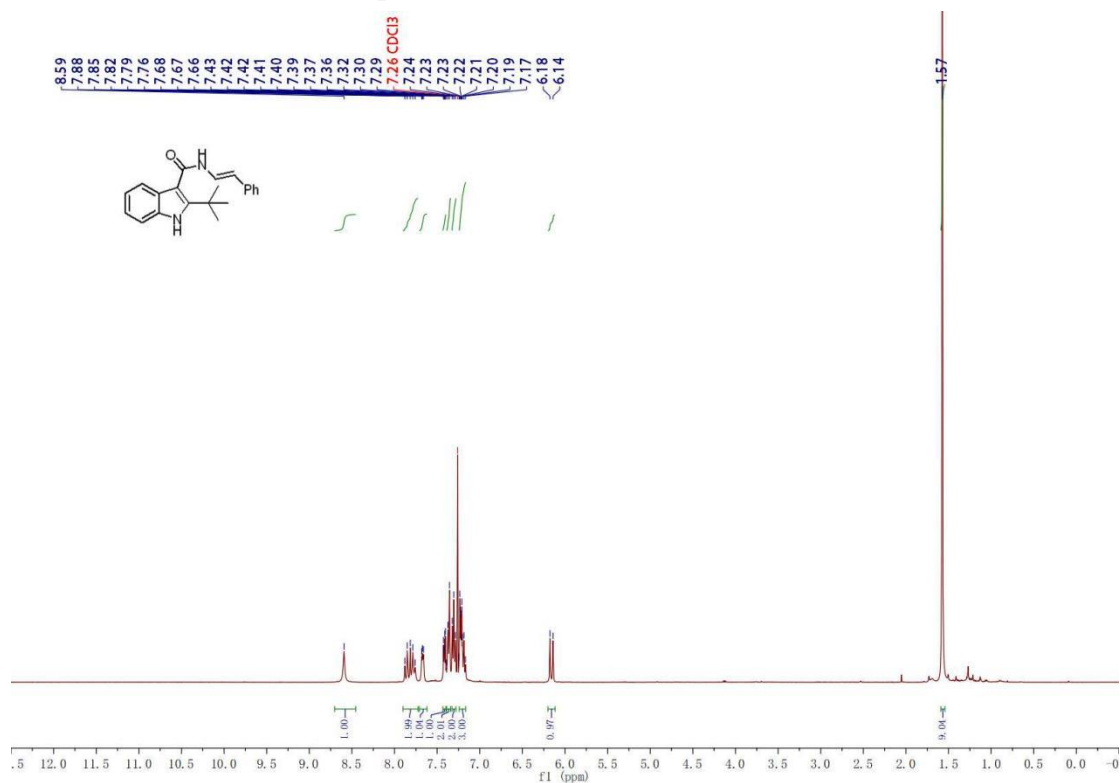

**<sup>13</sup>C NMR (150 MHz, CDCl<sub>3</sub>) spectrum of 3ra**

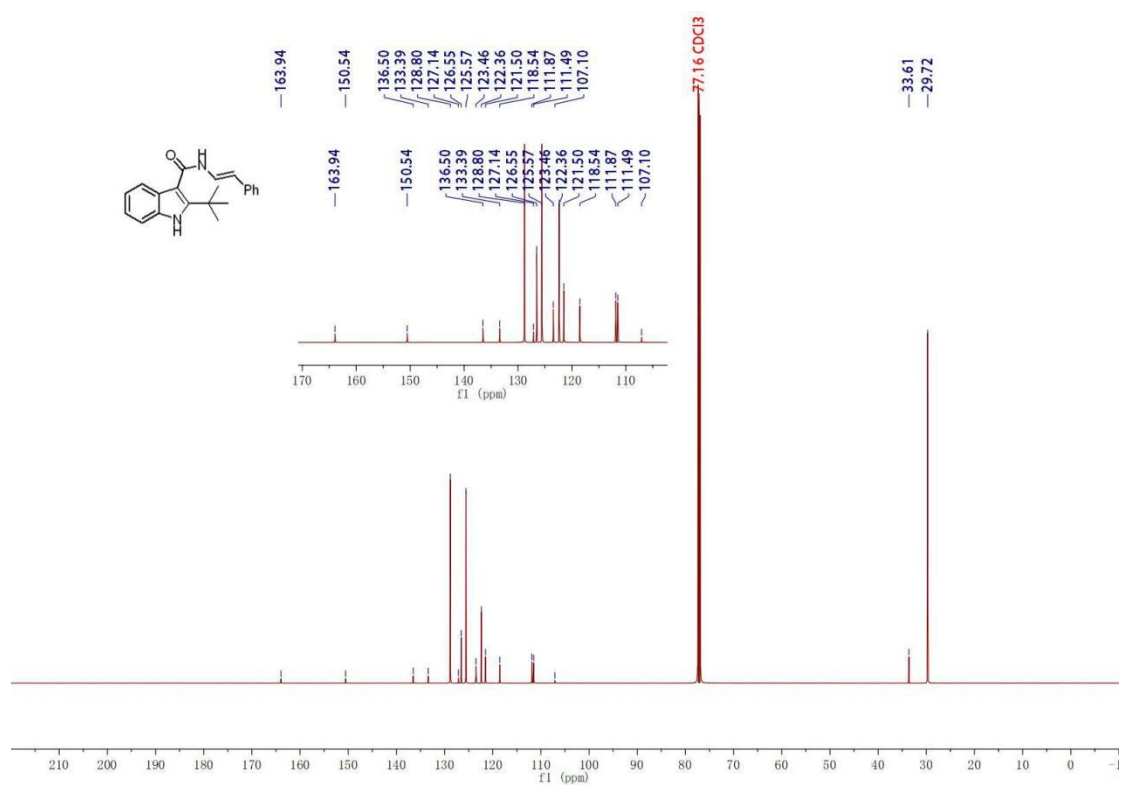

**<sup>1</sup>H NMR (400 MHz, CDCl<sub>3</sub>) spectrum of 3ra'**

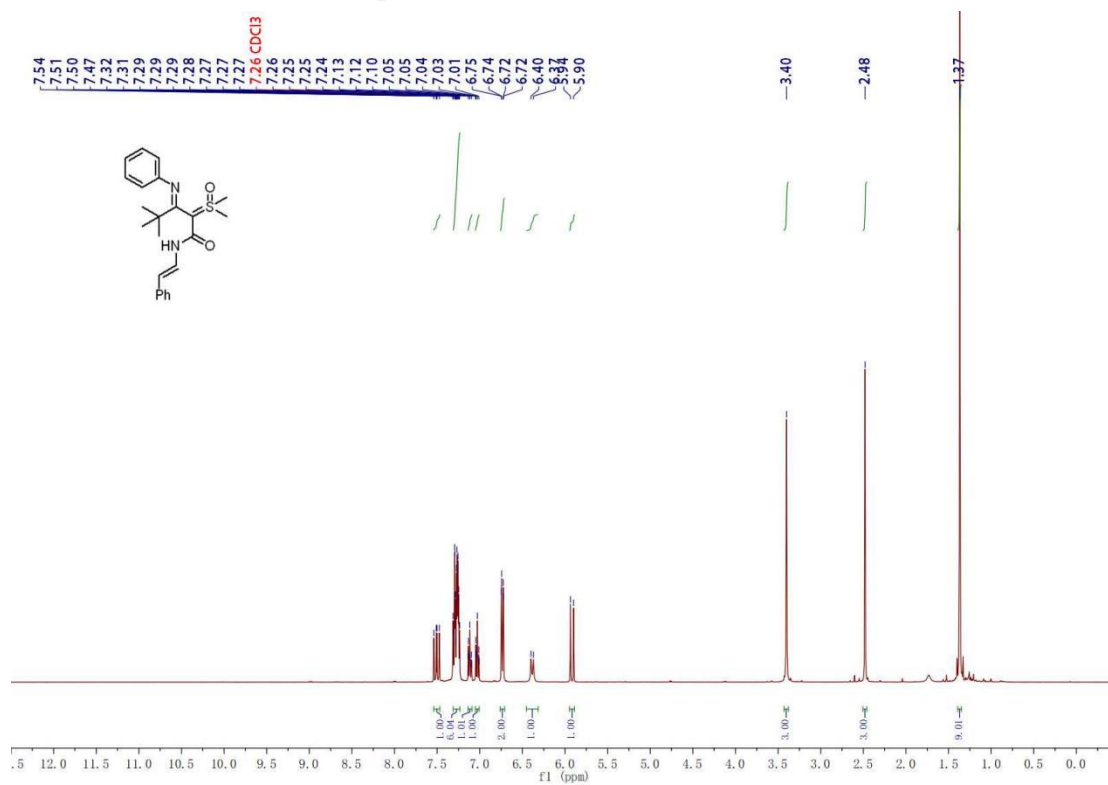

**<sup>13</sup>C NMR (150 MHz, CDCl<sub>3</sub>) spectrum of 3ra'**

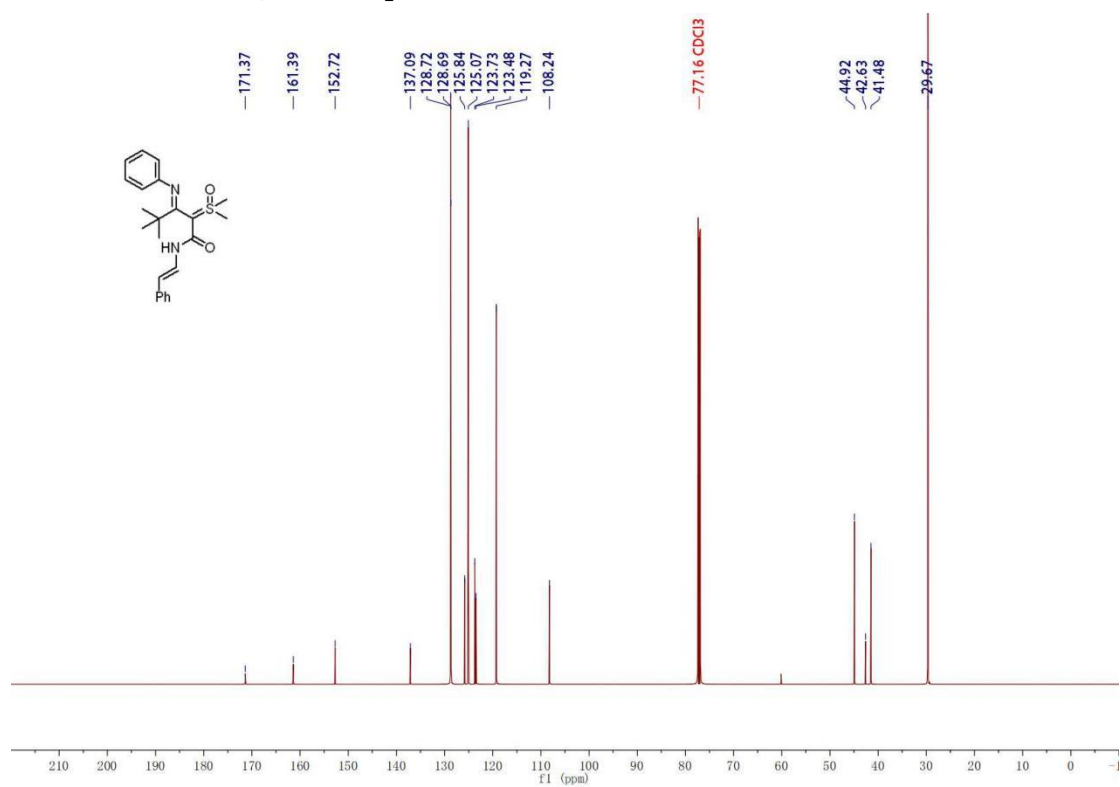

### <sup>1</sup>H NMR (400 MHz, Acetone-d<sub>6</sub>) spectrum of 3ab

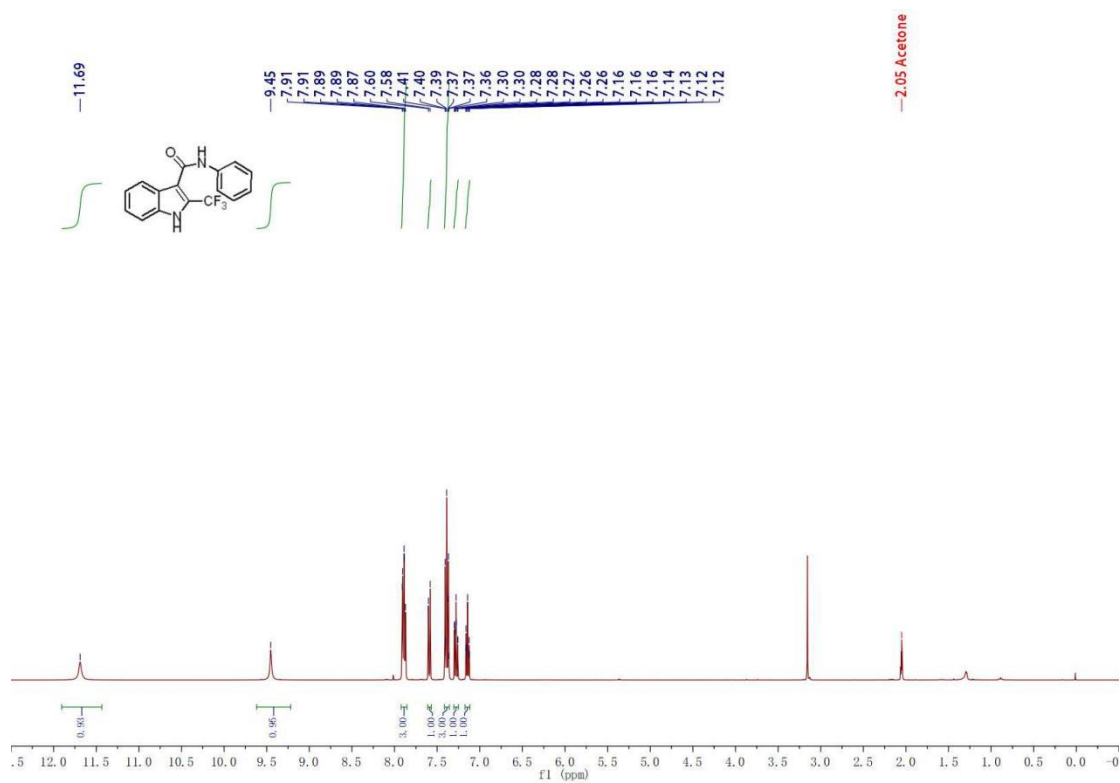

### <sup>13</sup>C NMR (100 MHz, Acetone-d<sub>6</sub>) spectrum of 3ab

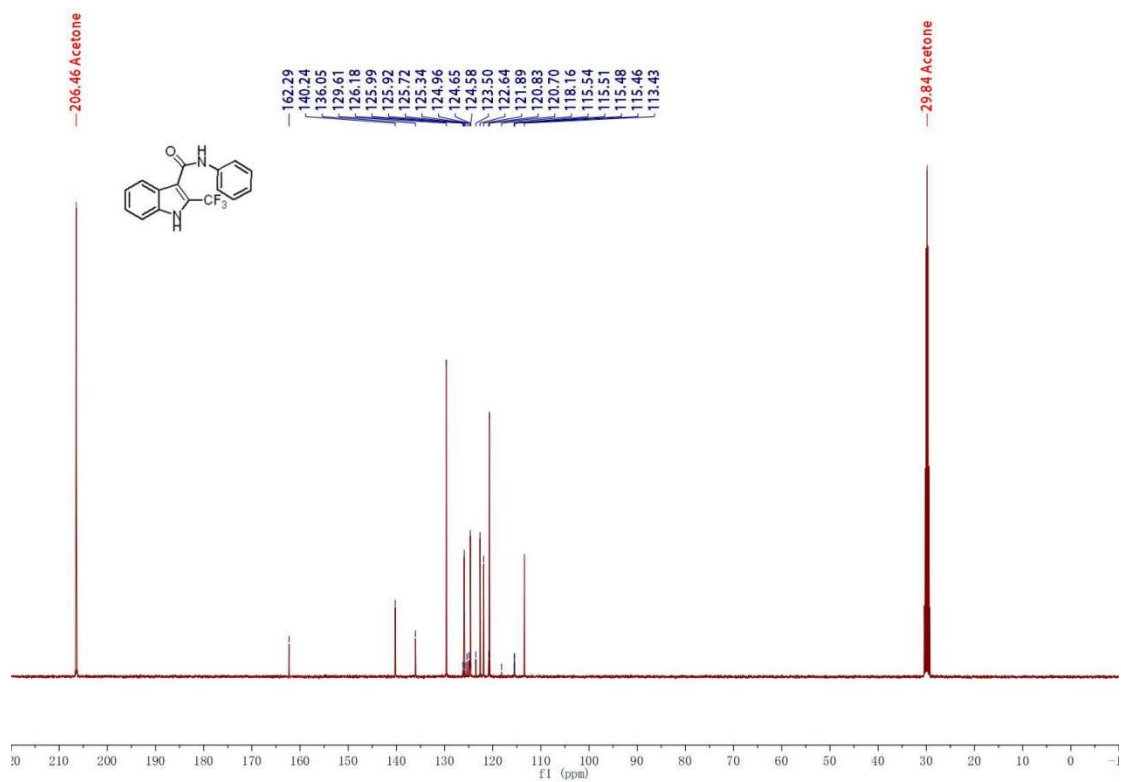

**<sup>19</sup>F NMR (376 MHz, Acetone-*d*<sub>6</sub>) spectrum of 3ab**

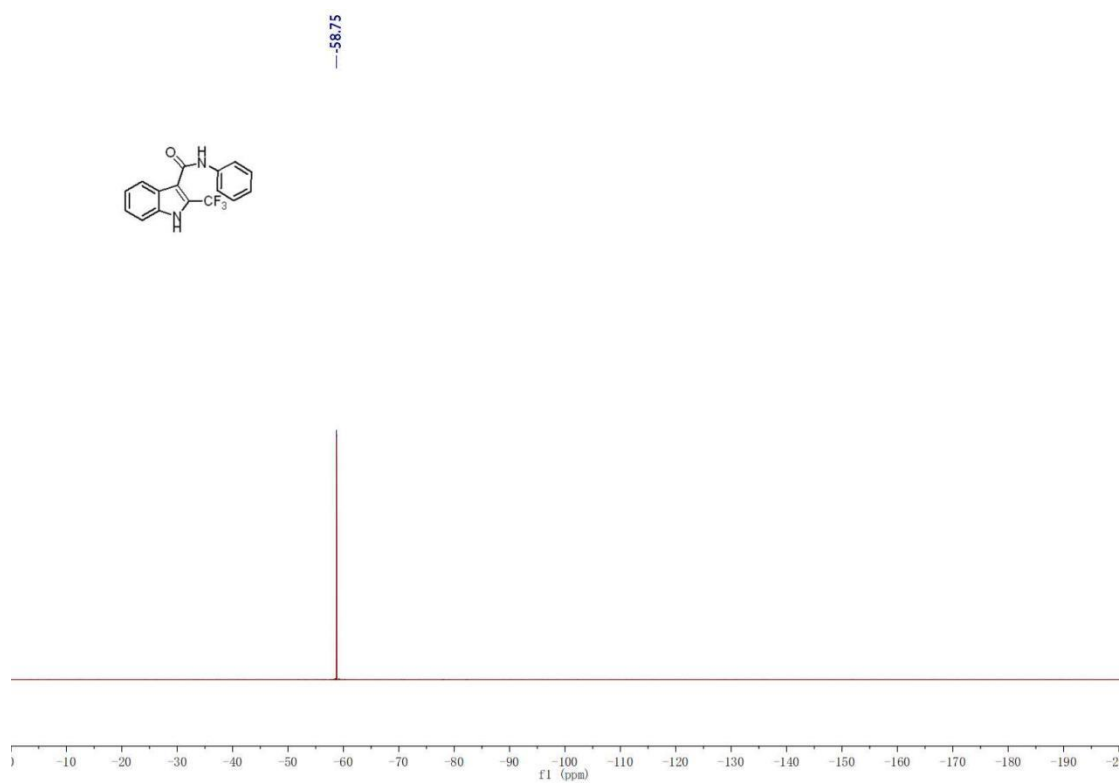

**<sup>1</sup>H NMR (400 MHz, CDCl<sub>3</sub>) spectrum of 3ac**

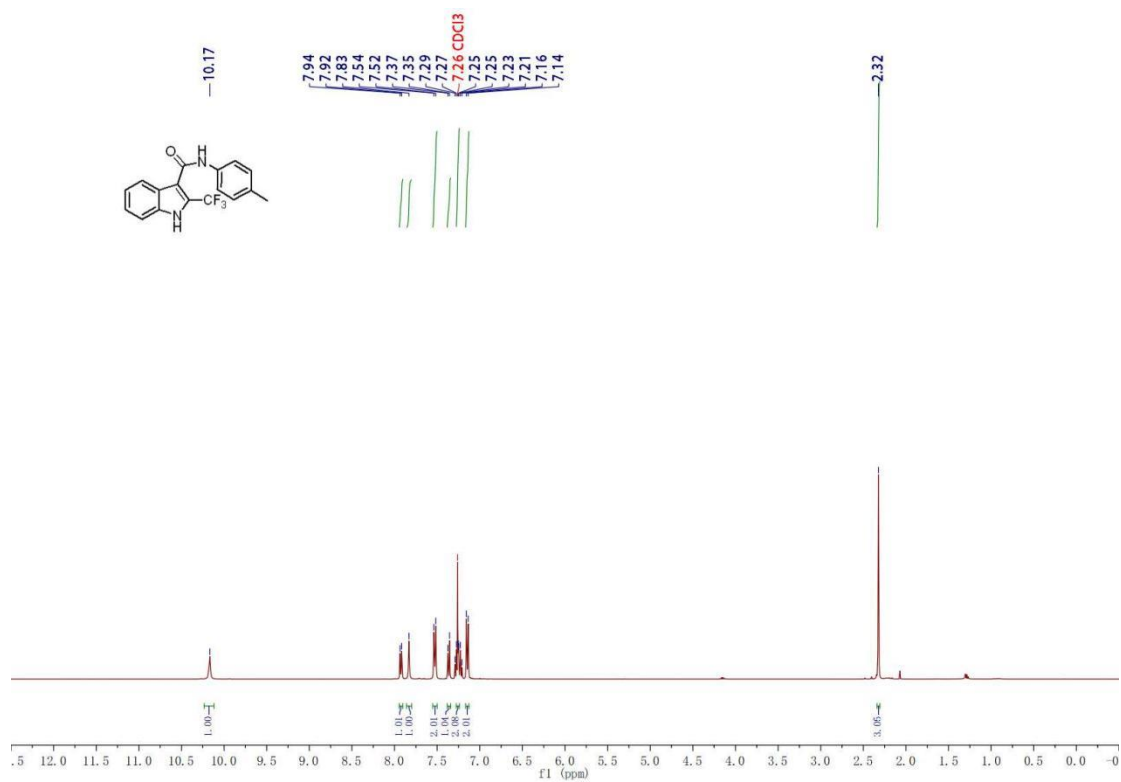

**<sup>13</sup>C NMR (100 MHz, CDCl<sub>3</sub>) spectrum of 3ac**

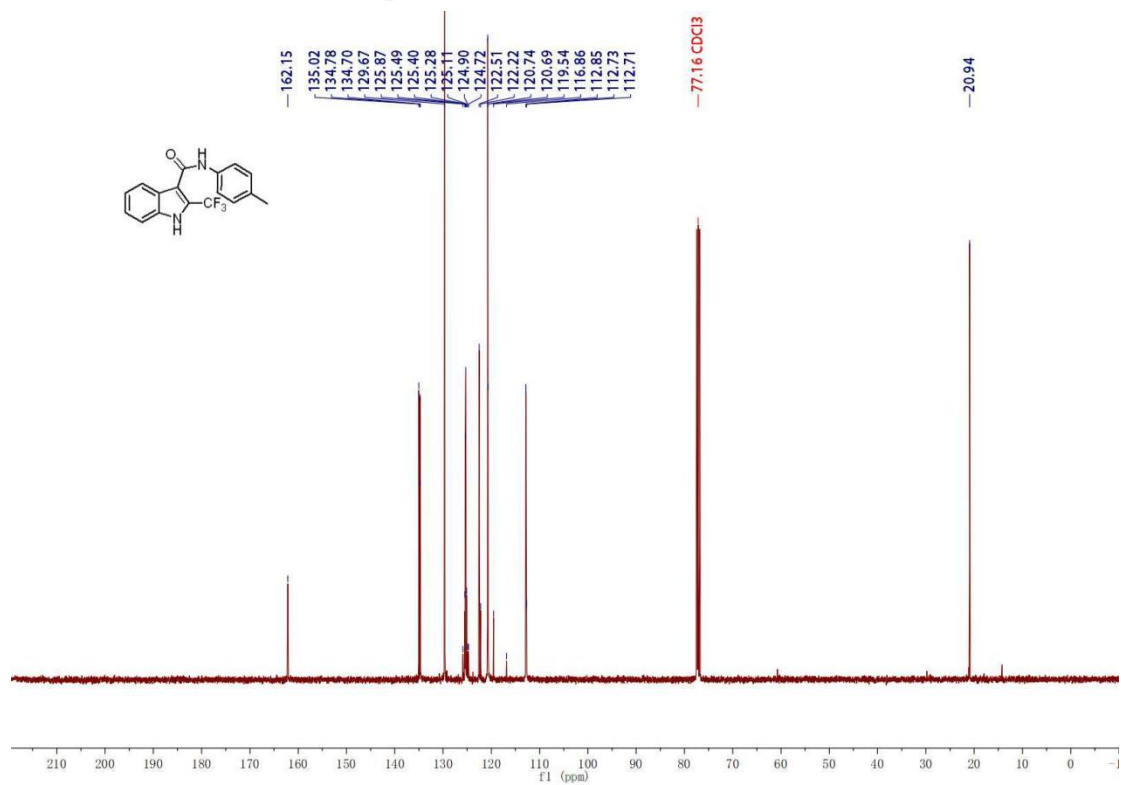

**<sup>19</sup>F NMR (376 MHz, CDCl<sub>3</sub>) spectrum of 3ac**

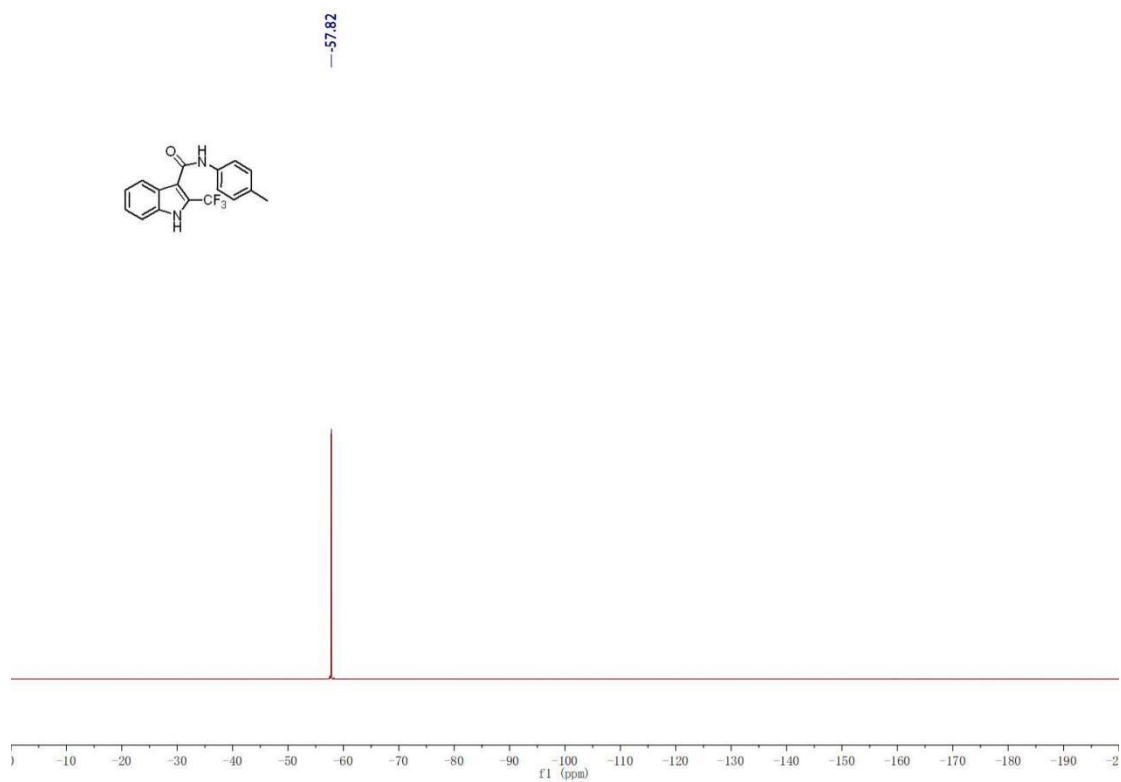

**<sup>1</sup>H NMR (400 MHz, CDCl<sub>3</sub>) spectrum of 3ad**

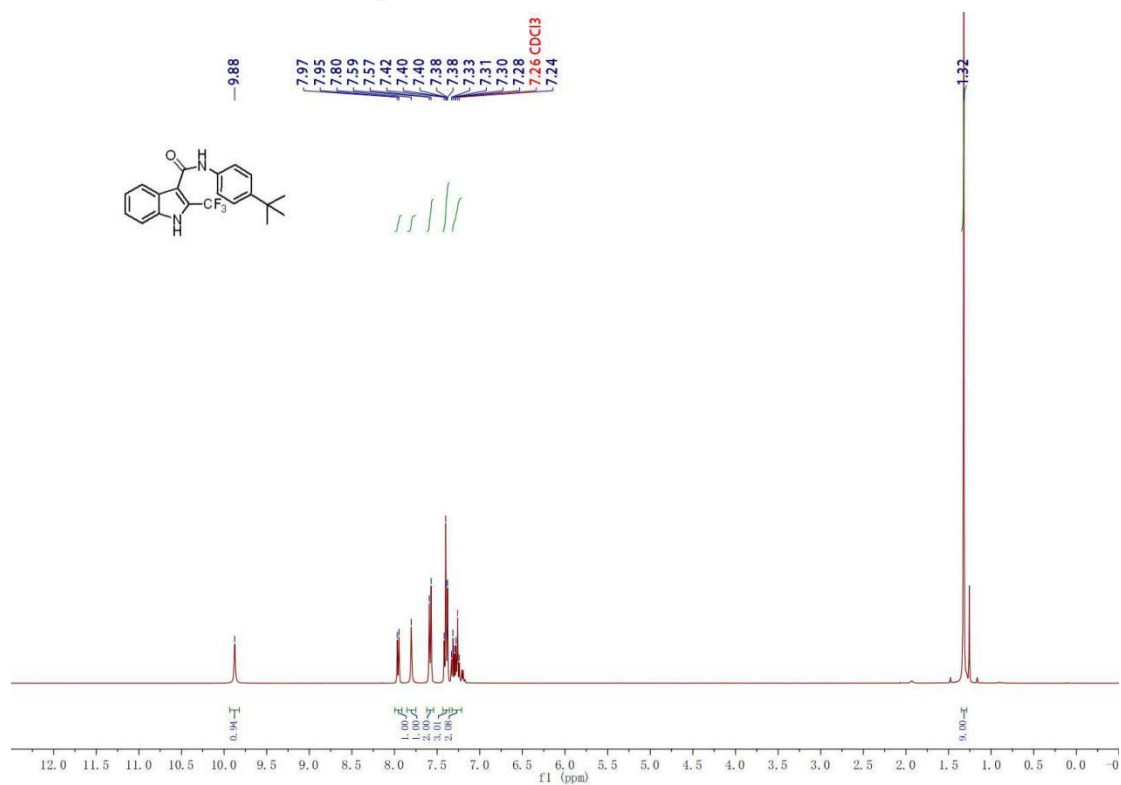

**<sup>13</sup>C NMR (100 MHz, CDCl<sub>3</sub>) spectrum of 3ad**

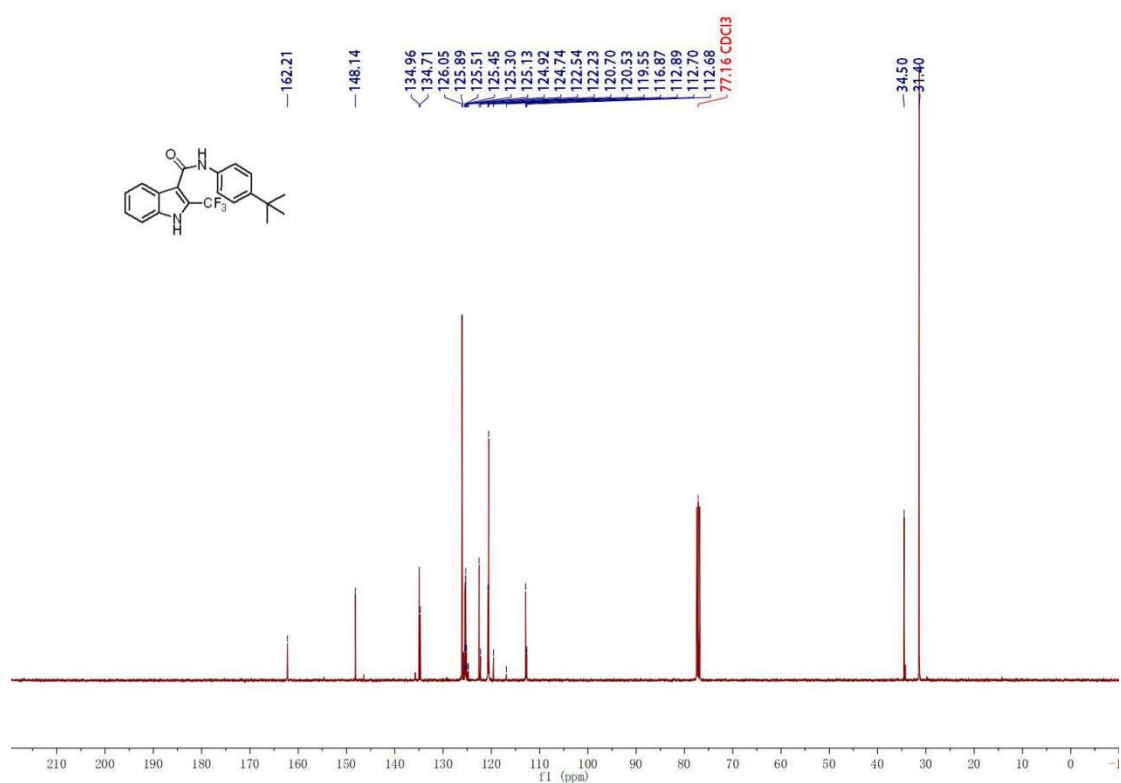

**$^{19}\text{F}$  NMR (376 MHz,  $\text{CDCl}_3$ ) spectrum of 3ad**

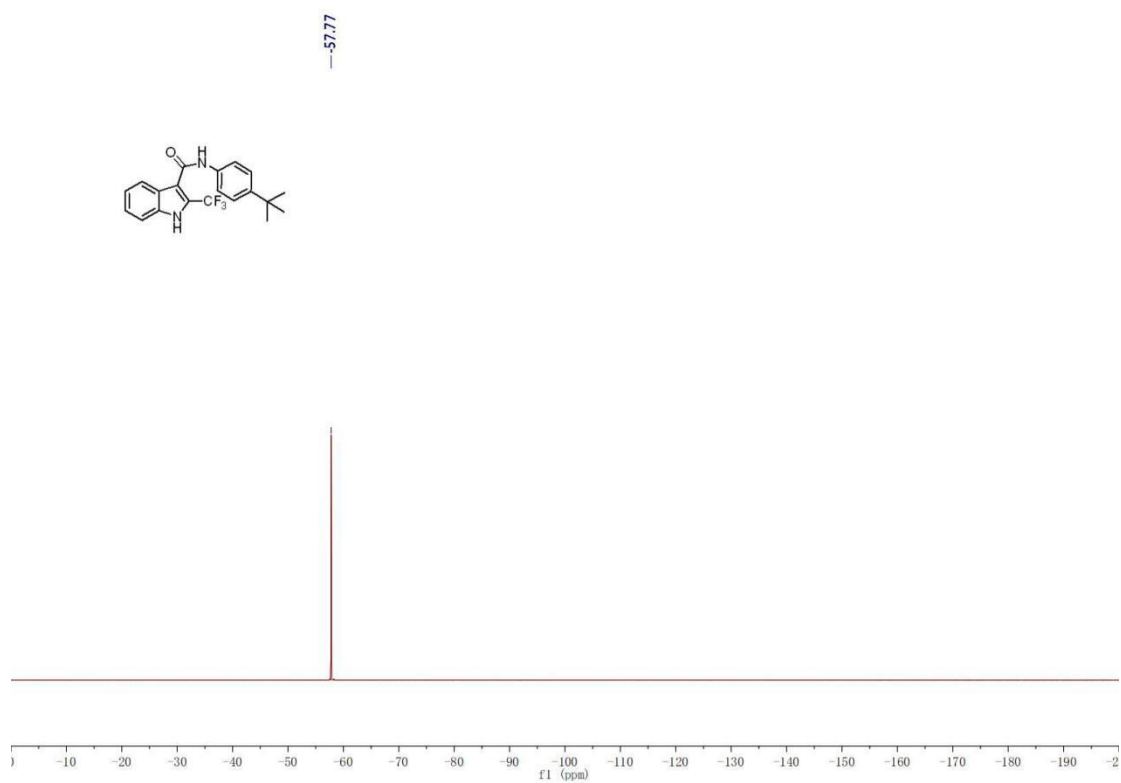

**$^1\text{H}$  NMR (400 MHz, Acetone- $d_6$ ) spectrum of 3ae**

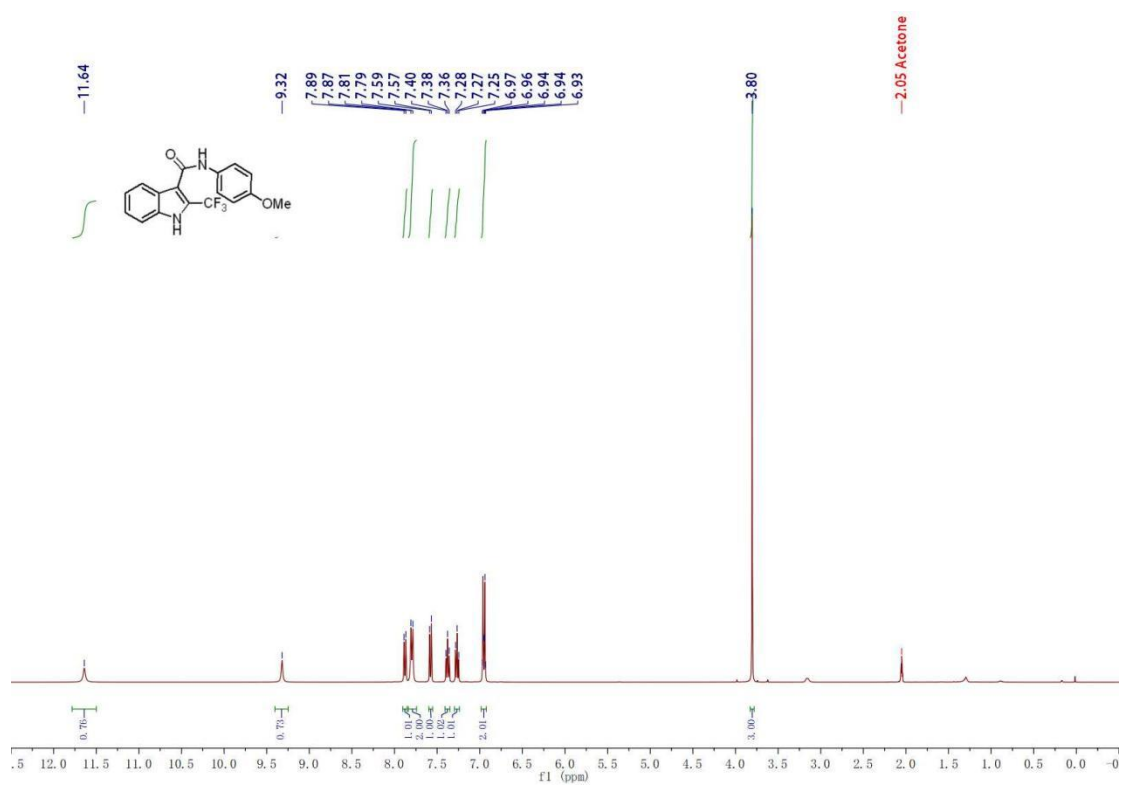

**<sup>13</sup>C NMR (150 MHz, Acetone-*d*<sub>6</sub>) spectrum of 3ae**

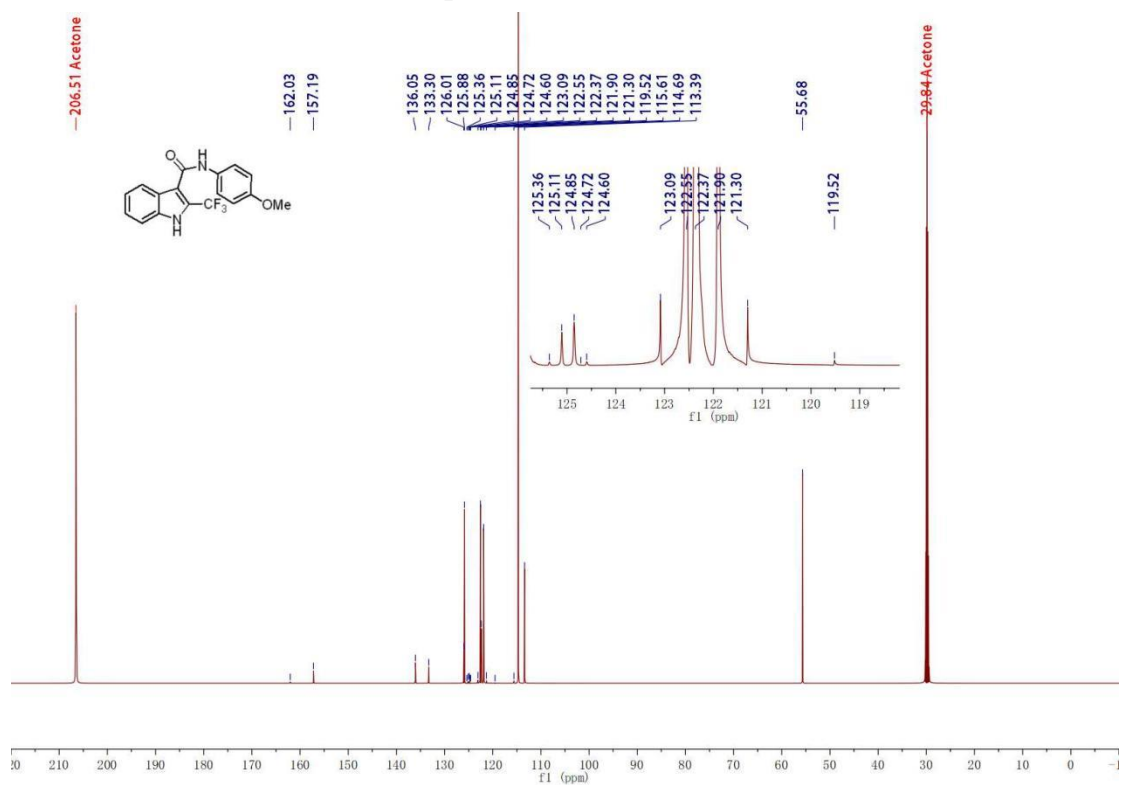

**<sup>19</sup>F NMR (376 MHz, Acetone-*d*<sub>6</sub>) spectrum of 3ae**

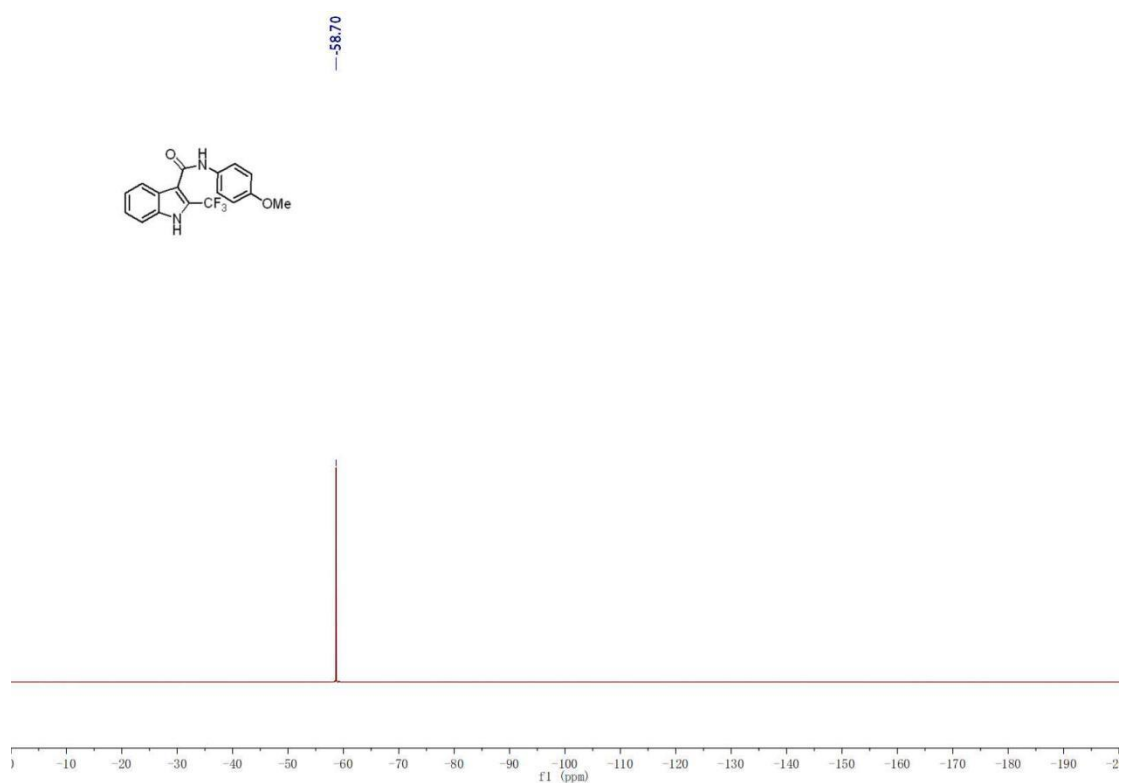



### <sup>1</sup>H NMR (400 MHz, Acetone-*d*<sub>6</sub>) spectrum of 3af

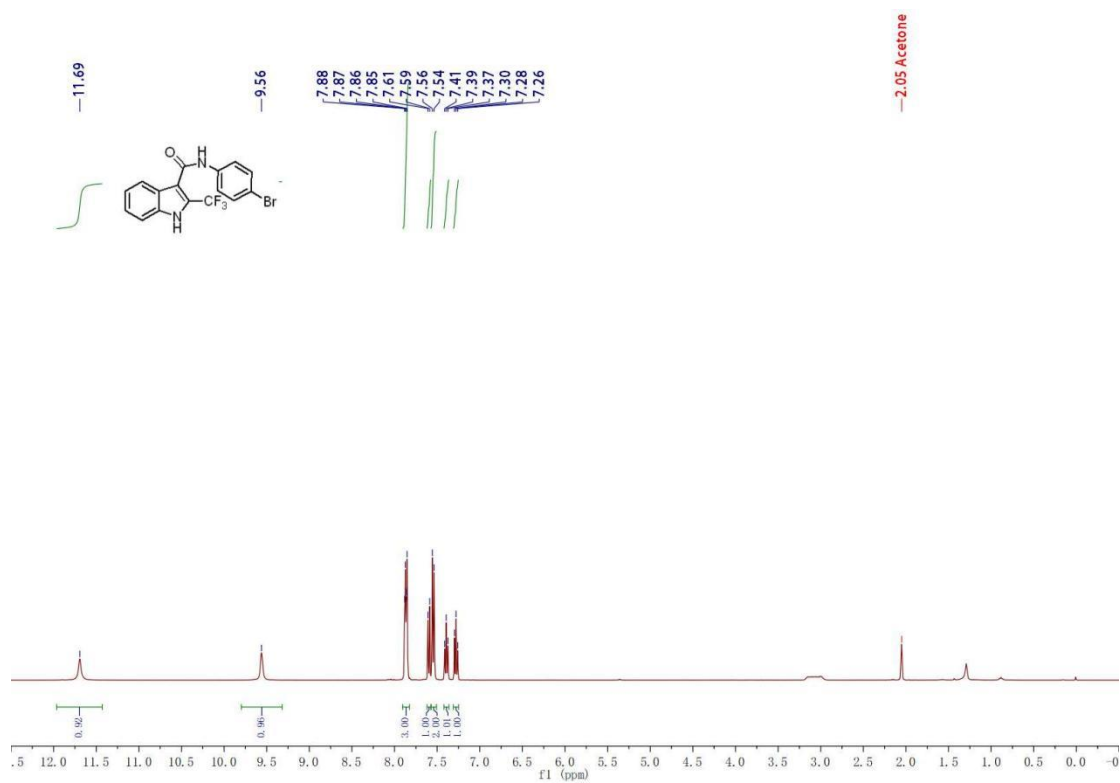

### <sup>13</sup>C NMR (100 MHz, Acetone-*d*<sub>6</sub>) spectrum of 3af

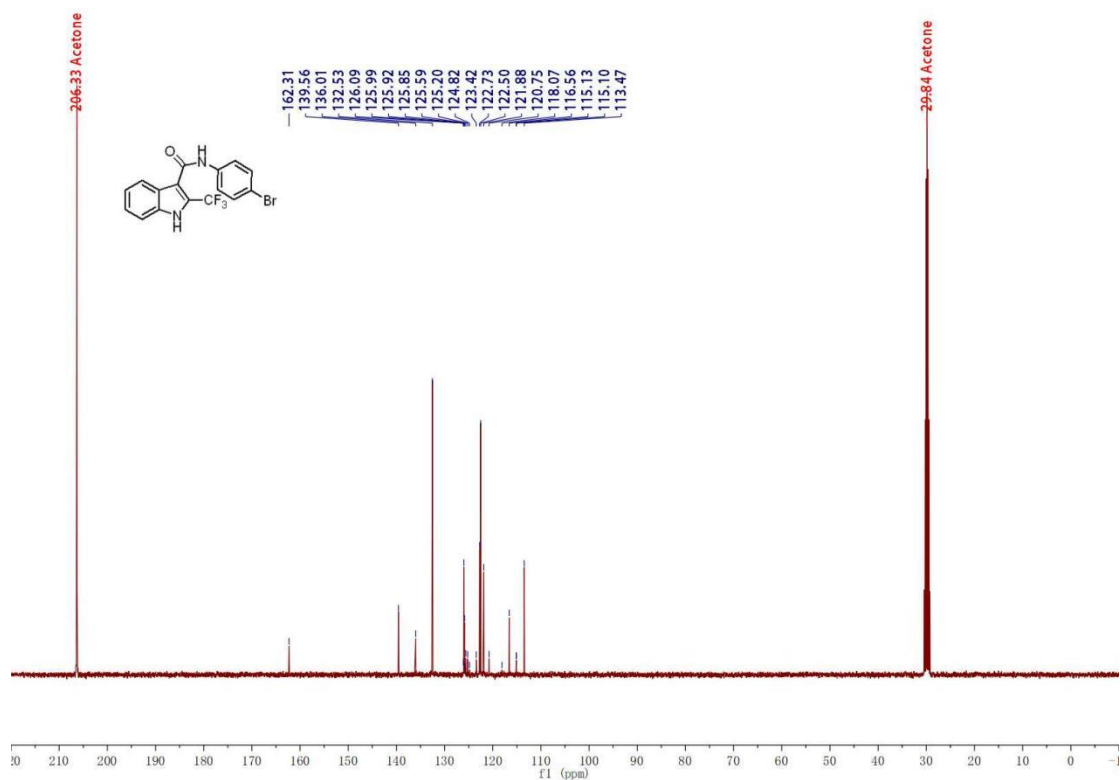

**<sup>19</sup>F NMR (376 MHz, Acetone-*d*<sub>6</sub>) spectrum of 3af**

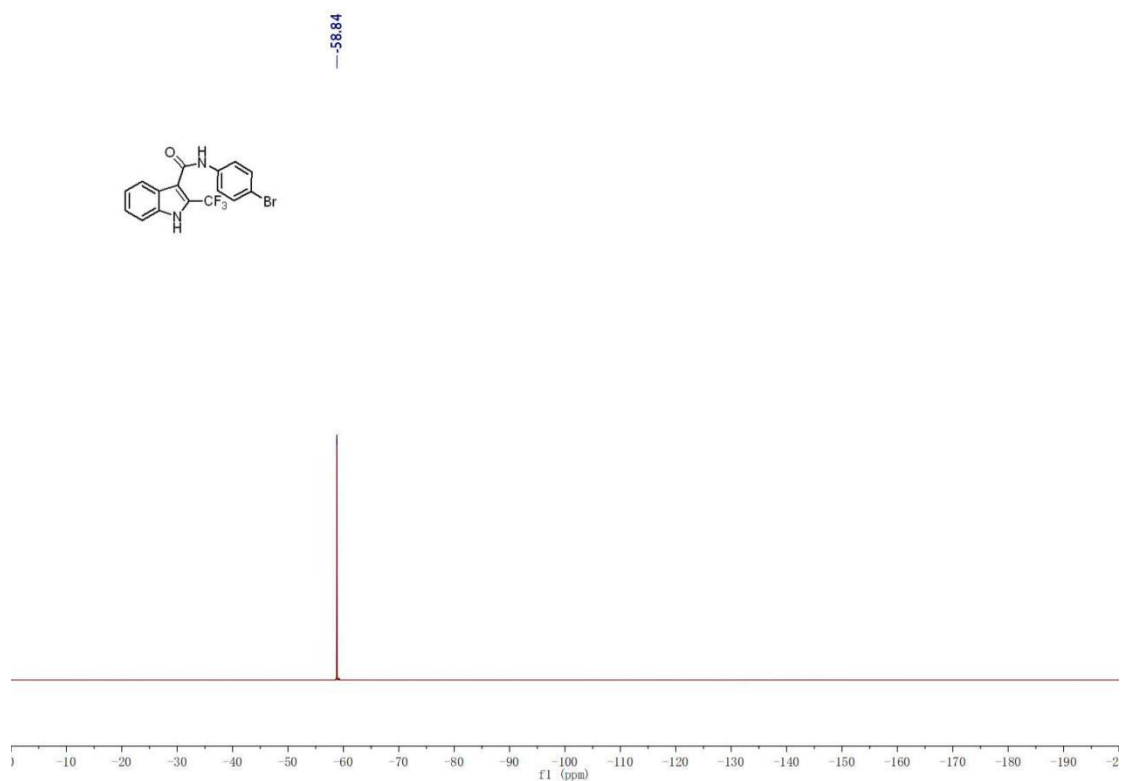

**<sup>1</sup>H NMR (400 MHz, Acetone-*d*<sub>6</sub>) spectrum of 3af**

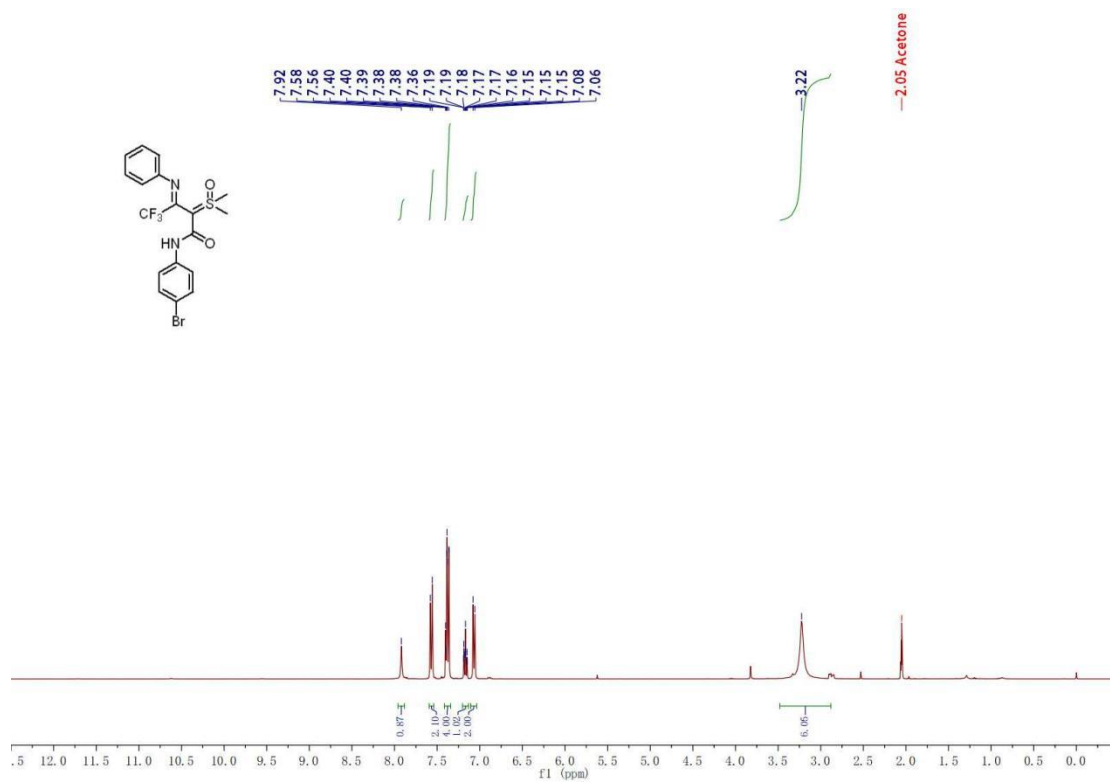

**$^{13}\text{C}$  NMR (150 MHz, Acetone- $d_6$ ) spectrum of 3af**

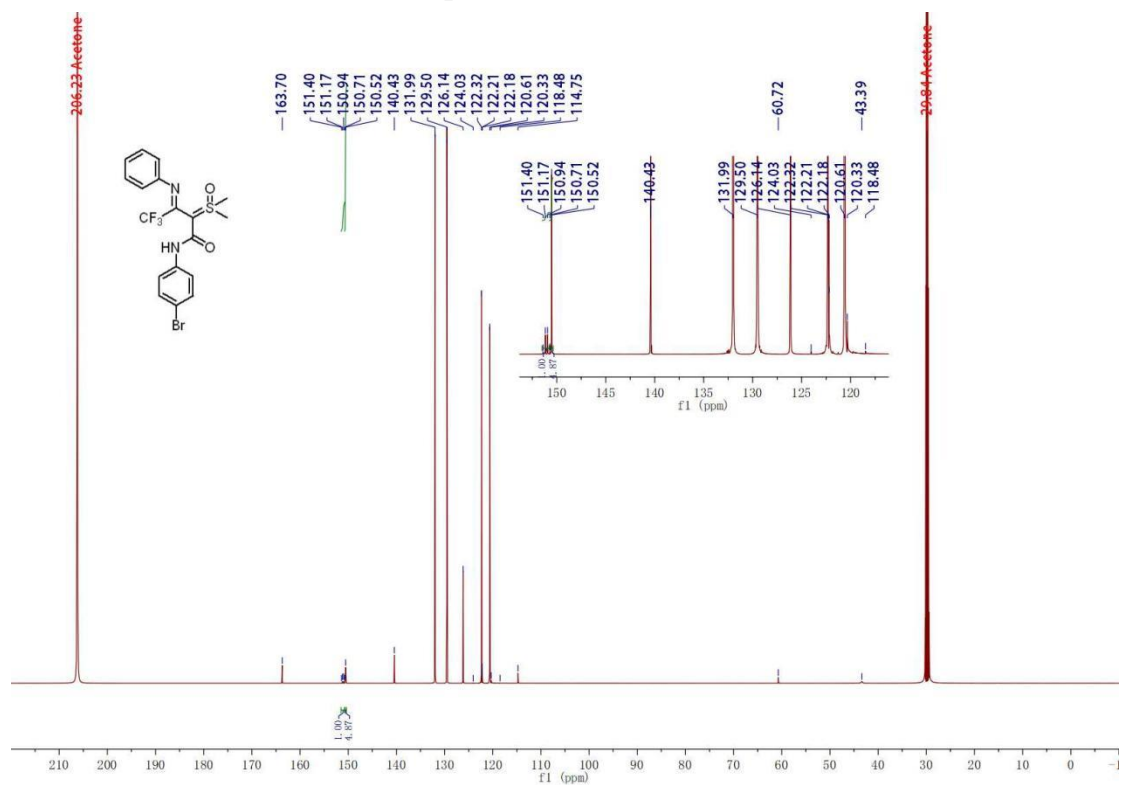

**$^{19}\text{F}$  NMR (376 MHz, Acetone- $d_6$ ) spectrum of 3af**

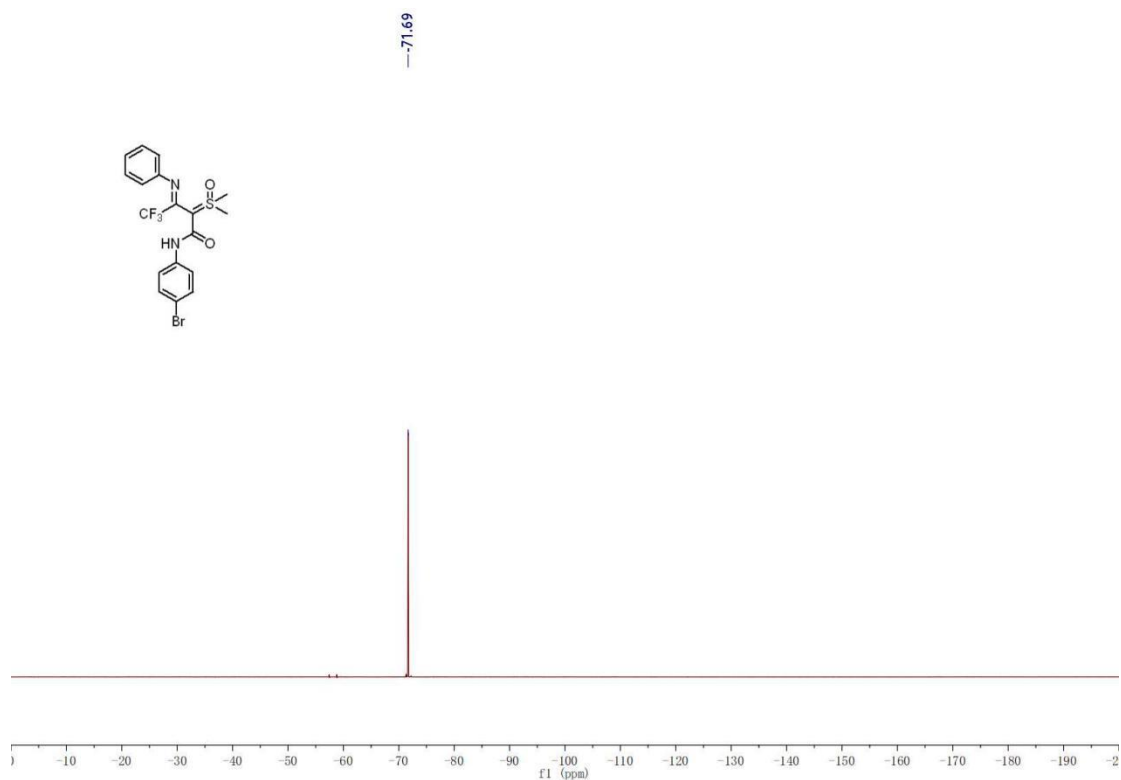

### <sup>1</sup>H NMR (400 MHz, Acetone-*d*<sub>6</sub>) spectrum of 3ag

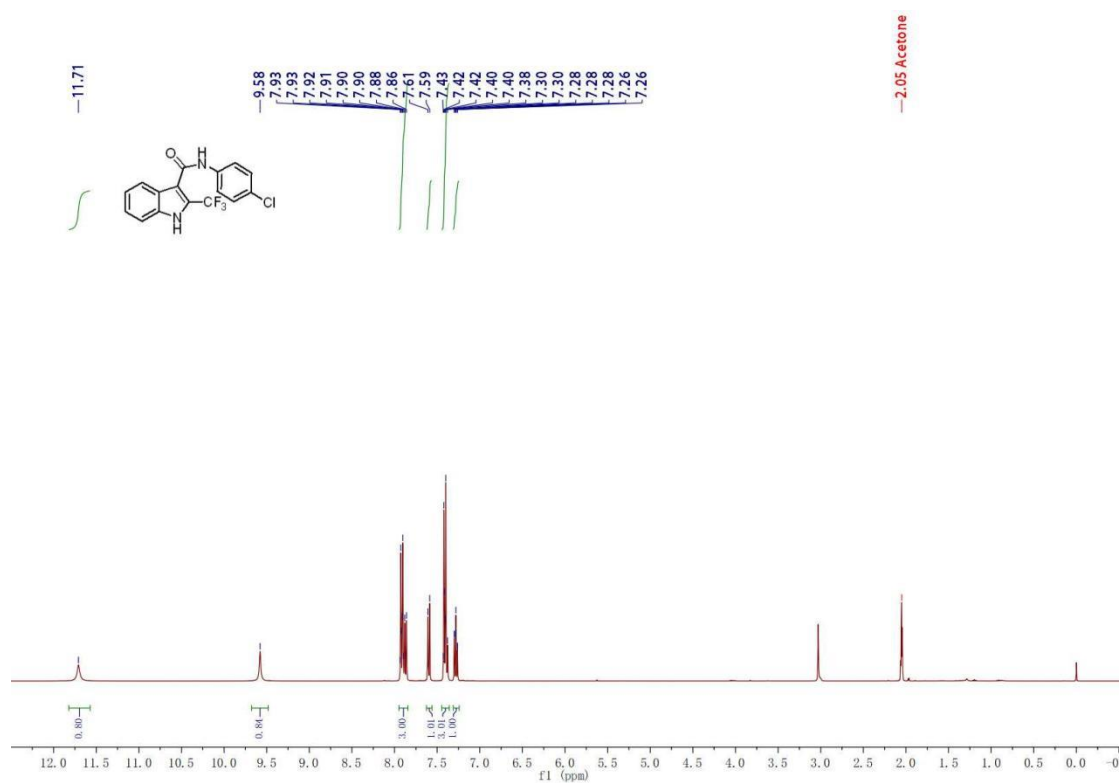

### <sup>13</sup>C NMR (100 MHz, Acetone-*d*<sub>6</sub>) spectrum of 3ag

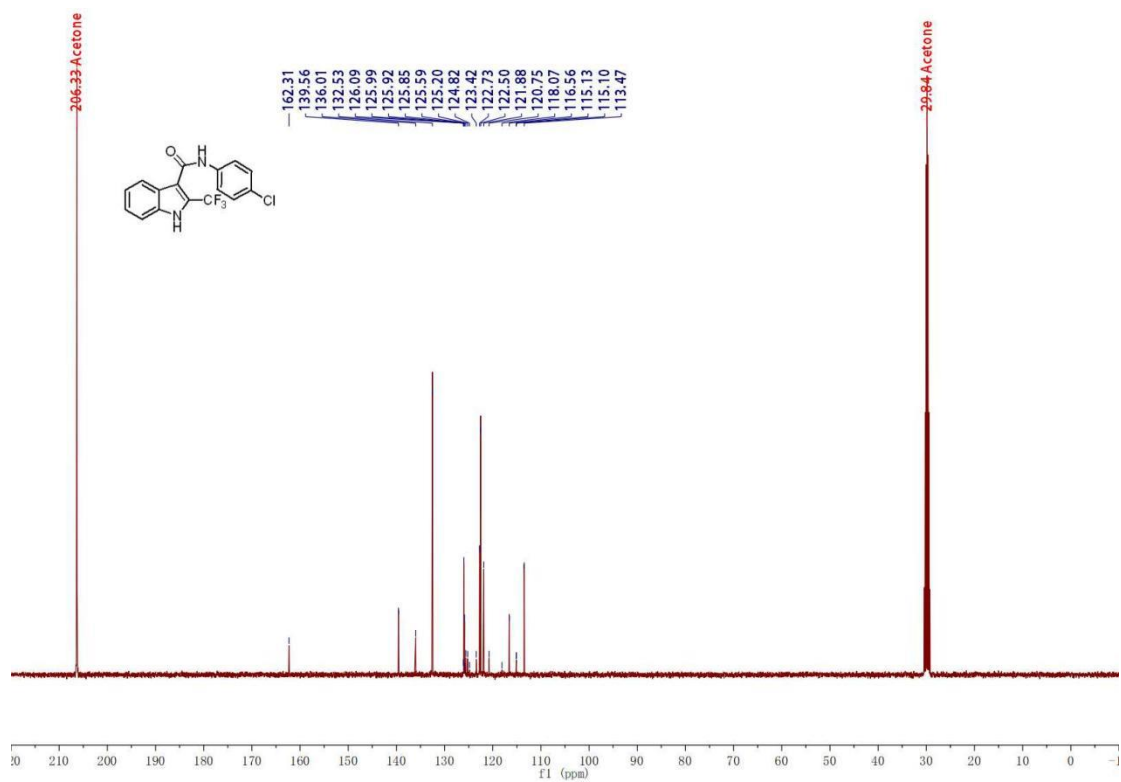

**<sup>19</sup>F NMR (376 MHz, Acetone-*d*<sub>6</sub>) spectrum of 3ag**

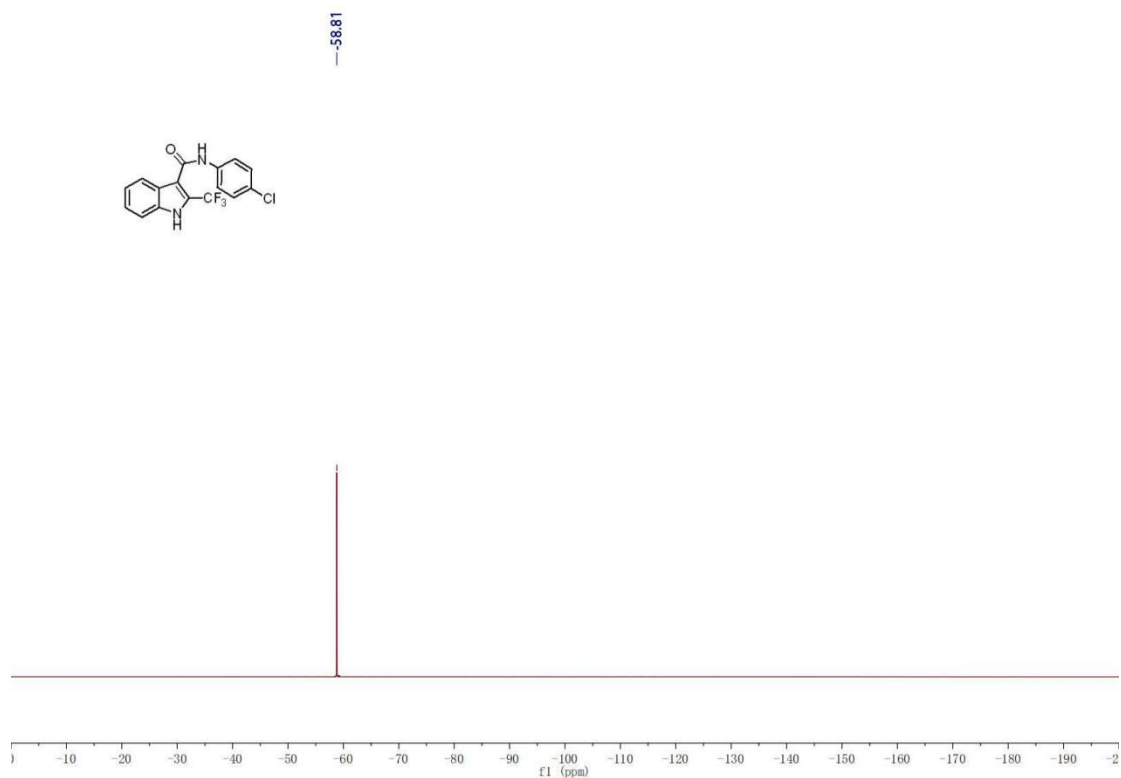

**<sup>1</sup>H NMR (400 MHz, Acetone-*d*<sub>6</sub>) spectrum of 3ah**

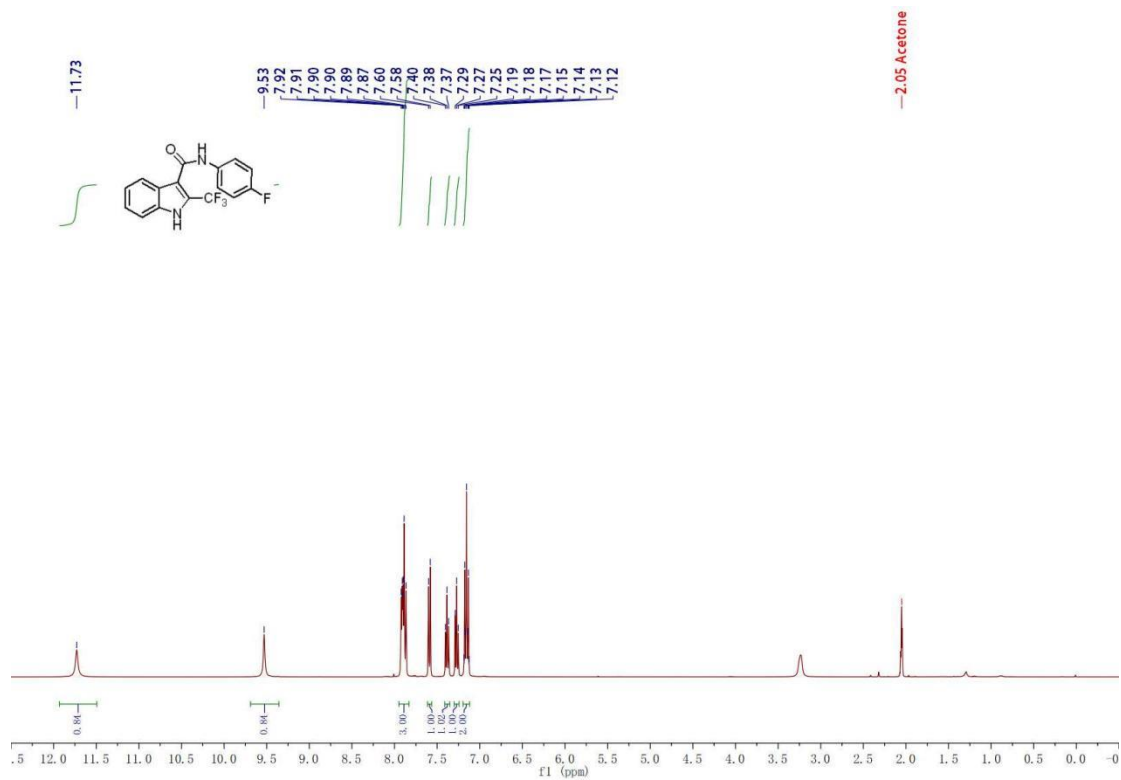

**<sup>13</sup>C NMR (100 MHz, Acetone-*d*<sub>6</sub>) spectrum of 3ah**

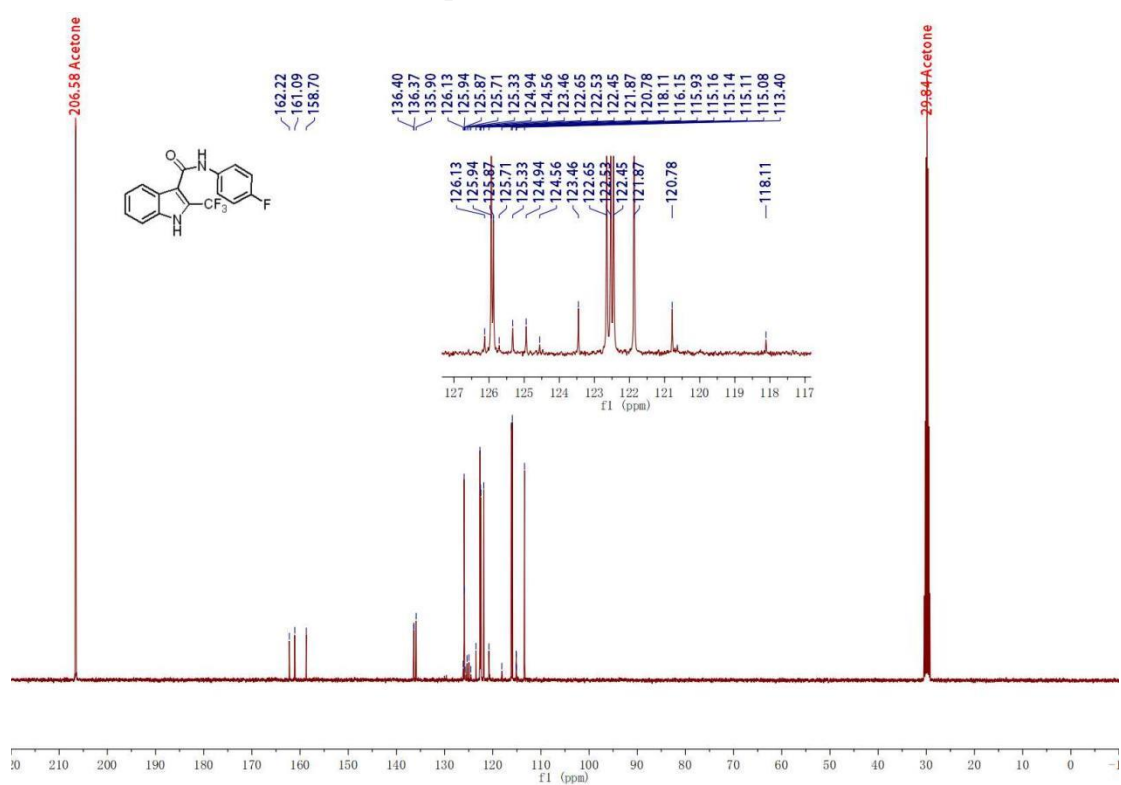

**<sup>19</sup>F NMR (376 MHz, Acetone-*d*<sub>6</sub>) spectrum of 3ah**

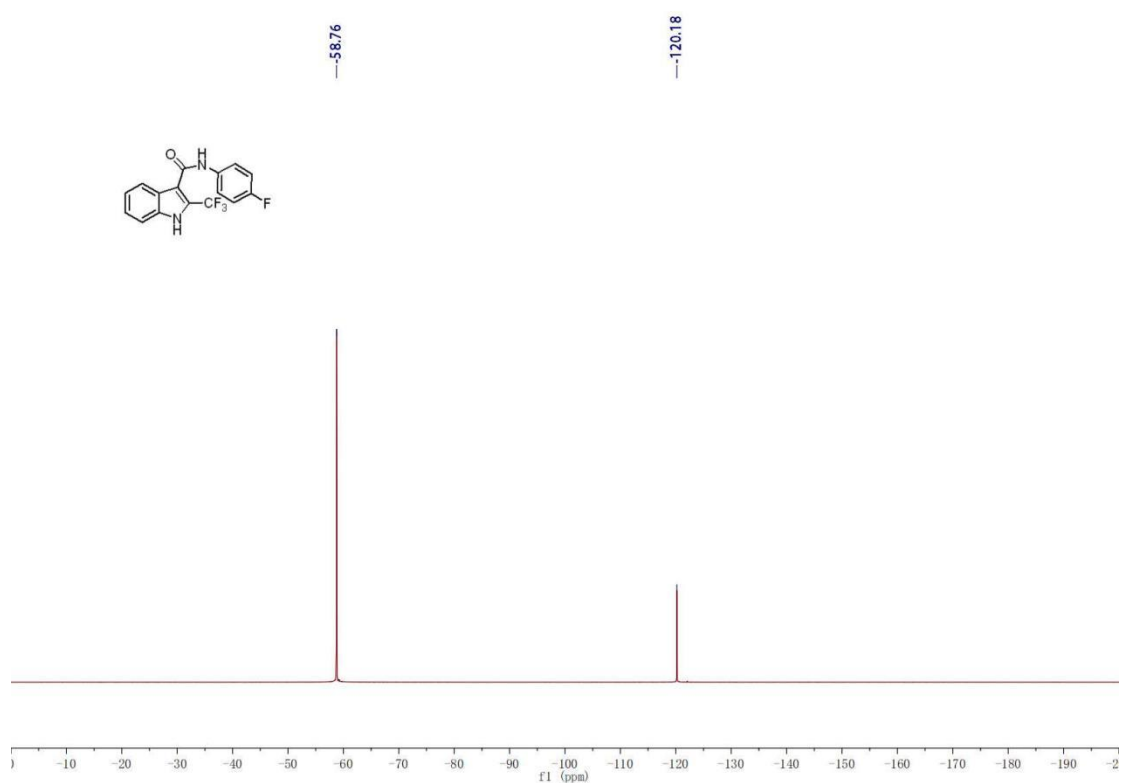

### <sup>1</sup>H NMR (400 MHz, Acetone-d<sub>6</sub>) spectrum of 3ai

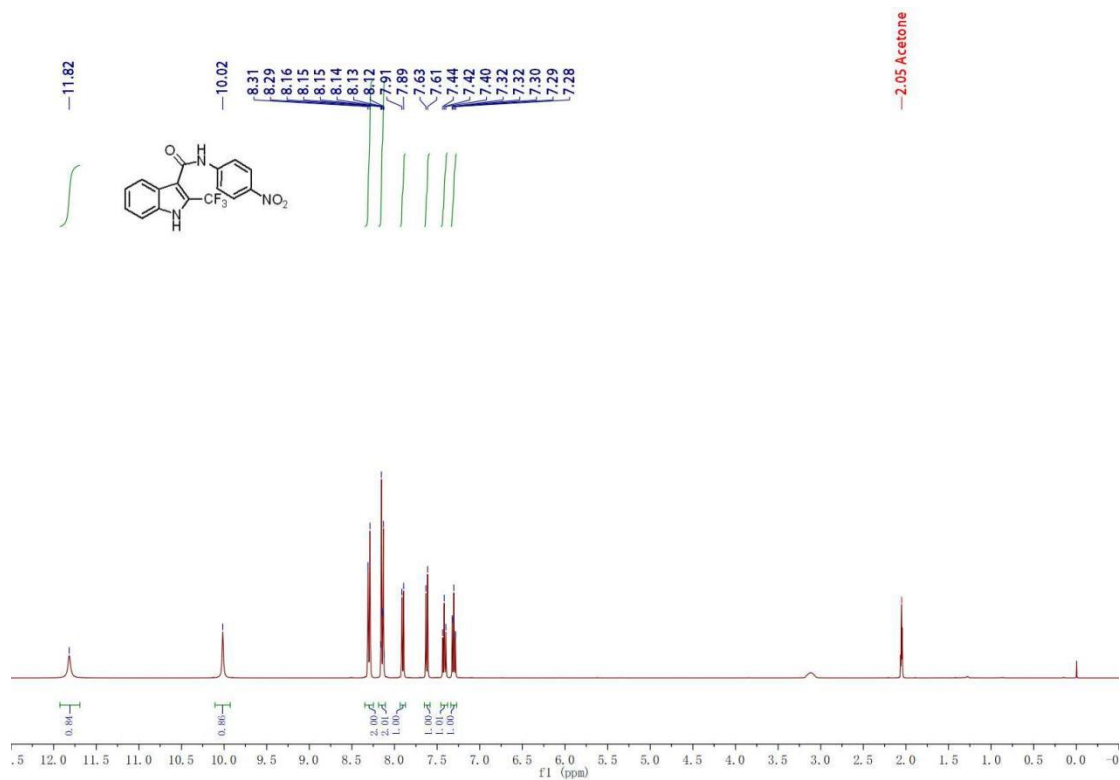

### <sup>13</sup>C NMR (100 MHz, Acetone-d<sub>6</sub>) spectrum of 3ai

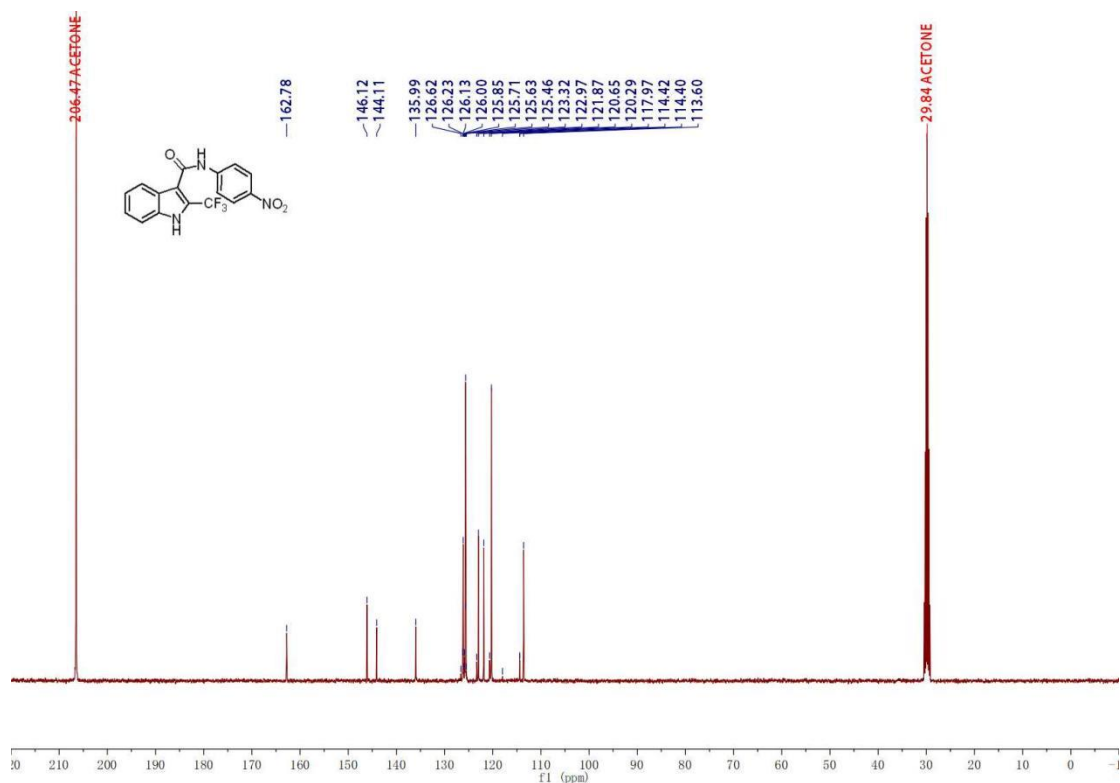

**<sup>19</sup>F NMR (376 MHz, Acetone-*d*<sub>6</sub>) spectrum of 3ai**

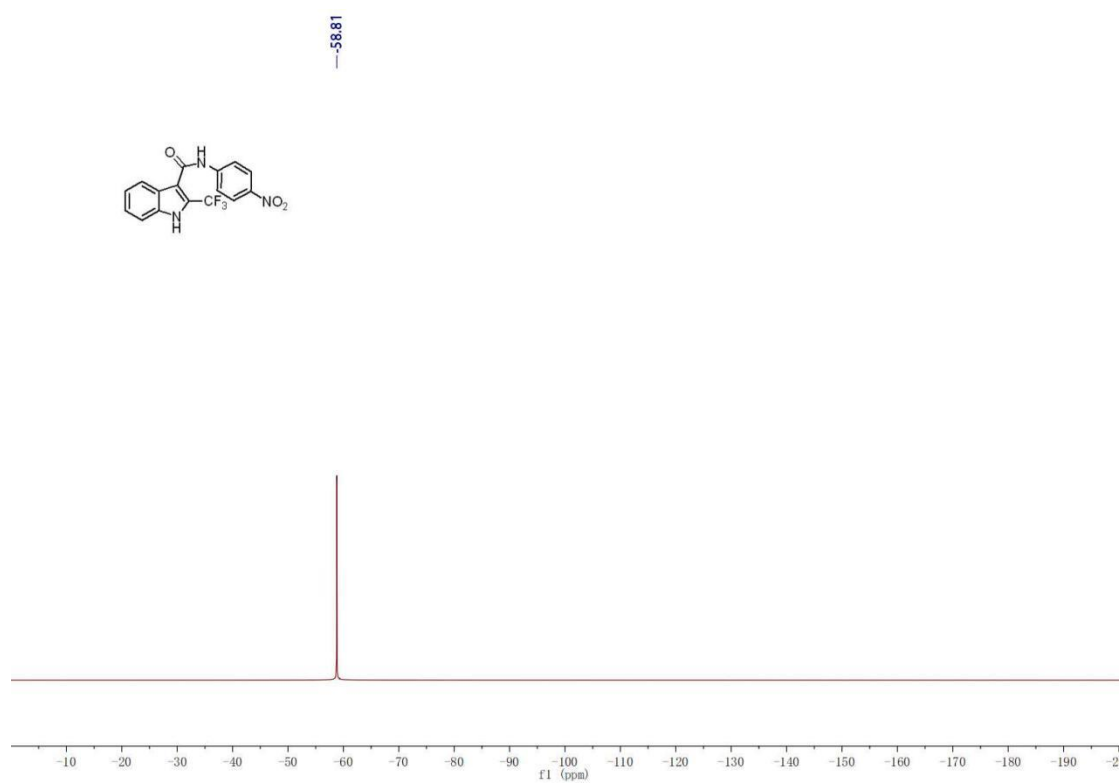

**<sup>1</sup>H NMR (400 MHz, Acetone-*d*<sub>6</sub>) spectrum of 3aj**

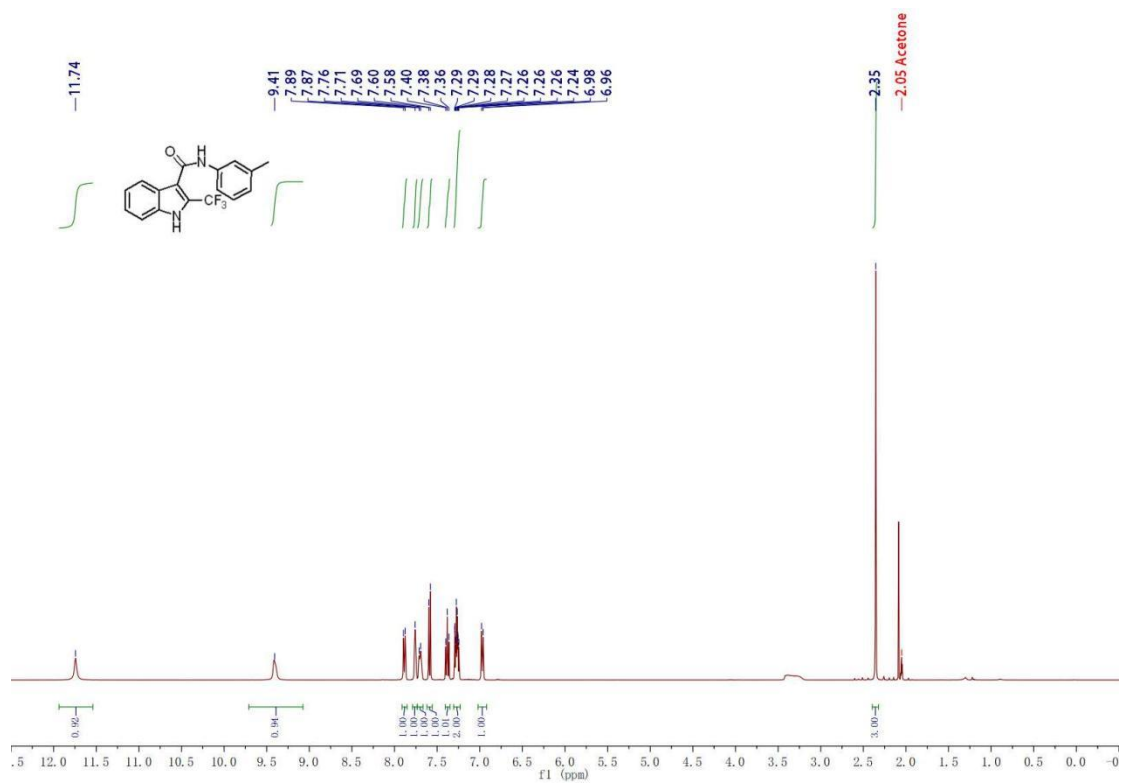



**<sup>13</sup>C NMR (100 MHz, Acetone-*d*<sub>6</sub>) spectrum of 3aj**

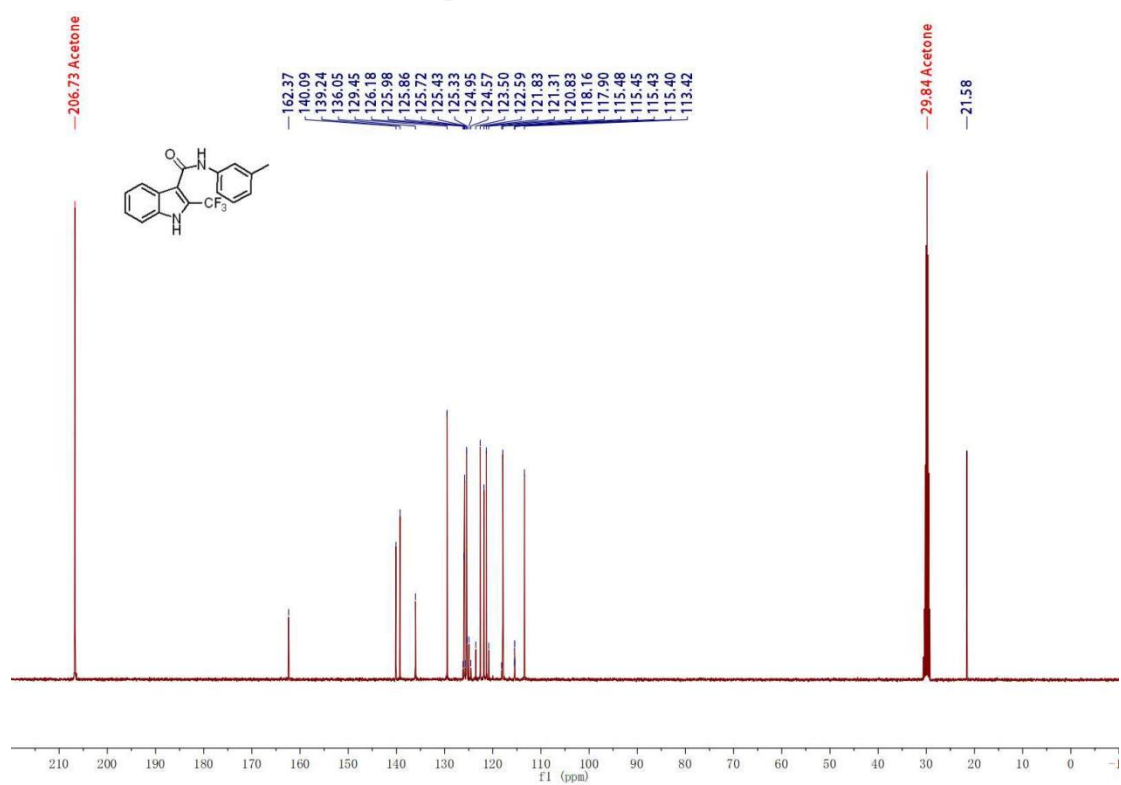

**<sup>19</sup>F NMR (376 MHz, Acetone-*d*<sub>6</sub>) spectrum of 3aj**

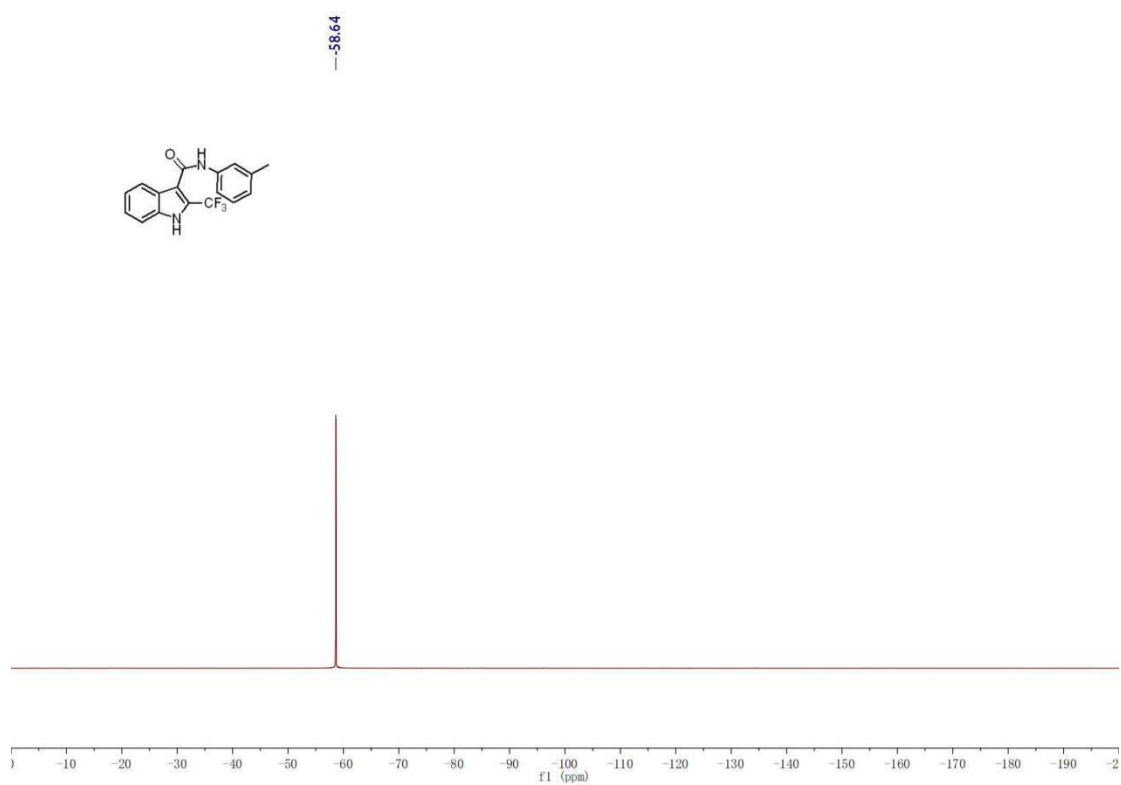

### <sup>1</sup>H NMR (400 MHz, Acetone-d<sub>6</sub>) spectrum of 3ak

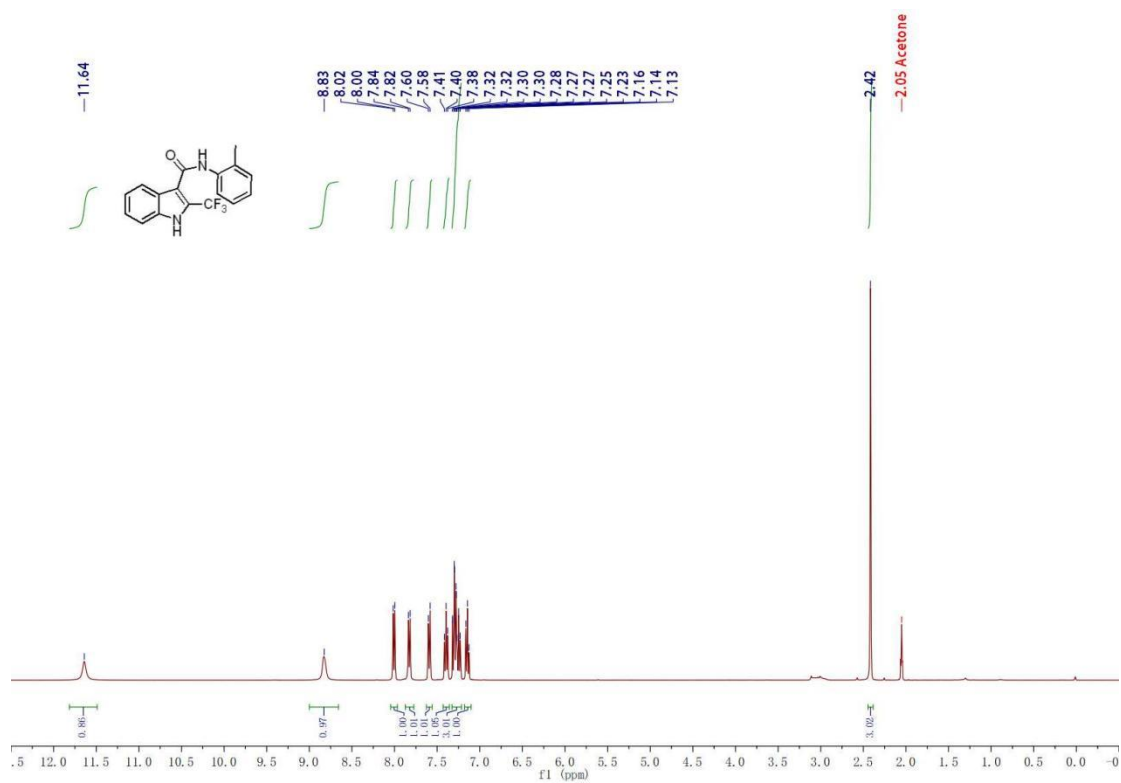

### <sup>13</sup>C NMR (100 MHz, Acetone-d<sub>6</sub>) spectrum of 3ak

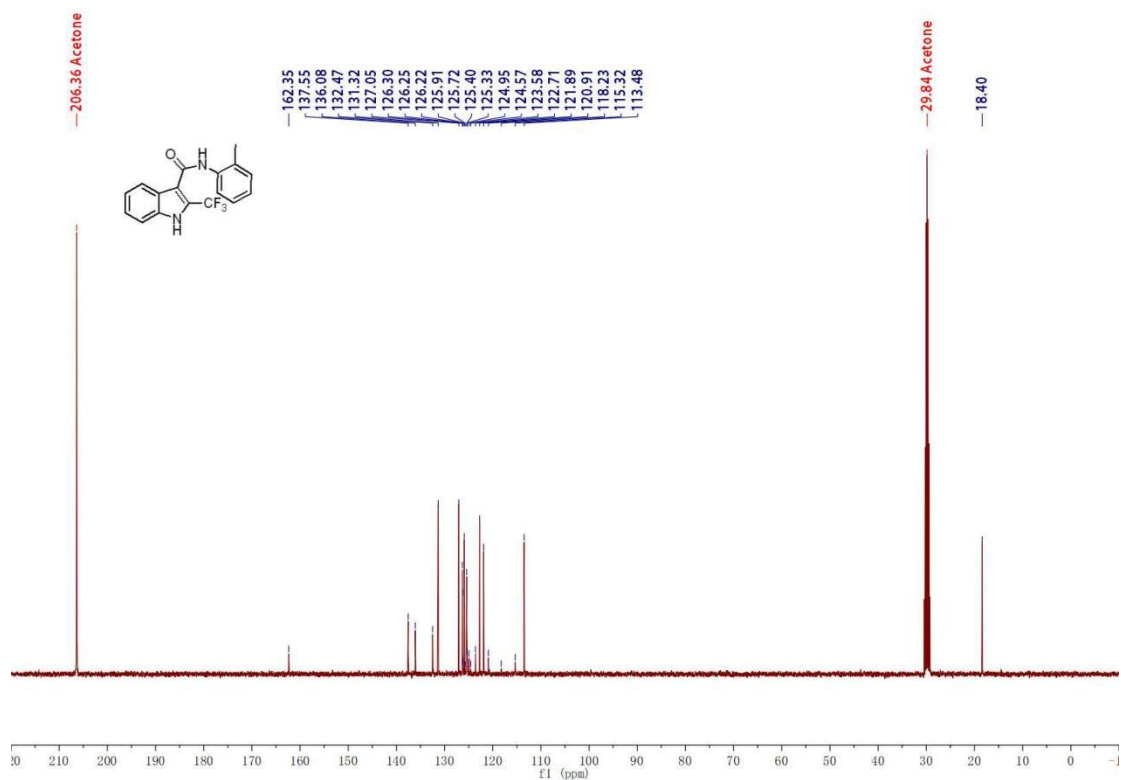

**<sup>19</sup>F NMR (376 MHz, Acetone-*d*<sub>6</sub>) spectrum of 3ak**

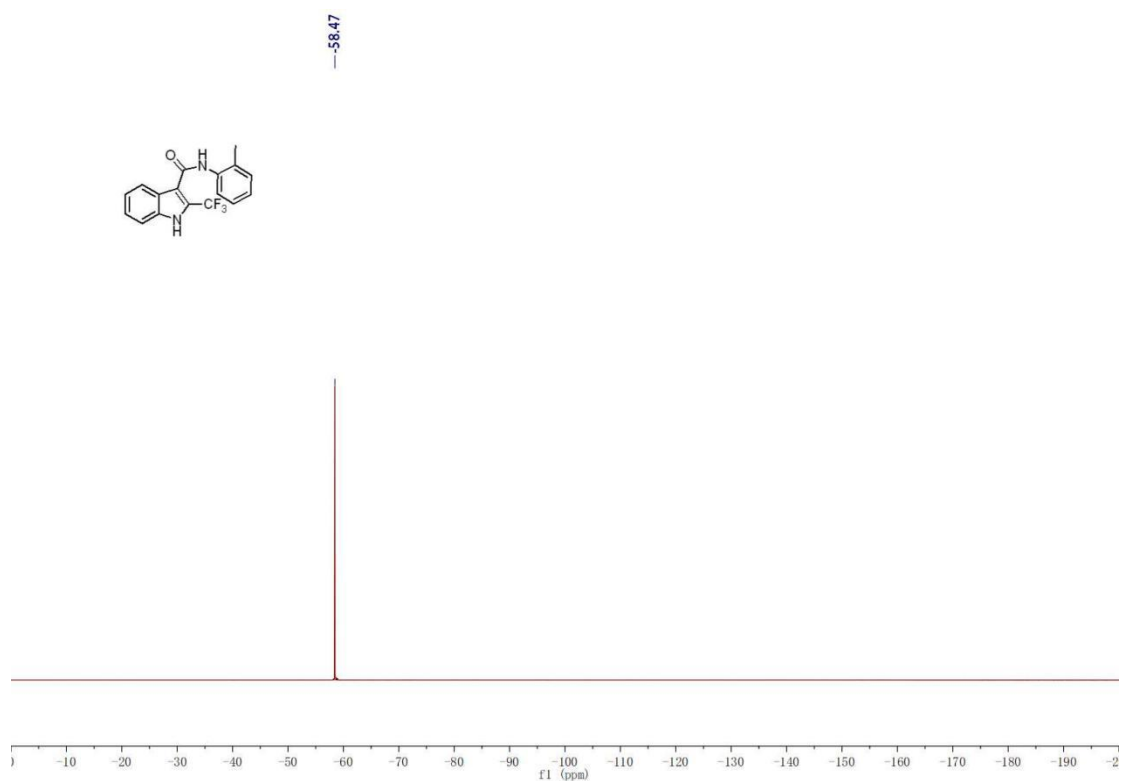

**<sup>1</sup>H NMR (400 MHz, CDCl<sub>3</sub>) spectrum of 3al**

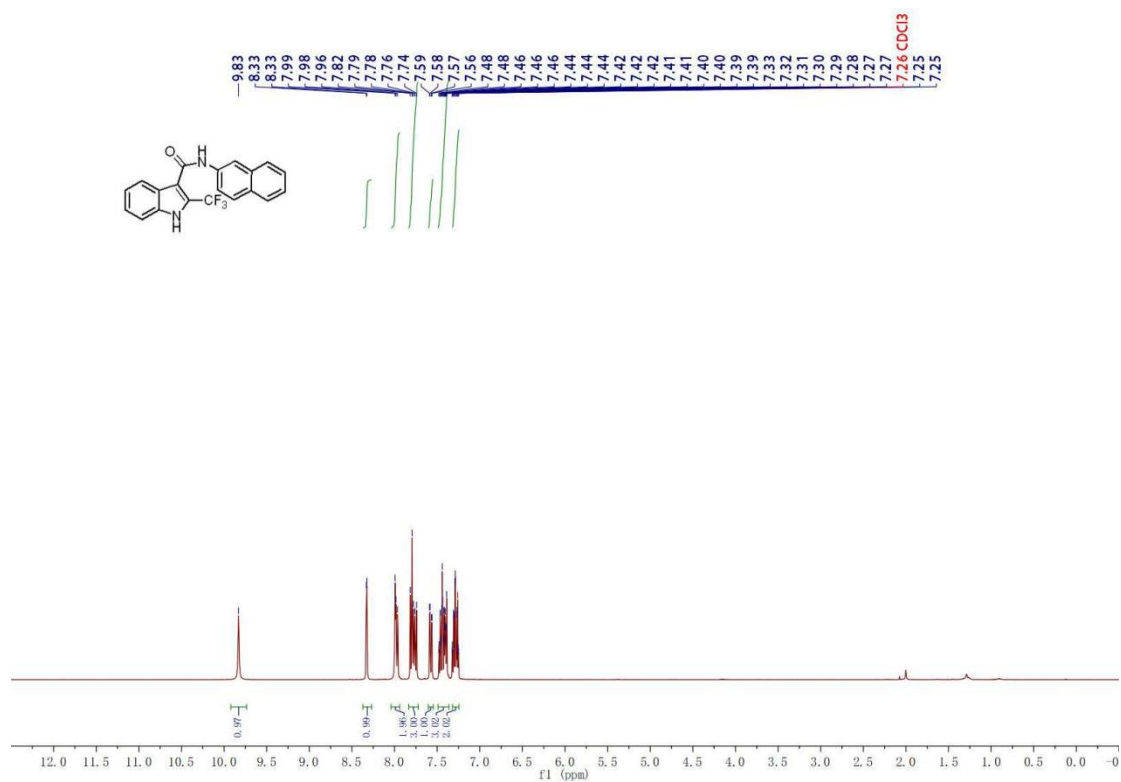

**<sup>13</sup>C NMR (100 MHz, CDCl<sub>3</sub>) spectrum of 3a**

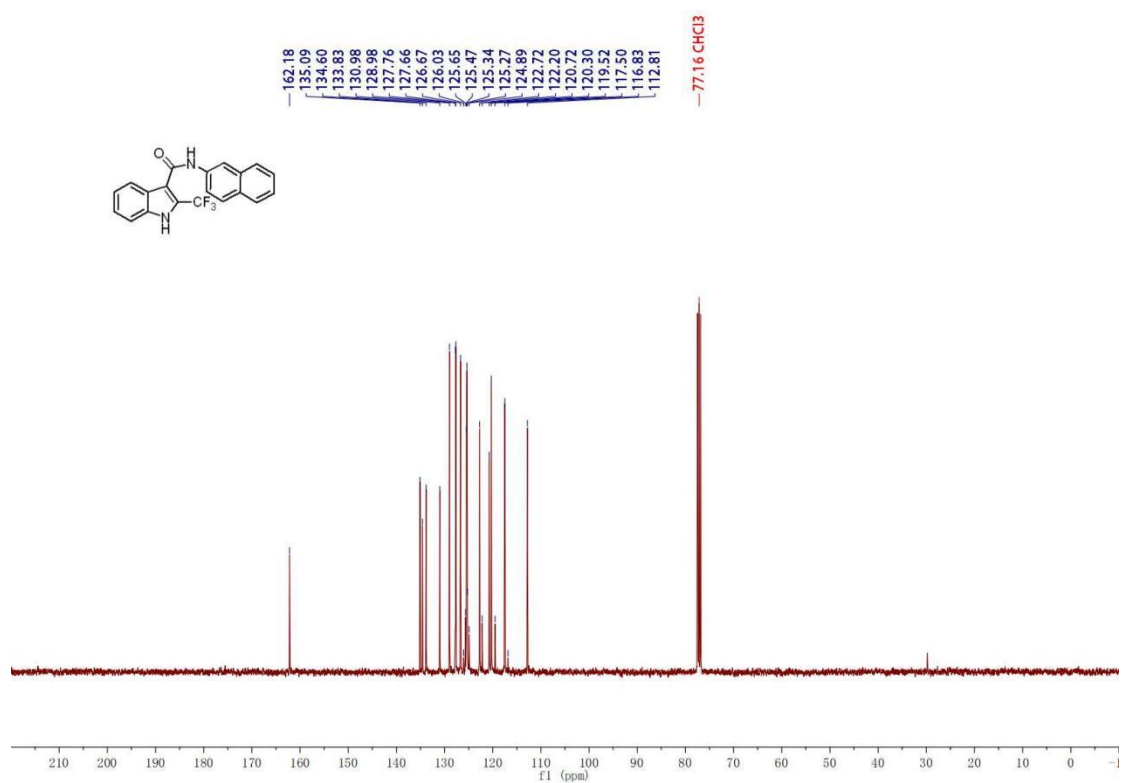

**<sup>19</sup>F NMR (376 MHz, CDCl<sub>3</sub>) spectrum of 3a**

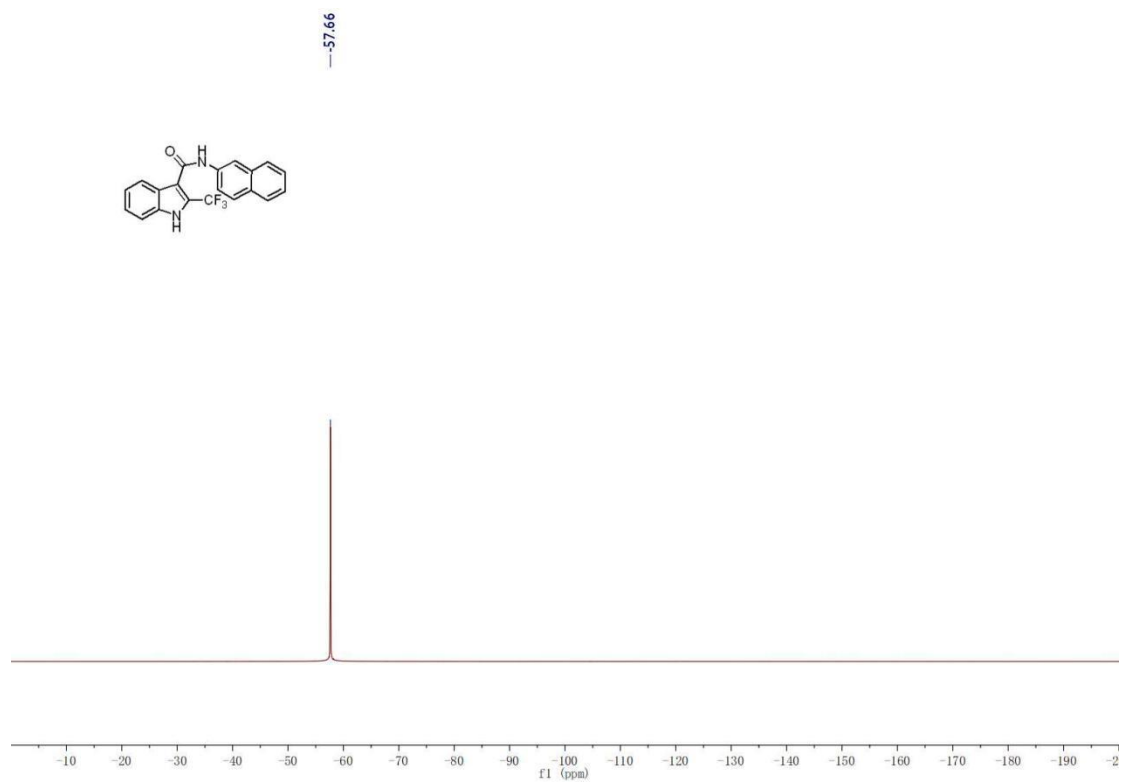

### <sup>1</sup>H NMR (400 MHz, Acetone-*d*<sub>6</sub>) spectrum of 3am

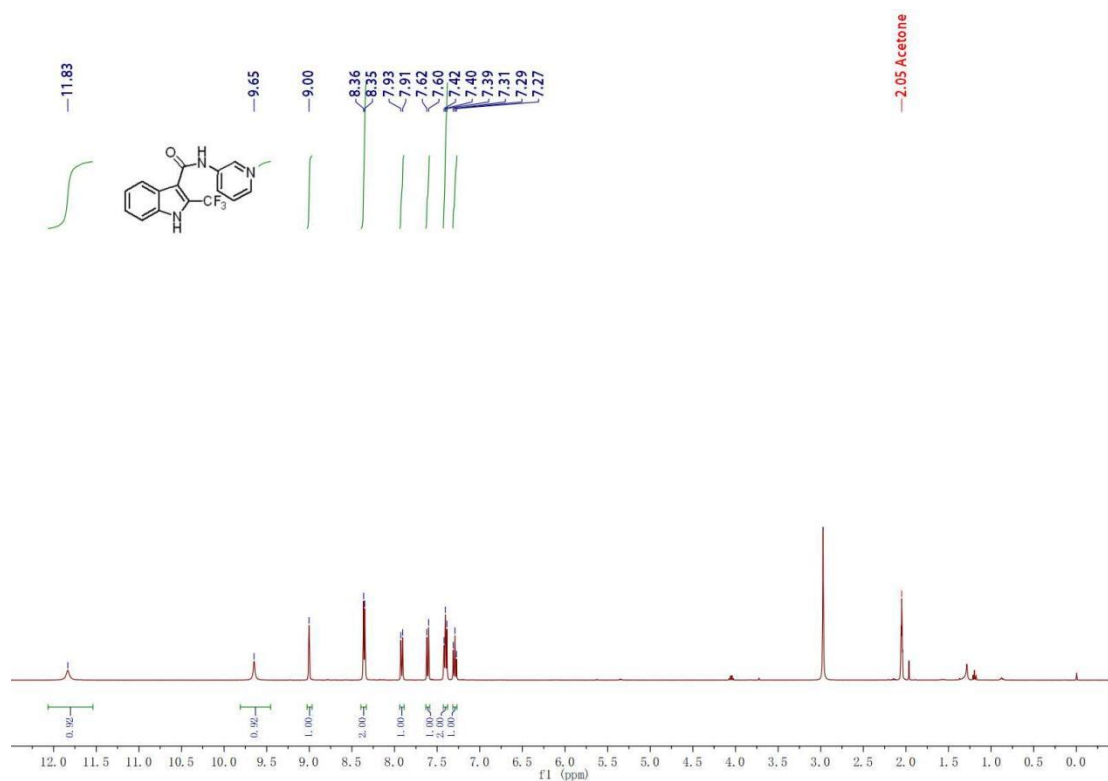

### <sup>13</sup>C NMR (150 MHz, Acetone-*d*<sub>6</sub>) spectrum of 3am

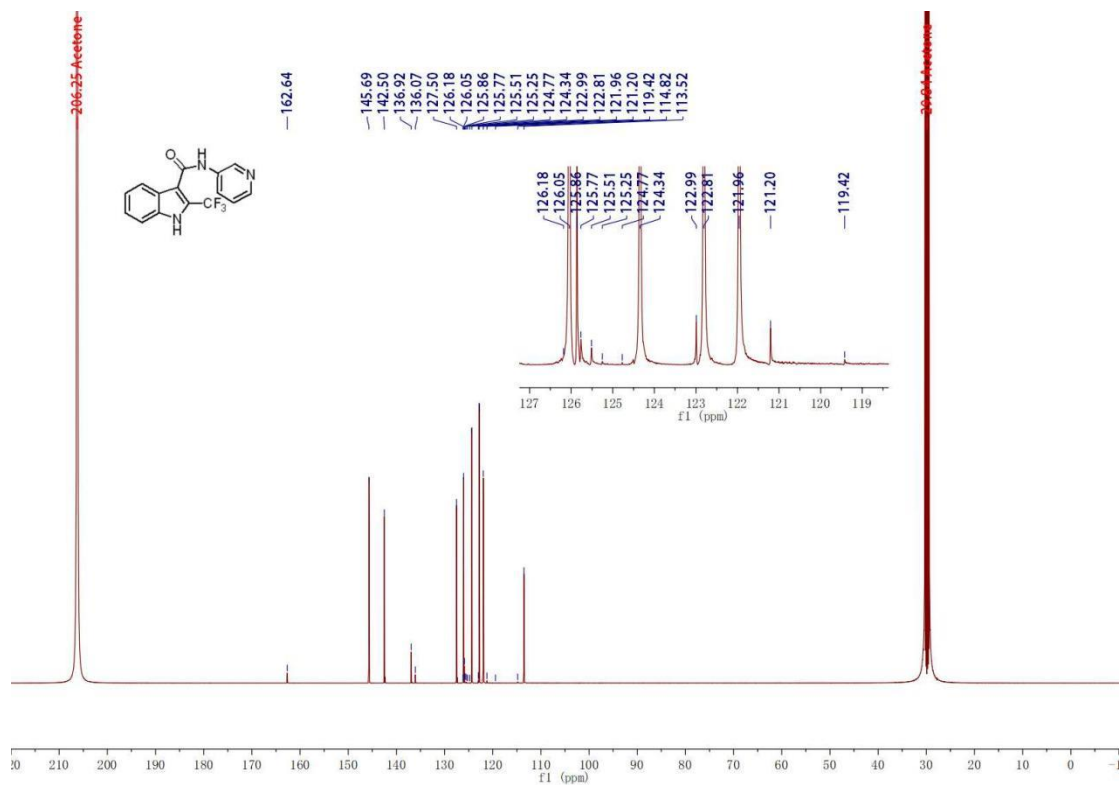

**<sup>19</sup>F NMR (376 MHz, Acetone-*d*<sub>6</sub>) spectrum of 3am**

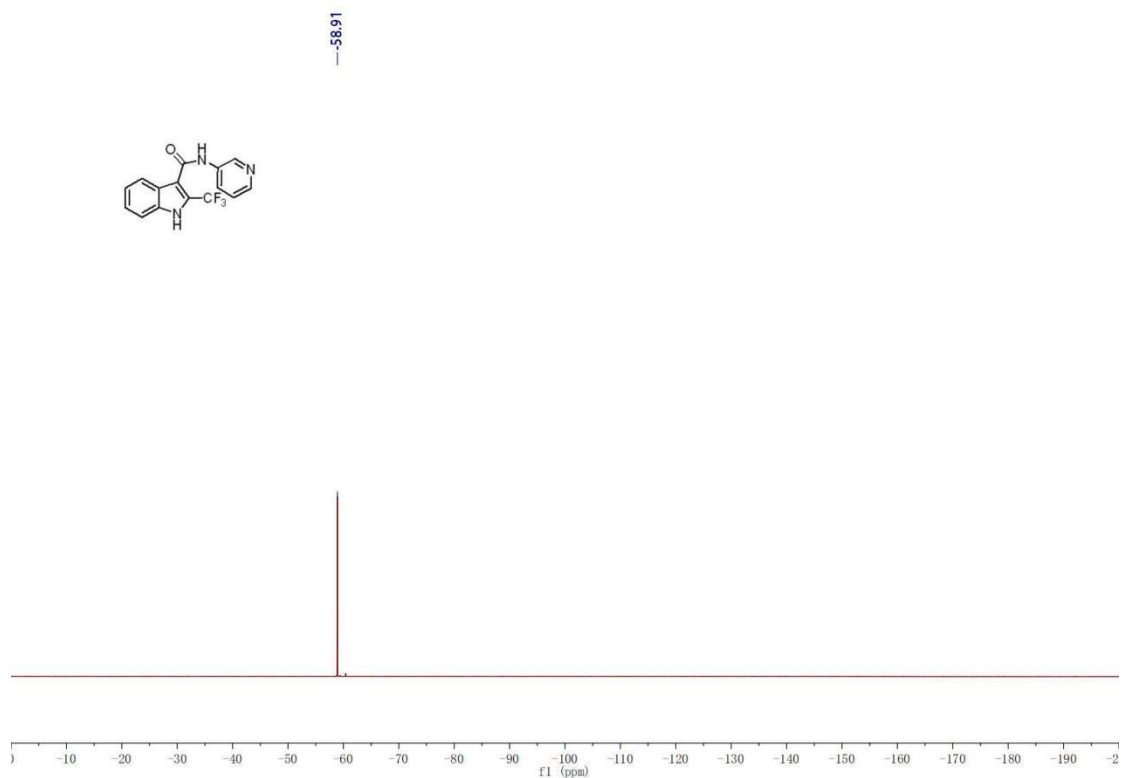

**<sup>1</sup>H NMR (400 MHz, Acetone-*d*<sub>6</sub>) spectrum of 3an**

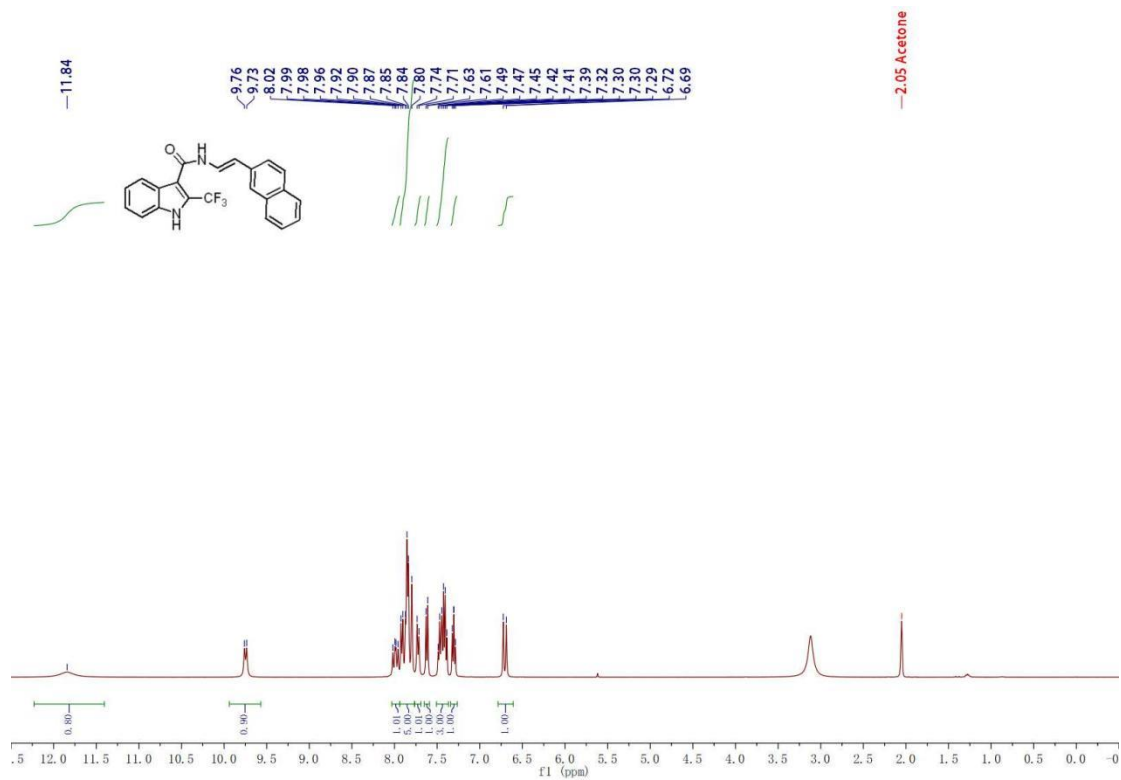

**<sup>13</sup>C NMR (150 MHz, Acetone-*d*<sub>6</sub>) spectrum of 3an**

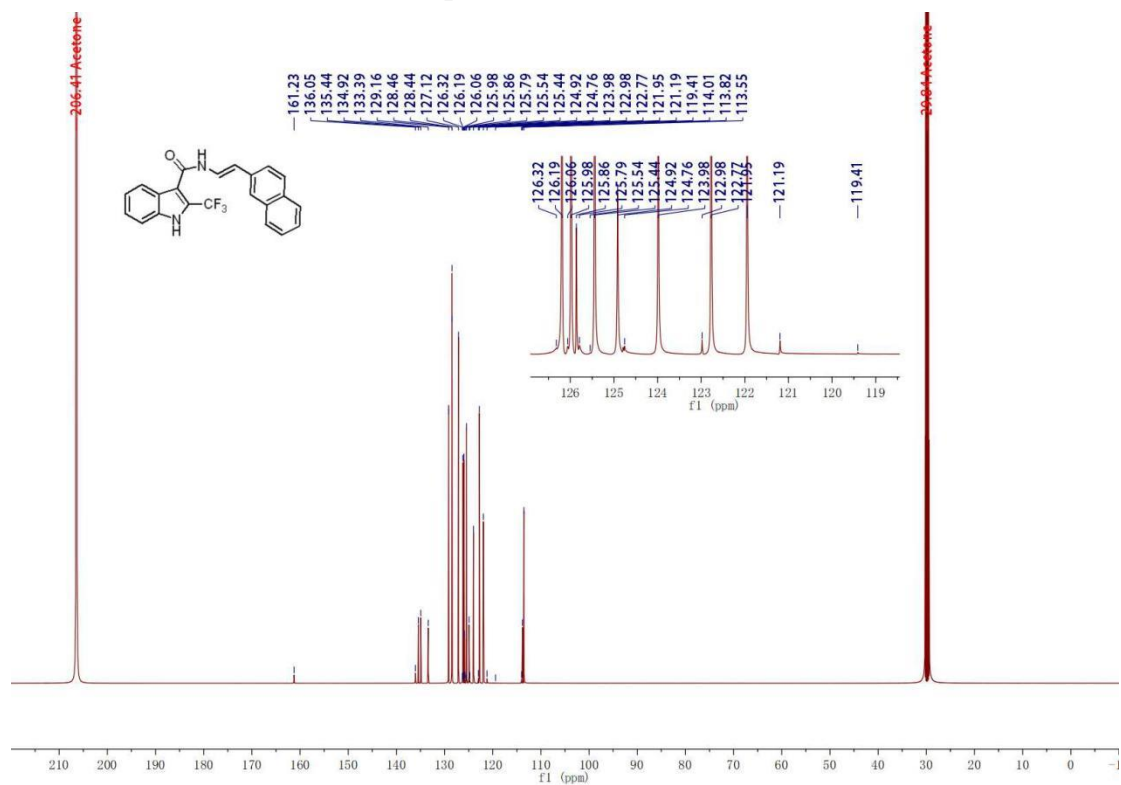

**<sup>19</sup>F NMR (376 MHz, Acetone-*d*<sub>6</sub>) spectrum of 3an**

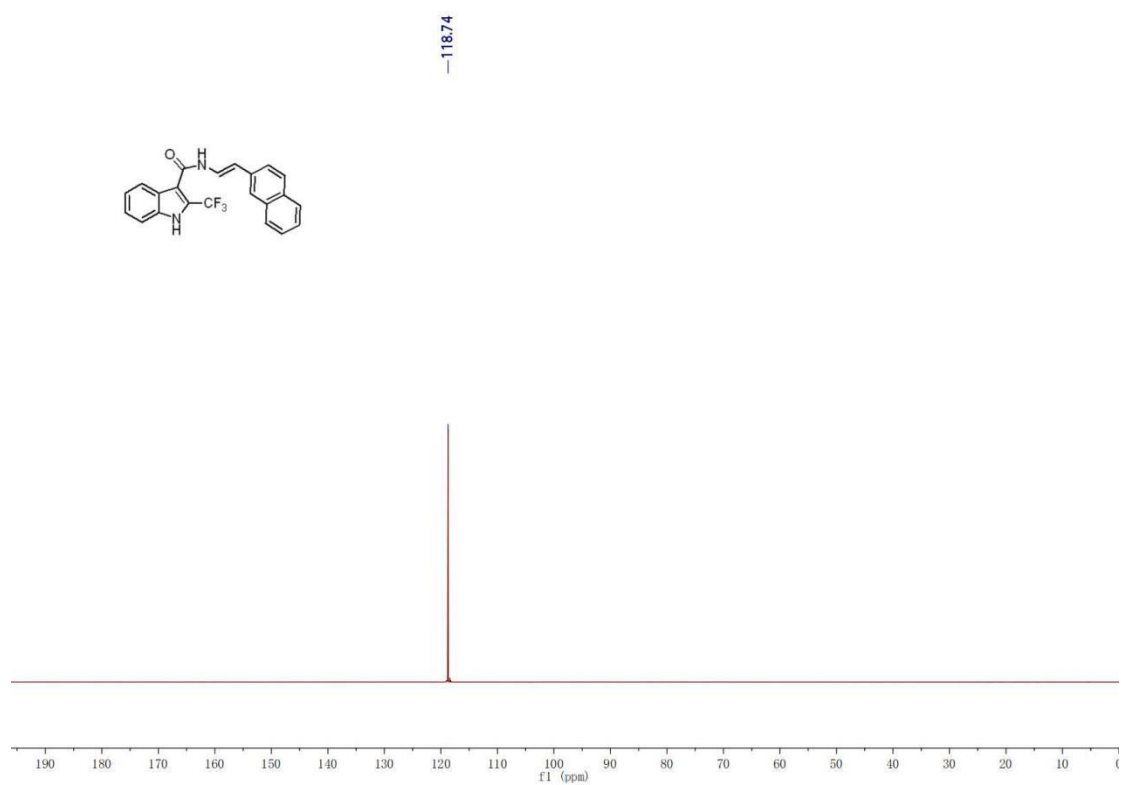

**<sup>1</sup>H NMR (400 MHz, CDCl<sub>3</sub>) spectrum of 3ao**

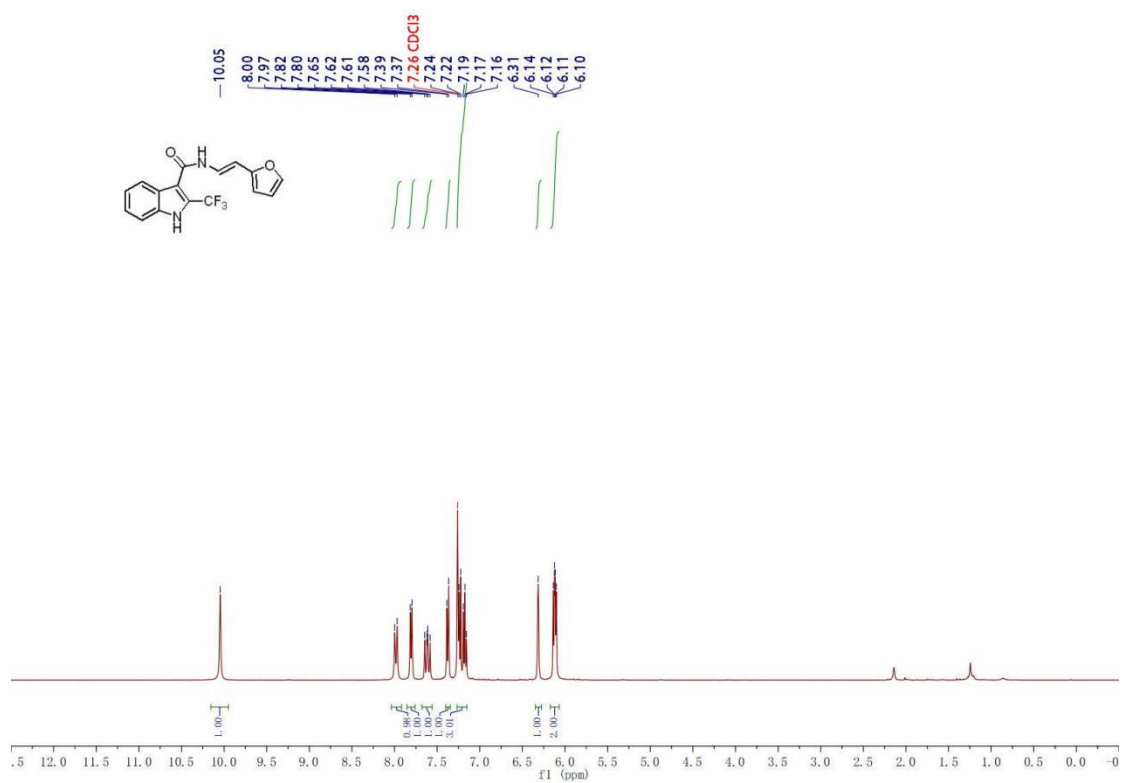

**<sup>13</sup>C NMR (100 MHz, CDCl<sub>3</sub>) spectrum of 3ao**

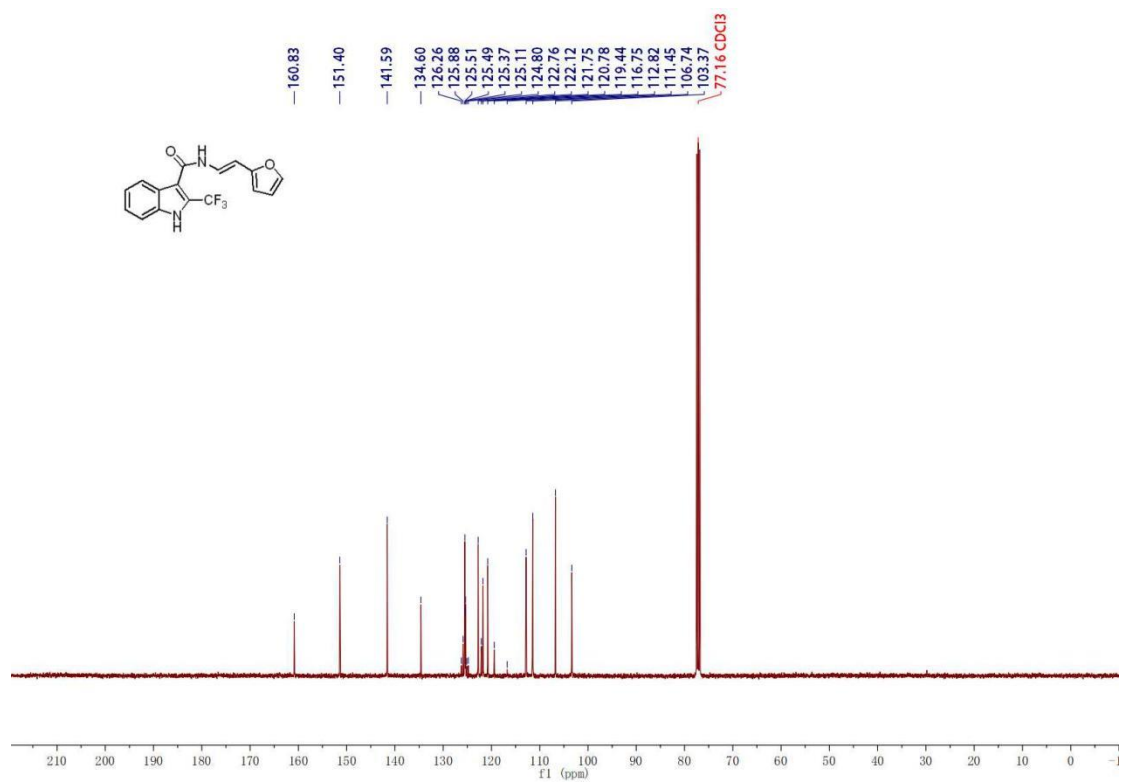



**$^{19}\text{F}$  NMR (376 MHz,  $\text{CDCl}_3$ ) spectrum of 3ao**

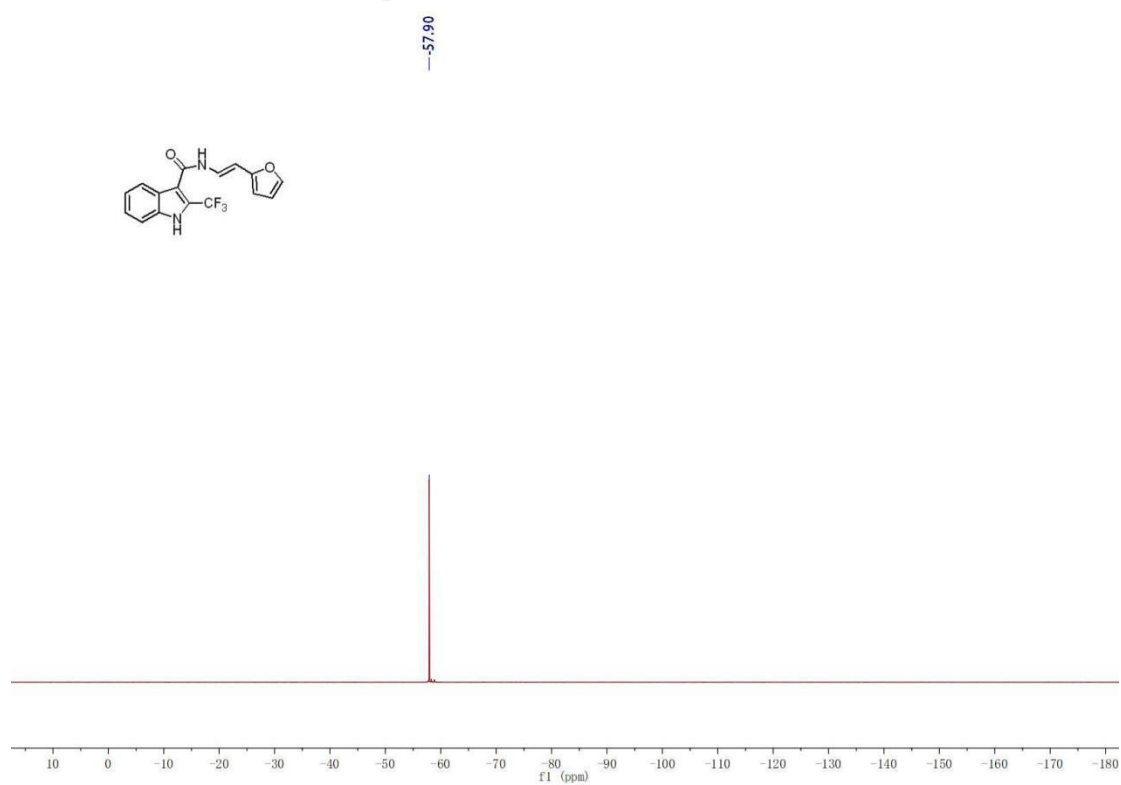

**$^1\text{H}$  NMR (400 MHz,  $\text{CDCl}_3$ ) spectrum of 3ap**

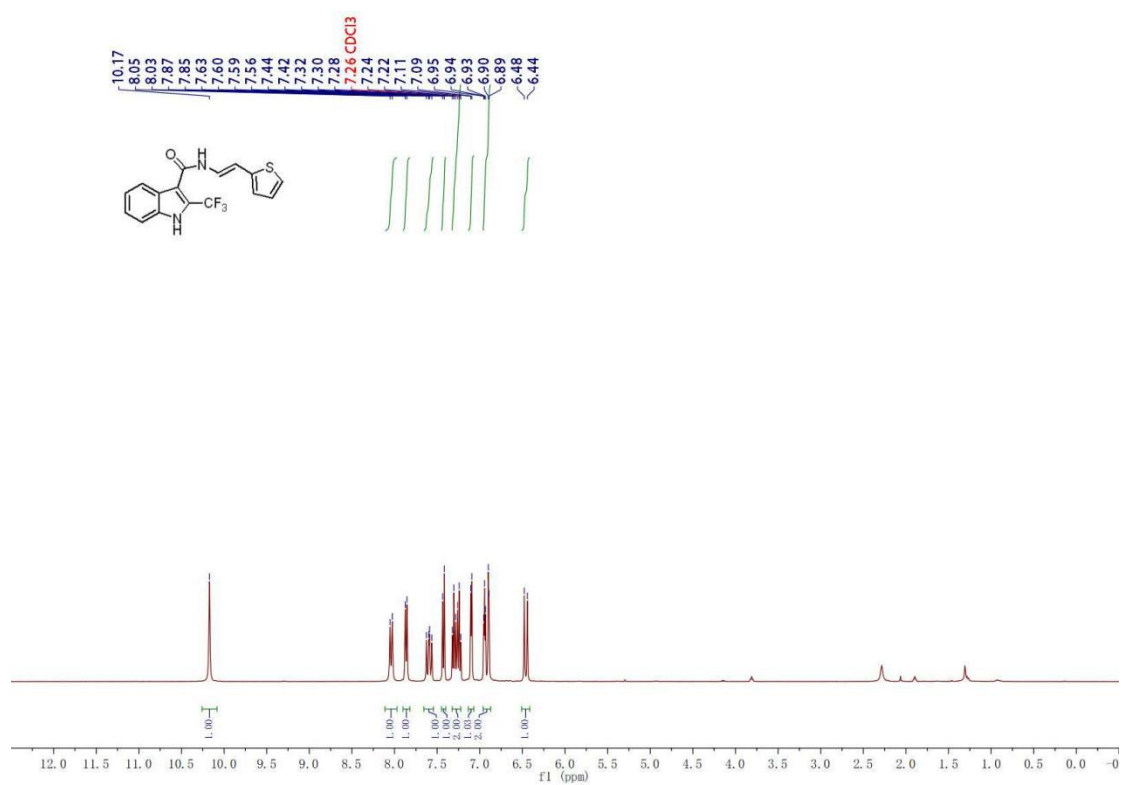

**<sup>13</sup>C NMR (150 MHz, CDCl<sub>3</sub>) spectrum of 3ap**

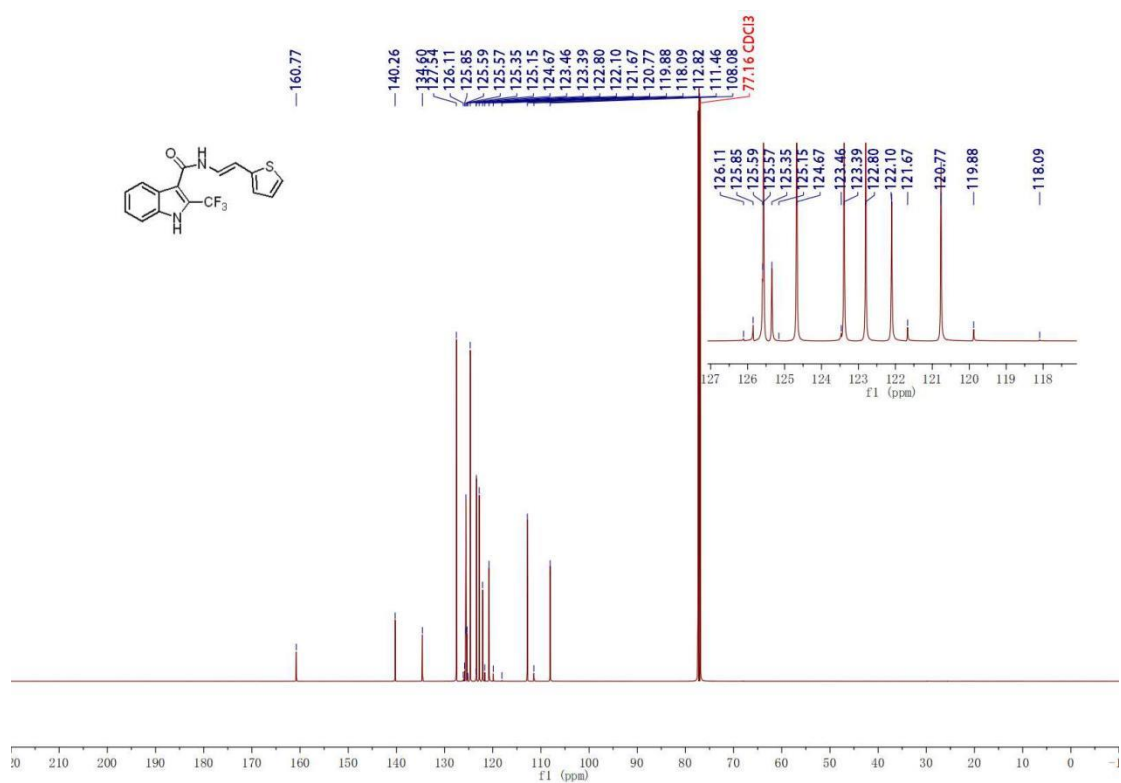

**<sup>19</sup>F NMR (376 MHz, CDCl<sub>3</sub>) spectrum of 3ap**

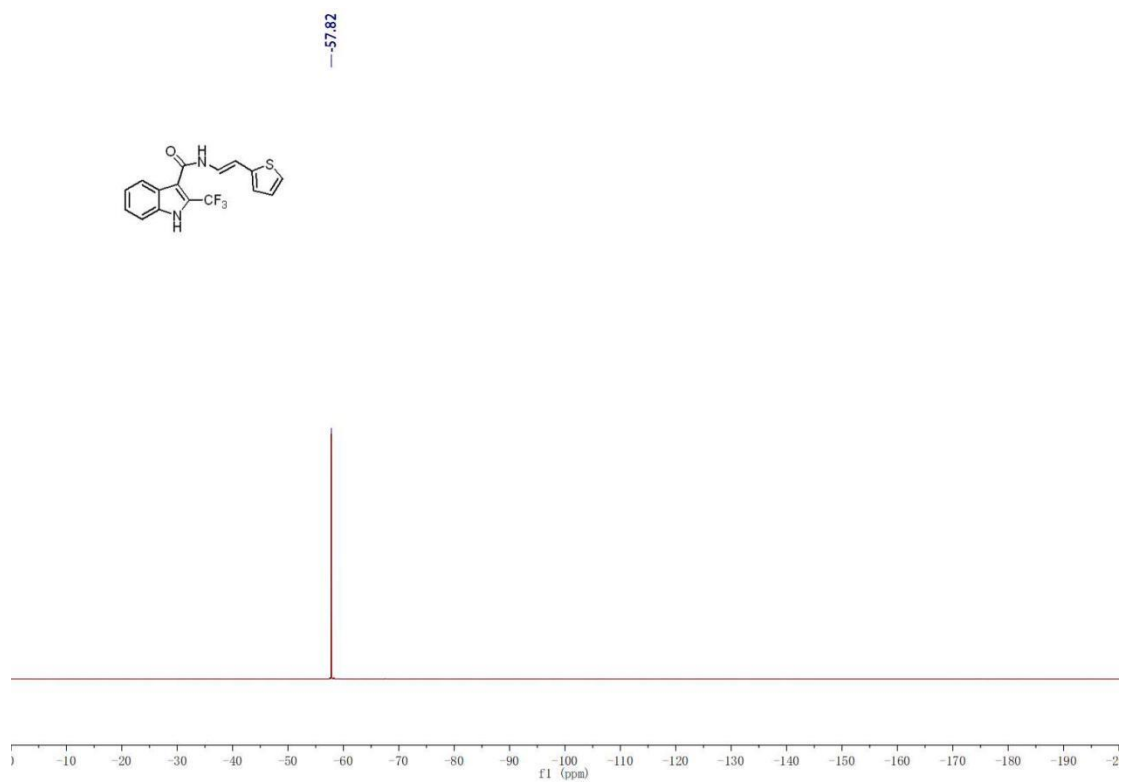

**<sup>1</sup>H NMR (400 MHz, CDCl<sub>3</sub>) spectrum of 3qb'**

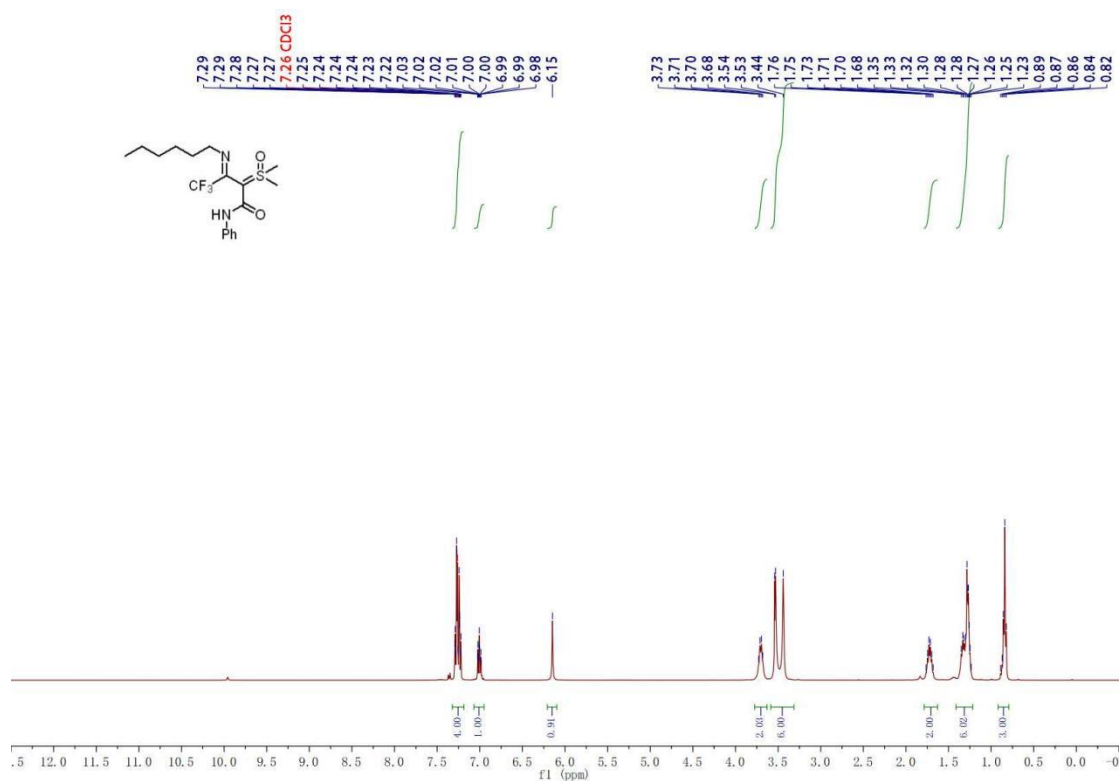

**<sup>13</sup>C NMR (150 MHz, CDCl<sub>3</sub>) spectrum of 3qb'**

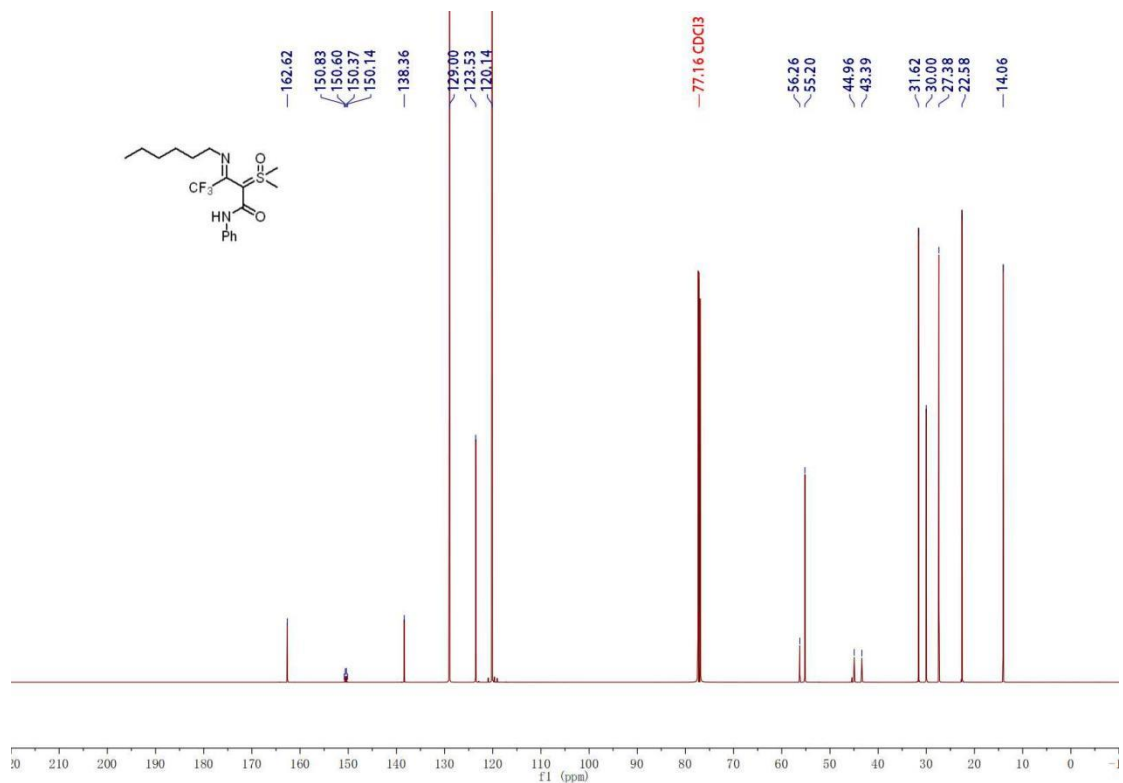

**$^{19}\text{F}$  NMR (376 MHz,  $\text{CDCl}_3$ ) spectrum of 3qb'**

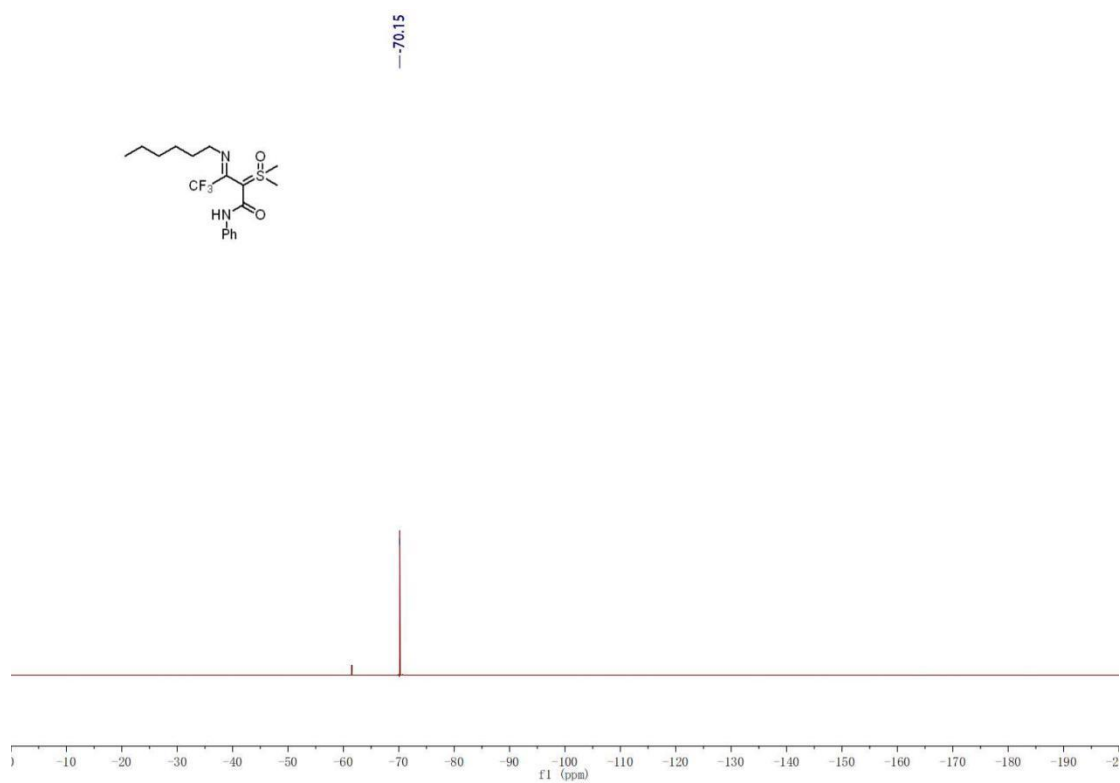

**$^1\text{H}$  NMR (400 MHz, Acetone- $d_6$ ) spectrum of 4ea**

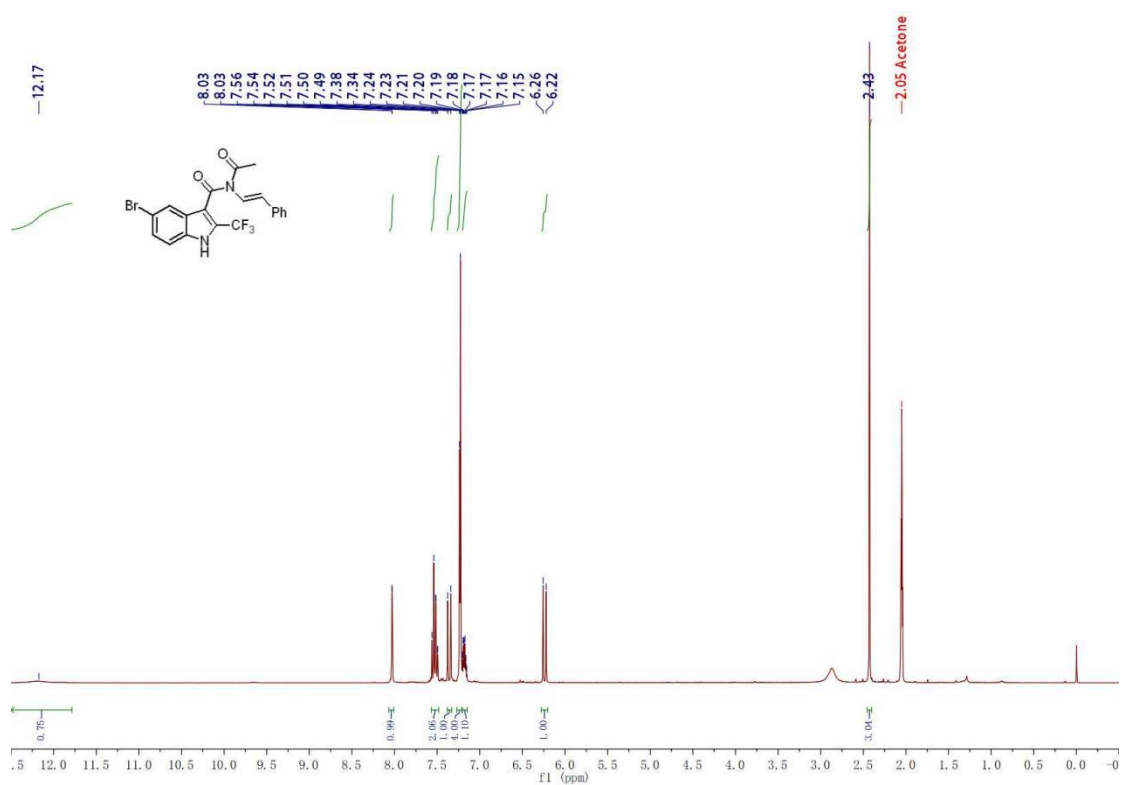

**<sup>13</sup>C NMR (150 MHz, Acetone-*d*<sub>6</sub>) spectrum of 4ea**

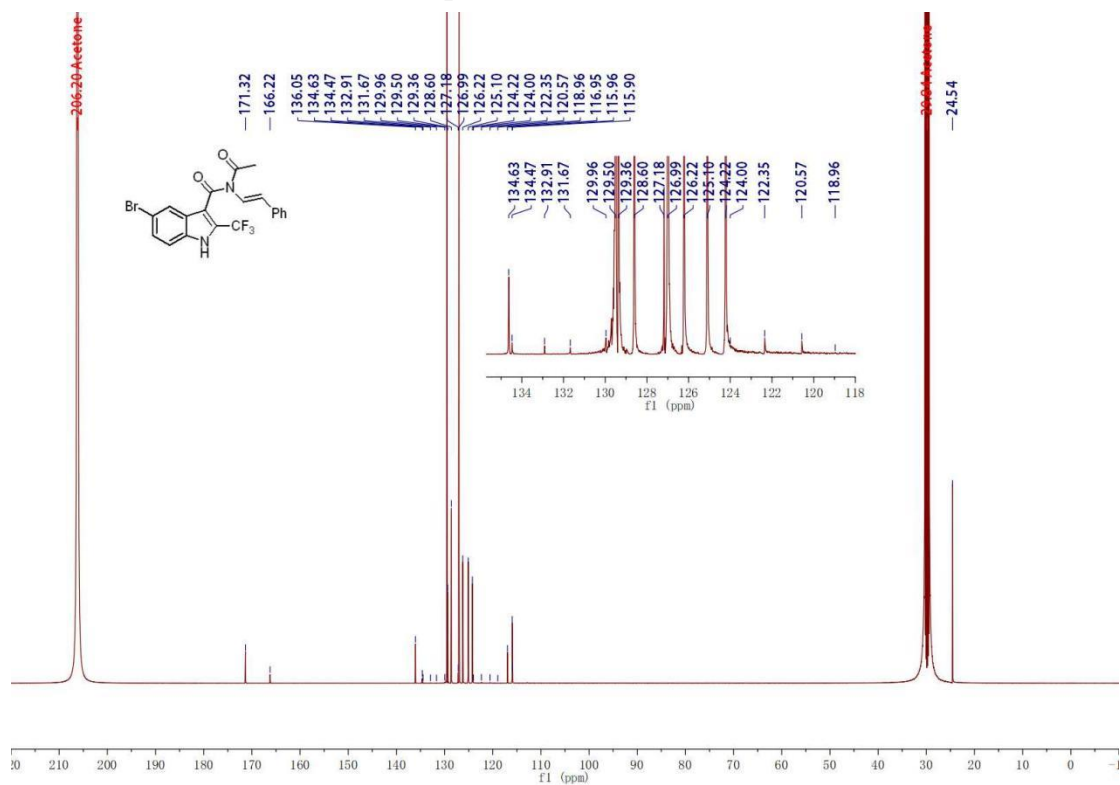

**<sup>19</sup>F NMR (376 MHz, Acetone-*d*<sub>6</sub>) spectrum of 4ea**

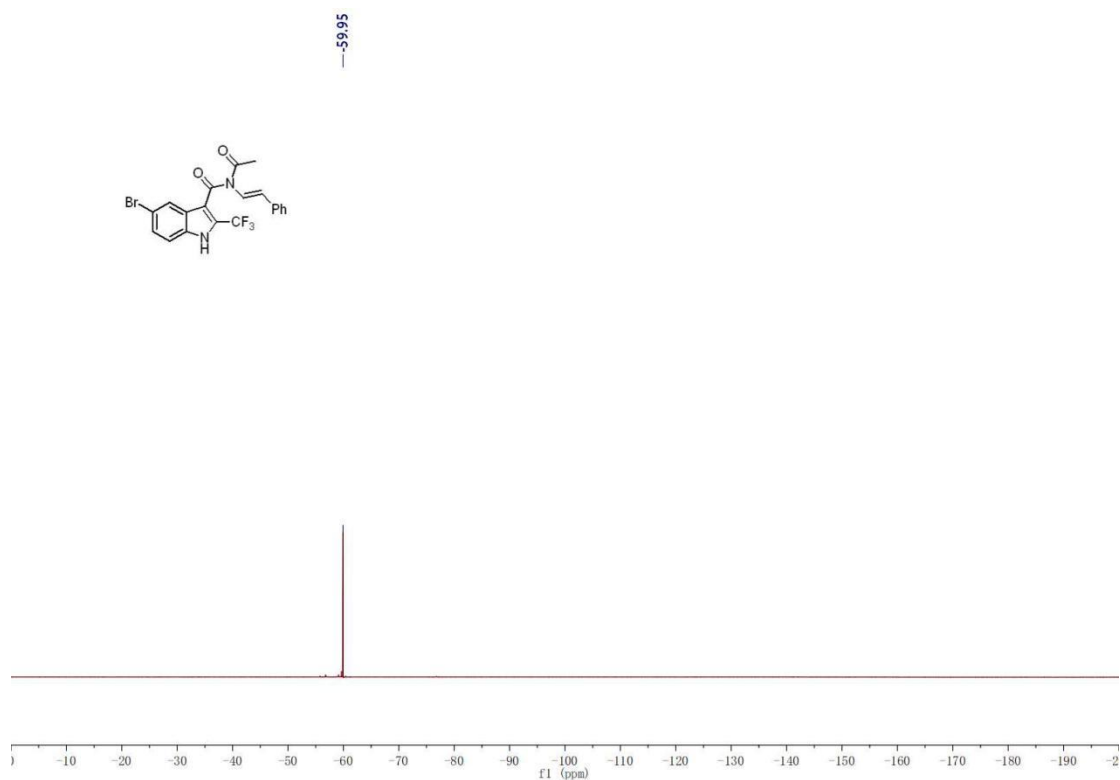

**<sup>1</sup>H NMR (400 MHz, Acetone-*d*<sub>6</sub>) spectrum of 5ea**

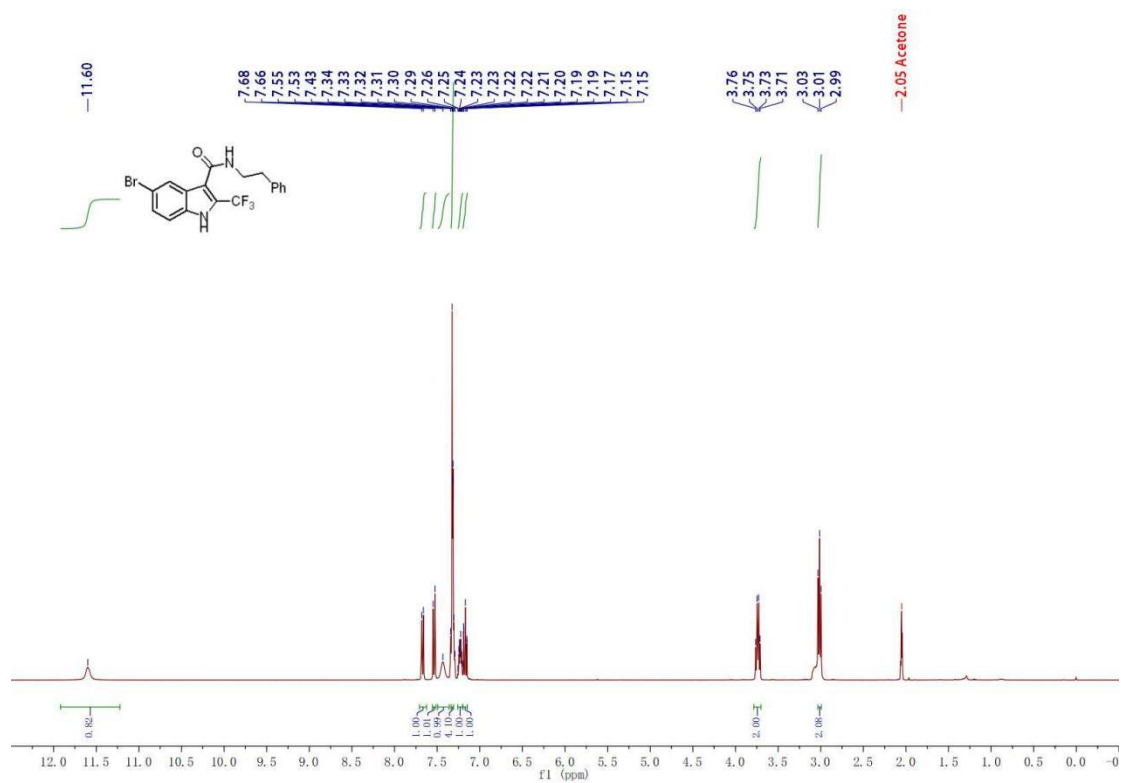

**<sup>13</sup>C NMR (150 MHz, Acetone-*d*<sub>6</sub>) spectrum of 5ea**

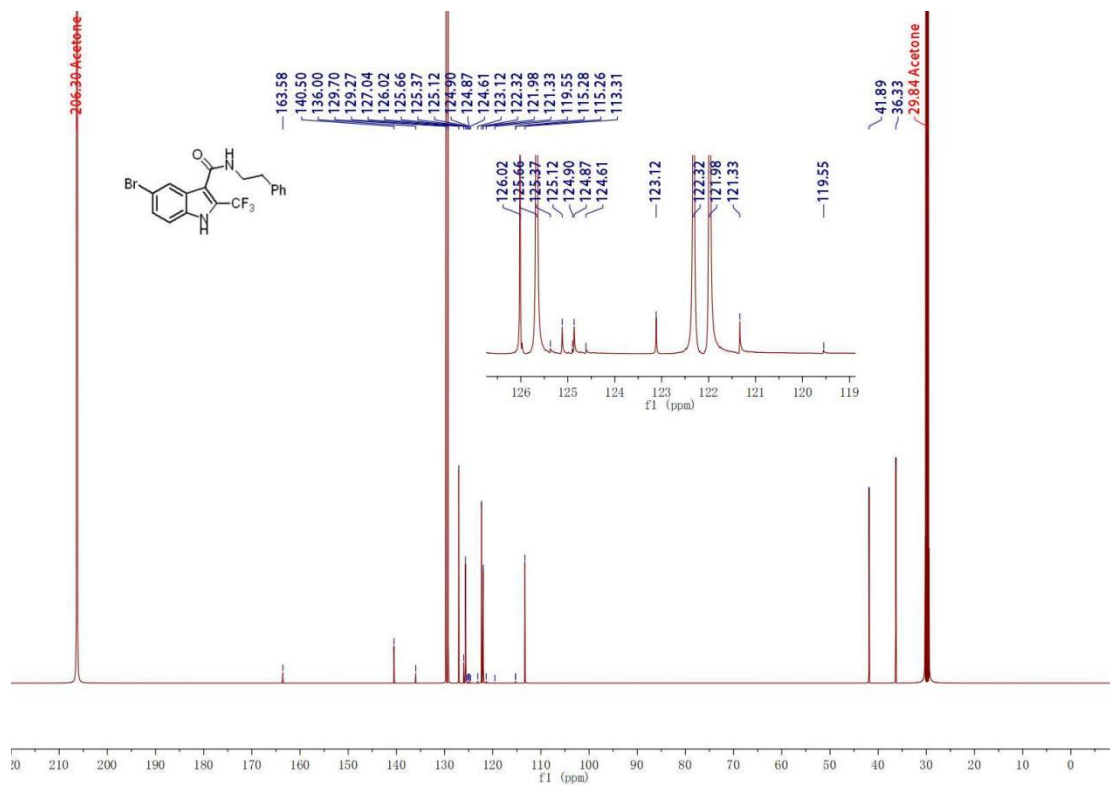

**<sup>19</sup>F NMR (376 MHz, Acetone-*d*6) spectrum of 5ea**

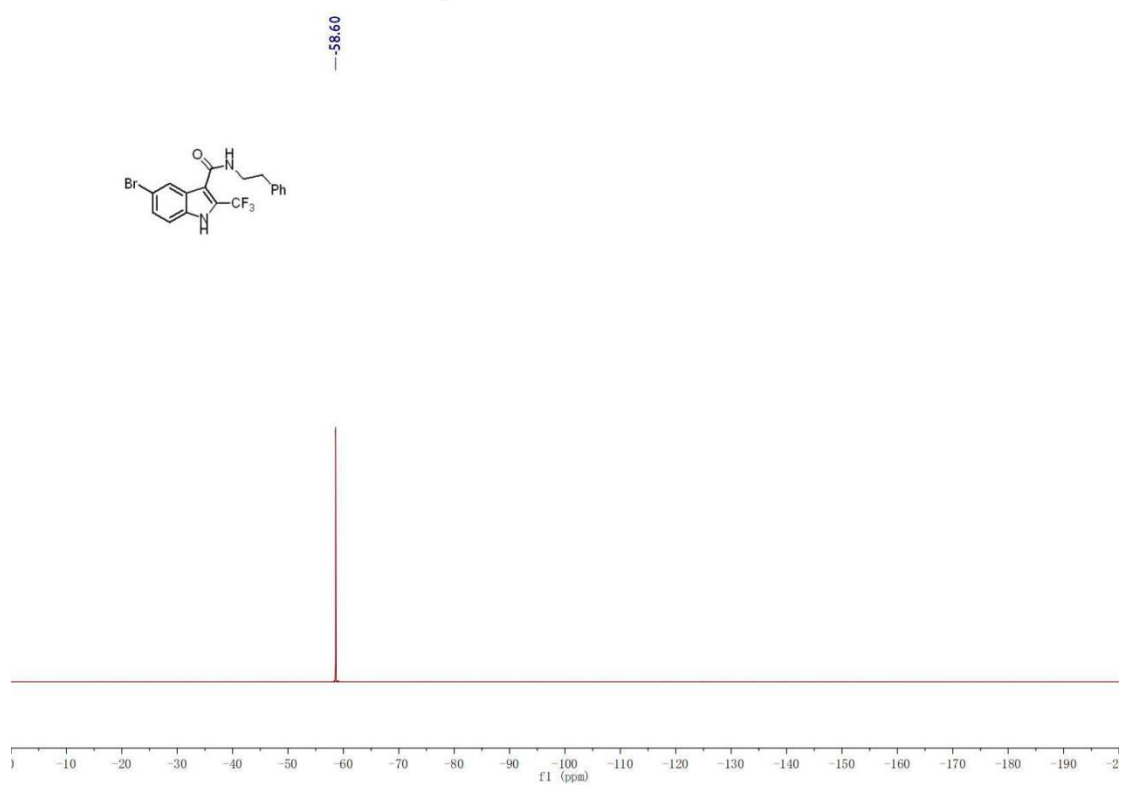

**<sup>1</sup>H NMR (400 MHz, Acetone-*d*6) spectrum of 6ea**

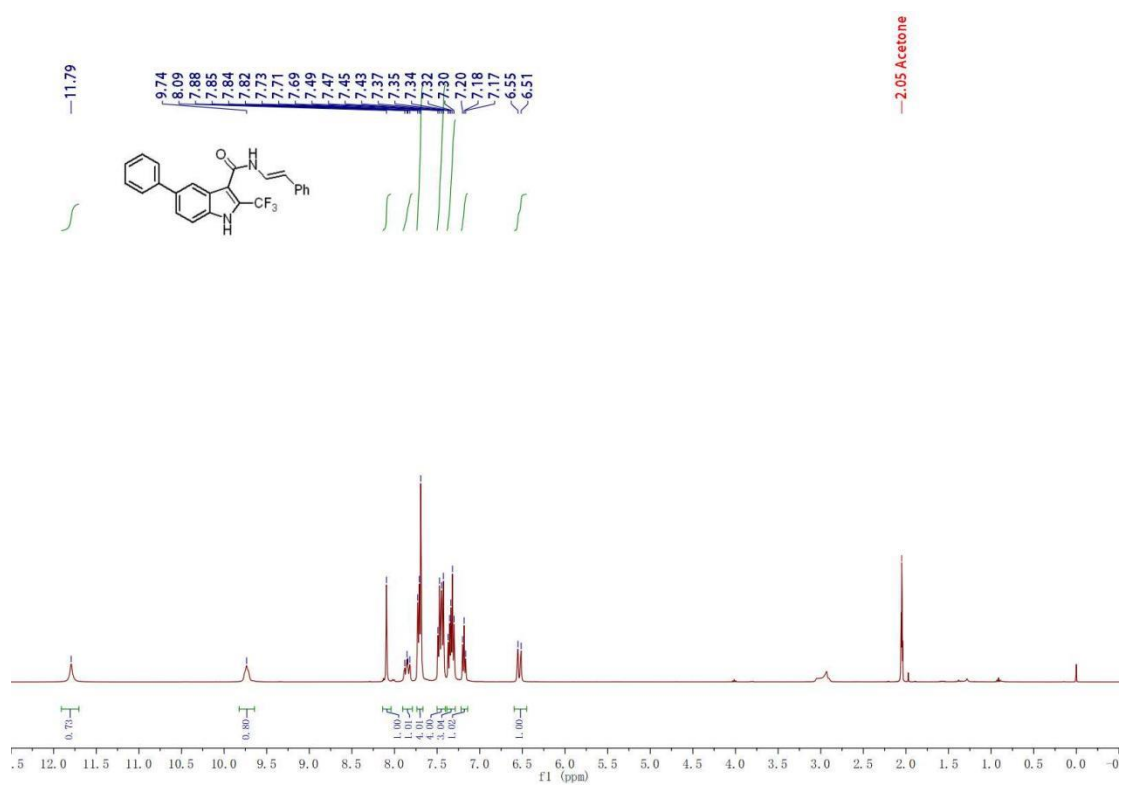

**<sup>13</sup>C NMR (100 MHz, Acetone-*d*<sub>6</sub>) spectrum of 6ea**

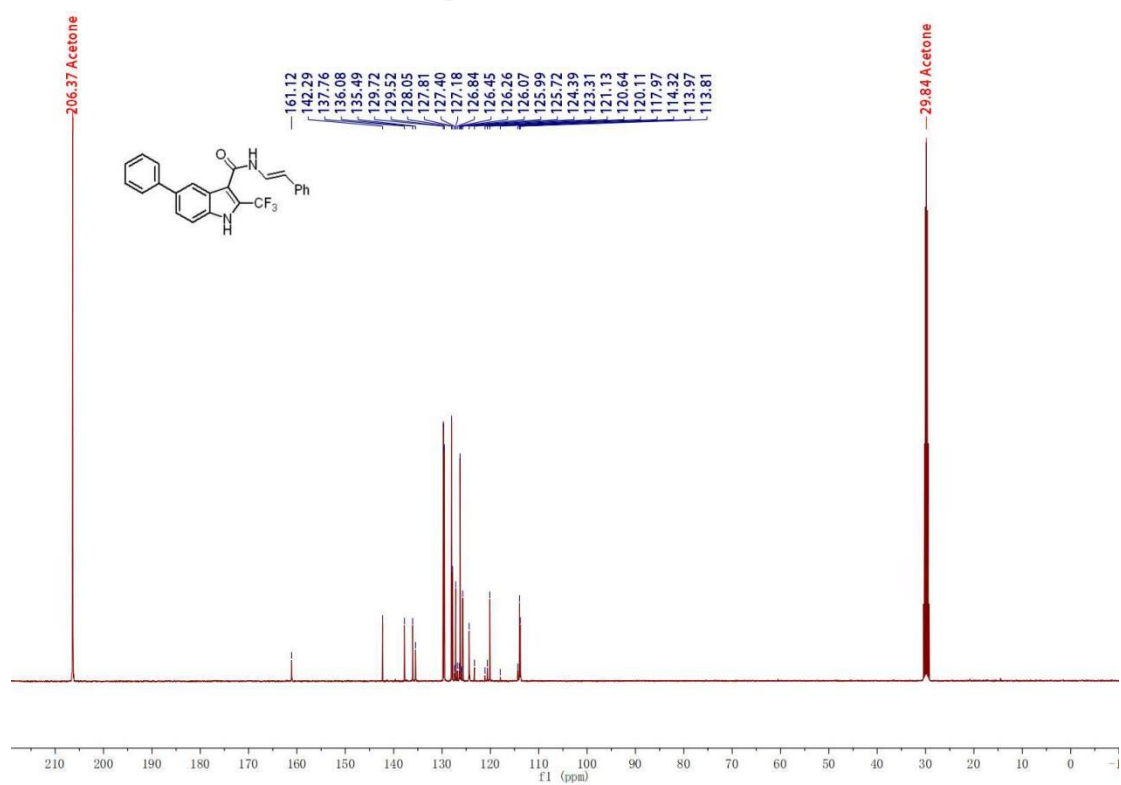

**<sup>19</sup>F NMR (376 MHz, Acetone-*d*<sub>6</sub>) spectrum of 6ea**

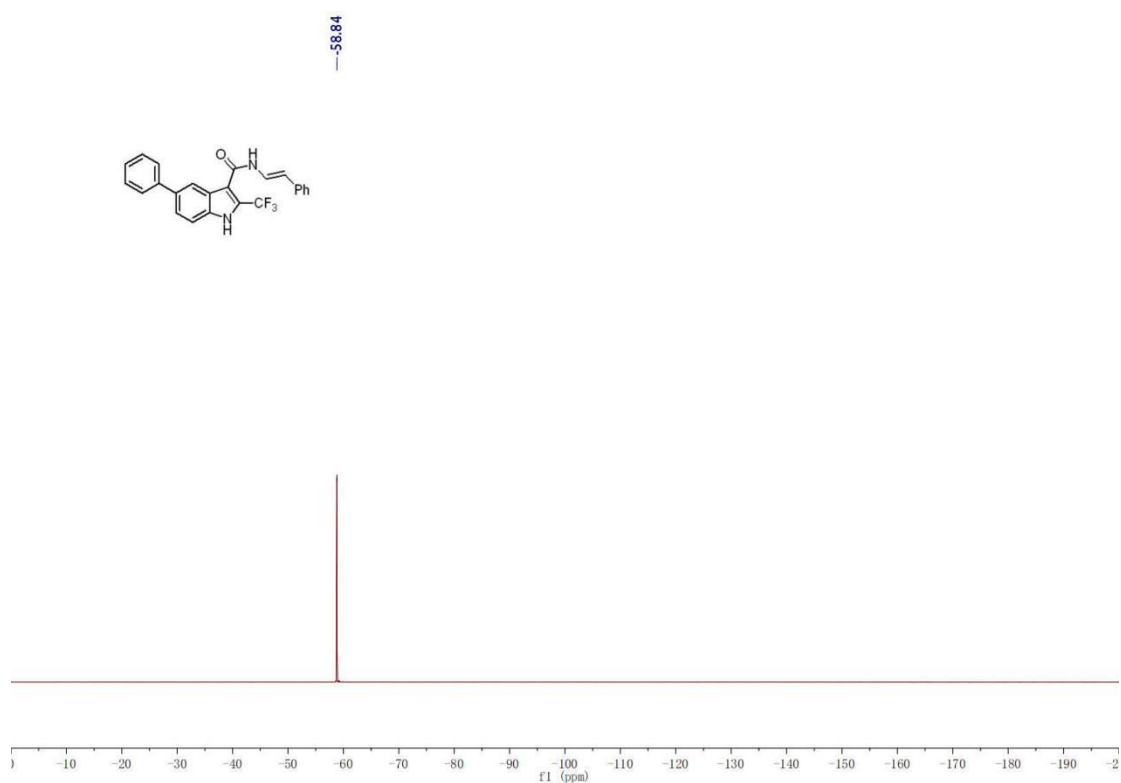



**<sup>1</sup>H NMR (600 MHz, Acetone-*d*<sub>6</sub>) spectrum of 7ea**

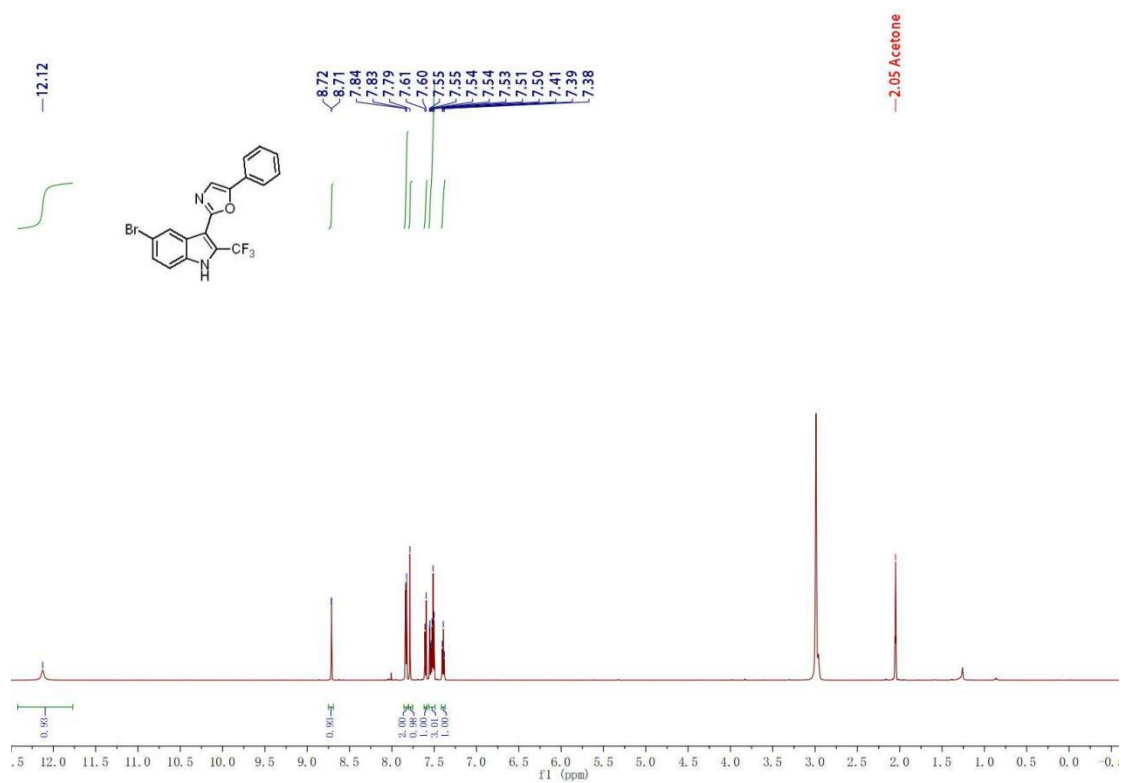

**<sup>13</sup>C NMR (150 MHz, Acetone-*d*<sub>6</sub>) spectrum of 7ea**

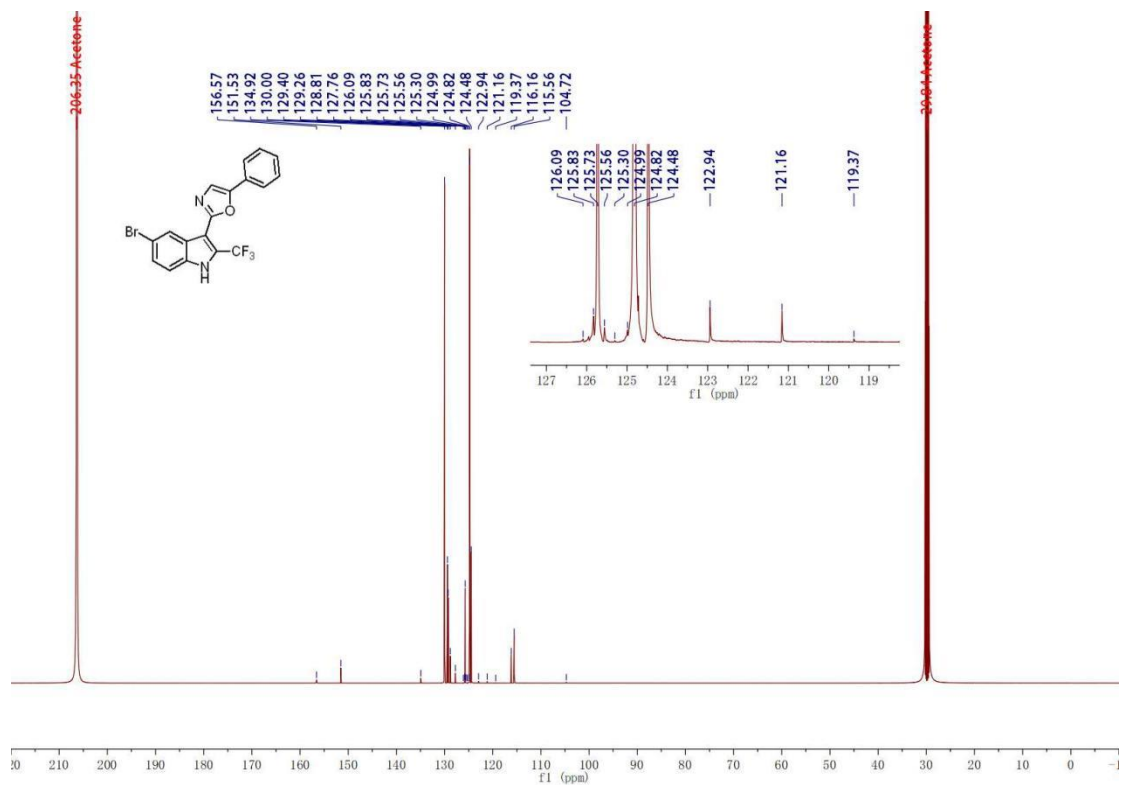

**<sup>19</sup>F NMR (376 MHz, Acetone-*d*<sub>6</sub>) spectrum of 7ea**

-117.42

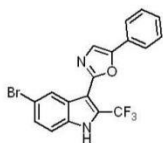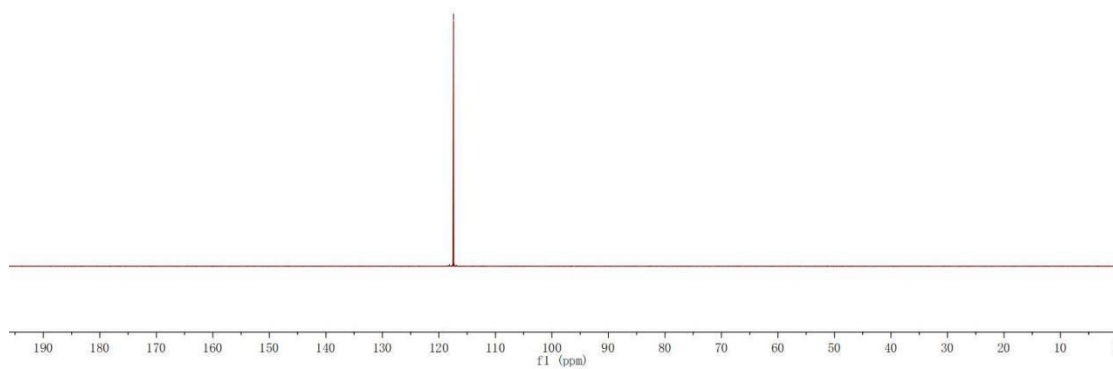

Supplement: d4cc05513f1.pdf [file d4cc05513f1.pdf]
